# Supplementary material for: Polyhedral cobaltadiselenaboranes: nido structures without bridging hydrogens
Source: Royal Society of Chemistry journal article supplement (doi:10.1039/c6ra09821e), 2016-01-01
Supplement: c6ra09821e1.pdf [file c6ra09821e1.pdf]

# Polyhedral Cobaltadiselenaboranes: *Nido* Structures without Bridging Hydrogens

Amr A. A. Attia,<sup>1,2</sup> Alexandru Lupan,\*<sup>1</sup> and R. Bruce King\*<sup>3</sup>

<sup>1</sup> *Department of Chemistry, Faculty of Chemistry and Chemical Engineering, Babeş-Bolyai University, Cluj-Napoca, Romania*

<sup>2</sup> *National Institute for Research and Development of Isotopic and Molecular Technologies, Cluj-Napoca, Romania*

<sup>3</sup> *Department of Chemistry and Center for Computational Quantum Chemistry, University of Georgia, Athens, Georgia, 30602, USA*

## Supporting Information

Table S1A. Initial CpCoSe<sub>2</sub>B<sub>5</sub>H<sub>5</sub> structures.

Table S1B. Distance table for the lowest-lying CpCoSe<sub>2</sub>B<sub>5</sub>H<sub>5</sub> structures.

Table S1C. Energy ranking for all the CpCoSe<sub>2</sub>B<sub>5</sub>H<sub>5</sub> structures.

Table S2A. Initial CpCoSe<sub>2</sub>B<sub>6</sub>H<sub>6</sub> structures.

Table S2B. Distance table for the lowest-lying CpCoSe<sub>2</sub>B<sub>6</sub>H<sub>6</sub> structures.

Table S2C. Energy ranking for all the CpCoSe<sub>2</sub>B<sub>6</sub>H<sub>6</sub> structures.

Table S3A. Initial CpCoSe<sub>2</sub>B<sub>7</sub>H<sub>7</sub> structures.

Table S3B. Distances table for the lowest-lying CpCoSe<sub>2</sub>B<sub>7</sub>H<sub>7</sub> structures.

Table S3C. Energy ranking for all the CpCoSe<sub>2</sub>B<sub>7</sub>H<sub>7</sub> structures.

Table S4A. Initial CpCoSe<sub>2</sub>B<sub>8</sub>H<sub>8</sub> structures.

Table S4B. Distance table for the lowest-lying CpCoSe<sub>2</sub>B<sub>8</sub>H<sub>8</sub> structures.

Table S4C. Energy ranking for all the CpCoSe<sub>2</sub>B<sub>8</sub>H<sub>8</sub> structures.

Table S5A. Initial CpCoSe<sub>2</sub>B<sub>9</sub>H<sub>9</sub> structures.

Table S5B. Distance table for the lowest-lying CpCoSe<sub>2</sub>B<sub>9</sub>H<sub>9</sub> structures.

Table S5C. Energy ranking for all the CpCoSe<sub>2</sub>B<sub>9</sub>H<sub>9</sub> structures.

Table S6. Orbital energies and HOMO/LUMO gaps.

Cartesian coordinates of all optimized structures (M06-L/6-311G(d,p)).

Complete Gaussian09 Reference (reference 24)

Gaussian 09, Revision A.02,

M. J. Frisch, G. W. Trucks, H. B. Schlegel, G. E. Scuseria, M. A. Robb, J. R. Cheeseman, G. Scalmani, V. Barone, B. Mennucci, G. A. Petersson, H. Nakatsuji, M. Caricato, X. Li, H. P. Hratchian, A. F. Izmaylov, J. Bloino, G. Zheng, J. L. Sonnenberg, M. Hada, M. Ehara, K. Toyota, R. Fukuda, J. Hasegawa, M. Ishida, T. Nakajima, Y. Honda, O. Kitao, H. Nakai, T. Vreven, J. A. Montgomery, Jr., J. E. Peralta, F. Ogliaro, M. Bearpark, J. J. Heyd, E. Brothers, K. N. Kudin, V. N. Staroverov, R. Kobayashi, J. Normand, K. Raghavachari, A. Rendell, J. C. Burant, S. S. Iyengar, J. Tomasi, M. Cossi, N. Rega, J. M. Millam, M. Klene, J. E. Knox, J. B. Cross, V. Bakken, C. Adamo, J. Jaramillo, R. Gomperts, R. E. Stratmann, O. Yazyev, A. J. Austin, R. Cammi, C. Pomelli, J. W. Ochterski, R. L. Martin, K. Morokuma, V. G. Zakrzewski, G. A. Voth, P. Salvador, J. J. Dannenberg, S. Dapprich, A. D. Daniels, O. Farkas, J. B. Foresman, J. V. Ortiz, J. Cioslowski, and D. J. Fox, Gaussian, Inc., Wallingford CT, 2009.

Table S1A. Initial CpCoSe<sub>2</sub>B<sub>5</sub>H<sub>5</sub> structures, 291 structures:

|                                                                                                                                              |                                                                                                                                                |                                                                                                                         |
|----------------------------------------------------------------------------------------------------------------------------------------------|------------------------------------------------------------------------------------------------------------------------------------------------|-------------------------------------------------------------------------------------------------------------------------|
| <p><b>Initial structures</b></p>                                                                                                             | 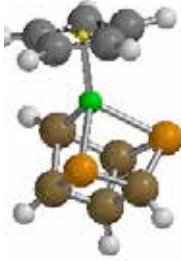 <p>1. Cube 7</p>                                             |  <p>2. Antiprism 11</p>              |
|  <p>3. Trigonal Prism 12</p>                                |  <p>4. Trigonal Antiprism 14</p>                              |  <p>5. Bisdisphenoid 26</p>          |
|  <p>6. Hexagonal bipyramid 15</p>                          |  <p>7. All-capped tetrahedron 27</p>                         |  <p>8. Nido structure 31</p>        |
|  <p>9. Dicapped trigonal prism<br/>(C<sub>s</sub>) 56</p> |  <p>10. Dicapped trigonal prism<br/>(C<sub>2v</sub>) 55</p> |  <p>11. Dicapped octahedron 37</p> |

Table S1B. Distance table for the lowest-lying CpCoSe<sub>2</sub>B<sub>5</sub>H<sub>5</sub> structures after M06L/6-311G(d,p) optimization. Included are the ZPcorrected E (a.u.), relative energy (kcal/mol) and symmetry. For clarity only the atoms forming the cluster framework are presented.

| 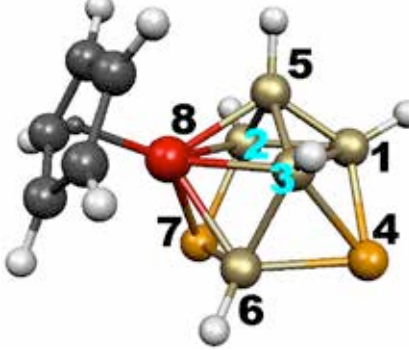 <p>1. -6506.4145852 0.0 C<sub>1</sub></p>    | <table border="1"> <thead> <tr> <th></th> <th>1</th> <th>2</th> <th>3</th> <th>4</th> <th>5</th> </tr> </thead> <tbody> <tr><td>1 B</td><td>0.000000</td><td></td><td></td><td></td><td></td></tr> <tr><td>2 B</td><td>2.050512</td><td>0.000000</td><td></td><td></td><td></td></tr> <tr><td>3 B</td><td>1.861402</td><td>2.710680</td><td>0.000000</td><td></td><td></td></tr> <tr><td>4 Se</td><td>1.980502</td><td>3.289335</td><td>2.078780</td><td>0.000000</td><td></td></tr> <tr><td>5 B</td><td>1.650376</td><td>1.693784</td><td>1.712288</td><td>3.151374</td><td>0.000000</td></tr> <tr><td>6 B</td><td>2.792426</td><td>2.794028</td><td>1.896722</td><td>2.044669</td><td>2.912809</td></tr> <tr><td>7 Se</td><td>3.231661</td><td>1.970467</td><td>3.255014</td><td>3.282889</td><td>3.191196</td></tr> <tr><td>8 Co</td><td>3.075145</td><td>2.168051</td><td>2.130728</td><td>3.594855</td><td>2.007613</td></tr> <tr><td></td><td>6</td><td>7</td><td>8</td><td></td><td></td></tr> <tr><td>6 B</td><td>0.000000</td><td></td><td></td><td></td><td></td></tr> <tr><td>7 Se</td><td>2.025828</td><td>0.000000</td><td></td><td></td><td></td></tr> <tr><td>8 Co</td><td>2.101003</td><td>2.329242</td><td>0.000000</td><td></td><td></td></tr> </tbody> </table> |          | 1        | 2        | 3        | 4 | 5 | 1 B  | 0.000000 |  |  |  |  | 2 B | 2.050512 | 0.000000 |  |  |  | 3 B  | 1.861402 | 2.710680 | 0.000000 |  |  | 4 Se | 1.980502 | 3.289335 | 2.078780 | 0.000000 |  | 5 B  | 1.650376 | 1.693784 | 1.712288 | 3.151374 | 0.000000 | 6 B | 2.792426 | 2.794028 | 1.896722 | 2.044669 | 2.912809 | 7 Se | 3.231661 | 1.970467 | 3.255014 | 3.282889 | 3.191196 | 8 Co | 3.075145 | 2.168051 | 2.130728 | 3.594855 | 2.007613 |  | 6 | 7 | 8 |  |  | 6 B | 0.000000 |  |  |  |  | 7 Se | 2.025828 | 0.000000 |  |  |  | 8 Co | 2.101003 | 2.329242 | 0.000000 |  |  |
|--------------------------------------------------------------------------------------------------------------------------------|------------------------------------------------------------------------------------------------------------------------------------------------------------------------------------------------------------------------------------------------------------------------------------------------------------------------------------------------------------------------------------------------------------------------------------------------------------------------------------------------------------------------------------------------------------------------------------------------------------------------------------------------------------------------------------------------------------------------------------------------------------------------------------------------------------------------------------------------------------------------------------------------------------------------------------------------------------------------------------------------------------------------------------------------------------------------------------------------------------------------------------------------------------------------------------------------------------------------------------------------------------------------------------|----------|----------|----------|----------|---|---|------|----------|--|--|--|--|-----|----------|----------|--|--|--|------|----------|----------|----------|--|--|------|----------|----------|----------|----------|--|------|----------|----------|----------|----------|----------|-----|----------|----------|----------|----------|----------|------|----------|----------|----------|----------|----------|------|----------|----------|----------|----------|----------|--|---|---|---|--|--|-----|----------|--|--|--|--|------|----------|----------|--|--|--|------|----------|----------|----------|--|--|
|                                                                                                                                | 1                                                                                                                                                                                                                                                                                                                                                                                                                                                                                                                                                                                                                                                                                                                                                                                                                                                                                                                                                                                                                                                                                                                                                                                                                                                                                  | 2        | 3        | 4        | 5        |   |   |      |          |  |  |  |  |     |          |          |  |  |  |      |          |          |          |  |  |      |          |          |          |          |  |      |          |          |          |          |          |     |          |          |          |          |          |      |          |          |          |          |          |      |          |          |          |          |          |  |   |   |   |  |  |     |          |  |  |  |  |      |          |          |  |  |  |      |          |          |          |  |  |
| 1 B                                                                                                                            | 0.000000                                                                                                                                                                                                                                                                                                                                                                                                                                                                                                                                                                                                                                                                                                                                                                                                                                                                                                                                                                                                                                                                                                                                                                                                                                                                           |          |          |          |          |   |   |      |          |  |  |  |  |     |          |          |  |  |  |      |          |          |          |  |  |      |          |          |          |          |  |      |          |          |          |          |          |     |          |          |          |          |          |      |          |          |          |          |          |      |          |          |          |          |          |  |   |   |   |  |  |     |          |  |  |  |  |      |          |          |  |  |  |      |          |          |          |  |  |
| 2 B                                                                                                                            | 2.050512                                                                                                                                                                                                                                                                                                                                                                                                                                                                                                                                                                                                                                                                                                                                                                                                                                                                                                                                                                                                                                                                                                                                                                                                                                                                           | 0.000000 |          |          |          |   |   |      |          |  |  |  |  |     |          |          |  |  |  |      |          |          |          |  |  |      |          |          |          |          |  |      |          |          |          |          |          |     |          |          |          |          |          |      |          |          |          |          |          |      |          |          |          |          |          |  |   |   |   |  |  |     |          |  |  |  |  |      |          |          |  |  |  |      |          |          |          |  |  |
| 3 B                                                                                                                            | 1.861402                                                                                                                                                                                                                                                                                                                                                                                                                                                                                                                                                                                                                                                                                                                                                                                                                                                                                                                                                                                                                                                                                                                                                                                                                                                                           | 2.710680 | 0.000000 |          |          |   |   |      |          |  |  |  |  |     |          |          |  |  |  |      |          |          |          |  |  |      |          |          |          |          |  |      |          |          |          |          |          |     |          |          |          |          |          |      |          |          |          |          |          |      |          |          |          |          |          |  |   |   |   |  |  |     |          |  |  |  |  |      |          |          |  |  |  |      |          |          |          |  |  |
| 4 Se                                                                                                                           | 1.980502                                                                                                                                                                                                                                                                                                                                                                                                                                                                                                                                                                                                                                                                                                                                                                                                                                                                                                                                                                                                                                                                                                                                                                                                                                                                           | 3.289335 | 2.078780 | 0.000000 |          |   |   |      |          |  |  |  |  |     |          |          |  |  |  |      |          |          |          |  |  |      |          |          |          |          |  |      |          |          |          |          |          |     |          |          |          |          |          |      |          |          |          |          |          |      |          |          |          |          |          |  |   |   |   |  |  |     |          |  |  |  |  |      |          |          |  |  |  |      |          |          |          |  |  |
| 5 B                                                                                                                            | 1.650376                                                                                                                                                                                                                                                                                                                                                                                                                                                                                                                                                                                                                                                                                                                                                                                                                                                                                                                                                                                                                                                                                                                                                                                                                                                                           | 1.693784 | 1.712288 | 3.151374 | 0.000000 |   |   |      |          |  |  |  |  |     |          |          |  |  |  |      |          |          |          |  |  |      |          |          |          |          |  |      |          |          |          |          |          |     |          |          |          |          |          |      |          |          |          |          |          |      |          |          |          |          |          |  |   |   |   |  |  |     |          |  |  |  |  |      |          |          |  |  |  |      |          |          |          |  |  |
| 6 B                                                                                                                            | 2.792426                                                                                                                                                                                                                                                                                                                                                                                                                                                                                                                                                                                                                                                                                                                                                                                                                                                                                                                                                                                                                                                                                                                                                                                                                                                                           | 2.794028 | 1.896722 | 2.044669 | 2.912809 |   |   |      |          |  |  |  |  |     |          |          |  |  |  |      |          |          |          |  |  |      |          |          |          |          |  |      |          |          |          |          |          |     |          |          |          |          |          |      |          |          |          |          |          |      |          |          |          |          |          |  |   |   |   |  |  |     |          |  |  |  |  |      |          |          |  |  |  |      |          |          |          |  |  |
| 7 Se                                                                                                                           | 3.231661                                                                                                                                                                                                                                                                                                                                                                                                                                                                                                                                                                                                                                                                                                                                                                                                                                                                                                                                                                                                                                                                                                                                                                                                                                                                           | 1.970467 | 3.255014 | 3.282889 | 3.191196 |   |   |      |          |  |  |  |  |     |          |          |  |  |  |      |          |          |          |  |  |      |          |          |          |          |  |      |          |          |          |          |          |     |          |          |          |          |          |      |          |          |          |          |          |      |          |          |          |          |          |  |   |   |   |  |  |     |          |  |  |  |  |      |          |          |  |  |  |      |          |          |          |  |  |
| 8 Co                                                                                                                           | 3.075145                                                                                                                                                                                                                                                                                                                                                                                                                                                                                                                                                                                                                                                                                                                                                                                                                                                                                                                                                                                                                                                                                                                                                                                                                                                                           | 2.168051 | 2.130728 | 3.594855 | 2.007613 |   |   |      |          |  |  |  |  |     |          |          |  |  |  |      |          |          |          |  |  |      |          |          |          |          |  |      |          |          |          |          |          |     |          |          |          |          |          |      |          |          |          |          |          |      |          |          |          |          |          |  |   |   |   |  |  |     |          |  |  |  |  |      |          |          |  |  |  |      |          |          |          |  |  |
|                                                                                                                                | 6                                                                                                                                                                                                                                                                                                                                                                                                                                                                                                                                                                                                                                                                                                                                                                                                                                                                                                                                                                                                                                                                                                                                                                                                                                                                                  | 7        | 8        |          |          |   |   |      |          |  |  |  |  |     |          |          |  |  |  |      |          |          |          |  |  |      |          |          |          |          |  |      |          |          |          |          |          |     |          |          |          |          |          |      |          |          |          |          |          |      |          |          |          |          |          |  |   |   |   |  |  |     |          |  |  |  |  |      |          |          |  |  |  |      |          |          |          |  |  |
| 6 B                                                                                                                            | 0.000000                                                                                                                                                                                                                                                                                                                                                                                                                                                                                                                                                                                                                                                                                                                                                                                                                                                                                                                                                                                                                                                                                                                                                                                                                                                                           |          |          |          |          |   |   |      |          |  |  |  |  |     |          |          |  |  |  |      |          |          |          |  |  |      |          |          |          |          |  |      |          |          |          |          |          |     |          |          |          |          |          |      |          |          |          |          |          |      |          |          |          |          |          |  |   |   |   |  |  |     |          |  |  |  |  |      |          |          |  |  |  |      |          |          |          |  |  |
| 7 Se                                                                                                                           | 2.025828                                                                                                                                                                                                                                                                                                                                                                                                                                                                                                                                                                                                                                                                                                                                                                                                                                                                                                                                                                                                                                                                                                                                                                                                                                                                           | 0.000000 |          |          |          |   |   |      |          |  |  |  |  |     |          |          |  |  |  |      |          |          |          |  |  |      |          |          |          |          |  |      |          |          |          |          |          |     |          |          |          |          |          |      |          |          |          |          |          |      |          |          |          |          |          |  |   |   |   |  |  |     |          |  |  |  |  |      |          |          |  |  |  |      |          |          |          |  |  |
| 8 Co                                                                                                                           | 2.101003                                                                                                                                                                                                                                                                                                                                                                                                                                                                                                                                                                                                                                                                                                                                                                                                                                                                                                                                                                                                                                                                                                                                                                                                                                                                           | 2.329242 | 0.000000 |          |          |   |   |      |          |  |  |  |  |     |          |          |  |  |  |      |          |          |          |  |  |      |          |          |          |          |  |      |          |          |          |          |          |     |          |          |          |          |          |      |          |          |          |          |          |      |          |          |          |          |          |  |   |   |   |  |  |     |          |  |  |  |  |      |          |          |  |  |  |      |          |          |          |  |  |
|  <p>2. -6506.4073134 +4.6 C<sub>s</sub></p>  | <table border="1"> <thead> <tr> <th></th> <th>1</th> <th>2</th> <th>3</th> <th>4</th> <th>5</th> </tr> </thead> <tbody> <tr><td>1 Se</td><td>0.000000</td><td></td><td></td><td></td><td></td></tr> <tr><td>2 B</td><td>3.327956</td><td>0.000000</td><td></td><td></td><td></td></tr> <tr><td>3 Co</td><td>2.344117</td><td>3.235359</td><td>0.000000</td><td></td><td></td></tr> <tr><td>4 B</td><td>1.956922</td><td>2.131658</td><td>3.235349</td><td>0.000000</td><td></td></tr> <tr><td>5 Se</td><td>3.399071</td><td>1.956923</td><td>2.344115</td><td>3.327930</td><td>0.000000</td></tr> <tr><td>6 B</td><td>2.088056</td><td>2.737261</td><td>2.125792</td><td>1.878987</td><td>3.267662</td></tr> <tr><td>7 B</td><td>3.129049</td><td>1.656149</td><td>3.251454</td><td>1.656154</td><td>3.129042</td></tr> <tr><td>8 B</td><td>3.267686</td><td>1.878979</td><td>2.125810</td><td>2.737266</td><td>2.088052</td></tr> <tr><td></td><td>6</td><td>7</td><td>8</td><td></td><td></td></tr> <tr><td>6 B</td><td>0.000000</td><td></td><td></td><td></td><td></td></tr> <tr><td>7 B</td><td>1.723513</td><td>0.000000</td><td></td><td></td><td></td></tr> <tr><td>8 B</td><td>1.858662</td><td>1.723514</td><td>0.000000</td><td></td><td></td></tr> </tbody> </table>   |          | 1        | 2        | 3        | 4 | 5 | 1 Se | 0.000000 |  |  |  |  | 2 B | 3.327956 | 0.000000 |  |  |  | 3 Co | 2.344117 | 3.235359 | 0.000000 |  |  | 4 B  | 1.956922 | 2.131658 | 3.235349 | 0.000000 |  | 5 Se | 3.399071 | 1.956923 | 2.344115 | 3.327930 | 0.000000 | 6 B | 2.088056 | 2.737261 | 2.125792 | 1.878987 | 3.267662 | 7 B  | 3.129049 | 1.656149 | 3.251454 | 1.656154 | 3.129042 | 8 B  | 3.267686 | 1.878979 | 2.125810 | 2.737266 | 2.088052 |  | 6 | 7 | 8 |  |  | 6 B | 0.000000 |  |  |  |  | 7 B  | 1.723513 | 0.000000 |  |  |  | 8 B  | 1.858662 | 1.723514 | 0.000000 |  |  |
|                                                                                                                                | 1                                                                                                                                                                                                                                                                                                                                                                                                                                                                                                                                                                                                                                                                                                                                                                                                                                                                                                                                                                                                                                                                                                                                                                                                                                                                                  | 2        | 3        | 4        | 5        |   |   |      |          |  |  |  |  |     |          |          |  |  |  |      |          |          |          |  |  |      |          |          |          |          |  |      |          |          |          |          |          |     |          |          |          |          |          |      |          |          |          |          |          |      |          |          |          |          |          |  |   |   |   |  |  |     |          |  |  |  |  |      |          |          |  |  |  |      |          |          |          |  |  |
| 1 Se                                                                                                                           | 0.000000                                                                                                                                                                                                                                                                                                                                                                                                                                                                                                                                                                                                                                                                                                                                                                                                                                                                                                                                                                                                                                                                                                                                                                                                                                                                           |          |          |          |          |   |   |      |          |  |  |  |  |     |          |          |  |  |  |      |          |          |          |  |  |      |          |          |          |          |  |      |          |          |          |          |          |     |          |          |          |          |          |      |          |          |          |          |          |      |          |          |          |          |          |  |   |   |   |  |  |     |          |  |  |  |  |      |          |          |  |  |  |      |          |          |          |  |  |
| 2 B                                                                                                                            | 3.327956                                                                                                                                                                                                                                                                                                                                                                                                                                                                                                                                                                                                                                                                                                                                                                                                                                                                                                                                                                                                                                                                                                                                                                                                                                                                           | 0.000000 |          |          |          |   |   |      |          |  |  |  |  |     |          |          |  |  |  |      |          |          |          |  |  |      |          |          |          |          |  |      |          |          |          |          |          |     |          |          |          |          |          |      |          |          |          |          |          |      |          |          |          |          |          |  |   |   |   |  |  |     |          |  |  |  |  |      |          |          |  |  |  |      |          |          |          |  |  |
| 3 Co                                                                                                                           | 2.344117                                                                                                                                                                                                                                                                                                                                                                                                                                                                                                                                                                                                                                                                                                                                                                                                                                                                                                                                                                                                                                                                                                                                                                                                                                                                           | 3.235359 | 0.000000 |          |          |   |   |      |          |  |  |  |  |     |          |          |  |  |  |      |          |          |          |  |  |      |          |          |          |          |  |      |          |          |          |          |          |     |          |          |          |          |          |      |          |          |          |          |          |      |          |          |          |          |          |  |   |   |   |  |  |     |          |  |  |  |  |      |          |          |  |  |  |      |          |          |          |  |  |
| 4 B                                                                                                                            | 1.956922                                                                                                                                                                                                                                                                                                                                                                                                                                                                                                                                                                                                                                                                                                                                                                                                                                                                                                                                                                                                                                                                                                                                                                                                                                                                           | 2.131658 | 3.235349 | 0.000000 |          |   |   |      |          |  |  |  |  |     |          |          |  |  |  |      |          |          |          |  |  |      |          |          |          |          |  |      |          |          |          |          |          |     |          |          |          |          |          |      |          |          |          |          |          |      |          |          |          |          |          |  |   |   |   |  |  |     |          |  |  |  |  |      |          |          |  |  |  |      |          |          |          |  |  |
| 5 Se                                                                                                                           | 3.399071                                                                                                                                                                                                                                                                                                                                                                                                                                                                                                                                                                                                                                                                                                                                                                                                                                                                                                                                                                                                                                                                                                                                                                                                                                                                           | 1.956923 | 2.344115 | 3.327930 | 0.000000 |   |   |      |          |  |  |  |  |     |          |          |  |  |  |      |          |          |          |  |  |      |          |          |          |          |  |      |          |          |          |          |          |     |          |          |          |          |          |      |          |          |          |          |          |      |          |          |          |          |          |  |   |   |   |  |  |     |          |  |  |  |  |      |          |          |  |  |  |      |          |          |          |  |  |
| 6 B                                                                                                                            | 2.088056                                                                                                                                                                                                                                                                                                                                                                                                                                                                                                                                                                                                                                                                                                                                                                                                                                                                                                                                                                                                                                                                                                                                                                                                                                                                           | 2.737261 | 2.125792 | 1.878987 | 3.267662 |   |   |      |          |  |  |  |  |     |          |          |  |  |  |      |          |          |          |  |  |      |          |          |          |          |  |      |          |          |          |          |          |     |          |          |          |          |          |      |          |          |          |          |          |      |          |          |          |          |          |  |   |   |   |  |  |     |          |  |  |  |  |      |          |          |  |  |  |      |          |          |          |  |  |
| 7 B                                                                                                                            | 3.129049                                                                                                                                                                                                                                                                                                                                                                                                                                                                                                                                                                                                                                                                                                                                                                                                                                                                                                                                                                                                                                                                                                                                                                                                                                                                           | 1.656149 | 3.251454 | 1.656154 | 3.129042 |   |   |      |          |  |  |  |  |     |          |          |  |  |  |      |          |          |          |  |  |      |          |          |          |          |  |      |          |          |          |          |          |     |          |          |          |          |          |      |          |          |          |          |          |      |          |          |          |          |          |  |   |   |   |  |  |     |          |  |  |  |  |      |          |          |  |  |  |      |          |          |          |  |  |
| 8 B                                                                                                                            | 3.267686                                                                                                                                                                                                                                                                                                                                                                                                                                                                                                                                                                                                                                                                                                                                                                                                                                                                                                                                                                                                                                                                                                                                                                                                                                                                           | 1.878979 | 2.125810 | 2.737266 | 2.088052 |   |   |      |          |  |  |  |  |     |          |          |  |  |  |      |          |          |          |  |  |      |          |          |          |          |  |      |          |          |          |          |          |     |          |          |          |          |          |      |          |          |          |          |          |      |          |          |          |          |          |  |   |   |   |  |  |     |          |  |  |  |  |      |          |          |  |  |  |      |          |          |          |  |  |
|                                                                                                                                | 6                                                                                                                                                                                                                                                                                                                                                                                                                                                                                                                                                                                                                                                                                                                                                                                                                                                                                                                                                                                                                                                                                                                                                                                                                                                                                  | 7        | 8        |          |          |   |   |      |          |  |  |  |  |     |          |          |  |  |  |      |          |          |          |  |  |      |          |          |          |          |  |      |          |          |          |          |          |     |          |          |          |          |          |      |          |          |          |          |          |      |          |          |          |          |          |  |   |   |   |  |  |     |          |  |  |  |  |      |          |          |  |  |  |      |          |          |          |  |  |
| 6 B                                                                                                                            | 0.000000                                                                                                                                                                                                                                                                                                                                                                                                                                                                                                                                                                                                                                                                                                                                                                                                                                                                                                                                                                                                                                                                                                                                                                                                                                                                           |          |          |          |          |   |   |      |          |  |  |  |  |     |          |          |  |  |  |      |          |          |          |  |  |      |          |          |          |          |  |      |          |          |          |          |          |     |          |          |          |          |          |      |          |          |          |          |          |      |          |          |          |          |          |  |   |   |   |  |  |     |          |  |  |  |  |      |          |          |  |  |  |      |          |          |          |  |  |
| 7 B                                                                                                                            | 1.723513                                                                                                                                                                                                                                                                                                                                                                                                                                                                                                                                                                                                                                                                                                                                                                                                                                                                                                                                                                                                                                                                                                                                                                                                                                                                           | 0.000000 |          |          |          |   |   |      |          |  |  |  |  |     |          |          |  |  |  |      |          |          |          |  |  |      |          |          |          |          |  |      |          |          |          |          |          |     |          |          |          |          |          |      |          |          |          |          |          |      |          |          |          |          |          |  |   |   |   |  |  |     |          |  |  |  |  |      |          |          |  |  |  |      |          |          |          |  |  |
| 8 B                                                                                                                            | 1.858662                                                                                                                                                                                                                                                                                                                                                                                                                                                                                                                                                                                                                                                                                                                                                                                                                                                                                                                                                                                                                                                                                                                                                                                                                                                                           | 1.723514 | 0.000000 |          |          |   |   |      |          |  |  |  |  |     |          |          |  |  |  |      |          |          |          |  |  |      |          |          |          |          |  |      |          |          |          |          |          |     |          |          |          |          |          |      |          |          |          |          |          |      |          |          |          |          |          |  |   |   |   |  |  |     |          |  |  |  |  |      |          |          |  |  |  |      |          |          |          |  |  |
|  <p>3. -6506.4018815 +8.0 C<sub>1</sub></p> | <table border="1"> <thead> <tr> <th></th> <th>1</th> <th>2</th> <th>3</th> <th>4</th> <th>5</th> </tr> </thead> <tbody> <tr><td>1 B</td><td>0.000000</td><td></td><td></td><td></td><td></td></tr> <tr><td>2 B</td><td>2.735564</td><td>0.000000</td><td></td><td></td><td></td></tr> <tr><td>3 B</td><td>1.846968</td><td>1.737896</td><td>0.000000</td><td></td><td></td></tr> <tr><td>4 Co</td><td>3.008404</td><td>2.195621</td><td>3.002216</td><td>0.000000</td><td></td></tr> <tr><td>5 Se</td><td>2.036514</td><td>2.657243</td><td>3.073572</td><td>2.378506</td><td>0.000000</td></tr> <tr><td>6 B</td><td>1.774385</td><td>1.720556</td><td>1.714315</td><td>3.089769</td><td>2.013605</td></tr> <tr><td>7 Se</td><td>2.091534</td><td>3.002865</td><td>2.228699</td><td>2.388899</td><td>3.193620</td></tr> <tr><td>8 B</td><td>2.961731</td><td>1.664081</td><td>1.788452</td><td>2.042141</td><td>3.484004</td></tr> <tr><td></td><td>6</td><td>7</td><td>8</td><td></td><td></td></tr> <tr><td>6 B</td><td>0.000000</td><td></td><td></td><td></td><td></td></tr> <tr><td>7 Se</td><td>3.231277</td><td>0.000000</td><td></td><td></td><td></td></tr> <tr><td>8 B</td><td>2.890776</td><td>2.028476</td><td>0.000000</td><td></td><td></td></tr> </tbody> </table>  |          | 1        | 2        | 3        | 4 | 5 | 1 B  | 0.000000 |  |  |  |  | 2 B | 2.735564 | 0.000000 |  |  |  | 3 B  | 1.846968 | 1.737896 | 0.000000 |  |  | 4 Co | 3.008404 | 2.195621 | 3.002216 | 0.000000 |  | 5 Se | 2.036514 | 2.657243 | 3.073572 | 2.378506 | 0.000000 | 6 B | 1.774385 | 1.720556 | 1.714315 | 3.089769 | 2.013605 | 7 Se | 2.091534 | 3.002865 | 2.228699 | 2.388899 | 3.193620 | 8 B  | 2.961731 | 1.664081 | 1.788452 | 2.042141 | 3.484004 |  | 6 | 7 | 8 |  |  | 6 B | 0.000000 |  |  |  |  | 7 Se | 3.231277 | 0.000000 |  |  |  | 8 B  | 2.890776 | 2.028476 | 0.000000 |  |  |
|                                                                                                                                | 1                                                                                                                                                                                                                                                                                                                                                                                                                                                                                                                                                                                                                                                                                                                                                                                                                                                                                                                                                                                                                                                                                                                                                                                                                                                                                  | 2        | 3        | 4        | 5        |   |   |      |          |  |  |  |  |     |          |          |  |  |  |      |          |          |          |  |  |      |          |          |          |          |  |      |          |          |          |          |          |     |          |          |          |          |          |      |          |          |          |          |          |      |          |          |          |          |          |  |   |   |   |  |  |     |          |  |  |  |  |      |          |          |  |  |  |      |          |          |          |  |  |
| 1 B                                                                                                                            | 0.000000                                                                                                                                                                                                                                                                                                                                                                                                                                                                                                                                                                                                                                                                                                                                                                                                                                                                                                                                                                                                                                                                                                                                                                                                                                                                           |          |          |          |          |   |   |      |          |  |  |  |  |     |          |          |  |  |  |      |          |          |          |  |  |      |          |          |          |          |  |      |          |          |          |          |          |     |          |          |          |          |          |      |          |          |          |          |          |      |          |          |          |          |          |  |   |   |   |  |  |     |          |  |  |  |  |      |          |          |  |  |  |      |          |          |          |  |  |
| 2 B                                                                                                                            | 2.735564                                                                                                                                                                                                                                                                                                                                                                                                                                                                                                                                                                                                                                                                                                                                                                                                                                                                                                                                                                                                                                                                                                                                                                                                                                                                           | 0.000000 |          |          |          |   |   |      |          |  |  |  |  |     |          |          |  |  |  |      |          |          |          |  |  |      |          |          |          |          |  |      |          |          |          |          |          |     |          |          |          |          |          |      |          |          |          |          |          |      |          |          |          |          |          |  |   |   |   |  |  |     |          |  |  |  |  |      |          |          |  |  |  |      |          |          |          |  |  |
| 3 B                                                                                                                            | 1.846968                                                                                                                                                                                                                                                                                                                                                                                                                                                                                                                                                                                                                                                                                                                                                                                                                                                                                                                                                                                                                                                                                                                                                                                                                                                                           | 1.737896 | 0.000000 |          |          |   |   |      |          |  |  |  |  |     |          |          |  |  |  |      |          |          |          |  |  |      |          |          |          |          |  |      |          |          |          |          |          |     |          |          |          |          |          |      |          |          |          |          |          |      |          |          |          |          |          |  |   |   |   |  |  |     |          |  |  |  |  |      |          |          |  |  |  |      |          |          |          |  |  |
| 4 Co                                                                                                                           | 3.008404                                                                                                                                                                                                                                                                                                                                                                                                                                                                                                                                                                                                                                                                                                                                                                                                                                                                                                                                                                                                                                                                                                                                                                                                                                                                           | 2.195621 | 3.002216 | 0.000000 |          |   |   |      |          |  |  |  |  |     |          |          |  |  |  |      |          |          |          |  |  |      |          |          |          |          |  |      |          |          |          |          |          |     |          |          |          |          |          |      |          |          |          |          |          |      |          |          |          |          |          |  |   |   |   |  |  |     |          |  |  |  |  |      |          |          |  |  |  |      |          |          |          |  |  |
| 5 Se                                                                                                                           | 2.036514                                                                                                                                                                                                                                                                                                                                                                                                                                                                                                                                                                                                                                                                                                                                                                                                                                                                                                                                                                                                                                                                                                                                                                                                                                                                           | 2.657243 | 3.073572 | 2.378506 | 0.000000 |   |   |      |          |  |  |  |  |     |          |          |  |  |  |      |          |          |          |  |  |      |          |          |          |          |  |      |          |          |          |          |          |     |          |          |          |          |          |      |          |          |          |          |          |      |          |          |          |          |          |  |   |   |   |  |  |     |          |  |  |  |  |      |          |          |  |  |  |      |          |          |          |  |  |
| 6 B                                                                                                                            | 1.774385                                                                                                                                                                                                                                                                                                                                                                                                                                                                                                                                                                                                                                                                                                                                                                                                                                                                                                                                                                                                                                                                                                                                                                                                                                                                           | 1.720556 | 1.714315 | 3.089769 | 2.013605 |   |   |      |          |  |  |  |  |     |          |          |  |  |  |      |          |          |          |  |  |      |          |          |          |          |  |      |          |          |          |          |          |     |          |          |          |          |          |      |          |          |          |          |          |      |          |          |          |          |          |  |   |   |   |  |  |     |          |  |  |  |  |      |          |          |  |  |  |      |          |          |          |  |  |
| 7 Se                                                                                                                           | 2.091534                                                                                                                                                                                                                                                                                                                                                                                                                                                                                                                                                                                                                                                                                                                                                                                                                                                                                                                                                                                                                                                                                                                                                                                                                                                                           | 3.002865 | 2.228699 | 2.388899 | 3.193620 |   |   |      |          |  |  |  |  |     |          |          |  |  |  |      |          |          |          |  |  |      |          |          |          |          |  |      |          |          |          |          |          |     |          |          |          |          |          |      |          |          |          |          |          |      |          |          |          |          |          |  |   |   |   |  |  |     |          |  |  |  |  |      |          |          |  |  |  |      |          |          |          |  |  |
| 8 B                                                                                                                            | 2.961731                                                                                                                                                                                                                                                                                                                                                                                                                                                                                                                                                                                                                                                                                                                                                                                                                                                                                                                                                                                                                                                                                                                                                                                                                                                                           | 1.664081 | 1.788452 | 2.042141 | 3.484004 |   |   |      |          |  |  |  |  |     |          |          |  |  |  |      |          |          |          |  |  |      |          |          |          |          |  |      |          |          |          |          |          |     |          |          |          |          |          |      |          |          |          |          |          |      |          |          |          |          |          |  |   |   |   |  |  |     |          |  |  |  |  |      |          |          |  |  |  |      |          |          |          |  |  |
|                                                                                                                                | 6                                                                                                                                                                                                                                                                                                                                                                                                                                                                                                                                                                                                                                                                                                                                                                                                                                                                                                                                                                                                                                                                                                                                                                                                                                                                                  | 7        | 8        |          |          |   |   |      |          |  |  |  |  |     |          |          |  |  |  |      |          |          |          |  |  |      |          |          |          |          |  |      |          |          |          |          |          |     |          |          |          |          |          |      |          |          |          |          |          |      |          |          |          |          |          |  |   |   |   |  |  |     |          |  |  |  |  |      |          |          |  |  |  |      |          |          |          |  |  |
| 6 B                                                                                                                            | 0.000000                                                                                                                                                                                                                                                                                                                                                                                                                                                                                                                                                                                                                                                                                                                                                                                                                                                                                                                                                                                                                                                                                                                                                                                                                                                                           |          |          |          |          |   |   |      |          |  |  |  |  |     |          |          |  |  |  |      |          |          |          |  |  |      |          |          |          |          |  |      |          |          |          |          |          |     |          |          |          |          |          |      |          |          |          |          |          |      |          |          |          |          |          |  |   |   |   |  |  |     |          |  |  |  |  |      |          |          |  |  |  |      |          |          |          |  |  |
| 7 Se                                                                                                                           | 3.231277                                                                                                                                                                                                                                                                                                                                                                                                                                                                                                                                                                                                                                                                                                                                                                                                                                                                                                                                                                                                                                                                                                                                                                                                                                                                           | 0.000000 |          |          |          |   |   |      |          |  |  |  |  |     |          |          |  |  |  |      |          |          |          |  |  |      |          |          |          |          |  |      |          |          |          |          |          |     |          |          |          |          |          |      |          |          |          |          |          |      |          |          |          |          |          |  |   |   |   |  |  |     |          |  |  |  |  |      |          |          |  |  |  |      |          |          |          |  |  |
| 8 B                                                                                                                            | 2.890776                                                                                                                                                                                                                                                                                                                                                                                                                                                                                                                                                                                                                                                                                                                                                                                                                                                                                                                                                                                                                                                                                                                                                                                                                                                                           | 2.028476 | 0.000000 |          |          |   |   |      |          |  |  |  |  |     |          |          |  |  |  |      |          |          |          |  |  |      |          |          |          |          |  |      |          |          |          |          |          |     |          |          |          |          |          |      |          |          |          |          |          |      |          |          |          |          |          |  |   |   |   |  |  |     |          |  |  |  |  |      |          |          |  |  |  |      |          |          |          |  |  |

| 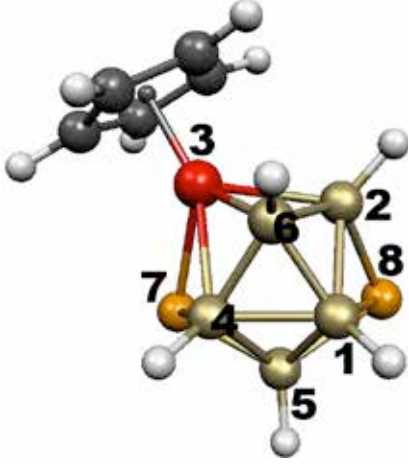 <p>4. -6506.3971435 +11.0 C<sub>1</sub></p>   | <table border="1"> <thead> <tr> <th></th> <th>1</th> <th>2</th> <th>3</th> <th>4</th> <th>5</th> </tr> </thead> <tbody> <tr> <td>1 B</td> <td>0.000000</td> <td></td> <td></td> <td></td> <td></td> </tr> <tr> <td>2 B</td> <td>1.879198</td> <td>0.000000</td> <td></td> <td></td> <td></td> </tr> <tr> <td>3 Co</td> <td>3.045209</td> <td>2.227447</td> <td>0.000000</td> <td></td> <td></td> </tr> <tr> <td>4 B</td> <td>1.840538</td> <td>2.688450</td> <td>2.203246</td> <td>0.000000</td> <td></td> </tr> <tr> <td>5 B</td> <td>1.839146</td> <td>2.807352</td> <td>3.180580</td> <td>1.871647</td> <td>0.000000</td> </tr> <tr> <td>6 B</td> <td>1.723583</td> <td>1.689726</td> <td>1.948784</td> <td>1.737928</td> <td>2.927452</td> </tr> <tr> <td>7 Se</td> <td>3.218342</td> <td>3.358964</td> <td>2.311389</td> <td>2.040404</td> <td>2.003495</td> </tr> <tr> <td>8 Se</td> <td>2.075509</td> <td>1.985136</td> <td>3.547779</td> <td>3.224485</td> <td>2.032339</td> </tr> <tr> <td></td> <td>6</td> <td>7</td> <td>8</td> <td></td> <td></td> </tr> <tr> <td>6 B</td> <td>0.000000</td> <td></td> <td></td> <td></td> <td></td> </tr> <tr> <td>7 Se</td> <td>3.254976</td> <td>0.000000</td> <td></td> <td></td> <td></td> </tr> <tr> <td>8 Se</td> <td>3.177628</td> <td>3.343136</td> <td>0.000000</td> <td></td> <td></td> </tr> </tbody> </table> |          | 1        | 2        | 3        | 4 | 5 | 1 B  | 0.000000 |  |  |  |  | 2 B | 1.879198 | 0.000000 |  |  |  | 3 Co | 3.045209 | 2.227447 | 0.000000 |  |  | 4 B | 1.840538 | 2.688450 | 2.203246 | 0.000000 |  | 5 B  | 1.839146 | 2.807352 | 3.180580 | 1.871647 | 0.000000 | 6 B  | 1.723583 | 1.689726 | 1.948784 | 1.737928 | 2.927452 | 7 Se | 3.218342 | 3.358964 | 2.311389 | 2.040404 | 2.003495 | 8 Se | 2.075509 | 1.985136 | 3.547779 | 3.224485 | 2.032339 |  | 6 | 7 | 8 |  |  | 6 B  | 0.000000 |  |  |  |  | 7 Se | 3.254976 | 0.000000 |  |  |  | 8 Se | 3.177628 | 3.343136 | 0.000000 |  |  |
|---------------------------------------------------------------------------------------------------------------------------------|------------------------------------------------------------------------------------------------------------------------------------------------------------------------------------------------------------------------------------------------------------------------------------------------------------------------------------------------------------------------------------------------------------------------------------------------------------------------------------------------------------------------------------------------------------------------------------------------------------------------------------------------------------------------------------------------------------------------------------------------------------------------------------------------------------------------------------------------------------------------------------------------------------------------------------------------------------------------------------------------------------------------------------------------------------------------------------------------------------------------------------------------------------------------------------------------------------------------------------------------------------------------------------------------------------------------------------------------------------------------|----------|----------|----------|----------|---|---|------|----------|--|--|--|--|-----|----------|----------|--|--|--|------|----------|----------|----------|--|--|-----|----------|----------|----------|----------|--|------|----------|----------|----------|----------|----------|------|----------|----------|----------|----------|----------|------|----------|----------|----------|----------|----------|------|----------|----------|----------|----------|----------|--|---|---|---|--|--|------|----------|--|--|--|--|------|----------|----------|--|--|--|------|----------|----------|----------|--|--|
|                                                                                                                                 | 1                                                                                                                                                                                                                                                                                                                                                                                                                                                                                                                                                                                                                                                                                                                                                                                                                                                                                                                                                                                                                                                                                                                                                                                                                                                                                                                                                                      | 2        | 3        | 4        | 5        |   |   |      |          |  |  |  |  |     |          |          |  |  |  |      |          |          |          |  |  |     |          |          |          |          |  |      |          |          |          |          |          |      |          |          |          |          |          |      |          |          |          |          |          |      |          |          |          |          |          |  |   |   |   |  |  |      |          |  |  |  |  |      |          |          |  |  |  |      |          |          |          |  |  |
| 1 B                                                                                                                             | 0.000000                                                                                                                                                                                                                                                                                                                                                                                                                                                                                                                                                                                                                                                                                                                                                                                                                                                                                                                                                                                                                                                                                                                                                                                                                                                                                                                                                               |          |          |          |          |   |   |      |          |  |  |  |  |     |          |          |  |  |  |      |          |          |          |  |  |     |          |          |          |          |  |      |          |          |          |          |          |      |          |          |          |          |          |      |          |          |          |          |          |      |          |          |          |          |          |  |   |   |   |  |  |      |          |  |  |  |  |      |          |          |  |  |  |      |          |          |          |  |  |
| 2 B                                                                                                                             | 1.879198                                                                                                                                                                                                                                                                                                                                                                                                                                                                                                                                                                                                                                                                                                                                                                                                                                                                                                                                                                                                                                                                                                                                                                                                                                                                                                                                                               | 0.000000 |          |          |          |   |   |      |          |  |  |  |  |     |          |          |  |  |  |      |          |          |          |  |  |     |          |          |          |          |  |      |          |          |          |          |          |      |          |          |          |          |          |      |          |          |          |          |          |      |          |          |          |          |          |  |   |   |   |  |  |      |          |  |  |  |  |      |          |          |  |  |  |      |          |          |          |  |  |
| 3 Co                                                                                                                            | 3.045209                                                                                                                                                                                                                                                                                                                                                                                                                                                                                                                                                                                                                                                                                                                                                                                                                                                                                                                                                                                                                                                                                                                                                                                                                                                                                                                                                               | 2.227447 | 0.000000 |          |          |   |   |      |          |  |  |  |  |     |          |          |  |  |  |      |          |          |          |  |  |     |          |          |          |          |  |      |          |          |          |          |          |      |          |          |          |          |          |      |          |          |          |          |          |      |          |          |          |          |          |  |   |   |   |  |  |      |          |  |  |  |  |      |          |          |  |  |  |      |          |          |          |  |  |
| 4 B                                                                                                                             | 1.840538                                                                                                                                                                                                                                                                                                                                                                                                                                                                                                                                                                                                                                                                                                                                                                                                                                                                                                                                                                                                                                                                                                                                                                                                                                                                                                                                                               | 2.688450 | 2.203246 | 0.000000 |          |   |   |      |          |  |  |  |  |     |          |          |  |  |  |      |          |          |          |  |  |     |          |          |          |          |  |      |          |          |          |          |          |      |          |          |          |          |          |      |          |          |          |          |          |      |          |          |          |          |          |  |   |   |   |  |  |      |          |  |  |  |  |      |          |          |  |  |  |      |          |          |          |  |  |
| 5 B                                                                                                                             | 1.839146                                                                                                                                                                                                                                                                                                                                                                                                                                                                                                                                                                                                                                                                                                                                                                                                                                                                                                                                                                                                                                                                                                                                                                                                                                                                                                                                                               | 2.807352 | 3.180580 | 1.871647 | 0.000000 |   |   |      |          |  |  |  |  |     |          |          |  |  |  |      |          |          |          |  |  |     |          |          |          |          |  |      |          |          |          |          |          |      |          |          |          |          |          |      |          |          |          |          |          |      |          |          |          |          |          |  |   |   |   |  |  |      |          |  |  |  |  |      |          |          |  |  |  |      |          |          |          |  |  |
| 6 B                                                                                                                             | 1.723583                                                                                                                                                                                                                                                                                                                                                                                                                                                                                                                                                                                                                                                                                                                                                                                                                                                                                                                                                                                                                                                                                                                                                                                                                                                                                                                                                               | 1.689726 | 1.948784 | 1.737928 | 2.927452 |   |   |      |          |  |  |  |  |     |          |          |  |  |  |      |          |          |          |  |  |     |          |          |          |          |  |      |          |          |          |          |          |      |          |          |          |          |          |      |          |          |          |          |          |      |          |          |          |          |          |  |   |   |   |  |  |      |          |  |  |  |  |      |          |          |  |  |  |      |          |          |          |  |  |
| 7 Se                                                                                                                            | 3.218342                                                                                                                                                                                                                                                                                                                                                                                                                                                                                                                                                                                                                                                                                                                                                                                                                                                                                                                                                                                                                                                                                                                                                                                                                                                                                                                                                               | 3.358964 | 2.311389 | 2.040404 | 2.003495 |   |   |      |          |  |  |  |  |     |          |          |  |  |  |      |          |          |          |  |  |     |          |          |          |          |  |      |          |          |          |          |          |      |          |          |          |          |          |      |          |          |          |          |          |      |          |          |          |          |          |  |   |   |   |  |  |      |          |  |  |  |  |      |          |          |  |  |  |      |          |          |          |  |  |
| 8 Se                                                                                                                            | 2.075509                                                                                                                                                                                                                                                                                                                                                                                                                                                                                                                                                                                                                                                                                                                                                                                                                                                                                                                                                                                                                                                                                                                                                                                                                                                                                                                                                               | 1.985136 | 3.547779 | 3.224485 | 2.032339 |   |   |      |          |  |  |  |  |     |          |          |  |  |  |      |          |          |          |  |  |     |          |          |          |          |  |      |          |          |          |          |          |      |          |          |          |          |          |      |          |          |          |          |          |      |          |          |          |          |          |  |   |   |   |  |  |      |          |  |  |  |  |      |          |          |  |  |  |      |          |          |          |  |  |
|                                                                                                                                 | 6                                                                                                                                                                                                                                                                                                                                                                                                                                                                                                                                                                                                                                                                                                                                                                                                                                                                                                                                                                                                                                                                                                                                                                                                                                                                                                                                                                      | 7        | 8        |          |          |   |   |      |          |  |  |  |  |     |          |          |  |  |  |      |          |          |          |  |  |     |          |          |          |          |  |      |          |          |          |          |          |      |          |          |          |          |          |      |          |          |          |          |          |      |          |          |          |          |          |  |   |   |   |  |  |      |          |  |  |  |  |      |          |          |  |  |  |      |          |          |          |  |  |
| 6 B                                                                                                                             | 0.000000                                                                                                                                                                                                                                                                                                                                                                                                                                                                                                                                                                                                                                                                                                                                                                                                                                                                                                                                                                                                                                                                                                                                                                                                                                                                                                                                                               |          |          |          |          |   |   |      |          |  |  |  |  |     |          |          |  |  |  |      |          |          |          |  |  |     |          |          |          |          |  |      |          |          |          |          |          |      |          |          |          |          |          |      |          |          |          |          |          |      |          |          |          |          |          |  |   |   |   |  |  |      |          |  |  |  |  |      |          |          |  |  |  |      |          |          |          |  |  |
| 7 Se                                                                                                                            | 3.254976                                                                                                                                                                                                                                                                                                                                                                                                                                                                                                                                                                                                                                                                                                                                                                                                                                                                                                                                                                                                                                                                                                                                                                                                                                                                                                                                                               | 0.000000 |          |          |          |   |   |      |          |  |  |  |  |     |          |          |  |  |  |      |          |          |          |  |  |     |          |          |          |          |  |      |          |          |          |          |          |      |          |          |          |          |          |      |          |          |          |          |          |      |          |          |          |          |          |  |   |   |   |  |  |      |          |  |  |  |  |      |          |          |  |  |  |      |          |          |          |  |  |
| 8 Se                                                                                                                            | 3.177628                                                                                                                                                                                                                                                                                                                                                                                                                                                                                                                                                                                                                                                                                                                                                                                                                                                                                                                                                                                                                                                                                                                                                                                                                                                                                                                                                               | 3.343136 | 0.000000 |          |          |   |   |      |          |  |  |  |  |     |          |          |  |  |  |      |          |          |          |  |  |     |          |          |          |          |  |      |          |          |          |          |          |      |          |          |          |          |          |      |          |          |          |          |          |      |          |          |          |          |          |  |   |   |   |  |  |      |          |  |  |  |  |      |          |          |  |  |  |      |          |          |          |  |  |
|  <p>5. -6506.3966242 +11.3 C<sub>s</sub></p>  | <table border="1"> <thead> <tr> <th></th> <th>1</th> <th>2</th> <th>3</th> <th>4</th> <th>5</th> </tr> </thead> <tbody> <tr> <td>1 B</td> <td>0.000000</td> <td></td> <td></td> <td></td> <td></td> </tr> <tr> <td>2 B</td> <td>1.766036</td> <td>0.000000</td> <td></td> <td></td> <td></td> </tr> <tr> <td>3 Se</td> <td>2.098011</td> <td>3.005529</td> <td>0.000000</td> <td></td> <td></td> </tr> <tr> <td>4 B</td> <td>1.711281</td> <td>1.766031</td> <td>3.152142</td> <td>0.000000</td> <td></td> </tr> <tr> <td>5 B</td> <td>1.776057</td> <td>1.728623</td> <td>1.950883</td> <td>2.915531</td> <td>0.000000</td> </tr> <tr> <td>6 Se</td> <td>3.152150</td> <td>3.005470</td> <td>3.234075</td> <td>2.097994</td> <td>3.729443</td> </tr> <tr> <td>7 B</td> <td>2.915569</td> <td>1.728612</td> <td>3.729529</td> <td>1.776092</td> <td>3.123970</td> </tr> <tr> <td>8 Co</td> <td>2.904900</td> <td>2.199425</td> <td>2.408539</td> <td>2.904924</td> <td>2.151475</td> </tr> <tr> <td></td> <td>6</td> <td>7</td> <td>8</td> <td></td> <td></td> </tr> <tr> <td>6 Se</td> <td>0.000000</td> <td></td> <td></td> <td></td> <td></td> </tr> <tr> <td>7 B</td> <td>1.950867</td> <td>0.000000</td> <td></td> <td></td> <td></td> </tr> <tr> <td>8 Co</td> <td>2.408547</td> <td>2.151588</td> <td>0.000000</td> <td></td> <td></td> </tr> </tbody> </table> |          | 1        | 2        | 3        | 4 | 5 | 1 B  | 0.000000 |  |  |  |  | 2 B | 1.766036 | 0.000000 |  |  |  | 3 Se | 2.098011 | 3.005529 | 0.000000 |  |  | 4 B | 1.711281 | 1.766031 | 3.152142 | 0.000000 |  | 5 B  | 1.776057 | 1.728623 | 1.950883 | 2.915531 | 0.000000 | 6 Se | 3.152150 | 3.005470 | 3.234075 | 2.097994 | 3.729443 | 7 B  | 2.915569 | 1.728612 | 3.729529 | 1.776092 | 3.123970 | 8 Co | 2.904900 | 2.199425 | 2.408539 | 2.904924 | 2.151475 |  | 6 | 7 | 8 |  |  | 6 Se | 0.000000 |  |  |  |  | 7 B  | 1.950867 | 0.000000 |  |  |  | 8 Co | 2.408547 | 2.151588 | 0.000000 |  |  |
|                                                                                                                                 | 1                                                                                                                                                                                                                                                                                                                                                                                                                                                                                                                                                                                                                                                                                                                                                                                                                                                                                                                                                                                                                                                                                                                                                                                                                                                                                                                                                                      | 2        | 3        | 4        | 5        |   |   |      |          |  |  |  |  |     |          |          |  |  |  |      |          |          |          |  |  |     |          |          |          |          |  |      |          |          |          |          |          |      |          |          |          |          |          |      |          |          |          |          |          |      |          |          |          |          |          |  |   |   |   |  |  |      |          |  |  |  |  |      |          |          |  |  |  |      |          |          |          |  |  |
| 1 B                                                                                                                             | 0.000000                                                                                                                                                                                                                                                                                                                                                                                                                                                                                                                                                                                                                                                                                                                                                                                                                                                                                                                                                                                                                                                                                                                                                                                                                                                                                                                                                               |          |          |          |          |   |   |      |          |  |  |  |  |     |          |          |  |  |  |      |          |          |          |  |  |     |          |          |          |          |  |      |          |          |          |          |          |      |          |          |          |          |          |      |          |          |          |          |          |      |          |          |          |          |          |  |   |   |   |  |  |      |          |  |  |  |  |      |          |          |  |  |  |      |          |          |          |  |  |
| 2 B                                                                                                                             | 1.766036                                                                                                                                                                                                                                                                                                                                                                                                                                                                                                                                                                                                                                                                                                                                                                                                                                                                                                                                                                                                                                                                                                                                                                                                                                                                                                                                                               | 0.000000 |          |          |          |   |   |      |          |  |  |  |  |     |          |          |  |  |  |      |          |          |          |  |  |     |          |          |          |          |  |      |          |          |          |          |          |      |          |          |          |          |          |      |          |          |          |          |          |      |          |          |          |          |          |  |   |   |   |  |  |      |          |  |  |  |  |      |          |          |  |  |  |      |          |          |          |  |  |
| 3 Se                                                                                                                            | 2.098011                                                                                                                                                                                                                                                                                                                                                                                                                                                                                                                                                                                                                                                                                                                                                                                                                                                                                                                                                                                                                                                                                                                                                                                                                                                                                                                                                               | 3.005529 | 0.000000 |          |          |   |   |      |          |  |  |  |  |     |          |          |  |  |  |      |          |          |          |  |  |     |          |          |          |          |  |      |          |          |          |          |          |      |          |          |          |          |          |      |          |          |          |          |          |      |          |          |          |          |          |  |   |   |   |  |  |      |          |  |  |  |  |      |          |          |  |  |  |      |          |          |          |  |  |
| 4 B                                                                                                                             | 1.711281                                                                                                                                                                                                                                                                                                                                                                                                                                                                                                                                                                                                                                                                                                                                                                                                                                                                                                                                                                                                                                                                                                                                                                                                                                                                                                                                                               | 1.766031 | 3.152142 | 0.000000 |          |   |   |      |          |  |  |  |  |     |          |          |  |  |  |      |          |          |          |  |  |     |          |          |          |          |  |      |          |          |          |          |          |      |          |          |          |          |          |      |          |          |          |          |          |      |          |          |          |          |          |  |   |   |   |  |  |      |          |  |  |  |  |      |          |          |  |  |  |      |          |          |          |  |  |
| 5 B                                                                                                                             | 1.776057                                                                                                                                                                                                                                                                                                                                                                                                                                                                                                                                                                                                                                                                                                                                                                                                                                                                                                                                                                                                                                                                                                                                                                                                                                                                                                                                                               | 1.728623 | 1.950883 | 2.915531 | 0.000000 |   |   |      |          |  |  |  |  |     |          |          |  |  |  |      |          |          |          |  |  |     |          |          |          |          |  |      |          |          |          |          |          |      |          |          |          |          |          |      |          |          |          |          |          |      |          |          |          |          |          |  |   |   |   |  |  |      |          |  |  |  |  |      |          |          |  |  |  |      |          |          |          |  |  |
| 6 Se                                                                                                                            | 3.152150                                                                                                                                                                                                                                                                                                                                                                                                                                                                                                                                                                                                                                                                                                                                                                                                                                                                                                                                                                                                                                                                                                                                                                                                                                                                                                                                                               | 3.005470 | 3.234075 | 2.097994 | 3.729443 |   |   |      |          |  |  |  |  |     |          |          |  |  |  |      |          |          |          |  |  |     |          |          |          |          |  |      |          |          |          |          |          |      |          |          |          |          |          |      |          |          |          |          |          |      |          |          |          |          |          |  |   |   |   |  |  |      |          |  |  |  |  |      |          |          |  |  |  |      |          |          |          |  |  |
| 7 B                                                                                                                             | 2.915569                                                                                                                                                                                                                                                                                                                                                                                                                                                                                                                                                                                                                                                                                                                                                                                                                                                                                                                                                                                                                                                                                                                                                                                                                                                                                                                                                               | 1.728612 | 3.729529 | 1.776092 | 3.123970 |   |   |      |          |  |  |  |  |     |          |          |  |  |  |      |          |          |          |  |  |     |          |          |          |          |  |      |          |          |          |          |          |      |          |          |          |          |          |      |          |          |          |          |          |      |          |          |          |          |          |  |   |   |   |  |  |      |          |  |  |  |  |      |          |          |  |  |  |      |          |          |          |  |  |
| 8 Co                                                                                                                            | 2.904900                                                                                                                                                                                                                                                                                                                                                                                                                                                                                                                                                                                                                                                                                                                                                                                                                                                                                                                                                                                                                                                                                                                                                                                                                                                                                                                                                               | 2.199425 | 2.408539 | 2.904924 | 2.151475 |   |   |      |          |  |  |  |  |     |          |          |  |  |  |      |          |          |          |  |  |     |          |          |          |          |  |      |          |          |          |          |          |      |          |          |          |          |          |      |          |          |          |          |          |      |          |          |          |          |          |  |   |   |   |  |  |      |          |  |  |  |  |      |          |          |  |  |  |      |          |          |          |  |  |
|                                                                                                                                 | 6                                                                                                                                                                                                                                                                                                                                                                                                                                                                                                                                                                                                                                                                                                                                                                                                                                                                                                                                                                                                                                                                                                                                                                                                                                                                                                                                                                      | 7        | 8        |          |          |   |   |      |          |  |  |  |  |     |          |          |  |  |  |      |          |          |          |  |  |     |          |          |          |          |  |      |          |          |          |          |          |      |          |          |          |          |          |      |          |          |          |          |          |      |          |          |          |          |          |  |   |   |   |  |  |      |          |  |  |  |  |      |          |          |  |  |  |      |          |          |          |  |  |
| 6 Se                                                                                                                            | 0.000000                                                                                                                                                                                                                                                                                                                                                                                                                                                                                                                                                                                                                                                                                                                                                                                                                                                                                                                                                                                                                                                                                                                                                                                                                                                                                                                                                               |          |          |          |          |   |   |      |          |  |  |  |  |     |          |          |  |  |  |      |          |          |          |  |  |     |          |          |          |          |  |      |          |          |          |          |          |      |          |          |          |          |          |      |          |          |          |          |          |      |          |          |          |          |          |  |   |   |   |  |  |      |          |  |  |  |  |      |          |          |  |  |  |      |          |          |          |  |  |
| 7 B                                                                                                                             | 1.950867                                                                                                                                                                                                                                                                                                                                                                                                                                                                                                                                                                                                                                                                                                                                                                                                                                                                                                                                                                                                                                                                                                                                                                                                                                                                                                                                                               | 0.000000 |          |          |          |   |   |      |          |  |  |  |  |     |          |          |  |  |  |      |          |          |          |  |  |     |          |          |          |          |  |      |          |          |          |          |          |      |          |          |          |          |          |      |          |          |          |          |          |      |          |          |          |          |          |  |   |   |   |  |  |      |          |  |  |  |  |      |          |          |  |  |  |      |          |          |          |  |  |
| 8 Co                                                                                                                            | 2.408547                                                                                                                                                                                                                                                                                                                                                                                                                                                                                                                                                                                                                                                                                                                                                                                                                                                                                                                                                                                                                                                                                                                                                                                                                                                                                                                                                               | 2.151588 | 0.000000 |          |          |   |   |      |          |  |  |  |  |     |          |          |  |  |  |      |          |          |          |  |  |     |          |          |          |          |  |      |          |          |          |          |          |      |          |          |          |          |          |      |          |          |          |          |          |      |          |          |          |          |          |  |   |   |   |  |  |      |          |  |  |  |  |      |          |          |  |  |  |      |          |          |          |  |  |
|  <p>6. -6506.3962263 +11.5 C<sub>s</sub></p> | <table border="1"> <thead> <tr> <th></th> <th>1</th> <th>2</th> <th>3</th> <th>4</th> <th>5</th> </tr> </thead> <tbody> <tr> <td>1 Se</td> <td>0.000000</td> <td></td> <td></td> <td></td> <td></td> </tr> <tr> <td>2 B</td> <td>1.974546</td> <td>0.000000</td> <td></td> <td></td> <td></td> </tr> <tr> <td>3 B</td> <td>2.045924</td> <td>2.857413</td> <td>0.000000</td> <td></td> <td></td> </tr> <tr> <td>4 B</td> <td>3.217193</td> <td>2.793927</td> <td>1.810654</td> <td>0.000000</td> <td></td> </tr> <tr> <td>5 Se</td> <td>3.321253</td> <td>3.451048</td> <td>2.045904</td> <td>2.126992</td> <td>0.000000</td> </tr> <tr> <td>6 B</td> <td>2.126942</td> <td>1.890543</td> <td>1.810662</td> <td>1.754154</td> <td>3.217083</td> </tr> <tr> <td>7 Co</td> <td>3.480150</td> <td>1.911170</td> <td>3.236987</td> <td>2.012915</td> <td>3.480117</td> </tr> <tr> <td>8 B</td> <td>3.451874</td> <td>2.412880</td> <td>2.857604</td> <td>1.890239</td> <td>1.974529</td> </tr> <tr> <td></td> <td>6</td> <td>7</td> <td>8</td> <td></td> <td></td> </tr> <tr> <td>6 B</td> <td>0.000000</td> <td></td> <td></td> <td></td> <td></td> </tr> <tr> <td>7 Co</td> <td>2.012789</td> <td>0.000000</td> <td></td> <td></td> <td></td> </tr> <tr> <td>8 B</td> <td>2.793968</td> <td>1.911087</td> <td>0.000000</td> <td></td> <td></td> </tr> </tbody> </table>  |          | 1        | 2        | 3        | 4 | 5 | 1 Se | 0.000000 |  |  |  |  | 2 B | 1.974546 | 0.000000 |  |  |  | 3 B  | 2.045924 | 2.857413 | 0.000000 |  |  | 4 B | 3.217193 | 2.793927 | 1.810654 | 0.000000 |  | 5 Se | 3.321253 | 3.451048 | 2.045904 | 2.126992 | 0.000000 | 6 B  | 2.126942 | 1.890543 | 1.810662 | 1.754154 | 3.217083 | 7 Co | 3.480150 | 1.911170 | 3.236987 | 2.012915 | 3.480117 | 8 B  | 3.451874 | 2.412880 | 2.857604 | 1.890239 | 1.974529 |  | 6 | 7 | 8 |  |  | 6 B  | 0.000000 |  |  |  |  | 7 Co | 2.012789 | 0.000000 |  |  |  | 8 B  | 2.793968 | 1.911087 | 0.000000 |  |  |
|                                                                                                                                 | 1                                                                                                                                                                                                                                                                                                                                                                                                                                                                                                                                                                                                                                                                                                                                                                                                                                                                                                                                                                                                                                                                                                                                                                                                                                                                                                                                                                      | 2        | 3        | 4        | 5        |   |   |      |          |  |  |  |  |     |          |          |  |  |  |      |          |          |          |  |  |     |          |          |          |          |  |      |          |          |          |          |          |      |          |          |          |          |          |      |          |          |          |          |          |      |          |          |          |          |          |  |   |   |   |  |  |      |          |  |  |  |  |      |          |          |  |  |  |      |          |          |          |  |  |
| 1 Se                                                                                                                            | 0.000000                                                                                                                                                                                                                                                                                                                                                                                                                                                                                                                                                                                                                                                                                                                                                                                                                                                                                                                                                                                                                                                                                                                                                                                                                                                                                                                                                               |          |          |          |          |   |   |      |          |  |  |  |  |     |          |          |  |  |  |      |          |          |          |  |  |     |          |          |          |          |  |      |          |          |          |          |          |      |          |          |          |          |          |      |          |          |          |          |          |      |          |          |          |          |          |  |   |   |   |  |  |      |          |  |  |  |  |      |          |          |  |  |  |      |          |          |          |  |  |
| 2 B                                                                                                                             | 1.974546                                                                                                                                                                                                                                                                                                                                                                                                                                                                                                                                                                                                                                                                                                                                                                                                                                                                                                                                                                                                                                                                                                                                                                                                                                                                                                                                                               | 0.000000 |          |          |          |   |   |      |          |  |  |  |  |     |          |          |  |  |  |      |          |          |          |  |  |     |          |          |          |          |  |      |          |          |          |          |          |      |          |          |          |          |          |      |          |          |          |          |          |      |          |          |          |          |          |  |   |   |   |  |  |      |          |  |  |  |  |      |          |          |  |  |  |      |          |          |          |  |  |
| 3 B                                                                                                                             | 2.045924                                                                                                                                                                                                                                                                                                                                                                                                                                                                                                                                                                                                                                                                                                                                                                                                                                                                                                                                                                                                                                                                                                                                                                                                                                                                                                                                                               | 2.857413 | 0.000000 |          |          |   |   |      |          |  |  |  |  |     |          |          |  |  |  |      |          |          |          |  |  |     |          |          |          |          |  |      |          |          |          |          |          |      |          |          |          |          |          |      |          |          |          |          |          |      |          |          |          |          |          |  |   |   |   |  |  |      |          |  |  |  |  |      |          |          |  |  |  |      |          |          |          |  |  |
| 4 B                                                                                                                             | 3.217193                                                                                                                                                                                                                                                                                                                                                                                                                                                                                                                                                                                                                                                                                                                                                                                                                                                                                                                                                                                                                                                                                                                                                                                                                                                                                                                                                               | 2.793927 | 1.810654 | 0.000000 |          |   |   |      |          |  |  |  |  |     |          |          |  |  |  |      |          |          |          |  |  |     |          |          |          |          |  |      |          |          |          |          |          |      |          |          |          |          |          |      |          |          |          |          |          |      |          |          |          |          |          |  |   |   |   |  |  |      |          |  |  |  |  |      |          |          |  |  |  |      |          |          |          |  |  |
| 5 Se                                                                                                                            | 3.321253                                                                                                                                                                                                                                                                                                                                                                                                                                                                                                                                                                                                                                                                                                                                                                                                                                                                                                                                                                                                                                                                                                                                                                                                                                                                                                                                                               | 3.451048 | 2.045904 | 2.126992 | 0.000000 |   |   |      |          |  |  |  |  |     |          |          |  |  |  |      |          |          |          |  |  |     |          |          |          |          |  |      |          |          |          |          |          |      |          |          |          |          |          |      |          |          |          |          |          |      |          |          |          |          |          |  |   |   |   |  |  |      |          |  |  |  |  |      |          |          |  |  |  |      |          |          |          |  |  |
| 6 B                                                                                                                             | 2.126942                                                                                                                                                                                                                                                                                                                                                                                                                                                                                                                                                                                                                                                                                                                                                                                                                                                                                                                                                                                                                                                                                                                                                                                                                                                                                                                                                               | 1.890543 | 1.810662 | 1.754154 | 3.217083 |   |   |      |          |  |  |  |  |     |          |          |  |  |  |      |          |          |          |  |  |     |          |          |          |          |  |      |          |          |          |          |          |      |          |          |          |          |          |      |          |          |          |          |          |      |          |          |          |          |          |  |   |   |   |  |  |      |          |  |  |  |  |      |          |          |  |  |  |      |          |          |          |  |  |
| 7 Co                                                                                                                            | 3.480150                                                                                                                                                                                                                                                                                                                                                                                                                                                                                                                                                                                                                                                                                                                                                                                                                                                                                                                                                                                                                                                                                                                                                                                                                                                                                                                                                               | 1.911170 | 3.236987 | 2.012915 | 3.480117 |   |   |      |          |  |  |  |  |     |          |          |  |  |  |      |          |          |          |  |  |     |          |          |          |          |  |      |          |          |          |          |          |      |          |          |          |          |          |      |          |          |          |          |          |      |          |          |          |          |          |  |   |   |   |  |  |      |          |  |  |  |  |      |          |          |  |  |  |      |          |          |          |  |  |
| 8 B                                                                                                                             | 3.451874                                                                                                                                                                                                                                                                                                                                                                                                                                                                                                                                                                                                                                                                                                                                                                                                                                                                                                                                                                                                                                                                                                                                                                                                                                                                                                                                                               | 2.412880 | 2.857604 | 1.890239 | 1.974529 |   |   |      |          |  |  |  |  |     |          |          |  |  |  |      |          |          |          |  |  |     |          |          |          |          |  |      |          |          |          |          |          |      |          |          |          |          |          |      |          |          |          |          |          |      |          |          |          |          |          |  |   |   |   |  |  |      |          |  |  |  |  |      |          |          |  |  |  |      |          |          |          |  |  |
|                                                                                                                                 | 6                                                                                                                                                                                                                                                                                                                                                                                                                                                                                                                                                                                                                                                                                                                                                                                                                                                                                                                                                                                                                                                                                                                                                                                                                                                                                                                                                                      | 7        | 8        |          |          |   |   |      |          |  |  |  |  |     |          |          |  |  |  |      |          |          |          |  |  |     |          |          |          |          |  |      |          |          |          |          |          |      |          |          |          |          |          |      |          |          |          |          |          |      |          |          |          |          |          |  |   |   |   |  |  |      |          |  |  |  |  |      |          |          |  |  |  |      |          |          |          |  |  |
| 6 B                                                                                                                             | 0.000000                                                                                                                                                                                                                                                                                                                                                                                                                                                                                                                                                                                                                                                                                                                                                                                                                                                                                                                                                                                                                                                                                                                                                                                                                                                                                                                                                               |          |          |          |          |   |   |      |          |  |  |  |  |     |          |          |  |  |  |      |          |          |          |  |  |     |          |          |          |          |  |      |          |          |          |          |          |      |          |          |          |          |          |      |          |          |          |          |          |      |          |          |          |          |          |  |   |   |   |  |  |      |          |  |  |  |  |      |          |          |  |  |  |      |          |          |          |  |  |
| 7 Co                                                                                                                            | 2.012789                                                                                                                                                                                                                                                                                                                                                                                                                                                                                                                                                                                                                                                                                                                                                                                                                                                                                                                                                                                                                                                                                                                                                                                                                                                                                                                                                               | 0.000000 |          |          |          |   |   |      |          |  |  |  |  |     |          |          |  |  |  |      |          |          |          |  |  |     |          |          |          |          |  |      |          |          |          |          |          |      |          |          |          |          |          |      |          |          |          |          |          |      |          |          |          |          |          |  |   |   |   |  |  |      |          |  |  |  |  |      |          |          |  |  |  |      |          |          |          |  |  |
| 8 B                                                                                                                             | 2.793968                                                                                                                                                                                                                                                                                                                                                                                                                                                                                                                                                                                                                                                                                                                                                                                                                                                                                                                                                                                                                                                                                                                                                                                                                                                                                                                                                               | 1.911087 | 0.000000 |          |          |   |   |      |          |  |  |  |  |     |          |          |  |  |  |      |          |          |          |  |  |     |          |          |          |          |  |      |          |          |          |          |          |      |          |          |          |          |          |      |          |          |          |          |          |      |          |          |          |          |          |  |   |   |   |  |  |      |          |  |  |  |  |      |          |          |  |  |  |      |          |          |          |  |  |

| 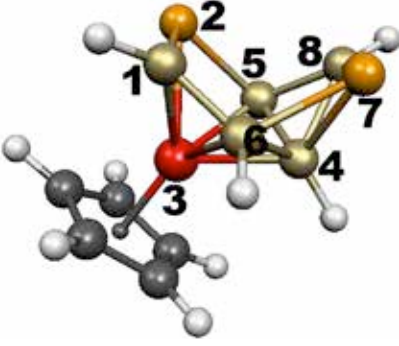 <p>7. -6506.3960156 +11.7 C<sub>1</sub></p>   | <table border="1"> <thead> <tr> <th></th> <th>1</th> <th>2</th> <th>3</th> <th>4</th> <th>5</th> </tr> </thead> <tbody> <tr> <td>1 B</td> <td>0.000000</td> <td></td> <td></td> <td></td> <td></td> </tr> <tr> <td>2 Se</td> <td>1.965694</td> <td>0.000000</td> <td></td> <td></td> <td></td> </tr> <tr> <td>3 Co</td> <td>2.119750</td> <td>2.360251</td> <td>0.000000</td> <td></td> <td></td> </tr> <tr> <td>4 B</td> <td>2.895628</td> <td>3.133240</td> <td>2.065850</td> <td>0.000000</td> <td></td> </tr> <tr> <td>5 B</td> <td>2.975451</td> <td>2.042613</td> <td>2.054709</td> <td>1.759455</td> <td>0.000000</td> </tr> <tr> <td>6 B</td> <td>1.657267</td> <td>3.031950</td> <td>2.108774</td> <td>1.836705</td> <td>2.893395</td> </tr> <tr> <td>7 Se</td> <td>3.055319</td> <td>3.660260</td> <td>3.634916</td> <td>2.128863</td> <td>3.100091</td> </tr> <tr> <td>8 B</td> <td>3.399846</td> <td>2.915679</td> <td>3.263730</td> <td>1.825547</td> <td>1.708020</td> </tr> <tr> <td></td> <td>6</td> <td>7</td> <td>8</td> <td></td> <td></td> </tr> <tr> <td>6 B</td> <td>0.000000</td> <td></td> <td></td> <td></td> <td></td> </tr> <tr> <td>7 Se</td> <td>2.087623</td> <td>0.000000</td> <td></td> <td></td> <td></td> </tr> <tr> <td>8 B</td> <td>2.913675</td> <td>1.908638</td> <td>0.000000</td> <td></td> <td></td> </tr> </tbody> </table>  |          | 1        | 2        | 3        | 4 | 5 | 1 B  | 0.000000 |  |  |  |  | 2 Se | 1.965694 | 0.000000 |  |  |  | 3 Co | 2.119750 | 2.360251 | 0.000000 |  |  | 4 B  | 2.895628 | 3.133240 | 2.065850 | 0.000000 |  | 5 B | 2.975451 | 2.042613 | 2.054709 | 1.759455 | 0.000000 | 6 B | 1.657267 | 3.031950 | 2.108774 | 1.836705 | 2.893395 | 7 Se | 3.055319 | 3.660260 | 3.634916 | 2.128863 | 3.100091 | 8 B  | 3.399846 | 2.915679 | 3.263730 | 1.825547 | 1.708020 |  | 6 | 7 | 8 |  |  | 6 B | 0.000000 |  |  |  |  | 7 Se | 2.087623 | 0.000000 |  |  |  | 8 B  | 2.913675 | 1.908638 | 0.000000 |  |  |
|---------------------------------------------------------------------------------------------------------------------------------|------------------------------------------------------------------------------------------------------------------------------------------------------------------------------------------------------------------------------------------------------------------------------------------------------------------------------------------------------------------------------------------------------------------------------------------------------------------------------------------------------------------------------------------------------------------------------------------------------------------------------------------------------------------------------------------------------------------------------------------------------------------------------------------------------------------------------------------------------------------------------------------------------------------------------------------------------------------------------------------------------------------------------------------------------------------------------------------------------------------------------------------------------------------------------------------------------------------------------------------------------------------------------------------------------------------------------------------------------------------------|----------|----------|----------|----------|---|---|------|----------|--|--|--|--|------|----------|----------|--|--|--|------|----------|----------|----------|--|--|------|----------|----------|----------|----------|--|-----|----------|----------|----------|----------|----------|-----|----------|----------|----------|----------|----------|------|----------|----------|----------|----------|----------|------|----------|----------|----------|----------|----------|--|---|---|---|--|--|-----|----------|--|--|--|--|------|----------|----------|--|--|--|------|----------|----------|----------|--|--|
|                                                                                                                                 | 1                                                                                                                                                                                                                                                                                                                                                                                                                                                                                                                                                                                                                                                                                                                                                                                                                                                                                                                                                                                                                                                                                                                                                                                                                                                                                                                                                                      | 2        | 3        | 4        | 5        |   |   |      |          |  |  |  |  |      |          |          |  |  |  |      |          |          |          |  |  |      |          |          |          |          |  |     |          |          |          |          |          |     |          |          |          |          |          |      |          |          |          |          |          |      |          |          |          |          |          |  |   |   |   |  |  |     |          |  |  |  |  |      |          |          |  |  |  |      |          |          |          |  |  |
| 1 B                                                                                                                             | 0.000000                                                                                                                                                                                                                                                                                                                                                                                                                                                                                                                                                                                                                                                                                                                                                                                                                                                                                                                                                                                                                                                                                                                                                                                                                                                                                                                                                               |          |          |          |          |   |   |      |          |  |  |  |  |      |          |          |  |  |  |      |          |          |          |  |  |      |          |          |          |          |  |     |          |          |          |          |          |     |          |          |          |          |          |      |          |          |          |          |          |      |          |          |          |          |          |  |   |   |   |  |  |     |          |  |  |  |  |      |          |          |  |  |  |      |          |          |          |  |  |
| 2 Se                                                                                                                            | 1.965694                                                                                                                                                                                                                                                                                                                                                                                                                                                                                                                                                                                                                                                                                                                                                                                                                                                                                                                                                                                                                                                                                                                                                                                                                                                                                                                                                               | 0.000000 |          |          |          |   |   |      |          |  |  |  |  |      |          |          |  |  |  |      |          |          |          |  |  |      |          |          |          |          |  |     |          |          |          |          |          |     |          |          |          |          |          |      |          |          |          |          |          |      |          |          |          |          |          |  |   |   |   |  |  |     |          |  |  |  |  |      |          |          |  |  |  |      |          |          |          |  |  |
| 3 Co                                                                                                                            | 2.119750                                                                                                                                                                                                                                                                                                                                                                                                                                                                                                                                                                                                                                                                                                                                                                                                                                                                                                                                                                                                                                                                                                                                                                                                                                                                                                                                                               | 2.360251 | 0.000000 |          |          |   |   |      |          |  |  |  |  |      |          |          |  |  |  |      |          |          |          |  |  |      |          |          |          |          |  |     |          |          |          |          |          |     |          |          |          |          |          |      |          |          |          |          |          |      |          |          |          |          |          |  |   |   |   |  |  |     |          |  |  |  |  |      |          |          |  |  |  |      |          |          |          |  |  |
| 4 B                                                                                                                             | 2.895628                                                                                                                                                                                                                                                                                                                                                                                                                                                                                                                                                                                                                                                                                                                                                                                                                                                                                                                                                                                                                                                                                                                                                                                                                                                                                                                                                               | 3.133240 | 2.065850 | 0.000000 |          |   |   |      |          |  |  |  |  |      |          |          |  |  |  |      |          |          |          |  |  |      |          |          |          |          |  |     |          |          |          |          |          |     |          |          |          |          |          |      |          |          |          |          |          |      |          |          |          |          |          |  |   |   |   |  |  |     |          |  |  |  |  |      |          |          |  |  |  |      |          |          |          |  |  |
| 5 B                                                                                                                             | 2.975451                                                                                                                                                                                                                                                                                                                                                                                                                                                                                                                                                                                                                                                                                                                                                                                                                                                                                                                                                                                                                                                                                                                                                                                                                                                                                                                                                               | 2.042613 | 2.054709 | 1.759455 | 0.000000 |   |   |      |          |  |  |  |  |      |          |          |  |  |  |      |          |          |          |  |  |      |          |          |          |          |  |     |          |          |          |          |          |     |          |          |          |          |          |      |          |          |          |          |          |      |          |          |          |          |          |  |   |   |   |  |  |     |          |  |  |  |  |      |          |          |  |  |  |      |          |          |          |  |  |
| 6 B                                                                                                                             | 1.657267                                                                                                                                                                                                                                                                                                                                                                                                                                                                                                                                                                                                                                                                                                                                                                                                                                                                                                                                                                                                                                                                                                                                                                                                                                                                                                                                                               | 3.031950 | 2.108774 | 1.836705 | 2.893395 |   |   |      |          |  |  |  |  |      |          |          |  |  |  |      |          |          |          |  |  |      |          |          |          |          |  |     |          |          |          |          |          |     |          |          |          |          |          |      |          |          |          |          |          |      |          |          |          |          |          |  |   |   |   |  |  |     |          |  |  |  |  |      |          |          |  |  |  |      |          |          |          |  |  |
| 7 Se                                                                                                                            | 3.055319                                                                                                                                                                                                                                                                                                                                                                                                                                                                                                                                                                                                                                                                                                                                                                                                                                                                                                                                                                                                                                                                                                                                                                                                                                                                                                                                                               | 3.660260 | 3.634916 | 2.128863 | 3.100091 |   |   |      |          |  |  |  |  |      |          |          |  |  |  |      |          |          |          |  |  |      |          |          |          |          |  |     |          |          |          |          |          |     |          |          |          |          |          |      |          |          |          |          |          |      |          |          |          |          |          |  |   |   |   |  |  |     |          |  |  |  |  |      |          |          |  |  |  |      |          |          |          |  |  |
| 8 B                                                                                                                             | 3.399846                                                                                                                                                                                                                                                                                                                                                                                                                                                                                                                                                                                                                                                                                                                                                                                                                                                                                                                                                                                                                                                                                                                                                                                                                                                                                                                                                               | 2.915679 | 3.263730 | 1.825547 | 1.708020 |   |   |      |          |  |  |  |  |      |          |          |  |  |  |      |          |          |          |  |  |      |          |          |          |          |  |     |          |          |          |          |          |     |          |          |          |          |          |      |          |          |          |          |          |      |          |          |          |          |          |  |   |   |   |  |  |     |          |  |  |  |  |      |          |          |  |  |  |      |          |          |          |  |  |
|                                                                                                                                 | 6                                                                                                                                                                                                                                                                                                                                                                                                                                                                                                                                                                                                                                                                                                                                                                                                                                                                                                                                                                                                                                                                                                                                                                                                                                                                                                                                                                      | 7        | 8        |          |          |   |   |      |          |  |  |  |  |      |          |          |  |  |  |      |          |          |          |  |  |      |          |          |          |          |  |     |          |          |          |          |          |     |          |          |          |          |          |      |          |          |          |          |          |      |          |          |          |          |          |  |   |   |   |  |  |     |          |  |  |  |  |      |          |          |  |  |  |      |          |          |          |  |  |
| 6 B                                                                                                                             | 0.000000                                                                                                                                                                                                                                                                                                                                                                                                                                                                                                                                                                                                                                                                                                                                                                                                                                                                                                                                                                                                                                                                                                                                                                                                                                                                                                                                                               |          |          |          |          |   |   |      |          |  |  |  |  |      |          |          |  |  |  |      |          |          |          |  |  |      |          |          |          |          |  |     |          |          |          |          |          |     |          |          |          |          |          |      |          |          |          |          |          |      |          |          |          |          |          |  |   |   |   |  |  |     |          |  |  |  |  |      |          |          |  |  |  |      |          |          |          |  |  |
| 7 Se                                                                                                                            | 2.087623                                                                                                                                                                                                                                                                                                                                                                                                                                                                                                                                                                                                                                                                                                                                                                                                                                                                                                                                                                                                                                                                                                                                                                                                                                                                                                                                                               | 0.000000 |          |          |          |   |   |      |          |  |  |  |  |      |          |          |  |  |  |      |          |          |          |  |  |      |          |          |          |          |  |     |          |          |          |          |          |     |          |          |          |          |          |      |          |          |          |          |          |      |          |          |          |          |          |  |   |   |   |  |  |     |          |  |  |  |  |      |          |          |  |  |  |      |          |          |          |  |  |
| 8 B                                                                                                                             | 2.913675                                                                                                                                                                                                                                                                                                                                                                                                                                                                                                                                                                                                                                                                                                                                                                                                                                                                                                                                                                                                                                                                                                                                                                                                                                                                                                                                                               | 1.908638 | 0.000000 |          |          |   |   |      |          |  |  |  |  |      |          |          |  |  |  |      |          |          |          |  |  |      |          |          |          |          |  |     |          |          |          |          |          |     |          |          |          |          |          |      |          |          |          |          |          |      |          |          |          |          |          |  |   |   |   |  |  |     |          |  |  |  |  |      |          |          |  |  |  |      |          |          |          |  |  |
|  <p>8. -6506.3932804 +13.4 C<sub>1</sub></p>  | <table border="1"> <thead> <tr> <th></th> <th>1</th> <th>2</th> <th>3</th> <th>4</th> <th>5</th> </tr> </thead> <tbody> <tr> <td>1 Se</td> <td>0.000000</td> <td></td> <td></td> <td></td> <td></td> </tr> <tr> <td>2 Se</td> <td>3.238686</td> <td>0.000000</td> <td></td> <td></td> <td></td> </tr> <tr> <td>3 Co</td> <td>2.336945</td> <td>3.605003</td> <td>0.000000</td> <td></td> <td></td> </tr> <tr> <td>4 B</td> <td>2.074608</td> <td>2.139206</td> <td>3.286652</td> <td>0.000000</td> <td></td> </tr> <tr> <td>5 B</td> <td>2.085985</td> <td>2.133771</td> <td>1.961561</td> <td>2.645169</td> <td>0.000000</td> </tr> <tr> <td>6 B</td> <td>2.312893</td> <td>3.008811</td> <td>2.008676</td> <td>1.925633</td> <td>2.623336</td> </tr> <tr> <td>7 B</td> <td>3.249735</td> <td>2.035448</td> <td>3.244665</td> <td>1.699286</td> <td>2.939758</td> </tr> <tr> <td>8 B</td> <td>3.095262</td> <td>2.235374</td> <td>1.999525</td> <td>2.669680</td> <td>1.960948</td> </tr> <tr> <td></td> <td>6</td> <td>7</td> <td>8</td> <td></td> <td></td> </tr> <tr> <td>6 B</td> <td>0.000000</td> <td></td> <td></td> <td></td> <td></td> </tr> <tr> <td>7 B</td> <td>1.680989</td> <td>0.000000</td> <td></td> <td></td> <td></td> </tr> <tr> <td>8 B</td> <td>1.764667</td> <td>1.766479</td> <td>0.000000</td> <td></td> <td></td> </tr> </tbody> </table>   |          | 1        | 2        | 3        | 4 | 5 | 1 Se | 0.000000 |  |  |  |  | 2 Se | 3.238686 | 0.000000 |  |  |  | 3 Co | 2.336945 | 3.605003 | 0.000000 |  |  | 4 B  | 2.074608 | 2.139206 | 3.286652 | 0.000000 |  | 5 B | 2.085985 | 2.133771 | 1.961561 | 2.645169 | 0.000000 | 6 B | 2.312893 | 3.008811 | 2.008676 | 1.925633 | 2.623336 | 7 B  | 3.249735 | 2.035448 | 3.244665 | 1.699286 | 2.939758 | 8 B  | 3.095262 | 2.235374 | 1.999525 | 2.669680 | 1.960948 |  | 6 | 7 | 8 |  |  | 6 B | 0.000000 |  |  |  |  | 7 B  | 1.680989 | 0.000000 |  |  |  | 8 B  | 1.764667 | 1.766479 | 0.000000 |  |  |
|                                                                                                                                 | 1                                                                                                                                                                                                                                                                                                                                                                                                                                                                                                                                                                                                                                                                                                                                                                                                                                                                                                                                                                                                                                                                                                                                                                                                                                                                                                                                                                      | 2        | 3        | 4        | 5        |   |   |      |          |  |  |  |  |      |          |          |  |  |  |      |          |          |          |  |  |      |          |          |          |          |  |     |          |          |          |          |          |     |          |          |          |          |          |      |          |          |          |          |          |      |          |          |          |          |          |  |   |   |   |  |  |     |          |  |  |  |  |      |          |          |  |  |  |      |          |          |          |  |  |
| 1 Se                                                                                                                            | 0.000000                                                                                                                                                                                                                                                                                                                                                                                                                                                                                                                                                                                                                                                                                                                                                                                                                                                                                                                                                                                                                                                                                                                                                                                                                                                                                                                                                               |          |          |          |          |   |   |      |          |  |  |  |  |      |          |          |  |  |  |      |          |          |          |  |  |      |          |          |          |          |  |     |          |          |          |          |          |     |          |          |          |          |          |      |          |          |          |          |          |      |          |          |          |          |          |  |   |   |   |  |  |     |          |  |  |  |  |      |          |          |  |  |  |      |          |          |          |  |  |
| 2 Se                                                                                                                            | 3.238686                                                                                                                                                                                                                                                                                                                                                                                                                                                                                                                                                                                                                                                                                                                                                                                                                                                                                                                                                                                                                                                                                                                                                                                                                                                                                                                                                               | 0.000000 |          |          |          |   |   |      |          |  |  |  |  |      |          |          |  |  |  |      |          |          |          |  |  |      |          |          |          |          |  |     |          |          |          |          |          |     |          |          |          |          |          |      |          |          |          |          |          |      |          |          |          |          |          |  |   |   |   |  |  |     |          |  |  |  |  |      |          |          |  |  |  |      |          |          |          |  |  |
| 3 Co                                                                                                                            | 2.336945                                                                                                                                                                                                                                                                                                                                                                                                                                                                                                                                                                                                                                                                                                                                                                                                                                                                                                                                                                                                                                                                                                                                                                                                                                                                                                                                                               | 3.605003 | 0.000000 |          |          |   |   |      |          |  |  |  |  |      |          |          |  |  |  |      |          |          |          |  |  |      |          |          |          |          |  |     |          |          |          |          |          |     |          |          |          |          |          |      |          |          |          |          |          |      |          |          |          |          |          |  |   |   |   |  |  |     |          |  |  |  |  |      |          |          |  |  |  |      |          |          |          |  |  |
| 4 B                                                                                                                             | 2.074608                                                                                                                                                                                                                                                                                                                                                                                                                                                                                                                                                                                                                                                                                                                                                                                                                                                                                                                                                                                                                                                                                                                                                                                                                                                                                                                                                               | 2.139206 | 3.286652 | 0.000000 |          |   |   |      |          |  |  |  |  |      |          |          |  |  |  |      |          |          |          |  |  |      |          |          |          |          |  |     |          |          |          |          |          |     |          |          |          |          |          |      |          |          |          |          |          |      |          |          |          |          |          |  |   |   |   |  |  |     |          |  |  |  |  |      |          |          |  |  |  |      |          |          |          |  |  |
| 5 B                                                                                                                             | 2.085985                                                                                                                                                                                                                                                                                                                                                                                                                                                                                                                                                                                                                                                                                                                                                                                                                                                                                                                                                                                                                                                                                                                                                                                                                                                                                                                                                               | 2.133771 | 1.961561 | 2.645169 | 0.000000 |   |   |      |          |  |  |  |  |      |          |          |  |  |  |      |          |          |          |  |  |      |          |          |          |          |  |     |          |          |          |          |          |     |          |          |          |          |          |      |          |          |          |          |          |      |          |          |          |          |          |  |   |   |   |  |  |     |          |  |  |  |  |      |          |          |  |  |  |      |          |          |          |  |  |
| 6 B                                                                                                                             | 2.312893                                                                                                                                                                                                                                                                                                                                                                                                                                                                                                                                                                                                                                                                                                                                                                                                                                                                                                                                                                                                                                                                                                                                                                                                                                                                                                                                                               | 3.008811 | 2.008676 | 1.925633 | 2.623336 |   |   |      |          |  |  |  |  |      |          |          |  |  |  |      |          |          |          |  |  |      |          |          |          |          |  |     |          |          |          |          |          |     |          |          |          |          |          |      |          |          |          |          |          |      |          |          |          |          |          |  |   |   |   |  |  |     |          |  |  |  |  |      |          |          |  |  |  |      |          |          |          |  |  |
| 7 B                                                                                                                             | 3.249735                                                                                                                                                                                                                                                                                                                                                                                                                                                                                                                                                                                                                                                                                                                                                                                                                                                                                                                                                                                                                                                                                                                                                                                                                                                                                                                                                               | 2.035448 | 3.244665 | 1.699286 | 2.939758 |   |   |      |          |  |  |  |  |      |          |          |  |  |  |      |          |          |          |  |  |      |          |          |          |          |  |     |          |          |          |          |          |     |          |          |          |          |          |      |          |          |          |          |          |      |          |          |          |          |          |  |   |   |   |  |  |     |          |  |  |  |  |      |          |          |  |  |  |      |          |          |          |  |  |
| 8 B                                                                                                                             | 3.095262                                                                                                                                                                                                                                                                                                                                                                                                                                                                                                                                                                                                                                                                                                                                                                                                                                                                                                                                                                                                                                                                                                                                                                                                                                                                                                                                                               | 2.235374 | 1.999525 | 2.669680 | 1.960948 |   |   |      |          |  |  |  |  |      |          |          |  |  |  |      |          |          |          |  |  |      |          |          |          |          |  |     |          |          |          |          |          |     |          |          |          |          |          |      |          |          |          |          |          |      |          |          |          |          |          |  |   |   |   |  |  |     |          |  |  |  |  |      |          |          |  |  |  |      |          |          |          |  |  |
|                                                                                                                                 | 6                                                                                                                                                                                                                                                                                                                                                                                                                                                                                                                                                                                                                                                                                                                                                                                                                                                                                                                                                                                                                                                                                                                                                                                                                                                                                                                                                                      | 7        | 8        |          |          |   |   |      |          |  |  |  |  |      |          |          |  |  |  |      |          |          |          |  |  |      |          |          |          |          |  |     |          |          |          |          |          |     |          |          |          |          |          |      |          |          |          |          |          |      |          |          |          |          |          |  |   |   |   |  |  |     |          |  |  |  |  |      |          |          |  |  |  |      |          |          |          |  |  |
| 6 B                                                                                                                             | 0.000000                                                                                                                                                                                                                                                                                                                                                                                                                                                                                                                                                                                                                                                                                                                                                                                                                                                                                                                                                                                                                                                                                                                                                                                                                                                                                                                                                               |          |          |          |          |   |   |      |          |  |  |  |  |      |          |          |  |  |  |      |          |          |          |  |  |      |          |          |          |          |  |     |          |          |          |          |          |     |          |          |          |          |          |      |          |          |          |          |          |      |          |          |          |          |          |  |   |   |   |  |  |     |          |  |  |  |  |      |          |          |  |  |  |      |          |          |          |  |  |
| 7 B                                                                                                                             | 1.680989                                                                                                                                                                                                                                                                                                                                                                                                                                                                                                                                                                                                                                                                                                                                                                                                                                                                                                                                                                                                                                                                                                                                                                                                                                                                                                                                                               | 0.000000 |          |          |          |   |   |      |          |  |  |  |  |      |          |          |  |  |  |      |          |          |          |  |  |      |          |          |          |          |  |     |          |          |          |          |          |     |          |          |          |          |          |      |          |          |          |          |          |      |          |          |          |          |          |  |   |   |   |  |  |     |          |  |  |  |  |      |          |          |  |  |  |      |          |          |          |  |  |
| 8 B                                                                                                                             | 1.764667                                                                                                                                                                                                                                                                                                                                                                                                                                                                                                                                                                                                                                                                                                                                                                                                                                                                                                                                                                                                                                                                                                                                                                                                                                                                                                                                                               | 1.766479 | 0.000000 |          |          |   |   |      |          |  |  |  |  |      |          |          |  |  |  |      |          |          |          |  |  |      |          |          |          |          |  |     |          |          |          |          |          |     |          |          |          |          |          |      |          |          |          |          |          |      |          |          |          |          |          |  |   |   |   |  |  |     |          |  |  |  |  |      |          |          |  |  |  |      |          |          |          |  |  |
|  <p>9. -6506.3927968 +13.7 C<sub>1</sub></p> | <table border="1"> <thead> <tr> <th></th> <th>1</th> <th>2</th> <th>3</th> <th>4</th> <th>5</th> </tr> </thead> <tbody> <tr> <td>1 B</td> <td>0.000000</td> <td></td> <td></td> <td></td> <td></td> </tr> <tr> <td>2 B</td> <td>3.423822</td> <td>0.000000</td> <td></td> <td></td> <td></td> </tr> <tr> <td>3 B</td> <td>1.859851</td> <td>2.889126</td> <td>0.000000</td> <td></td> <td></td> </tr> <tr> <td>4 Co</td> <td>3.299924</td> <td>1.930295</td> <td>2.055967</td> <td>0.000000</td> <td></td> </tr> <tr> <td>5 B</td> <td>1.687013</td> <td>2.947786</td> <td>1.741208</td> <td>3.228984</td> <td>0.000000</td> </tr> <tr> <td>6 B</td> <td>2.898349</td> <td>1.843919</td> <td>1.756992</td> <td>2.041583</td> <td>1.799463</td> </tr> <tr> <td>7 Se</td> <td>2.937771</td> <td>1.956160</td> <td>3.144109</td> <td>3.425278</td> <td>2.047735</td> </tr> <tr> <td>8 Se</td> <td>1.923594</td> <td>3.128009</td> <td>2.145632</td> <td>2.359154</td> <td>3.085680</td> </tr> <tr> <td></td> <td>6</td> <td>7</td> <td>8</td> <td></td> <td></td> </tr> <tr> <td>6 B</td> <td>0.000000</td> <td></td> <td></td> <td></td> <td></td> </tr> <tr> <td>7 Se</td> <td>2.135851</td> <td>0.000000</td> <td></td> <td></td> <td></td> </tr> <tr> <td>8 Se</td> <td>3.255667</td> <td>3.717841</td> <td>0.000000</td> <td></td> <td></td> </tr> </tbody> </table> |          | 1        | 2        | 3        | 4 | 5 | 1 B  | 0.000000 |  |  |  |  | 2 B  | 3.423822 | 0.000000 |  |  |  | 3 B  | 1.859851 | 2.889126 | 0.000000 |  |  | 4 Co | 3.299924 | 1.930295 | 2.055967 | 0.000000 |  | 5 B | 1.687013 | 2.947786 | 1.741208 | 3.228984 | 0.000000 | 6 B | 2.898349 | 1.843919 | 1.756992 | 2.041583 | 1.799463 | 7 Se | 2.937771 | 1.956160 | 3.144109 | 3.425278 | 2.047735 | 8 Se | 1.923594 | 3.128009 | 2.145632 | 2.359154 | 3.085680 |  | 6 | 7 | 8 |  |  | 6 B | 0.000000 |  |  |  |  | 7 Se | 2.135851 | 0.000000 |  |  |  | 8 Se | 3.255667 | 3.717841 | 0.000000 |  |  |
|                                                                                                                                 | 1                                                                                                                                                                                                                                                                                                                                                                                                                                                                                                                                                                                                                                                                                                                                                                                                                                                                                                                                                                                                                                                                                                                                                                                                                                                                                                                                                                      | 2        | 3        | 4        | 5        |   |   |      |          |  |  |  |  |      |          |          |  |  |  |      |          |          |          |  |  |      |          |          |          |          |  |     |          |          |          |          |          |     |          |          |          |          |          |      |          |          |          |          |          |      |          |          |          |          |          |  |   |   |   |  |  |     |          |  |  |  |  |      |          |          |  |  |  |      |          |          |          |  |  |
| 1 B                                                                                                                             | 0.000000                                                                                                                                                                                                                                                                                                                                                                                                                                                                                                                                                                                                                                                                                                                                                                                                                                                                                                                                                                                                                                                                                                                                                                                                                                                                                                                                                               |          |          |          |          |   |   |      |          |  |  |  |  |      |          |          |  |  |  |      |          |          |          |  |  |      |          |          |          |          |  |     |          |          |          |          |          |     |          |          |          |          |          |      |          |          |          |          |          |      |          |          |          |          |          |  |   |   |   |  |  |     |          |  |  |  |  |      |          |          |  |  |  |      |          |          |          |  |  |
| 2 B                                                                                                                             | 3.423822                                                                                                                                                                                                                                                                                                                                                                                                                                                                                                                                                                                                                                                                                                                                                                                                                                                                                                                                                                                                                                                                                                                                                                                                                                                                                                                                                               | 0.000000 |          |          |          |   |   |      |          |  |  |  |  |      |          |          |  |  |  |      |          |          |          |  |  |      |          |          |          |          |  |     |          |          |          |          |          |     |          |          |          |          |          |      |          |          |          |          |          |      |          |          |          |          |          |  |   |   |   |  |  |     |          |  |  |  |  |      |          |          |  |  |  |      |          |          |          |  |  |
| 3 B                                                                                                                             | 1.859851                                                                                                                                                                                                                                                                                                                                                                                                                                                                                                                                                                                                                                                                                                                                                                                                                                                                                                                                                                                                                                                                                                                                                                                                                                                                                                                                                               | 2.889126 | 0.000000 |          |          |   |   |      |          |  |  |  |  |      |          |          |  |  |  |      |          |          |          |  |  |      |          |          |          |          |  |     |          |          |          |          |          |     |          |          |          |          |          |      |          |          |          |          |          |      |          |          |          |          |          |  |   |   |   |  |  |     |          |  |  |  |  |      |          |          |  |  |  |      |          |          |          |  |  |
| 4 Co                                                                                                                            | 3.299924                                                                                                                                                                                                                                                                                                                                                                                                                                                                                                                                                                                                                                                                                                                                                                                                                                                                                                                                                                                                                                                                                                                                                                                                                                                                                                                                                               | 1.930295 | 2.055967 | 0.000000 |          |   |   |      |          |  |  |  |  |      |          |          |  |  |  |      |          |          |          |  |  |      |          |          |          |          |  |     |          |          |          |          |          |     |          |          |          |          |          |      |          |          |          |          |          |      |          |          |          |          |          |  |   |   |   |  |  |     |          |  |  |  |  |      |          |          |  |  |  |      |          |          |          |  |  |
| 5 B                                                                                                                             | 1.687013                                                                                                                                                                                                                                                                                                                                                                                                                                                                                                                                                                                                                                                                                                                                                                                                                                                                                                                                                                                                                                                                                                                                                                                                                                                                                                                                                               | 2.947786 | 1.741208 | 3.228984 | 0.000000 |   |   |      |          |  |  |  |  |      |          |          |  |  |  |      |          |          |          |  |  |      |          |          |          |          |  |     |          |          |          |          |          |     |          |          |          |          |          |      |          |          |          |          |          |      |          |          |          |          |          |  |   |   |   |  |  |     |          |  |  |  |  |      |          |          |  |  |  |      |          |          |          |  |  |
| 6 B                                                                                                                             | 2.898349                                                                                                                                                                                                                                                                                                                                                                                                                                                                                                                                                                                                                                                                                                                                                                                                                                                                                                                                                                                                                                                                                                                                                                                                                                                                                                                                                               | 1.843919 | 1.756992 | 2.041583 | 1.799463 |   |   |      |          |  |  |  |  |      |          |          |  |  |  |      |          |          |          |  |  |      |          |          |          |          |  |     |          |          |          |          |          |     |          |          |          |          |          |      |          |          |          |          |          |      |          |          |          |          |          |  |   |   |   |  |  |     |          |  |  |  |  |      |          |          |  |  |  |      |          |          |          |  |  |
| 7 Se                                                                                                                            | 2.937771                                                                                                                                                                                                                                                                                                                                                                                                                                                                                                                                                                                                                                                                                                                                                                                                                                                                                                                                                                                                                                                                                                                                                                                                                                                                                                                                                               | 1.956160 | 3.144109 | 3.425278 | 2.047735 |   |   |      |          |  |  |  |  |      |          |          |  |  |  |      |          |          |          |  |  |      |          |          |          |          |  |     |          |          |          |          |          |     |          |          |          |          |          |      |          |          |          |          |          |      |          |          |          |          |          |  |   |   |   |  |  |     |          |  |  |  |  |      |          |          |  |  |  |      |          |          |          |  |  |
| 8 Se                                                                                                                            | 1.923594                                                                                                                                                                                                                                                                                                                                                                                                                                                                                                                                                                                                                                                                                                                                                                                                                                                                                                                                                                                                                                                                                                                                                                                                                                                                                                                                                               | 3.128009 | 2.145632 | 2.359154 | 3.085680 |   |   |      |          |  |  |  |  |      |          |          |  |  |  |      |          |          |          |  |  |      |          |          |          |          |  |     |          |          |          |          |          |     |          |          |          |          |          |      |          |          |          |          |          |      |          |          |          |          |          |  |   |   |   |  |  |     |          |  |  |  |  |      |          |          |  |  |  |      |          |          |          |  |  |
|                                                                                                                                 | 6                                                                                                                                                                                                                                                                                                                                                                                                                                                                                                                                                                                                                                                                                                                                                                                                                                                                                                                                                                                                                                                                                                                                                                                                                                                                                                                                                                      | 7        | 8        |          |          |   |   |      |          |  |  |  |  |      |          |          |  |  |  |      |          |          |          |  |  |      |          |          |          |          |  |     |          |          |          |          |          |     |          |          |          |          |          |      |          |          |          |          |          |      |          |          |          |          |          |  |   |   |   |  |  |     |          |  |  |  |  |      |          |          |  |  |  |      |          |          |          |  |  |
| 6 B                                                                                                                             | 0.000000                                                                                                                                                                                                                                                                                                                                                                                                                                                                                                                                                                                                                                                                                                                                                                                                                                                                                                                                                                                                                                                                                                                                                                                                                                                                                                                                                               |          |          |          |          |   |   |      |          |  |  |  |  |      |          |          |  |  |  |      |          |          |          |  |  |      |          |          |          |          |  |     |          |          |          |          |          |     |          |          |          |          |          |      |          |          |          |          |          |      |          |          |          |          |          |  |   |   |   |  |  |     |          |  |  |  |  |      |          |          |  |  |  |      |          |          |          |  |  |
| 7 Se                                                                                                                            | 2.135851                                                                                                                                                                                                                                                                                                                                                                                                                                                                                                                                                                                                                                                                                                                                                                                                                                                                                                                                                                                                                                                                                                                                                                                                                                                                                                                                                               | 0.000000 |          |          |          |   |   |      |          |  |  |  |  |      |          |          |  |  |  |      |          |          |          |  |  |      |          |          |          |          |  |     |          |          |          |          |          |     |          |          |          |          |          |      |          |          |          |          |          |      |          |          |          |          |          |  |   |   |   |  |  |     |          |  |  |  |  |      |          |          |  |  |  |      |          |          |          |  |  |
| 8 Se                                                                                                                            | 3.255667                                                                                                                                                                                                                                                                                                                                                                                                                                                                                                                                                                                                                                                                                                                                                                                                                                                                                                                                                                                                                                                                                                                                                                                                                                                                                                                                                               | 3.717841 | 0.000000 |          |          |   |   |      |          |  |  |  |  |      |          |          |  |  |  |      |          |          |          |  |  |      |          |          |          |          |  |     |          |          |          |          |          |     |          |          |          |          |          |      |          |          |          |          |          |      |          |          |          |          |          |  |   |   |   |  |  |     |          |  |  |  |  |      |          |          |  |  |  |      |          |          |          |  |  |

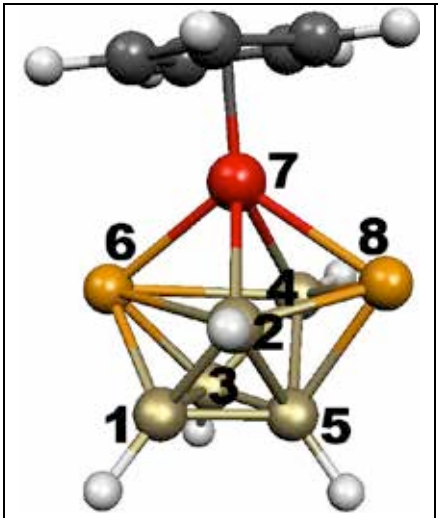

10. -6506.3801122 +21.6 C<sub>s</sub>

|      | 1        | 2        | 3        | 4        | 5        |
|------|----------|----------|----------|----------|----------|
| 1 B  | 0.000000 |          |          |          |          |
| 2 B  | 1.753134 | 0.000000 |          |          |          |
| 3 B  | 1.779351 | 2.801317 | 0.000000 |          |          |
| 4 B  | 2.787864 | 2.661208 | 1.753902 | 0.000000 |          |
| 5 B  | 1.702524 | 1.916706 | 1.699061 | 1.915848 | 0.000000 |
| 6 Se | 2.014553 | 2.639924 | 2.010922 | 2.609409 | 2.973085 |
| 7 Co | 3.077395 | 2.133966 | 3.096061 | 2.139759 | 3.050404 |
| 8 Se | 3.236131 | 2.043252 | 3.238480 | 2.041868 | 2.107366 |
|      | 6        | 7        | 8        |          |          |
| 6 Se | 0.000000 |          |          |          |          |
| 7 Co | 2.327969 | 0.000000 |          |          |          |
| 8 Se | 3.762654 | 2.288832 | 0.000000 |          |          |

Table S1C. Energy ranking for all of the CpCoSe<sub>2</sub>B<sub>5</sub>H<sub>5</sub> optimized structures after B3LYP/6-31G(d) optimizations:

| No | Initial structure         | Final energy (a.u.) | ΔE (kcal/mol) |
|----|---------------------------|---------------------|---------------|
| 1  | 10-DicapTrPrism-Co3Se5Se1 | -6502.2230052       | 0.00          |
| 2  | 10-DicapTrPrism-Co1Se1Se6 | -6502.2229716       | 0.02          |
| 3  | 11-DicapOh-Co1Se1Se4      | -6502.2229702       | 0.02          |
| 4  | 11-DicapOh-Co2Se1Se3      | -6502.2229682       | 0.02          |
| 5  | 08-Nido-Co2Se1Se1         | -6502.2229628       | 0.03          |
| 6  | 06-Bipirhex-Co2Se2Se1     | -6502.2229587       | 0.03          |
| 7  | 03-TrigPyr-CoSe1Se2       | -6502.2229517       | 0.03          |
| 8  | 09-DicapTrPr-Co2Se1Se4    | -6502.2229355       | 0.04          |
| 9  | 10-DicapTrPrism-Co2Se2Se5 | -6502.2182724       | 2.97          |
| 10 | 04-AntiprTrig-CoSe1Se3    | -6502.2182669       | 2.97          |
| 11 | 05-Bisdisph-Co1Se3Se1     | -6502.2182652       | 2.97          |
| 12 | 08-Nido-Co1Se3Se4         | -6502.2182646       | 2.97          |
| 13 | 02-Antipr-CoSe3Se2        | -6502.2182635       | 2.98          |
| 14 | 11-DicapOh-Co1Se2Se1      | -6502.2182633       | 2.98          |
| 15 | 10-DicapTrPrism-Co3Se2Se4 | -6502.2182617       | 2.98          |
| 16 | 11-DicapOh-Co1Se2Se3      | -6502.2182614       | 2.98          |
| 17 | 09-DicapTrPr-Co1Se2Se2    | -6502.2182583       | 2.98          |
| 18 | 10-DicapTrPrism-Co2Se3Se4 | -6502.2182572       | 2.98          |
| 19 | 09-DicapTrPr-Co3Se5Se2    | -6502.2182561       | 2.98          |
| 20 | 06-Bipirhex-Co2Se2Se3     | -6502.2182527       | 2.98          |
| 21 | 04-AntiprTrig-CoSe2Se3    | -6502.2182505       | 2.98          |
| 22 | 08-Nido-Co2Se2Se2         | -6502.2182433       | 2.99          |
| 23 | 01-Cube-CoSe1Se4          | -6502.2182426       | 2.99          |
| 24 | 10-DicapTrPrism-Co3Se2Se3 | -6502.2182422       | 2.99          |
| 25 | 08-Nido-Co1Se1Se2         | -6502.2182388       | 2.99          |
| 26 | 05-Bisdisph-Co1Se2Se3     | -6502.2182382       | 2.99          |
| 27 | 09-DicapTrPr-Co3Se4Se3    | -6502.2182371       | 2.99          |
| 28 | 10-DicapTrPrism-Co3Se2Se1 | -6502.2182350       | 2.99          |
| 29 | 04-AntiprTrig-CoSe2Se5    | -6502.2182342       | 2.99          |
| 30 | 09-DicapTrPr-Co2Se3Se2    | -6502.2182340       | 2.99          |
| 31 | 09-DicapTrPr-Co3Se2Se3    | -6502.2182338       | 2.99          |
| 32 | 02-Antipr-CoSe1Se6        | -6502.2182335       | 2.99          |
| 33 | 05-Bisdisph-Co1Se4Se1     | -6502.2182329       | 2.99          |
| 34 | 07-Tdallcap-Co1Se3Se3     | -6502.2182314       | 3.00          |
| 35 | 10-DicapTrPrism-Co1Se2Se5 | -6502.2182265       | 3.00          |
| 36 | 10-DicapTrPrism-Co3Se4Se2 | -6502.2182261       | 3.00          |
| 37 | 11-DicapOh-Co1Se1Se3      | -6502.2182238       | 3.00          |
| 38 | 09-DicapTrPr-Co3Se1Se1    | -6502.2182195       | 3.00          |
| 39 | 07-Tdallcap-Co2Se3Se1     | -6502.2182172       | 3.00          |

|    |                           |               |      |
|----|---------------------------|---------------|------|
| 40 | 09-DicapTrPr-Co1Se4Se1    | -6502.2182148 | 3.01 |
| 41 | 09-DicapTrPr-Co3Se3Se3    | -6502.2182130 | 3.01 |
| 42 | 09-DicapTrPr-Co1Se3Se1    | -6502.2182093 | 3.01 |
| 43 | 09-DicapTrPr-Co2Se1Se1    | -6502.2182072 | 3.01 |
| 44 | 09-DicapTrPr-Co3Se2Se1    | -6502.2182062 | 3.01 |
| 45 | 10-DicapTrPrism-Co2Se1Se6 | -6502.2181989 | 3.02 |
| 46 | 07-Tdallcap-Co2Se4Se1     | -6502.2181966 | 3.02 |
| 47 | 09-DicapTrPr-Co2Se3Se3    | -6502.2181907 | 3.02 |
| 48 | 09-DicapTrPr-Co3Se1Se5    | -6502.2181901 | 3.02 |
| 49 | 07-Tdallcap-Co1Se2Se2     | -6502.2181900 | 3.02 |
| 50 | 04-AntiprTrig-CoSe4Se1    | -6502.2181851 | 3.02 |
| 51 | 09-DicapTrPr-Co2Se2Se5    | -6502.2181842 | 3.03 |
| 52 | 11-DicapOh-Co3Se3Se3      | -6502.2181792 | 3.03 |
| 53 | 01-Cube-CoSe2Se1          | -6502.2181704 | 3.03 |
| 54 | 07-Tdallcap-Co1Se1Se6     | -6502.2138330 | 5.76 |
| 55 | 09-DicapTrPr-Co1Se2Se4    | -6502.2138317 | 5.76 |
| 56 | 02-Antipr-CoSe1Se3        | -6502.2138306 | 5.76 |
| 57 | 08-Nido-Co2Se4Se1         | -6502.2138259 | 5.76 |
| 58 | 10-DicapTrPrism-Co1Se1Se1 | -6502.2138241 | 5.76 |
| 59 | 10-DicapTrPrism-Co2Se1Se2 | -6502.2138223 | 5.76 |
| 60 | 11-DicapOh-Co1Se1Se5      | -6502.2138218 | 5.76 |
| 61 | 08-Nido-Co2Se1Se6         | -6502.2138210 | 5.76 |
| 62 | 09-DicapTrPr-Co2Se1Se6    | -6502.2138207 | 5.76 |
| 63 | 09-DicapTrPr-Co2Se4Se2    | -6502.2138204 | 5.76 |
| 64 | 10-DicapTrPrism-Co1Se2Se1 | -6502.2138192 | 5.76 |
| 65 | 10-DicapTrPrism-Co3Se1Se5 | -6502.2138162 | 5.77 |
| 66 | 05-Bisdisph-Co2Se1Se1     | -6502.2138154 | 5.77 |
| 67 | 09-DicapTrPr-Co3Se1Se3    | -6502.2138132 | 5.77 |
| 68 | 10-DicapTrPrism-Co3Se1Se4 | -6502.2138104 | 5.77 |
| 69 | 05-Bisdisph-Co1Se1Se1     | -6502.2138064 | 5.77 |
| 70 | 04-AntiprTrig-CoSe1Se2    | -6502.2138061 | 5.77 |
| 71 | 09-DicapTrPr-Co2Se5Se2    | -6502.2138010 | 5.78 |
| 72 | 07-Tdallcap-Co2Se1Se6     | -6502.2137969 | 5.78 |
| 73 | 10-DicapTrPrism-Co2Se1Se4 | -6502.2137948 | 5.78 |
| 74 | 09-DicapTrPr-Co1Se1Se6    | -6502.2137928 | 5.78 |
| 75 | 11-DicapOh-Co3Se5Se1      | -6502.2137896 | 5.78 |
| 76 | 07-Tdallcap-Co2Se1Se1     | -6502.2137883 | 5.78 |
| 77 | 05-Bisdisph-Co1Se1Se2     | -6502.2137858 | 5.79 |
| 78 | 10-DicapTrPrism-Co3Se1Se3 | -6502.2137840 | 5.79 |
| 79 | 11-DicapOh-Co3Se2Se5      | -6502.2137753 | 5.79 |
| 80 | 01-Cube-CoSe1Se1          | -6502.2137701 | 5.80 |
| 81 | 10-DicapTrPrism-Co2Se2Se1 | -6502.2137664 | 5.80 |
| 82 | 02-Antipr-CoSe1Se2        | -6502.2137507 | 5.81 |



|     |                           |               |       |
|-----|---------------------------|---------------|-------|
| 83  | 09-DicapTrPr-Co1Se2Se5    | -6502.2137496 | 5.81  |
| 84  | 04-AntiprTrig-CoSe3Se2    | -6502.2137490 | 5.81  |
| 85  | 10-DicapTrPrism-Co2Se1Se1 | -6502.2051857 | 11.18 |
| 86  | 07-Tdallcap-Co2Se4Se2     | -6502.2051498 | 11.20 |
| 87  | 08-Nido-Co1Se1Se5         | -6502.2051488 | 11.21 |
| 88  | 09-DicapTrPr-Co1Se1Se1    | -6502.2051478 | 11.21 |
| 89  | 10-DicapTrPrism-Co3Se6Se1 | -6502.2051384 | 11.21 |
| 90  | 05-Bisdisph-Co1Se4Se3     | -6502.2051339 | 11.21 |
| 91  | 07-Tdallcap-Co1Se1Se3     | -6502.2051325 | 11.22 |
| 92  | 07-Tdallcap-Co1Se3Se2     | -6502.2051325 | 11.22 |
| 93  | 07-Tdallcap-Co1Se1Se5     | -6502.2051225 | 11.22 |
| 94  | 07-Tdallcap-Co2Se1Se2     | -6502.2051161 | 11.23 |
| 95  | 07-Tdallcap-Co2Se1Se5     | -6502.2050935 | 11.24 |
| 96  | 08-Nido-Co1Se1Se3         | -6502.2030433 | 12.53 |
| 97  | 10-DicapTrPrism-Co2Se1Se5 | -6502.2029873 | 12.56 |
| 98  | 05-Bisdisph-Co1Se3Se2     | -6502.2029868 | 12.56 |
| 99  | 07-Tdallcap-Co2Se3Se2     | -6502.2029808 | 12.57 |
| 100 | 09-DicapTrPr-Co2Se1Se2    | -6502.2029735 | 12.57 |
| 101 | 10-DicapTrPrism-Co3Se4Se3 | -6502.2029654 | 12.58 |
| 102 | 10-DicapTrPrism-Co1Se2Se4 | -6502.2029605 | 12.58 |
| 103 | 10-DicapTrPrism-Co2Se3Se1 | -6502.2029605 | 12.58 |
| 104 | 09-DicapTrPr-Co1Se3Se2    | -6502.2029581 | 12.58 |
| 105 | 10-DicapTrPrism-Co2Se3Se2 | -6502.2029576 | 12.58 |
| 106 | 09-DicapTrPr-Co3Se4Se2    | -6502.2029525 | 12.58 |
| 107 | 07-Tdallcap-Co2Se1Se3     | -6502.2029505 | 12.58 |
| 108 | 07-Tdallcap-Co2Se2Se3     | -6502.2029505 | 12.58 |
| 109 | 07-Tdallcap-Co1Se1Se4     | -6502.2029501 | 12.58 |
| 110 | 11-DicapOh-Co1Se1Se2      | -6502.2029486 | 12.59 |
| 111 | 08-Nido-Co1Se3Se3         | -6502.2029471 | 12.59 |
| 112 | 09-DicapTrPr-Co2Se2Se3    | -6502.2029461 | 12.59 |
| 113 | 10-DicapTrPrism-Co3Se2Se2 | -6502.2029421 | 12.59 |
| 114 | 10-DicapTrPrism-Co3Se3Se3 | -6502.2029412 | 12.59 |
| 115 | 03-TrigPyr-CoSe2Se3       | -6502.2029347 | 12.59 |
| 116 | 07-Tdallcap-Co1Se4Se1     | -6502.2029342 | 12.59 |
| 117 | 05-Bisdisph-Co1Se1Se4     | -6502.2029336 | 12.60 |
| 118 | 07-Tdallcap-Co1Se1Se2     | -6502.2029329 | 12.60 |
| 119 | 10-DicapTrPrism-Co2Se2Se4 | -6502.2029305 | 12.60 |
| 120 | 09-DicapTrPr-Co2Se2Se2    | -6502.2029256 | 12.60 |
| 121 | 05-Bisdisph-Co2Se2Se2     | -6502.2029251 | 12.60 |
| 122 | 09-DicapTrPr-Co1Se2Se3    | -6502.2029250 | 12.60 |
| 123 | 10-DicapTrPrism-Co1Se3Se4 | -6502.2029072 | 12.61 |
| 124 | 04-AntiprTrig-CoSe3Se1    | -6502.2029041 | 12.61 |
| 125 | 11-DicapOh-Co2Se2Se3      | -6502.2028999 | 12.62 |

|     |                           |               |       |
|-----|---------------------------|---------------|-------|
| 126 | 02-Antipr-CoSe3Se3        | -6502.2028930 | 12.62 |
| 127 | 07-Tdallcap-Co1Se2Se3     | -6502.2028853 | 12.63 |
| 128 | 07-Tdallcap-Co2Se1Se4     | -6502.2028522 | 12.65 |
| 129 | 05-Bisdisph-Co1Se4Se2     | -6502.2005913 | 14.07 |
| 130 | 09-DicapTrPr-Co2Se5Se1    | -6502.2005709 | 14.08 |
| 131 | 09-DicapTrPr-Co2Se3Se4    | -6502.2005559 | 14.09 |
| 132 | 04-AntiprTrig-CoSe2Se2    | -6502.2005489 | 14.09 |
| 133 | 02-Antipr-CoSe1Se5        | -6502.2005451 | 14.09 |
| 134 | 08-Nido-Co2Se1Se2         | -6502.2005416 | 14.10 |
| 135 | 11-DicapOh-Co2Se1Se4      | -6502.2005269 | 14.11 |
| 136 | 08-Nido-Co2Se3Se1         | -6502.2004957 | 14.13 |
| 137 | 08-Nido-Co2Se3Se4         | -6502.2004885 | 14.13 |
| 138 | 10-DicapTrPrism-Co3Se3Se2 | -6502.2004761 | 14.14 |
| 139 | 11-DicapOh-Co3Se4Se2      | -6502.1989597 | 15.09 |
| 140 | 05-Bisdisph-Co2Se2Se5     | -6502.1989566 | 15.09 |
| 141 | 10-DicapTrPrism-Co1Se2Se3 | -6502.1989525 | 15.09 |
| 142 | 05-Bisdisph-Co2Se1Se2     | -6502.1989520 | 15.09 |
| 143 | 08-Nido-Co2Se2Se1         | -6502.1989419 | 15.10 |
| 144 | 10-DicapTrPrism-Co3Se1Se2 | -6502.1989272 | 15.11 |
| 145 | 10-DicapTrPrism-Co3Se1Se1 | -6502.1989254 | 15.11 |
| 146 | 10-DicapTrPrism-Co2Se2Se3 | -6502.1989102 | 15.12 |
| 147 | 06-Bipirhex-Co1Se1Se2     | -6502.1989097 | 15.12 |
| 148 | 10-DicapTrPrism-Co3Se4Se1 | -6502.1955005 | 17.26 |
| 149 | 10-DicapTrPrism-Co2Se1Se3 | -6502.1954396 | 17.30 |
| 150 | 05-Bisdisph-Co2Se4Se1     | -6502.1954225 | 17.31 |
| 151 | 05-Bisdisph-Co2Se2Se4     | -6502.1954188 | 17.31 |
| 152 | 10-DicapTrPrism-Co1Se1Se3 | -6502.1954170 | 17.31 |
| 153 | 02-Antipr-CoSe2Se2        | -6502.1954160 | 17.31 |
| 154 | 09-DicapTrPr-Co2Se6Se1    | -6502.1953962 | 17.33 |
| 155 | 10-DicapTrPrism-Co1Se1Se4 | -6502.1953841 | 17.33 |
| 156 | 09-DicapTrPr-Co2Se2Se4    | -6502.1953812 | 17.33 |
| 157 | 10-DicapTrPrism-Co1Se3Se3 | -6502.1953807 | 17.33 |
| 158 | 05-Bisdisph-Co2Se3Se2     | -6502.1927158 | 19.01 |
| 159 | 11-DicapOh-Co1Se2Se2      | -6502.1926963 | 19.02 |
| 160 | 04-AntiprTrig-CoSe2Se4    | -6502.1926907 | 19.02 |
| 161 | 10-DicapTrPrism-Co3Se2Se5 | -6502.1926904 | 19.02 |
| 162 | 02-Antipr-CoSe2Se1        | -6502.1926901 | 19.02 |
| 163 | 10-DicapTrPrism-Co3Se3Se4 | -6502.1926870 | 19.03 |
| 164 | 09-DicapTrPr-Co2Se2Se1    | -6502.1926850 | 19.03 |
| 165 | 05-Bisdisph-Co1Se2Se2     | -6502.1926831 | 19.03 |
| 166 | 11-DicapOh-Co3Se4Se3      | -6502.1926781 | 19.03 |
| 167 | 09-DicapTrPr-Co2Se3Se1    | -6502.1926684 | 19.04 |
| 168 | 06-Bipirhex-Co2Se3Se2     | -6502.1926666 | 19.04 |

|     |                           |               |       |
|-----|---------------------------|---------------|-------|
| 169 | 02-Antipr-CoSe3Se1        | -6502.1926555 | 19.05 |
| 170 | 10-DicapTrPrism-Co1Se3Se1 | -6502.1926554 | 19.05 |
| 171 | 05-Bisdisph-Co2Se2Se6     | -6502.1926482 | 19.05 |
| 172 | 08-Nido-Co2Se3Se3         | -6502.1918853 | 19.53 |
| 173 | 10-DicapTrPrism-Co1Se3Se2 | -6502.1918566 | 19.55 |
| 174 | 05-Bisdisph-Co2Se1Se4     | -6502.1860466 | 23.19 |
| 175 | 02-Antipr-CoSe1Se4        | -6502.1860407 | 23.20 |
| 176 | 09-DicapTrPr-Co3Se1Se4    | -6502.1860398 | 23.20 |
| 177 | 10-DicapTrPrism-Co1Se2Se2 | -6502.1860351 | 23.20 |
| 178 | 08-Nido-Co2Se1Se5         | -6502.1860315 | 23.20 |
| 179 | 10-DicapTrPrism-Co1Se1Se5 | -6502.1860066 | 23.22 |
| 180 | 08-Nido-Co2Se4Se2         | -6502.1859770 | 23.24 |
| 181 | 09-DicapTrPr-Co1Se1Se5    | -6502.1840926 | 24.42 |
| 182 | 05-Bisdisph-Co1Se5Se1     | -6502.1840805 | 24.43 |
| 183 | 08-Nido-Co1Se2Se5         | -6502.1795477 | 27.27 |
| 184 | 08-Nido-Co1Se1Se6         | -6502.1768745 | 28.95 |
| 185 | 10-DicapTrPrism-Co3Se5Se2 | -6502.1768261 | 28.98 |
| 186 | 09-DicapTrPr-Co1Se1Se3    | -6502.1759791 | 29.51 |
| 187 | 06-Bipirhex-Co2Se1Se3     | -6502.1759219 | 29.55 |
| 188 | 11-DicapOh-Co3Se1Se2      | -6502.1759199 | 29.55 |
| 189 | 09-DicapTrPr-Co3Se1Se6    | -6502.1746292 | 30.36 |
| 190 | 09-DicapTrPr-Co3Se3Se2    | -6502.1746085 | 30.37 |
| 191 | 11-DicapOh-Co3Se6Se1      | -6502.1740217 | 30.74 |
| 192 | 07-Tdallcap-Co1Se1Se1     | -6502.1739737 | 30.77 |
| 193 | 04-AntiprTrig-CoSe1Se1    | -6502.1738666 | 30.84 |
| 194 | 09-DicapTrPr-Co1Se1Se4    | -6502.1738582 | 30.84 |
| 195 | 01-Cube-CoSe1Se2          | -6502.1738439 | 30.85 |
| 196 | 11-DicapOh-Co2Se1Se1      | -6502.1738346 | 30.86 |
| 197 | 10-DicapTrPrism-Co3Se3Se1 | -6502.1738275 | 30.86 |
| 198 | 05-Bisdisph-Co2Se2Se3     | -6502.1732407 | 31.23 |
| 199 | 02-Antipr-CoSe1Se1        | -6502.1732275 | 31.24 |
| 200 | 08-Nido-Co2Se3Se2         | -6502.1724913 | 31.70 |
| 201 | 09-DicapTrPr-Co2Se4Se3    | -6502.1724818 | 31.70 |
| 202 | 08-Nido-Co1Se1Se4         | -6502.1724743 | 31.71 |
| 203 | 04-AntiprTrig-CoSe2Se1    | -6502.1724691 | 31.71 |
| 204 | 09-DicapTrPr-Co2Se1Se5    | -6502.1724605 | 31.72 |
| 205 | 03-TrigPyr-CoSe1Se3       | -6502.1724541 | 31.72 |
| 206 | 08-Nido-Co2Se4Se3         | -6502.1724521 | 31.72 |
| 207 | 09-DicapTrPr-Co2Se1Se3    | -6502.1724482 | 31.73 |
| 208 | 08-Nido-Co1Se2Se1         | -6502.1724414 | 31.73 |
| 209 | 11-DicapOh-Co3Se5Se2      | -6502.1724403 | 31.73 |
| 210 | 06-Bipirhex-Co2Se1Se2     | -6502.1723145 | 31.81 |
| 211 | 11-DicapOh-Co3Se2Se3      | -6502.1722678 | 31.84 |

|     |                           |               |       |
|-----|---------------------------|---------------|-------|
| 212 | 03-TrigPyr-CoSe1Se4       | -6502.1722108 | 31.87 |
| 213 | 09-DicapTrPr-Co3Se3Se4    | -6502.1703942 | 33.01 |
| 214 | 11-DicapOh-Co3Se3Se2      | -6502.1703073 | 33.07 |
| 215 | 03-TrigPyr-CoSe2Se1       | -6502.1694373 | 33.61 |
| 216 | 08-Nido-Co1Se3Se1         | -6502.1660636 | 35.73 |
| 217 | 07-Tdallcap-Co1Se3Se1     | -6502.1660606 | 35.73 |
| 218 | 06-Bipirhex-Co1Se1Se4     | -6502.1660457 | 35.74 |
| 219 | 07-Tdallcap-Co2Se2Se1     | -6502.1660389 | 35.75 |
| 220 | 07-Tdallcap-Co1Se2Se1     | -6502.1660325 | 35.75 |
| 221 | 07-Tdallcap-Co2Se2Se2     | -6502.1660085 | 35.77 |
| 222 | 05-Bisdisph-Co2Se3Se1     | -6502.1658310 | 35.88 |
| 223 | 08-Nido-Co2Se1Se4         | -6502.1658301 | 35.88 |
| 224 | 11-DicapOh-Co3Se2Se2      | -6502.1658172 | 35.89 |
| 225 | 10-DicapTrPrism-Co1Se1Se2 | -6502.1657692 | 35.92 |
| 226 | 06-Bipirhex-Co2Se1Se1     | -6502.1644709 | 36.73 |
| 227 | 11-DicapOh-Co3Se1Se1      | -6502.1644512 | 36.74 |
| 228 | 11-DicapOh-Co2Se2Se1      | -6502.1637197 | 37.20 |
| 229 | 08-Nido-Co1Se1Se1         | -6502.1628481 | 37.75 |
| 230 | 11-DicapOh-Co3Se1Se3      | -6502.1628245 | 37.76 |
| 231 | 09-DicapTrPr-Co3Se1Se2    | -6502.1628040 | 37.78 |
| 232 | 11-DicapOh-Co2Se2Se2      | -6502.1627847 | 37.79 |
| 233 | 09-DicapTrPr-Co1Se1Se2    | -6502.1621951 | 38.16 |
| 234 | 05-Bisdisph-Co1Se1Se3     | -6502.1608422 | 39.01 |
| 235 | 08-Nido-Co1Se2Se4         | -6502.1608067 | 39.03 |
| 236 | 11-DicapOh-Co1Se1Se1      | -6502.1608022 | 39.03 |
| 237 | 06-Bipirhex-Co1Se1Se1     | -6502.1607590 | 39.06 |
| 238 | 08-Nido-Co1Se2Se2         | -6502.1559611 | 42.07 |
| 239 | 05-Bisdisph-Co2Se1Se3     | -6502.1557042 | 42.23 |
| 240 | 11-DicapOh-Co3Se1Se5      | -6502.1556953 | 42.24 |
| 241 | 10-DicapTrPrism-Co3Se1Se6 | -6502.1556876 | 42.24 |
| 242 | 10-DicapTrPrism-Co2Se2Se2 | -6502.1551622 | 42.57 |
| 243 | 09-DicapTrPr-Co3Se2Se4    | -6502.1551416 | 42.59 |
| 244 | 01-Cube-CoSe1Se3          | -6502.1551377 | 42.59 |
| 245 | 06-Bipirhex-Co1Se1Se3     | -6502.1551197 | 42.60 |
| 246 | 04-AntiprTrig-CoSe1Se4    | -6502.1550953 | 42.61 |
| 247 | 11-DicapOh-Co3Se2Se4      | -6502.1550880 | 42.62 |
| 248 | 03-TrigPyr-CoSe2Se2       | -6502.1550033 | 42.67 |
| 249 | 09-DicapTrPr-Co3Se3Se1    | -6502.1539735 | 43.32 |
| 250 | 09-DicapTrPr-Co3Se5Se1    | -6502.1531210 | 43.85 |
| 251 | 11-DicapOh-Co3Se2Se1      | -6502.1530758 | 43.88 |
| 252 | 11-DicapOh-Co2Se1Se2      | -6502.1530511 | 43.90 |
| 253 | 11-DicapOh-Co3Se4Se1      | -6502.1520762 | 44.51 |
| 254 | 06-Bipirhex-Co2Se2Se2     | -6502.1519890 | 44.56 |

|     |                           |               |       |
|-----|---------------------------|---------------|-------|
| 255 | 09-DicapTrPr-Co3Se2Se5    | -6502.1518963 | 44.62 |
| 256 | 09-DicapTrPr-Co3Se4Se1    | -6502.1508665 | 45.27 |
| 257 | 11-DicapOh-Co1Se1Se6      | -6502.1504695 | 45.52 |
| 258 | 08-Nido-Co1Se3Se2         | -6502.1502884 | 45.63 |
| 259 | 03-TrigPyr-CoSe4Se1       | -6502.1502778 | 45.64 |
| 260 | 03-TrigPyr-CoSe1Se5       | -6502.1502464 | 45.66 |
| 261 | 08-Nido-Co1Se2Se3         | -6502.1502413 | 45.66 |
| 262 | 09-DicapTrPr-Co1Se2Se1    | -6502.1466411 | 47.92 |
| 263 | 03-TrigPyr-CoSe1Se1       | -6502.1463196 | 48.12 |
| 264 | 03-TrigPyr-CoSe1Se6       | -6502.1438974 | 49.64 |
| 265 | 09-DicapTrPr-Co3Se6Se1    | -6502.1426790 | 50.41 |
| 266 | 11-DicapOh-Co3Se1Se4      | -6502.1420086 | 50.83 |
| 267 | 11-DicapOh-Co3Se3Se1      | -6502.1414508 | 51.18 |
| 268 | 11-DicapOh-Co3Se3Se4      | -6502.1411862 | 51.34 |
| 269 | 10-DicapTrPrism-Co2Se3Se3 | -6502.1405161 | 51.76 |
| 270 | 05-Bisdisph-Co1Se2Se1     | -6502.1404736 | 51.79 |
| 271 | 08-Nido-Co2Se1Se3         | -6502.1374072 | 53.71 |
| 272 | 09-DicapTrPr-Co2Se4Se1    | -6502.1361119 | 54.53 |
| 273 | 06-Bipirhex-Co2Se2Se4     | -6502.1334797 | 56.18 |
| 274 | 06-Bipirhex-Co2Se3Se1     | -6502.1326151 | 56.72 |
| 275 | 11-DicapOh-Co3Se1Se6      | -6502.1314864 | 57.43 |
| 276 | 04-AntiprTrig-CoSe3Se3    | -6502.1299256 | 58.41 |
| 277 | 06-Bipirhex-Co2Se1Se4     | -6502.1268017 | 60.37 |
| 278 | 05-Bisdisph-Co2Se2Se1     | -6502.1258017 | 61.00 |
| 279 | 01-Cube-CoSe2Se2          | -6502.1223573 | 63.16 |
| 280 | 03-TrigPyr-CoSe3Se1       | -6502.1184648 | 65.60 |
| 281 | 03-TrigPyr-CoSe3Se2       | -6502.0931377 | 81.49 |
| 282 | 09-DicapTrPr-Co3Se2Se2    | -6502.0853685 | 86.37 |

Table S2A. Initial CpCoSe<sub>2</sub>B<sub>6</sub>H<sub>6</sub> structures, 215 structures.

| <b>Initial structures</b>                                                                                                                             |
|-------------------------------------------------------------------------------------------------------------------------------------------------------|
| 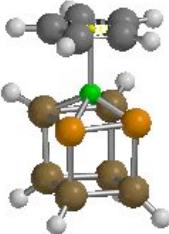 <p>1. Capped cube 43 structures</p>                                 |
|  <p>2. Pressed capped cube 67 structures</p>                         |
|  <p>3. Tl<sub>9</sub><sup>9-</sup>-like structure 79 structures</p> |
|  <p>4. Tricapped trigonal prism 26 structures</p>                  |

Table S2B. Distance table for the lowest-lying CpCoSe<sub>2</sub>B<sub>6</sub>H<sub>6</sub> structures after M06L/6-311G(d,p) optimization. Included are the ZPcorrected E (a.u.), relative energy (kcal/mol) and symmetry. For clarity only the atoms forming the cluster framework are presented.

| 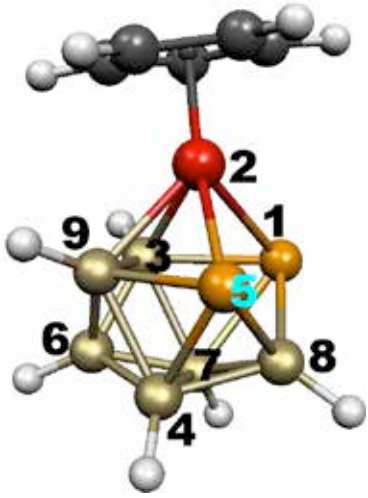 <p>1. -6531.8871054 0.0 C<sub>s</sub></p>    | <table border="1"> <thead> <tr> <th></th> <th>1</th> <th>2</th> <th>3</th> <th>4</th> <th>5</th> </tr> </thead> <tbody> <tr><td>1 Se</td><td>0.000000</td><td></td><td></td><td></td><td></td></tr> <tr><td>2 Co</td><td>2.352837</td><td>0.000000</td><td></td><td></td><td></td></tr> <tr><td>3 B</td><td>2.129942</td><td>2.120060</td><td>0.000000</td><td></td><td></td></tr> <tr><td>4 B</td><td>3.183805</td><td>3.351334</td><td>2.641395</td><td>0.000000</td><td></td></tr> <tr><td>5 Se</td><td>3.145552</td><td>2.352868</td><td>3.208503</td><td>2.145821</td><td>0.000000</td></tr> <tr><td>6 B</td><td>3.234671</td><td>3.290181</td><td>1.689139</td><td>1.678917</td><td>3.234541</td></tr> <tr><td>7 B</td><td>2.146358</td><td>3.351710</td><td>1.938912</td><td>1.758330</td><td>3.183807</td></tr> <tr><td>8 B</td><td>2.059509</td><td>3.064007</td><td>2.894639</td><td>1.806660</td><td>2.059438</td></tr> <tr><td>9 B</td><td>3.208538</td><td>2.120039</td><td>1.830490</td><td>1.938582</td><td>2.129963</td></tr> <tr> <td></td> <td>6</td> <td>7</td> <td>8</td> <td>9</td> <td></td> </tr> <tr><td>6 B</td><td>0.000000</td><td></td><td></td><td></td><td></td></tr> <tr><td>7 B</td><td>1.678937</td><td>0.000000</td><td></td><td></td><td></td></tr> <tr><td>8 B</td><td>2.900293</td><td>1.806688</td><td>0.000000</td><td></td><td></td></tr> <tr><td>9 B</td><td>1.689071</td><td>2.641538</td><td>2.894680</td><td>0.000000</td><td></td></tr> </tbody> </table> |          | 1        | 2        | 3        | 4 | 5 | 1 Se | 0.000000 |  |  |  |  | 2 Co | 2.352837 | 0.000000 |  |  |  | 3 B  | 2.129942 | 2.120060 | 0.000000 |  |  | 4 B  | 3.183805 | 3.351334 | 2.641395 | 0.000000 |  | 5 Se | 3.145552 | 2.352868 | 3.208503 | 2.145821 | 0.000000 | 6 B | 3.234671 | 3.290181 | 1.689139 | 1.678917 | 3.234541 | 7 B | 2.146358 | 3.351710 | 1.938912 | 1.758330 | 3.183807 | 8 B  | 2.059509 | 3.064007 | 2.894639 | 1.806660 | 2.059438 | 9 B  | 3.208538 | 2.120039 | 1.830490 | 1.938582 | 2.129963 |  | 6 | 7 | 8 | 9 |  | 6 B | 0.000000 |          |  |  |  | 7 B  | 1.678937 | 0.000000 |          |  |  | 8 B  | 2.900293 | 1.806688 | 0.000000 |          |  | 9 B | 1.689071 | 2.641538 | 2.894680 | 0.000000 |  |
|--------------------------------------------------------------------------------------------------------------------------------|--------------------------------------------------------------------------------------------------------------------------------------------------------------------------------------------------------------------------------------------------------------------------------------------------------------------------------------------------------------------------------------------------------------------------------------------------------------------------------------------------------------------------------------------------------------------------------------------------------------------------------------------------------------------------------------------------------------------------------------------------------------------------------------------------------------------------------------------------------------------------------------------------------------------------------------------------------------------------------------------------------------------------------------------------------------------------------------------------------------------------------------------------------------------------------------------------------------------------------------------------------------------------------------------------------------------------------------------------------------------------------------------------------------------------------------------------------------------------------------------------------|----------|----------|----------|----------|---|---|------|----------|--|--|--|--|------|----------|----------|--|--|--|------|----------|----------|----------|--|--|------|----------|----------|----------|----------|--|------|----------|----------|----------|----------|----------|-----|----------|----------|----------|----------|----------|-----|----------|----------|----------|----------|----------|------|----------|----------|----------|----------|----------|------|----------|----------|----------|----------|----------|--|---|---|---|---|--|-----|----------|----------|--|--|--|------|----------|----------|----------|--|--|------|----------|----------|----------|----------|--|-----|----------|----------|----------|----------|--|
|                                                                                                                                | 1                                                                                                                                                                                                                                                                                                                                                                                                                                                                                                                                                                                                                                                                                                                                                                                                                                                                                                                                                                                                                                                                                                                                                                                                                                                                                                                                                                                                                                                                                                      | 2        | 3        | 4        | 5        |   |   |      |          |  |  |  |  |      |          |          |  |  |  |      |          |          |          |  |  |      |          |          |          |          |  |      |          |          |          |          |          |     |          |          |          |          |          |     |          |          |          |          |          |      |          |          |          |          |          |      |          |          |          |          |          |  |   |   |   |   |  |     |          |          |  |  |  |      |          |          |          |  |  |      |          |          |          |          |  |     |          |          |          |          |  |
| 1 Se                                                                                                                           | 0.000000                                                                                                                                                                                                                                                                                                                                                                                                                                                                                                                                                                                                                                                                                                                                                                                                                                                                                                                                                                                                                                                                                                                                                                                                                                                                                                                                                                                                                                                                                               |          |          |          |          |   |   |      |          |  |  |  |  |      |          |          |  |  |  |      |          |          |          |  |  |      |          |          |          |          |  |      |          |          |          |          |          |     |          |          |          |          |          |     |          |          |          |          |          |      |          |          |          |          |          |      |          |          |          |          |          |  |   |   |   |   |  |     |          |          |  |  |  |      |          |          |          |  |  |      |          |          |          |          |  |     |          |          |          |          |  |
| 2 Co                                                                                                                           | 2.352837                                                                                                                                                                                                                                                                                                                                                                                                                                                                                                                                                                                                                                                                                                                                                                                                                                                                                                                                                                                                                                                                                                                                                                                                                                                                                                                                                                                                                                                                                               | 0.000000 |          |          |          |   |   |      |          |  |  |  |  |      |          |          |  |  |  |      |          |          |          |  |  |      |          |          |          |          |  |      |          |          |          |          |          |     |          |          |          |          |          |     |          |          |          |          |          |      |          |          |          |          |          |      |          |          |          |          |          |  |   |   |   |   |  |     |          |          |  |  |  |      |          |          |          |  |  |      |          |          |          |          |  |     |          |          |          |          |  |
| 3 B                                                                                                                            | 2.129942                                                                                                                                                                                                                                                                                                                                                                                                                                                                                                                                                                                                                                                                                                                                                                                                                                                                                                                                                                                                                                                                                                                                                                                                                                                                                                                                                                                                                                                                                               | 2.120060 | 0.000000 |          |          |   |   |      |          |  |  |  |  |      |          |          |  |  |  |      |          |          |          |  |  |      |          |          |          |          |  |      |          |          |          |          |          |     |          |          |          |          |          |     |          |          |          |          |          |      |          |          |          |          |          |      |          |          |          |          |          |  |   |   |   |   |  |     |          |          |  |  |  |      |          |          |          |  |  |      |          |          |          |          |  |     |          |          |          |          |  |
| 4 B                                                                                                                            | 3.183805                                                                                                                                                                                                                                                                                                                                                                                                                                                                                                                                                                                                                                                                                                                                                                                                                                                                                                                                                                                                                                                                                                                                                                                                                                                                                                                                                                                                                                                                                               | 3.351334 | 2.641395 | 0.000000 |          |   |   |      |          |  |  |  |  |      |          |          |  |  |  |      |          |          |          |  |  |      |          |          |          |          |  |      |          |          |          |          |          |     |          |          |          |          |          |     |          |          |          |          |          |      |          |          |          |          |          |      |          |          |          |          |          |  |   |   |   |   |  |     |          |          |  |  |  |      |          |          |          |  |  |      |          |          |          |          |  |     |          |          |          |          |  |
| 5 Se                                                                                                                           | 3.145552                                                                                                                                                                                                                                                                                                                                                                                                                                                                                                                                                                                                                                                                                                                                                                                                                                                                                                                                                                                                                                                                                                                                                                                                                                                                                                                                                                                                                                                                                               | 2.352868 | 3.208503 | 2.145821 | 0.000000 |   |   |      |          |  |  |  |  |      |          |          |  |  |  |      |          |          |          |  |  |      |          |          |          |          |  |      |          |          |          |          |          |     |          |          |          |          |          |     |          |          |          |          |          |      |          |          |          |          |          |      |          |          |          |          |          |  |   |   |   |   |  |     |          |          |  |  |  |      |          |          |          |  |  |      |          |          |          |          |  |     |          |          |          |          |  |
| 6 B                                                                                                                            | 3.234671                                                                                                                                                                                                                                                                                                                                                                                                                                                                                                                                                                                                                                                                                                                                                                                                                                                                                                                                                                                                                                                                                                                                                                                                                                                                                                                                                                                                                                                                                               | 3.290181 | 1.689139 | 1.678917 | 3.234541 |   |   |      |          |  |  |  |  |      |          |          |  |  |  |      |          |          |          |  |  |      |          |          |          |          |  |      |          |          |          |          |          |     |          |          |          |          |          |     |          |          |          |          |          |      |          |          |          |          |          |      |          |          |          |          |          |  |   |   |   |   |  |     |          |          |  |  |  |      |          |          |          |  |  |      |          |          |          |          |  |     |          |          |          |          |  |
| 7 B                                                                                                                            | 2.146358                                                                                                                                                                                                                                                                                                                                                                                                                                                                                                                                                                                                                                                                                                                                                                                                                                                                                                                                                                                                                                                                                                                                                                                                                                                                                                                                                                                                                                                                                               | 3.351710 | 1.938912 | 1.758330 | 3.183807 |   |   |      |          |  |  |  |  |      |          |          |  |  |  |      |          |          |          |  |  |      |          |          |          |          |  |      |          |          |          |          |          |     |          |          |          |          |          |     |          |          |          |          |          |      |          |          |          |          |          |      |          |          |          |          |          |  |   |   |   |   |  |     |          |          |  |  |  |      |          |          |          |  |  |      |          |          |          |          |  |     |          |          |          |          |  |
| 8 B                                                                                                                            | 2.059509                                                                                                                                                                                                                                                                                                                                                                                                                                                                                                                                                                                                                                                                                                                                                                                                                                                                                                                                                                                                                                                                                                                                                                                                                                                                                                                                                                                                                                                                                               | 3.064007 | 2.894639 | 1.806660 | 2.059438 |   |   |      |          |  |  |  |  |      |          |          |  |  |  |      |          |          |          |  |  |      |          |          |          |          |  |      |          |          |          |          |          |     |          |          |          |          |          |     |          |          |          |          |          |      |          |          |          |          |          |      |          |          |          |          |          |  |   |   |   |   |  |     |          |          |  |  |  |      |          |          |          |  |  |      |          |          |          |          |  |     |          |          |          |          |  |
| 9 B                                                                                                                            | 3.208538                                                                                                                                                                                                                                                                                                                                                                                                                                                                                                                                                                                                                                                                                                                                                                                                                                                                                                                                                                                                                                                                                                                                                                                                                                                                                                                                                                                                                                                                                               | 2.120039 | 1.830490 | 1.938582 | 2.129963 |   |   |      |          |  |  |  |  |      |          |          |  |  |  |      |          |          |          |  |  |      |          |          |          |          |  |      |          |          |          |          |          |     |          |          |          |          |          |     |          |          |          |          |          |      |          |          |          |          |          |      |          |          |          |          |          |  |   |   |   |   |  |     |          |          |  |  |  |      |          |          |          |  |  |      |          |          |          |          |  |     |          |          |          |          |  |
|                                                                                                                                | 6                                                                                                                                                                                                                                                                                                                                                                                                                                                                                                                                                                                                                                                                                                                                                                                                                                                                                                                                                                                                                                                                                                                                                                                                                                                                                                                                                                                                                                                                                                      | 7        | 8        | 9        |          |   |   |      |          |  |  |  |  |      |          |          |  |  |  |      |          |          |          |  |  |      |          |          |          |          |  |      |          |          |          |          |          |     |          |          |          |          |          |     |          |          |          |          |          |      |          |          |          |          |          |      |          |          |          |          |          |  |   |   |   |   |  |     |          |          |  |  |  |      |          |          |          |  |  |      |          |          |          |          |  |     |          |          |          |          |  |
| 6 B                                                                                                                            | 0.000000                                                                                                                                                                                                                                                                                                                                                                                                                                                                                                                                                                                                                                                                                                                                                                                                                                                                                                                                                                                                                                                                                                                                                                                                                                                                                                                                                                                                                                                                                               |          |          |          |          |   |   |      |          |  |  |  |  |      |          |          |  |  |  |      |          |          |          |  |  |      |          |          |          |          |  |      |          |          |          |          |          |     |          |          |          |          |          |     |          |          |          |          |          |      |          |          |          |          |          |      |          |          |          |          |          |  |   |   |   |   |  |     |          |          |  |  |  |      |          |          |          |  |  |      |          |          |          |          |  |     |          |          |          |          |  |
| 7 B                                                                                                                            | 1.678937                                                                                                                                                                                                                                                                                                                                                                                                                                                                                                                                                                                                                                                                                                                                                                                                                                                                                                                                                                                                                                                                                                                                                                                                                                                                                                                                                                                                                                                                                               | 0.000000 |          |          |          |   |   |      |          |  |  |  |  |      |          |          |  |  |  |      |          |          |          |  |  |      |          |          |          |          |  |      |          |          |          |          |          |     |          |          |          |          |          |     |          |          |          |          |          |      |          |          |          |          |          |      |          |          |          |          |          |  |   |   |   |   |  |     |          |          |  |  |  |      |          |          |          |  |  |      |          |          |          |          |  |     |          |          |          |          |  |
| 8 B                                                                                                                            | 2.900293                                                                                                                                                                                                                                                                                                                                                                                                                                                                                                                                                                                                                                                                                                                                                                                                                                                                                                                                                                                                                                                                                                                                                                                                                                                                                                                                                                                                                                                                                               | 1.806688 | 0.000000 |          |          |   |   |      |          |  |  |  |  |      |          |          |  |  |  |      |          |          |          |  |  |      |          |          |          |          |  |      |          |          |          |          |          |     |          |          |          |          |          |     |          |          |          |          |          |      |          |          |          |          |          |      |          |          |          |          |          |  |   |   |   |   |  |     |          |          |  |  |  |      |          |          |          |  |  |      |          |          |          |          |  |     |          |          |          |          |  |
| 9 B                                                                                                                            | 1.689071                                                                                                                                                                                                                                                                                                                                                                                                                                                                                                                                                                                                                                                                                                                                                                                                                                                                                                                                                                                                                                                                                                                                                                                                                                                                                                                                                                                                                                                                                               | 2.641538 | 2.894680 | 0.000000 |          |   |   |      |          |  |  |  |  |      |          |          |  |  |  |      |          |          |          |  |  |      |          |          |          |          |  |      |          |          |          |          |          |     |          |          |          |          |          |     |          |          |          |          |          |      |          |          |          |          |          |      |          |          |          |          |          |  |   |   |   |   |  |     |          |          |  |  |  |      |          |          |          |  |  |      |          |          |          |          |  |     |          |          |          |          |  |
|  <p>2. -6531.8833833 +2.3 C<sub>1</sub></p>  | <table border="1"> <thead> <tr> <th></th> <th>1</th> <th>2</th> <th>3</th> <th>4</th> <th>5</th> </tr> </thead> <tbody> <tr><td>1 B</td><td>0.000000</td><td></td><td></td><td></td><td></td></tr> <tr><td>2 B</td><td>1.774860</td><td>0.000000</td><td></td><td></td><td></td></tr> <tr><td>3 Se</td><td>2.945744</td><td>3.160158</td><td>0.000000</td><td></td><td></td></tr> <tr><td>4 B</td><td>2.870018</td><td>1.833361</td><td>2.079919</td><td>0.000000</td><td></td></tr> <tr><td>5 Se</td><td>3.214196</td><td>2.053149</td><td>3.372368</td><td>2.001632</td><td>0.000000</td></tr> <tr><td>6 B</td><td>1.803037</td><td>1.760679</td><td>2.153578</td><td>1.808327</td><td>3.245121</td></tr> <tr><td>7 B</td><td>1.712140</td><td>2.965138</td><td>2.059910</td><td>3.092543</td><td>4.109953</td></tr> <tr><td>8 B</td><td>1.734855</td><td>1.872866</td><td>3.247367</td><td>2.805863</td><td>2.025184</td></tr> <tr><td>9 Co</td><td>2.094140</td><td>3.211452</td><td>2.400384</td><td>3.378805</td><td>3.452256</td></tr> <tr> <td></td> <td>6</td> <td>7</td> <td>8</td> <td>9</td> <td></td> </tr> <tr><td>7 B</td><td>1.789882</td><td>0.000000</td><td></td><td></td><td></td></tr> <tr><td>8 B</td><td>2.855756</td><td>2.967660</td><td>0.000000</td><td></td><td></td></tr> <tr><td>9 Co</td><td>2.998042</td><td>1.955886</td><td>2.042292</td><td>0.000000</td><td></td></tr> </tbody> </table>                                                                           |          | 1        | 2        | 3        | 4 | 5 | 1 B  | 0.000000 |  |  |  |  | 2 B  | 1.774860 | 0.000000 |  |  |  | 3 Se | 2.945744 | 3.160158 | 0.000000 |  |  | 4 B  | 2.870018 | 1.833361 | 2.079919 | 0.000000 |  | 5 Se | 3.214196 | 2.053149 | 3.372368 | 2.001632 | 0.000000 | 6 B | 1.803037 | 1.760679 | 2.153578 | 1.808327 | 3.245121 | 7 B | 1.712140 | 2.965138 | 2.059910 | 3.092543 | 4.109953 | 8 B  | 1.734855 | 1.872866 | 3.247367 | 2.805863 | 2.025184 | 9 Co | 2.094140 | 3.211452 | 2.400384 | 3.378805 | 3.452256 |  | 6 | 7 | 8 | 9 |  | 7 B | 1.789882 | 0.000000 |  |  |  | 8 B  | 2.855756 | 2.967660 | 0.000000 |  |  | 9 Co | 2.998042 | 1.955886 | 2.042292 | 0.000000 |  |     |          |          |          |          |  |
|                                                                                                                                | 1                                                                                                                                                                                                                                                                                                                                                                                                                                                                                                                                                                                                                                                                                                                                                                                                                                                                                                                                                                                                                                                                                                                                                                                                                                                                                                                                                                                                                                                                                                      | 2        | 3        | 4        | 5        |   |   |      |          |  |  |  |  |      |          |          |  |  |  |      |          |          |          |  |  |      |          |          |          |          |  |      |          |          |          |          |          |     |          |          |          |          |          |     |          |          |          |          |          |      |          |          |          |          |          |      |          |          |          |          |          |  |   |   |   |   |  |     |          |          |  |  |  |      |          |          |          |  |  |      |          |          |          |          |  |     |          |          |          |          |  |
| 1 B                                                                                                                            | 0.000000                                                                                                                                                                                                                                                                                                                                                                                                                                                                                                                                                                                                                                                                                                                                                                                                                                                                                                                                                                                                                                                                                                                                                                                                                                                                                                                                                                                                                                                                                               |          |          |          |          |   |   |      |          |  |  |  |  |      |          |          |  |  |  |      |          |          |          |  |  |      |          |          |          |          |  |      |          |          |          |          |          |     |          |          |          |          |          |     |          |          |          |          |          |      |          |          |          |          |          |      |          |          |          |          |          |  |   |   |   |   |  |     |          |          |  |  |  |      |          |          |          |  |  |      |          |          |          |          |  |     |          |          |          |          |  |
| 2 B                                                                                                                            | 1.774860                                                                                                                                                                                                                                                                                                                                                                                                                                                                                                                                                                                                                                                                                                                                                                                                                                                                                                                                                                                                                                                                                                                                                                                                                                                                                                                                                                                                                                                                                               | 0.000000 |          |          |          |   |   |      |          |  |  |  |  |      |          |          |  |  |  |      |          |          |          |  |  |      |          |          |          |          |  |      |          |          |          |          |          |     |          |          |          |          |          |     |          |          |          |          |          |      |          |          |          |          |          |      |          |          |          |          |          |  |   |   |   |   |  |     |          |          |  |  |  |      |          |          |          |  |  |      |          |          |          |          |  |     |          |          |          |          |  |
| 3 Se                                                                                                                           | 2.945744                                                                                                                                                                                                                                                                                                                                                                                                                                                                                                                                                                                                                                                                                                                                                                                                                                                                                                                                                                                                                                                                                                                                                                                                                                                                                                                                                                                                                                                                                               | 3.160158 | 0.000000 |          |          |   |   |      |          |  |  |  |  |      |          |          |  |  |  |      |          |          |          |  |  |      |          |          |          |          |  |      |          |          |          |          |          |     |          |          |          |          |          |     |          |          |          |          |          |      |          |          |          |          |          |      |          |          |          |          |          |  |   |   |   |   |  |     |          |          |  |  |  |      |          |          |          |  |  |      |          |          |          |          |  |     |          |          |          |          |  |
| 4 B                                                                                                                            | 2.870018                                                                                                                                                                                                                                                                                                                                                                                                                                                                                                                                                                                                                                                                                                                                                                                                                                                                                                                                                                                                                                                                                                                                                                                                                                                                                                                                                                                                                                                                                               | 1.833361 | 2.079919 | 0.000000 |          |   |   |      |          |  |  |  |  |      |          |          |  |  |  |      |          |          |          |  |  |      |          |          |          |          |  |      |          |          |          |          |          |     |          |          |          |          |          |     |          |          |          |          |          |      |          |          |          |          |          |      |          |          |          |          |          |  |   |   |   |   |  |     |          |          |  |  |  |      |          |          |          |  |  |      |          |          |          |          |  |     |          |          |          |          |  |
| 5 Se                                                                                                                           | 3.214196                                                                                                                                                                                                                                                                                                                                                                                                                                                                                                                                                                                                                                                                                                                                                                                                                                                                                                                                                                                                                                                                                                                                                                                                                                                                                                                                                                                                                                                                                               | 2.053149 | 3.372368 | 2.001632 | 0.000000 |   |   |      |          |  |  |  |  |      |          |          |  |  |  |      |          |          |          |  |  |      |          |          |          |          |  |      |          |          |          |          |          |     |          |          |          |          |          |     |          |          |          |          |          |      |          |          |          |          |          |      |          |          |          |          |          |  |   |   |   |   |  |     |          |          |  |  |  |      |          |          |          |  |  |      |          |          |          |          |  |     |          |          |          |          |  |
| 6 B                                                                                                                            | 1.803037                                                                                                                                                                                                                                                                                                                                                                                                                                                                                                                                                                                                                                                                                                                                                                                                                                                                                                                                                                                                                                                                                                                                                                                                                                                                                                                                                                                                                                                                                               | 1.760679 | 2.153578 | 1.808327 | 3.245121 |   |   |      |          |  |  |  |  |      |          |          |  |  |  |      |          |          |          |  |  |      |          |          |          |          |  |      |          |          |          |          |          |     |          |          |          |          |          |     |          |          |          |          |          |      |          |          |          |          |          |      |          |          |          |          |          |  |   |   |   |   |  |     |          |          |  |  |  |      |          |          |          |  |  |      |          |          |          |          |  |     |          |          |          |          |  |
| 7 B                                                                                                                            | 1.712140                                                                                                                                                                                                                                                                                                                                                                                                                                                                                                                                                                                                                                                                                                                                                                                                                                                                                                                                                                                                                                                                                                                                                                                                                                                                                                                                                                                                                                                                                               | 2.965138 | 2.059910 | 3.092543 | 4.109953 |   |   |      |          |  |  |  |  |      |          |          |  |  |  |      |          |          |          |  |  |      |          |          |          |          |  |      |          |          |          |          |          |     |          |          |          |          |          |     |          |          |          |          |          |      |          |          |          |          |          |      |          |          |          |          |          |  |   |   |   |   |  |     |          |          |  |  |  |      |          |          |          |  |  |      |          |          |          |          |  |     |          |          |          |          |  |
| 8 B                                                                                                                            | 1.734855                                                                                                                                                                                                                                                                                                                                                                                                                                                                                                                                                                                                                                                                                                                                                                                                                                                                                                                                                                                                                                                                                                                                                                                                                                                                                                                                                                                                                                                                                               | 1.872866 | 3.247367 | 2.805863 | 2.025184 |   |   |      |          |  |  |  |  |      |          |          |  |  |  |      |          |          |          |  |  |      |          |          |          |          |  |      |          |          |          |          |          |     |          |          |          |          |          |     |          |          |          |          |          |      |          |          |          |          |          |      |          |          |          |          |          |  |   |   |   |   |  |     |          |          |  |  |  |      |          |          |          |  |  |      |          |          |          |          |  |     |          |          |          |          |  |
| 9 Co                                                                                                                           | 2.094140                                                                                                                                                                                                                                                                                                                                                                                                                                                                                                                                                                                                                                                                                                                                                                                                                                                                                                                                                                                                                                                                                                                                                                                                                                                                                                                                                                                                                                                                                               | 3.211452 | 2.400384 | 3.378805 | 3.452256 |   |   |      |          |  |  |  |  |      |          |          |  |  |  |      |          |          |          |  |  |      |          |          |          |          |  |      |          |          |          |          |          |     |          |          |          |          |          |     |          |          |          |          |          |      |          |          |          |          |          |      |          |          |          |          |          |  |   |   |   |   |  |     |          |          |  |  |  |      |          |          |          |  |  |      |          |          |          |          |  |     |          |          |          |          |  |
|                                                                                                                                | 6                                                                                                                                                                                                                                                                                                                                                                                                                                                                                                                                                                                                                                                                                                                                                                                                                                                                                                                                                                                                                                                                                                                                                                                                                                                                                                                                                                                                                                                                                                      | 7        | 8        | 9        |          |   |   |      |          |  |  |  |  |      |          |          |  |  |  |      |          |          |          |  |  |      |          |          |          |          |  |      |          |          |          |          |          |     |          |          |          |          |          |     |          |          |          |          |          |      |          |          |          |          |          |      |          |          |          |          |          |  |   |   |   |   |  |     |          |          |  |  |  |      |          |          |          |  |  |      |          |          |          |          |  |     |          |          |          |          |  |
| 7 B                                                                                                                            | 1.789882                                                                                                                                                                                                                                                                                                                                                                                                                                                                                                                                                                                                                                                                                                                                                                                                                                                                                                                                                                                                                                                                                                                                                                                                                                                                                                                                                                                                                                                                                               | 0.000000 |          |          |          |   |   |      |          |  |  |  |  |      |          |          |  |  |  |      |          |          |          |  |  |      |          |          |          |          |  |      |          |          |          |          |          |     |          |          |          |          |          |     |          |          |          |          |          |      |          |          |          |          |          |      |          |          |          |          |          |  |   |   |   |   |  |     |          |          |  |  |  |      |          |          |          |  |  |      |          |          |          |          |  |     |          |          |          |          |  |
| 8 B                                                                                                                            | 2.855756                                                                                                                                                                                                                                                                                                                                                                                                                                                                                                                                                                                                                                                                                                                                                                                                                                                                                                                                                                                                                                                                                                                                                                                                                                                                                                                                                                                                                                                                                               | 2.967660 | 0.000000 |          |          |   |   |      |          |  |  |  |  |      |          |          |  |  |  |      |          |          |          |  |  |      |          |          |          |          |  |      |          |          |          |          |          |     |          |          |          |          |          |     |          |          |          |          |          |      |          |          |          |          |          |      |          |          |          |          |          |  |   |   |   |   |  |     |          |          |  |  |  |      |          |          |          |  |  |      |          |          |          |          |  |     |          |          |          |          |  |
| 9 Co                                                                                                                           | 2.998042                                                                                                                                                                                                                                                                                                                                                                                                                                                                                                                                                                                                                                                                                                                                                                                                                                                                                                                                                                                                                                                                                                                                                                                                                                                                                                                                                                                                                                                                                               | 1.955886 | 2.042292 | 0.000000 |          |   |   |      |          |  |  |  |  |      |          |          |  |  |  |      |          |          |          |  |  |      |          |          |          |          |  |      |          |          |          |          |          |     |          |          |          |          |          |     |          |          |          |          |          |      |          |          |          |          |          |      |          |          |          |          |          |  |   |   |   |   |  |     |          |          |  |  |  |      |          |          |          |  |  |      |          |          |          |          |  |     |          |          |          |          |  |
|  <p>3. -6531.8788120 +5.2 C<sub>1</sub></p> | <table border="1"> <thead> <tr> <th></th> <th>1</th> <th>2</th> <th>3</th> <th>4</th> <th>5</th> </tr> </thead> <tbody> <tr><td>1 B</td><td>0.000000</td><td></td><td></td><td></td><td></td></tr> <tr><td>2 B</td><td>2.856610</td><td>0.000000</td><td></td><td></td><td></td></tr> <tr><td>3 B</td><td>1.868277</td><td>2.749605</td><td>0.000000</td><td></td><td></td></tr> <tr><td>4 Se</td><td>2.171785</td><td>3.116207</td><td>2.127711</td><td>0.000000</td><td></td></tr> <tr><td>5 B</td><td>2.621080</td><td>1.775414</td><td>3.052981</td><td>2.113119</td><td>0.000000</td></tr> <tr><td>6 B</td><td>1.783433</td><td>2.944973</td><td>3.132023</td><td>2.033450</td><td>1.709467</td></tr> <tr><td>7 B</td><td>1.791222</td><td>1.779303</td><td>2.886905</td><td>2.888526</td><td>1.754775</td></tr> <tr><td>8 Co</td><td>2.071804</td><td>2.180539</td><td>2.067736</td><td>3.542924</td><td>3.251672</td></tr> <tr><td>9 Se</td><td>3.328864</td><td>1.995899</td><td>1.996367</td><td>3.292208</td><td>3.168174</td></tr> <tr> <td></td> <td>6</td> <td>7</td> <td>8</td> <td>9</td> <td></td> </tr> <tr><td>7 B</td><td>1.685280</td><td>0.000000</td><td></td><td></td><td></td></tr> <tr><td>8 Co</td><td>3.347063</td><td>2.106451</td><td>0.000000</td><td></td><td></td></tr> <tr><td>9 Se</td><td>4.119100</td><td>3.282372</td><td>2.320811</td><td>0.000000</td><td></td></tr> </tbody> </table>                                                                          |          | 1        | 2        | 3        | 4 | 5 | 1 B  | 0.000000 |  |  |  |  | 2 B  | 2.856610 | 0.000000 |  |  |  | 3 B  | 1.868277 | 2.749605 | 0.000000 |  |  | 4 Se | 2.171785 | 3.116207 | 2.127711 | 0.000000 |  | 5 B  | 2.621080 | 1.775414 | 3.052981 | 2.113119 | 0.000000 | 6 B | 1.783433 | 2.944973 | 3.132023 | 2.033450 | 1.709467 | 7 B | 1.791222 | 1.779303 | 2.886905 | 2.888526 | 1.754775 | 8 Co | 2.071804 | 2.180539 | 2.067736 | 3.542924 | 3.251672 | 9 Se | 3.328864 | 1.995899 | 1.996367 | 3.292208 | 3.168174 |  | 6 | 7 | 8 | 9 |  | 7 B | 1.685280 | 0.000000 |  |  |  | 8 Co | 3.347063 | 2.106451 | 0.000000 |  |  | 9 Se | 4.119100 | 3.282372 | 2.320811 | 0.000000 |  |     |          |          |          |          |  |
|                                                                                                                                | 1                                                                                                                                                                                                                                                                                                                                                                                                                                                                                                                                                                                                                                                                                                                                                                                                                                                                                                                                                                                                                                                                                                                                                                                                                                                                                                                                                                                                                                                                                                      | 2        | 3        | 4        | 5        |   |   |      |          |  |  |  |  |      |          |          |  |  |  |      |          |          |          |  |  |      |          |          |          |          |  |      |          |          |          |          |          |     |          |          |          |          |          |     |          |          |          |          |          |      |          |          |          |          |          |      |          |          |          |          |          |  |   |   |   |   |  |     |          |          |  |  |  |      |          |          |          |  |  |      |          |          |          |          |  |     |          |          |          |          |  |
| 1 B                                                                                                                            | 0.000000                                                                                                                                                                                                                                                                                                                                                                                                                                                                                                                                                                                                                                                                                                                                                                                                                                                                                                                                                                                                                                                                                                                                                                                                                                                                                                                                                                                                                                                                                               |          |          |          |          |   |   |      |          |  |  |  |  |      |          |          |  |  |  |      |          |          |          |  |  |      |          |          |          |          |  |      |          |          |          |          |          |     |          |          |          |          |          |     |          |          |          |          |          |      |          |          |          |          |          |      |          |          |          |          |          |  |   |   |   |   |  |     |          |          |  |  |  |      |          |          |          |  |  |      |          |          |          |          |  |     |          |          |          |          |  |
| 2 B                                                                                                                            | 2.856610                                                                                                                                                                                                                                                                                                                                                                                                                                                                                                                                                                                                                                                                                                                                                                                                                                                                                                                                                                                                                                                                                                                                                                                                                                                                                                                                                                                                                                                                                               | 0.000000 |          |          |          |   |   |      |          |  |  |  |  |      |          |          |  |  |  |      |          |          |          |  |  |      |          |          |          |          |  |      |          |          |          |          |          |     |          |          |          |          |          |     |          |          |          |          |          |      |          |          |          |          |          |      |          |          |          |          |          |  |   |   |   |   |  |     |          |          |  |  |  |      |          |          |          |  |  |      |          |          |          |          |  |     |          |          |          |          |  |
| 3 B                                                                                                                            | 1.868277                                                                                                                                                                                                                                                                                                                                                                                                                                                                                                                                                                                                                                                                                                                                                                                                                                                                                                                                                                                                                                                                                                                                                                                                                                                                                                                                                                                                                                                                                               | 2.749605 | 0.000000 |          |          |   |   |      |          |  |  |  |  |      |          |          |  |  |  |      |          |          |          |  |  |      |          |          |          |          |  |      |          |          |          |          |          |     |          |          |          |          |          |     |          |          |          |          |          |      |          |          |          |          |          |      |          |          |          |          |          |  |   |   |   |   |  |     |          |          |  |  |  |      |          |          |          |  |  |      |          |          |          |          |  |     |          |          |          |          |  |
| 4 Se                                                                                                                           | 2.171785                                                                                                                                                                                                                                                                                                                                                                                                                                                                                                                                                                                                                                                                                                                                                                                                                                                                                                                                                                                                                                                                                                                                                                                                                                                                                                                                                                                                                                                                                               | 3.116207 | 2.127711 | 0.000000 |          |   |   |      |          |  |  |  |  |      |          |          |  |  |  |      |          |          |          |  |  |      |          |          |          |          |  |      |          |          |          |          |          |     |          |          |          |          |          |     |          |          |          |          |          |      |          |          |          |          |          |      |          |          |          |          |          |  |   |   |   |   |  |     |          |          |  |  |  |      |          |          |          |  |  |      |          |          |          |          |  |     |          |          |          |          |  |
| 5 B                                                                                                                            | 2.621080                                                                                                                                                                                                                                                                                                                                                                                                                                                                                                                                                                                                                                                                                                                                                                                                                                                                                                                                                                                                                                                                                                                                                                                                                                                                                                                                                                                                                                                                                               | 1.775414 | 3.052981 | 2.113119 | 0.000000 |   |   |      |          |  |  |  |  |      |          |          |  |  |  |      |          |          |          |  |  |      |          |          |          |          |  |      |          |          |          |          |          |     |          |          |          |          |          |     |          |          |          |          |          |      |          |          |          |          |          |      |          |          |          |          |          |  |   |   |   |   |  |     |          |          |  |  |  |      |          |          |          |  |  |      |          |          |          |          |  |     |          |          |          |          |  |
| 6 B                                                                                                                            | 1.783433                                                                                                                                                                                                                                                                                                                                                                                                                                                                                                                                                                                                                                                                                                                                                                                                                                                                                                                                                                                                                                                                                                                                                                                                                                                                                                                                                                                                                                                                                               | 2.944973 | 3.132023 | 2.033450 | 1.709467 |   |   |      |          |  |  |  |  |      |          |          |  |  |  |      |          |          |          |  |  |      |          |          |          |          |  |      |          |          |          |          |          |     |          |          |          |          |          |     |          |          |          |          |          |      |          |          |          |          |          |      |          |          |          |          |          |  |   |   |   |   |  |     |          |          |  |  |  |      |          |          |          |  |  |      |          |          |          |          |  |     |          |          |          |          |  |
| 7 B                                                                                                                            | 1.791222                                                                                                                                                                                                                                                                                                                                                                                                                                                                                                                                                                                                                                                                                                                                                                                                                                                                                                                                                                                                                                                                                                                                                                                                                                                                                                                                                                                                                                                                                               | 1.779303 | 2.886905 | 2.888526 | 1.754775 |   |   |      |          |  |  |  |  |      |          |          |  |  |  |      |          |          |          |  |  |      |          |          |          |          |  |      |          |          |          |          |          |     |          |          |          |          |          |     |          |          |          |          |          |      |          |          |          |          |          |      |          |          |          |          |          |  |   |   |   |   |  |     |          |          |  |  |  |      |          |          |          |  |  |      |          |          |          |          |  |     |          |          |          |          |  |
| 8 Co                                                                                                                           | 2.071804                                                                                                                                                                                                                                                                                                                                                                                                                                                                                                                                                                                                                                                                                                                                                                                                                                                                                                                                                                                                                                                                                                                                                                                                                                                                                                                                                                                                                                                                                               | 2.180539 | 2.067736 | 3.542924 | 3.251672 |   |   |      |          |  |  |  |  |      |          |          |  |  |  |      |          |          |          |  |  |      |          |          |          |          |  |      |          |          |          |          |          |     |          |          |          |          |          |     |          |          |          |          |          |      |          |          |          |          |          |      |          |          |          |          |          |  |   |   |   |   |  |     |          |          |  |  |  |      |          |          |          |  |  |      |          |          |          |          |  |     |          |          |          |          |  |
| 9 Se                                                                                                                           | 3.328864                                                                                                                                                                                                                                                                                                                                                                                                                                                                                                                                                                                                                                                                                                                                                                                                                                                                                                                                                                                                                                                                                                                                                                                                                                                                                                                                                                                                                                                                                               | 1.995899 | 1.996367 | 3.292208 | 3.168174 |   |   |      |          |  |  |  |  |      |          |          |  |  |  |      |          |          |          |  |  |      |          |          |          |          |  |      |          |          |          |          |          |     |          |          |          |          |          |     |          |          |          |          |          |      |          |          |          |          |          |      |          |          |          |          |          |  |   |   |   |   |  |     |          |          |  |  |  |      |          |          |          |  |  |      |          |          |          |          |  |     |          |          |          |          |  |
|                                                                                                                                | 6                                                                                                                                                                                                                                                                                                                                                                                                                                                                                                                                                                                                                                                                                                                                                                                                                                                                                                                                                                                                                                                                                                                                                                                                                                                                                                                                                                                                                                                                                                      | 7        | 8        | 9        |          |   |   |      |          |  |  |  |  |      |          |          |  |  |  |      |          |          |          |  |  |      |          |          |          |          |  |      |          |          |          |          |          |     |          |          |          |          |          |     |          |          |          |          |          |      |          |          |          |          |          |      |          |          |          |          |          |  |   |   |   |   |  |     |          |          |  |  |  |      |          |          |          |  |  |      |          |          |          |          |  |     |          |          |          |          |  |
| 7 B                                                                                                                            | 1.685280                                                                                                                                                                                                                                                                                                                                                                                                                                                                                                                                                                                                                                                                                                                                                                                                                                                                                                                                                                                                                                                                                                                                                                                                                                                                                                                                                                                                                                                                                               | 0.000000 |          |          |          |   |   |      |          |  |  |  |  |      |          |          |  |  |  |      |          |          |          |  |  |      |          |          |          |          |  |      |          |          |          |          |          |     |          |          |          |          |          |     |          |          |          |          |          |      |          |          |          |          |          |      |          |          |          |          |          |  |   |   |   |   |  |     |          |          |  |  |  |      |          |          |          |  |  |      |          |          |          |          |  |     |          |          |          |          |  |
| 8 Co                                                                                                                           | 3.347063                                                                                                                                                                                                                                                                                                                                                                                                                                                                                                                                                                                                                                                                                                                                                                                                                                                                                                                                                                                                                                                                                                                                                                                                                                                                                                                                                                                                                                                                                               | 2.106451 | 0.000000 |          |          |   |   |      |          |  |  |  |  |      |          |          |  |  |  |      |          |          |          |  |  |      |          |          |          |          |  |      |          |          |          |          |          |     |          |          |          |          |          |     |          |          |          |          |          |      |          |          |          |          |          |      |          |          |          |          |          |  |   |   |   |   |  |     |          |          |  |  |  |      |          |          |          |  |  |      |          |          |          |          |  |     |          |          |          |          |  |
| 9 Se                                                                                                                           | 4.119100                                                                                                                                                                                                                                                                                                                                                                                                                                                                                                                                                                                                                                                                                                                                                                                                                                                                                                                                                                                                                                                                                                                                                                                                                                                                                                                                                                                                                                                                                               | 3.282372 | 2.320811 | 0.000000 |          |   |   |      |          |  |  |  |  |      |          |          |  |  |  |      |          |          |          |  |  |      |          |          |          |          |  |      |          |          |          |          |          |     |          |          |          |          |          |     |          |          |          |          |          |      |          |          |          |          |          |      |          |          |          |          |          |  |   |   |   |   |  |     |          |          |  |  |  |      |          |          |          |  |  |      |          |          |          |          |  |     |          |          |          |          |  |

| 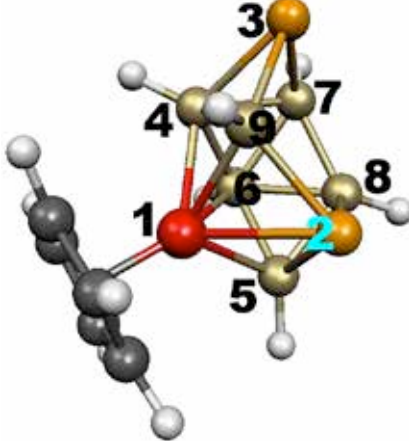 <p>4. -6531.8737792 +8.4 C<sub>1</sub></p>    | <table border="1"> <thead> <tr> <th></th> <th>1</th> <th>2</th> <th>3</th> <th>4</th> <th>5</th> </tr> </thead> <tbody> <tr><td>1 Co</td><td>0.000000</td><td></td><td></td><td></td><td></td></tr> <tr><td>2 Se</td><td>2.393080</td><td>0.000000</td><td></td><td></td><td></td></tr> <tr><td>3 Se</td><td>3.627193</td><td>3.345098</td><td>0.000000</td><td></td><td></td></tr> <tr><td>4 B</td><td>2.109945</td><td>3.171105</td><td>2.068857</td><td>0.000000</td><td></td></tr> <tr><td>5 B</td><td>2.041827</td><td>2.084126</td><td>4.141447</td><td>3.006831</td><td>0.000000</td></tr> <tr><td>6 B</td><td>2.118026</td><td>2.924434</td><td>3.232708</td><td>1.748662</td><td>1.712752</td></tr> <tr><td>7 B</td><td>3.265536</td><td>3.129441</td><td>2.016292</td><td>1.864053</td><td>2.918364</td></tr> <tr><td>8 B</td><td>3.009712</td><td>2.151117</td><td>3.175014</td><td>2.811720</td><td>1.712135</td></tr> <tr><td>9 B</td><td>2.082633</td><td>2.079259</td><td>1.994867</td><td>1.895590</td><td>3.161110</td></tr> <tr> <td></td> <td>6</td> <td>7</td> <td>8</td> <td>9</td> <td></td> </tr> <tr><td>6 B</td><td>0.000000</td><td></td><td></td><td></td><td></td></tr> <tr><td>7 B</td><td>1.758266</td><td>0.000000</td><td></td><td></td><td></td></tr> <tr><td>8 B</td><td>1.782263</td><td>1.719366</td><td>0.000000</td><td></td><td></td></tr> <tr><td>9 B</td><td>2.885616</td><td>2.771081</td><td>3.026693</td><td>0.000000</td><td></td></tr> </tbody> </table>  |          | 1        | 2        | 3        | 4 | 5 | 1 Co | 0.000000 |  |  |  |  | 2 Se | 2.393080 | 0.000000 |  |  |  | 3 Se | 3.627193 | 3.345098 | 0.000000 |  |  | 4 B  | 2.109945 | 3.171105 | 2.068857 | 0.000000 |  | 5 B | 2.041827 | 2.084126 | 4.141447 | 3.006831 | 0.000000 | 6 B  | 2.118026 | 2.924434 | 3.232708 | 1.748662 | 1.712752 | 7 B  | 3.265536 | 3.129441 | 2.016292 | 1.864053 | 2.918364 | 8 B | 3.009712 | 2.151117 | 3.175014 | 2.811720 | 1.712135 | 9 B | 2.082633 | 2.079259 | 1.994867 | 1.895590 | 3.161110 |  | 6 | 7 | 8 | 9 |  | 6 B  | 0.000000 |  |  |  |  | 7 B  | 1.758266 | 0.000000 |  |  |  | 8 B | 1.782263 | 1.719366 | 0.000000 |  |  | 9 B | 2.885616 | 2.771081 | 3.026693 | 0.000000 |  |
|---------------------------------------------------------------------------------------------------------------------------------|---------------------------------------------------------------------------------------------------------------------------------------------------------------------------------------------------------------------------------------------------------------------------------------------------------------------------------------------------------------------------------------------------------------------------------------------------------------------------------------------------------------------------------------------------------------------------------------------------------------------------------------------------------------------------------------------------------------------------------------------------------------------------------------------------------------------------------------------------------------------------------------------------------------------------------------------------------------------------------------------------------------------------------------------------------------------------------------------------------------------------------------------------------------------------------------------------------------------------------------------------------------------------------------------------------------------------------------------------------------------------------------------------------------------------------------------------------------------------------------------------------|----------|----------|----------|----------|---|---|------|----------|--|--|--|--|------|----------|----------|--|--|--|------|----------|----------|----------|--|--|------|----------|----------|----------|----------|--|-----|----------|----------|----------|----------|----------|------|----------|----------|----------|----------|----------|------|----------|----------|----------|----------|----------|-----|----------|----------|----------|----------|----------|-----|----------|----------|----------|----------|----------|--|---|---|---|---|--|------|----------|--|--|--|--|------|----------|----------|--|--|--|-----|----------|----------|----------|--|--|-----|----------|----------|----------|----------|--|
|                                                                                                                                 | 1                                                                                                                                                                                                                                                                                                                                                                                                                                                                                                                                                                                                                                                                                                                                                                                                                                                                                                                                                                                                                                                                                                                                                                                                                                                                                                                                                                                                                                                                                                       | 2        | 3        | 4        | 5        |   |   |      |          |  |  |  |  |      |          |          |  |  |  |      |          |          |          |  |  |      |          |          |          |          |  |     |          |          |          |          |          |      |          |          |          |          |          |      |          |          |          |          |          |     |          |          |          |          |          |     |          |          |          |          |          |  |   |   |   |   |  |      |          |  |  |  |  |      |          |          |  |  |  |     |          |          |          |  |  |     |          |          |          |          |  |
| 1 Co                                                                                                                            | 0.000000                                                                                                                                                                                                                                                                                                                                                                                                                                                                                                                                                                                                                                                                                                                                                                                                                                                                                                                                                                                                                                                                                                                                                                                                                                                                                                                                                                                                                                                                                                |          |          |          |          |   |   |      |          |  |  |  |  |      |          |          |  |  |  |      |          |          |          |  |  |      |          |          |          |          |  |     |          |          |          |          |          |      |          |          |          |          |          |      |          |          |          |          |          |     |          |          |          |          |          |     |          |          |          |          |          |  |   |   |   |   |  |      |          |  |  |  |  |      |          |          |  |  |  |     |          |          |          |  |  |     |          |          |          |          |  |
| 2 Se                                                                                                                            | 2.393080                                                                                                                                                                                                                                                                                                                                                                                                                                                                                                                                                                                                                                                                                                                                                                                                                                                                                                                                                                                                                                                                                                                                                                                                                                                                                                                                                                                                                                                                                                | 0.000000 |          |          |          |   |   |      |          |  |  |  |  |      |          |          |  |  |  |      |          |          |          |  |  |      |          |          |          |          |  |     |          |          |          |          |          |      |          |          |          |          |          |      |          |          |          |          |          |     |          |          |          |          |          |     |          |          |          |          |          |  |   |   |   |   |  |      |          |  |  |  |  |      |          |          |  |  |  |     |          |          |          |  |  |     |          |          |          |          |  |
| 3 Se                                                                                                                            | 3.627193                                                                                                                                                                                                                                                                                                                                                                                                                                                                                                                                                                                                                                                                                                                                                                                                                                                                                                                                                                                                                                                                                                                                                                                                                                                                                                                                                                                                                                                                                                | 3.345098 | 0.000000 |          |          |   |   |      |          |  |  |  |  |      |          |          |  |  |  |      |          |          |          |  |  |      |          |          |          |          |  |     |          |          |          |          |          |      |          |          |          |          |          |      |          |          |          |          |          |     |          |          |          |          |          |     |          |          |          |          |          |  |   |   |   |   |  |      |          |  |  |  |  |      |          |          |  |  |  |     |          |          |          |  |  |     |          |          |          |          |  |
| 4 B                                                                                                                             | 2.109945                                                                                                                                                                                                                                                                                                                                                                                                                                                                                                                                                                                                                                                                                                                                                                                                                                                                                                                                                                                                                                                                                                                                                                                                                                                                                                                                                                                                                                                                                                | 3.171105 | 2.068857 | 0.000000 |          |   |   |      |          |  |  |  |  |      |          |          |  |  |  |      |          |          |          |  |  |      |          |          |          |          |  |     |          |          |          |          |          |      |          |          |          |          |          |      |          |          |          |          |          |     |          |          |          |          |          |     |          |          |          |          |          |  |   |   |   |   |  |      |          |  |  |  |  |      |          |          |  |  |  |     |          |          |          |  |  |     |          |          |          |          |  |
| 5 B                                                                                                                             | 2.041827                                                                                                                                                                                                                                                                                                                                                                                                                                                                                                                                                                                                                                                                                                                                                                                                                                                                                                                                                                                                                                                                                                                                                                                                                                                                                                                                                                                                                                                                                                | 2.084126 | 4.141447 | 3.006831 | 0.000000 |   |   |      |          |  |  |  |  |      |          |          |  |  |  |      |          |          |          |  |  |      |          |          |          |          |  |     |          |          |          |          |          |      |          |          |          |          |          |      |          |          |          |          |          |     |          |          |          |          |          |     |          |          |          |          |          |  |   |   |   |   |  |      |          |  |  |  |  |      |          |          |  |  |  |     |          |          |          |  |  |     |          |          |          |          |  |
| 6 B                                                                                                                             | 2.118026                                                                                                                                                                                                                                                                                                                                                                                                                                                                                                                                                                                                                                                                                                                                                                                                                                                                                                                                                                                                                                                                                                                                                                                                                                                                                                                                                                                                                                                                                                | 2.924434 | 3.232708 | 1.748662 | 1.712752 |   |   |      |          |  |  |  |  |      |          |          |  |  |  |      |          |          |          |  |  |      |          |          |          |          |  |     |          |          |          |          |          |      |          |          |          |          |          |      |          |          |          |          |          |     |          |          |          |          |          |     |          |          |          |          |          |  |   |   |   |   |  |      |          |  |  |  |  |      |          |          |  |  |  |     |          |          |          |  |  |     |          |          |          |          |  |
| 7 B                                                                                                                             | 3.265536                                                                                                                                                                                                                                                                                                                                                                                                                                                                                                                                                                                                                                                                                                                                                                                                                                                                                                                                                                                                                                                                                                                                                                                                                                                                                                                                                                                                                                                                                                | 3.129441 | 2.016292 | 1.864053 | 2.918364 |   |   |      |          |  |  |  |  |      |          |          |  |  |  |      |          |          |          |  |  |      |          |          |          |          |  |     |          |          |          |          |          |      |          |          |          |          |          |      |          |          |          |          |          |     |          |          |          |          |          |     |          |          |          |          |          |  |   |   |   |   |  |      |          |  |  |  |  |      |          |          |  |  |  |     |          |          |          |  |  |     |          |          |          |          |  |
| 8 B                                                                                                                             | 3.009712                                                                                                                                                                                                                                                                                                                                                                                                                                                                                                                                                                                                                                                                                                                                                                                                                                                                                                                                                                                                                                                                                                                                                                                                                                                                                                                                                                                                                                                                                                | 2.151117 | 3.175014 | 2.811720 | 1.712135 |   |   |      |          |  |  |  |  |      |          |          |  |  |  |      |          |          |          |  |  |      |          |          |          |          |  |     |          |          |          |          |          |      |          |          |          |          |          |      |          |          |          |          |          |     |          |          |          |          |          |     |          |          |          |          |          |  |   |   |   |   |  |      |          |  |  |  |  |      |          |          |  |  |  |     |          |          |          |  |  |     |          |          |          |          |  |
| 9 B                                                                                                                             | 2.082633                                                                                                                                                                                                                                                                                                                                                                                                                                                                                                                                                                                                                                                                                                                                                                                                                                                                                                                                                                                                                                                                                                                                                                                                                                                                                                                                                                                                                                                                                                | 2.079259 | 1.994867 | 1.895590 | 3.161110 |   |   |      |          |  |  |  |  |      |          |          |  |  |  |      |          |          |          |  |  |      |          |          |          |          |  |     |          |          |          |          |          |      |          |          |          |          |          |      |          |          |          |          |          |     |          |          |          |          |          |     |          |          |          |          |          |  |   |   |   |   |  |      |          |  |  |  |  |      |          |          |  |  |  |     |          |          |          |  |  |     |          |          |          |          |  |
|                                                                                                                                 | 6                                                                                                                                                                                                                                                                                                                                                                                                                                                                                                                                                                                                                                                                                                                                                                                                                                                                                                                                                                                                                                                                                                                                                                                                                                                                                                                                                                                                                                                                                                       | 7        | 8        | 9        |          |   |   |      |          |  |  |  |  |      |          |          |  |  |  |      |          |          |          |  |  |      |          |          |          |          |  |     |          |          |          |          |          |      |          |          |          |          |          |      |          |          |          |          |          |     |          |          |          |          |          |     |          |          |          |          |          |  |   |   |   |   |  |      |          |  |  |  |  |      |          |          |  |  |  |     |          |          |          |  |  |     |          |          |          |          |  |
| 6 B                                                                                                                             | 0.000000                                                                                                                                                                                                                                                                                                                                                                                                                                                                                                                                                                                                                                                                                                                                                                                                                                                                                                                                                                                                                                                                                                                                                                                                                                                                                                                                                                                                                                                                                                |          |          |          |          |   |   |      |          |  |  |  |  |      |          |          |  |  |  |      |          |          |          |  |  |      |          |          |          |          |  |     |          |          |          |          |          |      |          |          |          |          |          |      |          |          |          |          |          |     |          |          |          |          |          |     |          |          |          |          |          |  |   |   |   |   |  |      |          |  |  |  |  |      |          |          |  |  |  |     |          |          |          |  |  |     |          |          |          |          |  |
| 7 B                                                                                                                             | 1.758266                                                                                                                                                                                                                                                                                                                                                                                                                                                                                                                                                                                                                                                                                                                                                                                                                                                                                                                                                                                                                                                                                                                                                                                                                                                                                                                                                                                                                                                                                                | 0.000000 |          |          |          |   |   |      |          |  |  |  |  |      |          |          |  |  |  |      |          |          |          |  |  |      |          |          |          |          |  |     |          |          |          |          |          |      |          |          |          |          |          |      |          |          |          |          |          |     |          |          |          |          |          |     |          |          |          |          |          |  |   |   |   |   |  |      |          |  |  |  |  |      |          |          |  |  |  |     |          |          |          |  |  |     |          |          |          |          |  |
| 8 B                                                                                                                             | 1.782263                                                                                                                                                                                                                                                                                                                                                                                                                                                                                                                                                                                                                                                                                                                                                                                                                                                                                                                                                                                                                                                                                                                                                                                                                                                                                                                                                                                                                                                                                                | 1.719366 | 0.000000 |          |          |   |   |      |          |  |  |  |  |      |          |          |  |  |  |      |          |          |          |  |  |      |          |          |          |          |  |     |          |          |          |          |          |      |          |          |          |          |          |      |          |          |          |          |          |     |          |          |          |          |          |     |          |          |          |          |          |  |   |   |   |   |  |      |          |  |  |  |  |      |          |          |  |  |  |     |          |          |          |  |  |     |          |          |          |          |  |
| 9 B                                                                                                                             | 2.885616                                                                                                                                                                                                                                                                                                                                                                                                                                                                                                                                                                                                                                                                                                                                                                                                                                                                                                                                                                                                                                                                                                                                                                                                                                                                                                                                                                                                                                                                                                | 2.771081 | 3.026693 | 0.000000 |          |   |   |      |          |  |  |  |  |      |          |          |  |  |  |      |          |          |          |  |  |      |          |          |          |          |  |     |          |          |          |          |          |      |          |          |          |          |          |      |          |          |          |          |          |     |          |          |          |          |          |     |          |          |          |          |          |  |   |   |   |   |  |      |          |  |  |  |  |      |          |          |  |  |  |     |          |          |          |  |  |     |          |          |          |          |  |
|  <p>5. -6531.8713578 +9.9 C<sub>2v</sub></p>  | <table border="1"> <thead> <tr> <th></th> <th>1</th> <th>2</th> <th>3</th> <th>4</th> <th>5</th> </tr> </thead> <tbody> <tr><td>1 B</td><td>0.000000</td><td></td><td></td><td></td><td></td></tr> <tr><td>2 B</td><td>1.968995</td><td>0.000000</td><td></td><td></td><td></td></tr> <tr><td>3 Se</td><td>2.174733</td><td>2.175280</td><td>0.000000</td><td></td><td></td></tr> <tr><td>4 Co</td><td>1.960170</td><td>1.960077</td><td>3.619387</td><td>0.000000</td><td></td></tr> <tr><td>5 B</td><td>2.637766</td><td>1.754580</td><td>3.196880</td><td>1.960545</td><td>0.000000</td></tr> <tr><td>6 B</td><td>1.754595</td><td>2.637738</td><td>3.196557</td><td>1.960548</td><td>1.970121</td></tr> <tr><td>7 Se</td><td>3.194685</td><td>3.194890</td><td>3.125643</td><td>3.618080</td><td>2.174199</td></tr> <tr><td>8 B</td><td>1.800738</td><td>2.916761</td><td>2.075394</td><td>3.269281</td><td>2.917688</td></tr> <tr><td>9 B</td><td>2.916242</td><td>1.800707</td><td>2.075496</td><td>3.269138</td><td>1.801546</td></tr> <tr> <td></td> <td>6</td> <td>7</td> <td>8</td> <td>9</td> <td></td> </tr> <tr><td>6 B</td><td>0.000000</td><td></td><td></td><td></td><td></td></tr> <tr><td>7 Se</td><td>2.173947</td><td>0.000000</td><td></td><td></td><td></td></tr> <tr><td>8 B</td><td>1.801464</td><td>2.075379</td><td>0.000000</td><td></td><td></td></tr> <tr><td>9 B</td><td>2.917313</td><td>2.075460</td><td>2.673130</td><td>0.000000</td><td></td></tr> </tbody> </table> |          | 1        | 2        | 3        | 4 | 5 | 1 B  | 0.000000 |  |  |  |  | 2 B  | 1.968995 | 0.000000 |  |  |  | 3 Se | 2.174733 | 2.175280 | 0.000000 |  |  | 4 Co | 1.960170 | 1.960077 | 3.619387 | 0.000000 |  | 5 B | 2.637766 | 1.754580 | 3.196880 | 1.960545 | 0.000000 | 6 B  | 1.754595 | 2.637738 | 3.196557 | 1.960548 | 1.970121 | 7 Se | 3.194685 | 3.194890 | 3.125643 | 3.618080 | 2.174199 | 8 B | 1.800738 | 2.916761 | 2.075394 | 3.269281 | 2.917688 | 9 B | 2.916242 | 1.800707 | 2.075496 | 3.269138 | 1.801546 |  | 6 | 7 | 8 | 9 |  | 6 B  | 0.000000 |  |  |  |  | 7 Se | 2.173947 | 0.000000 |  |  |  | 8 B | 1.801464 | 2.075379 | 0.000000 |  |  | 9 B | 2.917313 | 2.075460 | 2.673130 | 0.000000 |  |
|                                                                                                                                 | 1                                                                                                                                                                                                                                                                                                                                                                                                                                                                                                                                                                                                                                                                                                                                                                                                                                                                                                                                                                                                                                                                                                                                                                                                                                                                                                                                                                                                                                                                                                       | 2        | 3        | 4        | 5        |   |   |      |          |  |  |  |  |      |          |          |  |  |  |      |          |          |          |  |  |      |          |          |          |          |  |     |          |          |          |          |          |      |          |          |          |          |          |      |          |          |          |          |          |     |          |          |          |          |          |     |          |          |          |          |          |  |   |   |   |   |  |      |          |  |  |  |  |      |          |          |  |  |  |     |          |          |          |  |  |     |          |          |          |          |  |
| 1 B                                                                                                                             | 0.000000                                                                                                                                                                                                                                                                                                                                                                                                                                                                                                                                                                                                                                                                                                                                                                                                                                                                                                                                                                                                                                                                                                                                                                                                                                                                                                                                                                                                                                                                                                |          |          |          |          |   |   |      |          |  |  |  |  |      |          |          |  |  |  |      |          |          |          |  |  |      |          |          |          |          |  |     |          |          |          |          |          |      |          |          |          |          |          |      |          |          |          |          |          |     |          |          |          |          |          |     |          |          |          |          |          |  |   |   |   |   |  |      |          |  |  |  |  |      |          |          |  |  |  |     |          |          |          |  |  |     |          |          |          |          |  |
| 2 B                                                                                                                             | 1.968995                                                                                                                                                                                                                                                                                                                                                                                                                                                                                                                                                                                                                                                                                                                                                                                                                                                                                                                                                                                                                                                                                                                                                                                                                                                                                                                                                                                                                                                                                                | 0.000000 |          |          |          |   |   |      |          |  |  |  |  |      |          |          |  |  |  |      |          |          |          |  |  |      |          |          |          |          |  |     |          |          |          |          |          |      |          |          |          |          |          |      |          |          |          |          |          |     |          |          |          |          |          |     |          |          |          |          |          |  |   |   |   |   |  |      |          |  |  |  |  |      |          |          |  |  |  |     |          |          |          |  |  |     |          |          |          |          |  |
| 3 Se                                                                                                                            | 2.174733                                                                                                                                                                                                                                                                                                                                                                                                                                                                                                                                                                                                                                                                                                                                                                                                                                                                                                                                                                                                                                                                                                                                                                                                                                                                                                                                                                                                                                                                                                | 2.175280 | 0.000000 |          |          |   |   |      |          |  |  |  |  |      |          |          |  |  |  |      |          |          |          |  |  |      |          |          |          |          |  |     |          |          |          |          |          |      |          |          |          |          |          |      |          |          |          |          |          |     |          |          |          |          |          |     |          |          |          |          |          |  |   |   |   |   |  |      |          |  |  |  |  |      |          |          |  |  |  |     |          |          |          |  |  |     |          |          |          |          |  |
| 4 Co                                                                                                                            | 1.960170                                                                                                                                                                                                                                                                                                                                                                                                                                                                                                                                                                                                                                                                                                                                                                                                                                                                                                                                                                                                                                                                                                                                                                                                                                                                                                                                                                                                                                                                                                | 1.960077 | 3.619387 | 0.000000 |          |   |   |      |          |  |  |  |  |      |          |          |  |  |  |      |          |          |          |  |  |      |          |          |          |          |  |     |          |          |          |          |          |      |          |          |          |          |          |      |          |          |          |          |          |     |          |          |          |          |          |     |          |          |          |          |          |  |   |   |   |   |  |      |          |  |  |  |  |      |          |          |  |  |  |     |          |          |          |  |  |     |          |          |          |          |  |
| 5 B                                                                                                                             | 2.637766                                                                                                                                                                                                                                                                                                                                                                                                                                                                                                                                                                                                                                                                                                                                                                                                                                                                                                                                                                                                                                                                                                                                                                                                                                                                                                                                                                                                                                                                                                | 1.754580 | 3.196880 | 1.960545 | 0.000000 |   |   |      |          |  |  |  |  |      |          |          |  |  |  |      |          |          |          |  |  |      |          |          |          |          |  |     |          |          |          |          |          |      |          |          |          |          |          |      |          |          |          |          |          |     |          |          |          |          |          |     |          |          |          |          |          |  |   |   |   |   |  |      |          |  |  |  |  |      |          |          |  |  |  |     |          |          |          |  |  |     |          |          |          |          |  |
| 6 B                                                                                                                             | 1.754595                                                                                                                                                                                                                                                                                                                                                                                                                                                                                                                                                                                                                                                                                                                                                                                                                                                                                                                                                                                                                                                                                                                                                                                                                                                                                                                                                                                                                                                                                                | 2.637738 | 3.196557 | 1.960548 | 1.970121 |   |   |      |          |  |  |  |  |      |          |          |  |  |  |      |          |          |          |  |  |      |          |          |          |          |  |     |          |          |          |          |          |      |          |          |          |          |          |      |          |          |          |          |          |     |          |          |          |          |          |     |          |          |          |          |          |  |   |   |   |   |  |      |          |  |  |  |  |      |          |          |  |  |  |     |          |          |          |  |  |     |          |          |          |          |  |
| 7 Se                                                                                                                            | 3.194685                                                                                                                                                                                                                                                                                                                                                                                                                                                                                                                                                                                                                                                                                                                                                                                                                                                                                                                                                                                                                                                                                                                                                                                                                                                                                                                                                                                                                                                                                                | 3.194890 | 3.125643 | 3.618080 | 2.174199 |   |   |      |          |  |  |  |  |      |          |          |  |  |  |      |          |          |          |  |  |      |          |          |          |          |  |     |          |          |          |          |          |      |          |          |          |          |          |      |          |          |          |          |          |     |          |          |          |          |          |     |          |          |          |          |          |  |   |   |   |   |  |      |          |  |  |  |  |      |          |          |  |  |  |     |          |          |          |  |  |     |          |          |          |          |  |
| 8 B                                                                                                                             | 1.800738                                                                                                                                                                                                                                                                                                                                                                                                                                                                                                                                                                                                                                                                                                                                                                                                                                                                                                                                                                                                                                                                                                                                                                                                                                                                                                                                                                                                                                                                                                | 2.916761 | 2.075394 | 3.269281 | 2.917688 |   |   |      |          |  |  |  |  |      |          |          |  |  |  |      |          |          |          |  |  |      |          |          |          |          |  |     |          |          |          |          |          |      |          |          |          |          |          |      |          |          |          |          |          |     |          |          |          |          |          |     |          |          |          |          |          |  |   |   |   |   |  |      |          |  |  |  |  |      |          |          |  |  |  |     |          |          |          |  |  |     |          |          |          |          |  |
| 9 B                                                                                                                             | 2.916242                                                                                                                                                                                                                                                                                                                                                                                                                                                                                                                                                                                                                                                                                                                                                                                                                                                                                                                                                                                                                                                                                                                                                                                                                                                                                                                                                                                                                                                                                                | 1.800707 | 2.075496 | 3.269138 | 1.801546 |   |   |      |          |  |  |  |  |      |          |          |  |  |  |      |          |          |          |  |  |      |          |          |          |          |  |     |          |          |          |          |          |      |          |          |          |          |          |      |          |          |          |          |          |     |          |          |          |          |          |     |          |          |          |          |          |  |   |   |   |   |  |      |          |  |  |  |  |      |          |          |  |  |  |     |          |          |          |  |  |     |          |          |          |          |  |
|                                                                                                                                 | 6                                                                                                                                                                                                                                                                                                                                                                                                                                                                                                                                                                                                                                                                                                                                                                                                                                                                                                                                                                                                                                                                                                                                                                                                                                                                                                                                                                                                                                                                                                       | 7        | 8        | 9        |          |   |   |      |          |  |  |  |  |      |          |          |  |  |  |      |          |          |          |  |  |      |          |          |          |          |  |     |          |          |          |          |          |      |          |          |          |          |          |      |          |          |          |          |          |     |          |          |          |          |          |     |          |          |          |          |          |  |   |   |   |   |  |      |          |  |  |  |  |      |          |          |  |  |  |     |          |          |          |  |  |     |          |          |          |          |  |
| 6 B                                                                                                                             | 0.000000                                                                                                                                                                                                                                                                                                                                                                                                                                                                                                                                                                                                                                                                                                                                                                                                                                                                                                                                                                                                                                                                                                                                                                                                                                                                                                                                                                                                                                                                                                |          |          |          |          |   |   |      |          |  |  |  |  |      |          |          |  |  |  |      |          |          |          |  |  |      |          |          |          |          |  |     |          |          |          |          |          |      |          |          |          |          |          |      |          |          |          |          |          |     |          |          |          |          |          |     |          |          |          |          |          |  |   |   |   |   |  |      |          |  |  |  |  |      |          |          |  |  |  |     |          |          |          |  |  |     |          |          |          |          |  |
| 7 Se                                                                                                                            | 2.173947                                                                                                                                                                                                                                                                                                                                                                                                                                                                                                                                                                                                                                                                                                                                                                                                                                                                                                                                                                                                                                                                                                                                                                                                                                                                                                                                                                                                                                                                                                | 0.000000 |          |          |          |   |   |      |          |  |  |  |  |      |          |          |  |  |  |      |          |          |          |  |  |      |          |          |          |          |  |     |          |          |          |          |          |      |          |          |          |          |          |      |          |          |          |          |          |     |          |          |          |          |          |     |          |          |          |          |          |  |   |   |   |   |  |      |          |  |  |  |  |      |          |          |  |  |  |     |          |          |          |  |  |     |          |          |          |          |  |
| 8 B                                                                                                                             | 1.801464                                                                                                                                                                                                                                                                                                                                                                                                                                                                                                                                                                                                                                                                                                                                                                                                                                                                                                                                                                                                                                                                                                                                                                                                                                                                                                                                                                                                                                                                                                | 2.075379 | 0.000000 |          |          |   |   |      |          |  |  |  |  |      |          |          |  |  |  |      |          |          |          |  |  |      |          |          |          |          |  |     |          |          |          |          |          |      |          |          |          |          |          |      |          |          |          |          |          |     |          |          |          |          |          |     |          |          |          |          |          |  |   |   |   |   |  |      |          |  |  |  |  |      |          |          |  |  |  |     |          |          |          |  |  |     |          |          |          |          |  |
| 9 B                                                                                                                             | 2.917313                                                                                                                                                                                                                                                                                                                                                                                                                                                                                                                                                                                                                                                                                                                                                                                                                                                                                                                                                                                                                                                                                                                                                                                                                                                                                                                                                                                                                                                                                                | 2.075460 | 2.673130 | 0.000000 |          |   |   |      |          |  |  |  |  |      |          |          |  |  |  |      |          |          |          |  |  |      |          |          |          |          |  |     |          |          |          |          |          |      |          |          |          |          |          |      |          |          |          |          |          |     |          |          |          |          |          |     |          |          |          |          |          |  |   |   |   |   |  |      |          |  |  |  |  |      |          |          |  |  |  |     |          |          |          |  |  |     |          |          |          |          |  |
|  <p>6. -6531.8700036 +10.7 C<sub>1</sub></p> | <table border="1"> <thead> <tr> <th></th> <th>1</th> <th>2</th> <th>3</th> <th>4</th> <th>5</th> </tr> </thead> <tbody> <tr><td>1 B</td><td>0.000000</td><td></td><td></td><td></td><td></td></tr> <tr><td>2 B</td><td>1.764564</td><td>0.000000</td><td></td><td></td><td></td></tr> <tr><td>3 Co</td><td>3.289768</td><td>3.217944</td><td>0.000000</td><td></td><td></td></tr> <tr><td>4 Se</td><td>2.883626</td><td>3.104472</td><td>2.383941</td><td>0.000000</td><td></td></tr> <tr><td>5 B</td><td>1.771897</td><td>1.743226</td><td>3.488901</td><td>2.097647</td><td>0.000000</td></tr> <tr><td>6 Se</td><td>3.212005</td><td>1.982447</td><td>2.317886</td><td>3.434660</td><td>3.225895</td></tr> <tr><td>7 B</td><td>1.796237</td><td>1.934941</td><td>2.139169</td><td>3.147995</td><td>2.859874</td></tr> <tr><td>8 B</td><td>1.678392</td><td>2.914002</td><td>3.495577</td><td>2.045861</td><td>1.704862</td></tr> <tr><td>9 B</td><td>1.794611</td><td>2.874217</td><td>2.121576</td><td>2.160560</td><td>2.624480</td></tr> <tr> <td></td> <td>6</td> <td>7</td> <td>8</td> <td>9</td> <td></td> </tr> <tr><td>6 Se</td><td>0.000000</td><td></td><td></td><td></td><td></td></tr> <tr><td>7 B</td><td>2.037144</td><td>0.000000</td><td></td><td></td><td></td></tr> <tr><td>8 B</td><td>4.152975</td><td>2.983147</td><td>0.000000</td><td></td><td></td></tr> <tr><td>9 B</td><td>3.327351</td><td>1.802487</td><td>1.788605</td><td>0.000000</td><td></td></tr> </tbody> </table> |          | 1        | 2        | 3        | 4 | 5 | 1 B  | 0.000000 |  |  |  |  | 2 B  | 1.764564 | 0.000000 |  |  |  | 3 Co | 3.289768 | 3.217944 | 0.000000 |  |  | 4 Se | 2.883626 | 3.104472 | 2.383941 | 0.000000 |  | 5 B | 1.771897 | 1.743226 | 3.488901 | 2.097647 | 0.000000 | 6 Se | 3.212005 | 1.982447 | 2.317886 | 3.434660 | 3.225895 | 7 B  | 1.796237 | 1.934941 | 2.139169 | 3.147995 | 2.859874 | 8 B | 1.678392 | 2.914002 | 3.495577 | 2.045861 | 1.704862 | 9 B | 1.794611 | 2.874217 | 2.121576 | 2.160560 | 2.624480 |  | 6 | 7 | 8 | 9 |  | 6 Se | 0.000000 |  |  |  |  | 7 B  | 2.037144 | 0.000000 |  |  |  | 8 B | 4.152975 | 2.983147 | 0.000000 |  |  | 9 B | 3.327351 | 1.802487 | 1.788605 | 0.000000 |  |
|                                                                                                                                 | 1                                                                                                                                                                                                                                                                                                                                                                                                                                                                                                                                                                                                                                                                                                                                                                                                                                                                                                                                                                                                                                                                                                                                                                                                                                                                                                                                                                                                                                                                                                       | 2        | 3        | 4        | 5        |   |   |      |          |  |  |  |  |      |          |          |  |  |  |      |          |          |          |  |  |      |          |          |          |          |  |     |          |          |          |          |          |      |          |          |          |          |          |      |          |          |          |          |          |     |          |          |          |          |          |     |          |          |          |          |          |  |   |   |   |   |  |      |          |  |  |  |  |      |          |          |  |  |  |     |          |          |          |  |  |     |          |          |          |          |  |
| 1 B                                                                                                                             | 0.000000                                                                                                                                                                                                                                                                                                                                                                                                                                                                                                                                                                                                                                                                                                                                                                                                                                                                                                                                                                                                                                                                                                                                                                                                                                                                                                                                                                                                                                                                                                |          |          |          |          |   |   |      |          |  |  |  |  |      |          |          |  |  |  |      |          |          |          |  |  |      |          |          |          |          |  |     |          |          |          |          |          |      |          |          |          |          |          |      |          |          |          |          |          |     |          |          |          |          |          |     |          |          |          |          |          |  |   |   |   |   |  |      |          |  |  |  |  |      |          |          |  |  |  |     |          |          |          |  |  |     |          |          |          |          |  |
| 2 B                                                                                                                             | 1.764564                                                                                                                                                                                                                                                                                                                                                                                                                                                                                                                                                                                                                                                                                                                                                                                                                                                                                                                                                                                                                                                                                                                                                                                                                                                                                                                                                                                                                                                                                                | 0.000000 |          |          |          |   |   |      |          |  |  |  |  |      |          |          |  |  |  |      |          |          |          |  |  |      |          |          |          |          |  |     |          |          |          |          |          |      |          |          |          |          |          |      |          |          |          |          |          |     |          |          |          |          |          |     |          |          |          |          |          |  |   |   |   |   |  |      |          |  |  |  |  |      |          |          |  |  |  |     |          |          |          |  |  |     |          |          |          |          |  |
| 3 Co                                                                                                                            | 3.289768                                                                                                                                                                                                                                                                                                                                                                                                                                                                                                                                                                                                                                                                                                                                                                                                                                                                                                                                                                                                                                                                                                                                                                                                                                                                                                                                                                                                                                                                                                | 3.217944 | 0.000000 |          |          |   |   |      |          |  |  |  |  |      |          |          |  |  |  |      |          |          |          |  |  |      |          |          |          |          |  |     |          |          |          |          |          |      |          |          |          |          |          |      |          |          |          |          |          |     |          |          |          |          |          |     |          |          |          |          |          |  |   |   |   |   |  |      |          |  |  |  |  |      |          |          |  |  |  |     |          |          |          |  |  |     |          |          |          |          |  |
| 4 Se                                                                                                                            | 2.883626                                                                                                                                                                                                                                                                                                                                                                                                                                                                                                                                                                                                                                                                                                                                                                                                                                                                                                                                                                                                                                                                                                                                                                                                                                                                                                                                                                                                                                                                                                | 3.104472 | 2.383941 | 0.000000 |          |   |   |      |          |  |  |  |  |      |          |          |  |  |  |      |          |          |          |  |  |      |          |          |          |          |  |     |          |          |          |          |          |      |          |          |          |          |          |      |          |          |          |          |          |     |          |          |          |          |          |     |          |          |          |          |          |  |   |   |   |   |  |      |          |  |  |  |  |      |          |          |  |  |  |     |          |          |          |  |  |     |          |          |          |          |  |
| 5 B                                                                                                                             | 1.771897                                                                                                                                                                                                                                                                                                                                                                                                                                                                                                                                                                                                                                                                                                                                                                                                                                                                                                                                                                                                                                                                                                                                                                                                                                                                                                                                                                                                                                                                                                | 1.743226 | 3.488901 | 2.097647 | 0.000000 |   |   |      |          |  |  |  |  |      |          |          |  |  |  |      |          |          |          |  |  |      |          |          |          |          |  |     |          |          |          |          |          |      |          |          |          |          |          |      |          |          |          |          |          |     |          |          |          |          |          |     |          |          |          |          |          |  |   |   |   |   |  |      |          |  |  |  |  |      |          |          |  |  |  |     |          |          |          |  |  |     |          |          |          |          |  |
| 6 Se                                                                                                                            | 3.212005                                                                                                                                                                                                                                                                                                                                                                                                                                                                                                                                                                                                                                                                                                                                                                                                                                                                                                                                                                                                                                                                                                                                                                                                                                                                                                                                                                                                                                                                                                | 1.982447 | 2.317886 | 3.434660 | 3.225895 |   |   |      |          |  |  |  |  |      |          |          |  |  |  |      |          |          |          |  |  |      |          |          |          |          |  |     |          |          |          |          |          |      |          |          |          |          |          |      |          |          |          |          |          |     |          |          |          |          |          |     |          |          |          |          |          |  |   |   |   |   |  |      |          |  |  |  |  |      |          |          |  |  |  |     |          |          |          |  |  |     |          |          |          |          |  |
| 7 B                                                                                                                             | 1.796237                                                                                                                                                                                                                                                                                                                                                                                                                                                                                                                                                                                                                                                                                                                                                                                                                                                                                                                                                                                                                                                                                                                                                                                                                                                                                                                                                                                                                                                                                                | 1.934941 | 2.139169 | 3.147995 | 2.859874 |   |   |      |          |  |  |  |  |      |          |          |  |  |  |      |          |          |          |  |  |      |          |          |          |          |  |     |          |          |          |          |          |      |          |          |          |          |          |      |          |          |          |          |          |     |          |          |          |          |          |     |          |          |          |          |          |  |   |   |   |   |  |      |          |  |  |  |  |      |          |          |  |  |  |     |          |          |          |  |  |     |          |          |          |          |  |
| 8 B                                                                                                                             | 1.678392                                                                                                                                                                                                                                                                                                                                                                                                                                                                                                                                                                                                                                                                                                                                                                                                                                                                                                                                                                                                                                                                                                                                                                                                                                                                                                                                                                                                                                                                                                | 2.914002 | 3.495577 | 2.045861 | 1.704862 |   |   |      |          |  |  |  |  |      |          |          |  |  |  |      |          |          |          |  |  |      |          |          |          |          |  |     |          |          |          |          |          |      |          |          |          |          |          |      |          |          |          |          |          |     |          |          |          |          |          |     |          |          |          |          |          |  |   |   |   |   |  |      |          |  |  |  |  |      |          |          |  |  |  |     |          |          |          |  |  |     |          |          |          |          |  |
| 9 B                                                                                                                             | 1.794611                                                                                                                                                                                                                                                                                                                                                                                                                                                                                                                                                                                                                                                                                                                                                                                                                                                                                                                                                                                                                                                                                                                                                                                                                                                                                                                                                                                                                                                                                                | 2.874217 | 2.121576 | 2.160560 | 2.624480 |   |   |      |          |  |  |  |  |      |          |          |  |  |  |      |          |          |          |  |  |      |          |          |          |          |  |     |          |          |          |          |          |      |          |          |          |          |          |      |          |          |          |          |          |     |          |          |          |          |          |     |          |          |          |          |          |  |   |   |   |   |  |      |          |  |  |  |  |      |          |          |  |  |  |     |          |          |          |  |  |     |          |          |          |          |  |
|                                                                                                                                 | 6                                                                                                                                                                                                                                                                                                                                                                                                                                                                                                                                                                                                                                                                                                                                                                                                                                                                                                                                                                                                                                                                                                                                                                                                                                                                                                                                                                                                                                                                                                       | 7        | 8        | 9        |          |   |   |      |          |  |  |  |  |      |          |          |  |  |  |      |          |          |          |  |  |      |          |          |          |          |  |     |          |          |          |          |          |      |          |          |          |          |          |      |          |          |          |          |          |     |          |          |          |          |          |     |          |          |          |          |          |  |   |   |   |   |  |      |          |  |  |  |  |      |          |          |  |  |  |     |          |          |          |  |  |     |          |          |          |          |  |
| 6 Se                                                                                                                            | 0.000000                                                                                                                                                                                                                                                                                                                                                                                                                                                                                                                                                                                                                                                                                                                                                                                                                                                                                                                                                                                                                                                                                                                                                                                                                                                                                                                                                                                                                                                                                                |          |          |          |          |   |   |      |          |  |  |  |  |      |          |          |  |  |  |      |          |          |          |  |  |      |          |          |          |          |  |     |          |          |          |          |          |      |          |          |          |          |          |      |          |          |          |          |          |     |          |          |          |          |          |     |          |          |          |          |          |  |   |   |   |   |  |      |          |  |  |  |  |      |          |          |  |  |  |     |          |          |          |  |  |     |          |          |          |          |  |
| 7 B                                                                                                                             | 2.037144                                                                                                                                                                                                                                                                                                                                                                                                                                                                                                                                                                                                                                                                                                                                                                                                                                                                                                                                                                                                                                                                                                                                                                                                                                                                                                                                                                                                                                                                                                | 0.000000 |          |          |          |   |   |      |          |  |  |  |  |      |          |          |  |  |  |      |          |          |          |  |  |      |          |          |          |          |  |     |          |          |          |          |          |      |          |          |          |          |          |      |          |          |          |          |          |     |          |          |          |          |          |     |          |          |          |          |          |  |   |   |   |   |  |      |          |  |  |  |  |      |          |          |  |  |  |     |          |          |          |  |  |     |          |          |          |          |  |
| 8 B                                                                                                                             | 4.152975                                                                                                                                                                                                                                                                                                                                                                                                                                                                                                                                                                                                                                                                                                                                                                                                                                                                                                                                                                                                                                                                                                                                                                                                                                                                                                                                                                                                                                                                                                | 2.983147 | 0.000000 |          |          |   |   |      |          |  |  |  |  |      |          |          |  |  |  |      |          |          |          |  |  |      |          |          |          |          |  |     |          |          |          |          |          |      |          |          |          |          |          |      |          |          |          |          |          |     |          |          |          |          |          |     |          |          |          |          |          |  |   |   |   |   |  |      |          |  |  |  |  |      |          |          |  |  |  |     |          |          |          |  |  |     |          |          |          |          |  |
| 9 B                                                                                                                             | 3.327351                                                                                                                                                                                                                                                                                                                                                                                                                                                                                                                                                                                                                                                                                                                                                                                                                                                                                                                                                                                                                                                                                                                                                                                                                                                                                                                                                                                                                                                                                                | 1.802487 | 1.788605 | 0.000000 |          |   |   |      |          |  |  |  |  |      |          |          |  |  |  |      |          |          |          |  |  |      |          |          |          |          |  |     |          |          |          |          |          |      |          |          |          |          |          |      |          |          |          |          |          |     |          |          |          |          |          |     |          |          |          |          |          |  |   |   |   |   |  |      |          |  |  |  |  |      |          |          |  |  |  |     |          |          |          |  |  |     |          |          |          |          |  |



| 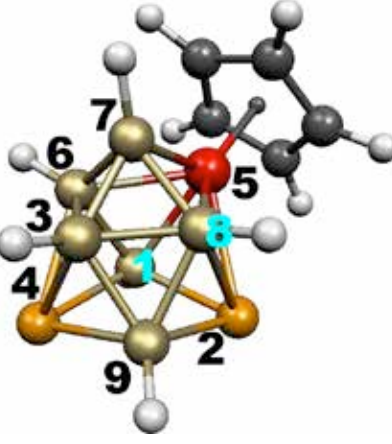 <p>7. -6531.8692067 +11.2 C<sub>1</sub></p>   | <table border="1"> <thead> <tr> <th></th> <th>1</th> <th>2</th> <th>3</th> <th>4</th> <th>5</th> </tr> </thead> <tbody> <tr><td>1 B</td><td>0.000000</td><td></td><td></td><td></td><td></td></tr> <tr><td>2 Se</td><td>2.056907</td><td>0.000000</td><td></td><td></td><td></td></tr> <tr><td>3 B</td><td>2.942808</td><td>3.202678</td><td>0.000000</td><td></td><td></td></tr> <tr><td>4 Se</td><td>2.087473</td><td>3.090254</td><td>2.167243</td><td>0.000000</td><td></td></tr> <tr><td>5 Co</td><td>2.064737</td><td>2.372019</td><td>3.026350</td><td>3.581351</td><td>0.000000</td></tr> <tr><td>6 B</td><td>1.846274</td><td>3.205896</td><td>1.933472</td><td>2.151167</td><td>2.103974</td></tr> <tr><td>7 B</td><td>3.003624</td><td>3.374086</td><td>1.676409</td><td>3.281730</td><td>2.018847</td></tr> <tr><td>8 B</td><td>2.969020</td><td>2.277280</td><td>1.728320</td><td>3.207773</td><td>2.240765</td></tr> <tr><td>9 B</td><td>2.692335</td><td>2.049778</td><td>1.787362</td><td>2.096576</td><td>3.257063</td></tr> <tr> <th></th> <th>6</th> <th>7</th> <th>8</th> <th>9</th> <th></th> </tr> <tr><td>6 B</td><td>0.000000</td><td></td><td></td><td></td><td></td></tr> <tr><td>7 B</td><td>1.699838</td><td>0.000000</td><td></td><td></td><td></td></tr> <tr><td>8 B</td><td>2.608711</td><td>1.681288</td><td>0.000000</td><td></td><td></td></tr> <tr><td>9 B</td><td>2.889952</td><td>2.921172</td><td>1.805252</td><td>0.000000</td><td></td></tr> </tbody> </table>   |          | 1        | 2        | 3        | 4 | 5 | 1 B  | 0.000000 |  |  |  |  | 2 Se | 2.056907 | 0.000000 |  |  |  | 3 B | 2.942808 | 3.202678 | 0.000000 |  |  | 4 Se | 2.087473 | 3.090254 | 2.167243 | 0.000000 |  | 5 Co | 2.064737 | 2.372019 | 3.026350 | 3.581351 | 0.000000 | 6 B | 1.846274 | 3.205896 | 1.933472 | 2.151167 | 2.103974 | 7 B  | 3.003624 | 3.374086 | 1.676409 | 3.281730 | 2.018847 | 8 B  | 2.969020 | 2.277280 | 1.728320 | 3.207773 | 2.240765 | 9 B | 2.692335 | 2.049778 | 1.787362 | 2.096576 | 3.257063 |  | 6 | 7 | 8 | 9 |  | 6 B | 0.000000 |  |  |  |  | 7 B  | 1.699838 | 0.000000 |  |  |  | 8 B  | 2.608711 | 1.681288 | 0.000000 |  |  | 9 B | 2.889952 | 2.921172 | 1.805252 | 0.000000 |  |
|---------------------------------------------------------------------------------------------------------------------------------|----------------------------------------------------------------------------------------------------------------------------------------------------------------------------------------------------------------------------------------------------------------------------------------------------------------------------------------------------------------------------------------------------------------------------------------------------------------------------------------------------------------------------------------------------------------------------------------------------------------------------------------------------------------------------------------------------------------------------------------------------------------------------------------------------------------------------------------------------------------------------------------------------------------------------------------------------------------------------------------------------------------------------------------------------------------------------------------------------------------------------------------------------------------------------------------------------------------------------------------------------------------------------------------------------------------------------------------------------------------------------------------------------------------------------------------------------------------------------------------------------------|----------|----------|----------|----------|---|---|------|----------|--|--|--|--|------|----------|----------|--|--|--|-----|----------|----------|----------|--|--|------|----------|----------|----------|----------|--|------|----------|----------|----------|----------|----------|-----|----------|----------|----------|----------|----------|------|----------|----------|----------|----------|----------|------|----------|----------|----------|----------|----------|-----|----------|----------|----------|----------|----------|--|---|---|---|---|--|-----|----------|--|--|--|--|------|----------|----------|--|--|--|------|----------|----------|----------|--|--|-----|----------|----------|----------|----------|--|
|                                                                                                                                 | 1                                                                                                                                                                                                                                                                                                                                                                                                                                                                                                                                                                                                                                                                                                                                                                                                                                                                                                                                                                                                                                                                                                                                                                                                                                                                                                                                                                                                                                                                                                        | 2        | 3        | 4        | 5        |   |   |      |          |  |  |  |  |      |          |          |  |  |  |     |          |          |          |  |  |      |          |          |          |          |  |      |          |          |          |          |          |     |          |          |          |          |          |      |          |          |          |          |          |      |          |          |          |          |          |     |          |          |          |          |          |  |   |   |   |   |  |     |          |  |  |  |  |      |          |          |  |  |  |      |          |          |          |  |  |     |          |          |          |          |  |
| 1 B                                                                                                                             | 0.000000                                                                                                                                                                                                                                                                                                                                                                                                                                                                                                                                                                                                                                                                                                                                                                                                                                                                                                                                                                                                                                                                                                                                                                                                                                                                                                                                                                                                                                                                                                 |          |          |          |          |   |   |      |          |  |  |  |  |      |          |          |  |  |  |     |          |          |          |  |  |      |          |          |          |          |  |      |          |          |          |          |          |     |          |          |          |          |          |      |          |          |          |          |          |      |          |          |          |          |          |     |          |          |          |          |          |  |   |   |   |   |  |     |          |  |  |  |  |      |          |          |  |  |  |      |          |          |          |  |  |     |          |          |          |          |  |
| 2 Se                                                                                                                            | 2.056907                                                                                                                                                                                                                                                                                                                                                                                                                                                                                                                                                                                                                                                                                                                                                                                                                                                                                                                                                                                                                                                                                                                                                                                                                                                                                                                                                                                                                                                                                                 | 0.000000 |          |          |          |   |   |      |          |  |  |  |  |      |          |          |  |  |  |     |          |          |          |  |  |      |          |          |          |          |  |      |          |          |          |          |          |     |          |          |          |          |          |      |          |          |          |          |          |      |          |          |          |          |          |     |          |          |          |          |          |  |   |   |   |   |  |     |          |  |  |  |  |      |          |          |  |  |  |      |          |          |          |  |  |     |          |          |          |          |  |
| 3 B                                                                                                                             | 2.942808                                                                                                                                                                                                                                                                                                                                                                                                                                                                                                                                                                                                                                                                                                                                                                                                                                                                                                                                                                                                                                                                                                                                                                                                                                                                                                                                                                                                                                                                                                 | 3.202678 | 0.000000 |          |          |   |   |      |          |  |  |  |  |      |          |          |  |  |  |     |          |          |          |  |  |      |          |          |          |          |  |      |          |          |          |          |          |     |          |          |          |          |          |      |          |          |          |          |          |      |          |          |          |          |          |     |          |          |          |          |          |  |   |   |   |   |  |     |          |  |  |  |  |      |          |          |  |  |  |      |          |          |          |  |  |     |          |          |          |          |  |
| 4 Se                                                                                                                            | 2.087473                                                                                                                                                                                                                                                                                                                                                                                                                                                                                                                                                                                                                                                                                                                                                                                                                                                                                                                                                                                                                                                                                                                                                                                                                                                                                                                                                                                                                                                                                                 | 3.090254 | 2.167243 | 0.000000 |          |   |   |      |          |  |  |  |  |      |          |          |  |  |  |     |          |          |          |  |  |      |          |          |          |          |  |      |          |          |          |          |          |     |          |          |          |          |          |      |          |          |          |          |          |      |          |          |          |          |          |     |          |          |          |          |          |  |   |   |   |   |  |     |          |  |  |  |  |      |          |          |  |  |  |      |          |          |          |  |  |     |          |          |          |          |  |
| 5 Co                                                                                                                            | 2.064737                                                                                                                                                                                                                                                                                                                                                                                                                                                                                                                                                                                                                                                                                                                                                                                                                                                                                                                                                                                                                                                                                                                                                                                                                                                                                                                                                                                                                                                                                                 | 2.372019 | 3.026350 | 3.581351 | 0.000000 |   |   |      |          |  |  |  |  |      |          |          |  |  |  |     |          |          |          |  |  |      |          |          |          |          |  |      |          |          |          |          |          |     |          |          |          |          |          |      |          |          |          |          |          |      |          |          |          |          |          |     |          |          |          |          |          |  |   |   |   |   |  |     |          |  |  |  |  |      |          |          |  |  |  |      |          |          |          |  |  |     |          |          |          |          |  |
| 6 B                                                                                                                             | 1.846274                                                                                                                                                                                                                                                                                                                                                                                                                                                                                                                                                                                                                                                                                                                                                                                                                                                                                                                                                                                                                                                                                                                                                                                                                                                                                                                                                                                                                                                                                                 | 3.205896 | 1.933472 | 2.151167 | 2.103974 |   |   |      |          |  |  |  |  |      |          |          |  |  |  |     |          |          |          |  |  |      |          |          |          |          |  |      |          |          |          |          |          |     |          |          |          |          |          |      |          |          |          |          |          |      |          |          |          |          |          |     |          |          |          |          |          |  |   |   |   |   |  |     |          |  |  |  |  |      |          |          |  |  |  |      |          |          |          |  |  |     |          |          |          |          |  |
| 7 B                                                                                                                             | 3.003624                                                                                                                                                                                                                                                                                                                                                                                                                                                                                                                                                                                                                                                                                                                                                                                                                                                                                                                                                                                                                                                                                                                                                                                                                                                                                                                                                                                                                                                                                                 | 3.374086 | 1.676409 | 3.281730 | 2.018847 |   |   |      |          |  |  |  |  |      |          |          |  |  |  |     |          |          |          |  |  |      |          |          |          |          |  |      |          |          |          |          |          |     |          |          |          |          |          |      |          |          |          |          |          |      |          |          |          |          |          |     |          |          |          |          |          |  |   |   |   |   |  |     |          |  |  |  |  |      |          |          |  |  |  |      |          |          |          |  |  |     |          |          |          |          |  |
| 8 B                                                                                                                             | 2.969020                                                                                                                                                                                                                                                                                                                                                                                                                                                                                                                                                                                                                                                                                                                                                                                                                                                                                                                                                                                                                                                                                                                                                                                                                                                                                                                                                                                                                                                                                                 | 2.277280 | 1.728320 | 3.207773 | 2.240765 |   |   |      |          |  |  |  |  |      |          |          |  |  |  |     |          |          |          |  |  |      |          |          |          |          |  |      |          |          |          |          |          |     |          |          |          |          |          |      |          |          |          |          |          |      |          |          |          |          |          |     |          |          |          |          |          |  |   |   |   |   |  |     |          |  |  |  |  |      |          |          |  |  |  |      |          |          |          |  |  |     |          |          |          |          |  |
| 9 B                                                                                                                             | 2.692335                                                                                                                                                                                                                                                                                                                                                                                                                                                                                                                                                                                                                                                                                                                                                                                                                                                                                                                                                                                                                                                                                                                                                                                                                                                                                                                                                                                                                                                                                                 | 2.049778 | 1.787362 | 2.096576 | 3.257063 |   |   |      |          |  |  |  |  |      |          |          |  |  |  |     |          |          |          |  |  |      |          |          |          |          |  |      |          |          |          |          |          |     |          |          |          |          |          |      |          |          |          |          |          |      |          |          |          |          |          |     |          |          |          |          |          |  |   |   |   |   |  |     |          |  |  |  |  |      |          |          |  |  |  |      |          |          |          |  |  |     |          |          |          |          |  |
|                                                                                                                                 | 6                                                                                                                                                                                                                                                                                                                                                                                                                                                                                                                                                                                                                                                                                                                                                                                                                                                                                                                                                                                                                                                                                                                                                                                                                                                                                                                                                                                                                                                                                                        | 7        | 8        | 9        |          |   |   |      |          |  |  |  |  |      |          |          |  |  |  |     |          |          |          |  |  |      |          |          |          |          |  |      |          |          |          |          |          |     |          |          |          |          |          |      |          |          |          |          |          |      |          |          |          |          |          |     |          |          |          |          |          |  |   |   |   |   |  |     |          |  |  |  |  |      |          |          |  |  |  |      |          |          |          |  |  |     |          |          |          |          |  |
| 6 B                                                                                                                             | 0.000000                                                                                                                                                                                                                                                                                                                                                                                                                                                                                                                                                                                                                                                                                                                                                                                                                                                                                                                                                                                                                                                                                                                                                                                                                                                                                                                                                                                                                                                                                                 |          |          |          |          |   |   |      |          |  |  |  |  |      |          |          |  |  |  |     |          |          |          |  |  |      |          |          |          |          |  |      |          |          |          |          |          |     |          |          |          |          |          |      |          |          |          |          |          |      |          |          |          |          |          |     |          |          |          |          |          |  |   |   |   |   |  |     |          |  |  |  |  |      |          |          |  |  |  |      |          |          |          |  |  |     |          |          |          |          |  |
| 7 B                                                                                                                             | 1.699838                                                                                                                                                                                                                                                                                                                                                                                                                                                                                                                                                                                                                                                                                                                                                                                                                                                                                                                                                                                                                                                                                                                                                                                                                                                                                                                                                                                                                                                                                                 | 0.000000 |          |          |          |   |   |      |          |  |  |  |  |      |          |          |  |  |  |     |          |          |          |  |  |      |          |          |          |          |  |      |          |          |          |          |          |     |          |          |          |          |          |      |          |          |          |          |          |      |          |          |          |          |          |     |          |          |          |          |          |  |   |   |   |   |  |     |          |  |  |  |  |      |          |          |  |  |  |      |          |          |          |  |  |     |          |          |          |          |  |
| 8 B                                                                                                                             | 2.608711                                                                                                                                                                                                                                                                                                                                                                                                                                                                                                                                                                                                                                                                                                                                                                                                                                                                                                                                                                                                                                                                                                                                                                                                                                                                                                                                                                                                                                                                                                 | 1.681288 | 0.000000 |          |          |   |   |      |          |  |  |  |  |      |          |          |  |  |  |     |          |          |          |  |  |      |          |          |          |          |  |      |          |          |          |          |          |     |          |          |          |          |          |      |          |          |          |          |          |      |          |          |          |          |          |     |          |          |          |          |          |  |   |   |   |   |  |     |          |  |  |  |  |      |          |          |  |  |  |      |          |          |          |  |  |     |          |          |          |          |  |
| 9 B                                                                                                                             | 2.889952                                                                                                                                                                                                                                                                                                                                                                                                                                                                                                                                                                                                                                                                                                                                                                                                                                                                                                                                                                                                                                                                                                                                                                                                                                                                                                                                                                                                                                                                                                 | 2.921172 | 1.805252 | 0.000000 |          |   |   |      |          |  |  |  |  |      |          |          |  |  |  |     |          |          |          |  |  |      |          |          |          |          |  |      |          |          |          |          |          |     |          |          |          |          |          |      |          |          |          |          |          |      |          |          |          |          |          |     |          |          |          |          |          |  |   |   |   |   |  |     |          |  |  |  |  |      |          |          |  |  |  |      |          |          |          |  |  |     |          |          |          |          |  |
|  <p>8. -6531.8648202 +14.0 C<sub>1</sub></p>  | <table border="1"> <thead> <tr> <th></th> <th>1</th> <th>2</th> <th>3</th> <th>4</th> <th>5</th> </tr> </thead> <tbody> <tr><td>1 B</td><td>0.000000</td><td></td><td></td><td></td><td></td></tr> <tr><td>2 B</td><td>2.845520</td><td>0.000000</td><td></td><td></td><td></td></tr> <tr><td>3 B</td><td>1.828604</td><td>1.728941</td><td>0.000000</td><td></td><td></td></tr> <tr><td>4 B</td><td>1.780474</td><td>1.860963</td><td>1.789898</td><td>0.000000</td><td></td></tr> <tr><td>5 Se</td><td>3.257015</td><td>1.999433</td><td>3.220095</td><td>2.059106</td><td>0.000000</td></tr> <tr><td>6 B</td><td>1.799785</td><td>2.773573</td><td>2.875096</td><td>1.807638</td><td>2.002096</td></tr> <tr><td>7 Se</td><td>2.176296</td><td>3.138229</td><td>2.923598</td><td>3.139704</td><td>3.299014</td></tr> <tr><td>8 Co</td><td>2.057902</td><td>3.339052</td><td>2.028247</td><td>3.337140</td><td>4.521453</td></tr> <tr><td>9 B</td><td>2.598864</td><td>1.807323</td><td>1.764931</td><td>2.829767</td><td>3.175353</td></tr> <tr> <th></th> <th>6</th> <th>7</th> <th>8</th> <th>9</th> <th></th> </tr> <tr><td>6 B</td><td>0.000000</td><td></td><td></td><td></td><td></td></tr> <tr><td>7 Se</td><td>2.107045</td><td>0.000000</td><td></td><td></td><td></td></tr> <tr><td>8 Co</td><td>3.458100</td><td>2.329490</td><td>0.000000</td><td></td><td></td></tr> <tr><td>9 B</td><td>3.021446</td><td>2.078595</td><td>2.035344</td><td>0.000000</td><td></td></tr> </tbody> </table> |          | 1        | 2        | 3        | 4 | 5 | 1 B  | 0.000000 |  |  |  |  | 2 B  | 2.845520 | 0.000000 |  |  |  | 3 B | 1.828604 | 1.728941 | 0.000000 |  |  | 4 B  | 1.780474 | 1.860963 | 1.789898 | 0.000000 |  | 5 Se | 3.257015 | 1.999433 | 3.220095 | 2.059106 | 0.000000 | 6 B | 1.799785 | 2.773573 | 2.875096 | 1.807638 | 2.002096 | 7 Se | 2.176296 | 3.138229 | 2.923598 | 3.139704 | 3.299014 | 8 Co | 2.057902 | 3.339052 | 2.028247 | 3.337140 | 4.521453 | 9 B | 2.598864 | 1.807323 | 1.764931 | 2.829767 | 3.175353 |  | 6 | 7 | 8 | 9 |  | 6 B | 0.000000 |  |  |  |  | 7 Se | 2.107045 | 0.000000 |  |  |  | 8 Co | 3.458100 | 2.329490 | 0.000000 |  |  | 9 B | 3.021446 | 2.078595 | 2.035344 | 0.000000 |  |
|                                                                                                                                 | 1                                                                                                                                                                                                                                                                                                                                                                                                                                                                                                                                                                                                                                                                                                                                                                                                                                                                                                                                                                                                                                                                                                                                                                                                                                                                                                                                                                                                                                                                                                        | 2        | 3        | 4        | 5        |   |   |      |          |  |  |  |  |      |          |          |  |  |  |     |          |          |          |  |  |      |          |          |          |          |  |      |          |          |          |          |          |     |          |          |          |          |          |      |          |          |          |          |          |      |          |          |          |          |          |     |          |          |          |          |          |  |   |   |   |   |  |     |          |  |  |  |  |      |          |          |  |  |  |      |          |          |          |  |  |     |          |          |          |          |  |
| 1 B                                                                                                                             | 0.000000                                                                                                                                                                                                                                                                                                                                                                                                                                                                                                                                                                                                                                                                                                                                                                                                                                                                                                                                                                                                                                                                                                                                                                                                                                                                                                                                                                                                                                                                                                 |          |          |          |          |   |   |      |          |  |  |  |  |      |          |          |  |  |  |     |          |          |          |  |  |      |          |          |          |          |  |      |          |          |          |          |          |     |          |          |          |          |          |      |          |          |          |          |          |      |          |          |          |          |          |     |          |          |          |          |          |  |   |   |   |   |  |     |          |  |  |  |  |      |          |          |  |  |  |      |          |          |          |  |  |     |          |          |          |          |  |
| 2 B                                                                                                                             | 2.845520                                                                                                                                                                                                                                                                                                                                                                                                                                                                                                                                                                                                                                                                                                                                                                                                                                                                                                                                                                                                                                                                                                                                                                                                                                                                                                                                                                                                                                                                                                 | 0.000000 |          |          |          |   |   |      |          |  |  |  |  |      |          |          |  |  |  |     |          |          |          |  |  |      |          |          |          |          |  |      |          |          |          |          |          |     |          |          |          |          |          |      |          |          |          |          |          |      |          |          |          |          |          |     |          |          |          |          |          |  |   |   |   |   |  |     |          |  |  |  |  |      |          |          |  |  |  |      |          |          |          |  |  |     |          |          |          |          |  |
| 3 B                                                                                                                             | 1.828604                                                                                                                                                                                                                                                                                                                                                                                                                                                                                                                                                                                                                                                                                                                                                                                                                                                                                                                                                                                                                                                                                                                                                                                                                                                                                                                                                                                                                                                                                                 | 1.728941 | 0.000000 |          |          |   |   |      |          |  |  |  |  |      |          |          |  |  |  |     |          |          |          |  |  |      |          |          |          |          |  |      |          |          |          |          |          |     |          |          |          |          |          |      |          |          |          |          |          |      |          |          |          |          |          |     |          |          |          |          |          |  |   |   |   |   |  |     |          |  |  |  |  |      |          |          |  |  |  |      |          |          |          |  |  |     |          |          |          |          |  |
| 4 B                                                                                                                             | 1.780474                                                                                                                                                                                                                                                                                                                                                                                                                                                                                                                                                                                                                                                                                                                                                                                                                                                                                                                                                                                                                                                                                                                                                                                                                                                                                                                                                                                                                                                                                                 | 1.860963 | 1.789898 | 0.000000 |          |   |   |      |          |  |  |  |  |      |          |          |  |  |  |     |          |          |          |  |  |      |          |          |          |          |  |      |          |          |          |          |          |     |          |          |          |          |          |      |          |          |          |          |          |      |          |          |          |          |          |     |          |          |          |          |          |  |   |   |   |   |  |     |          |  |  |  |  |      |          |          |  |  |  |      |          |          |          |  |  |     |          |          |          |          |  |
| 5 Se                                                                                                                            | 3.257015                                                                                                                                                                                                                                                                                                                                                                                                                                                                                                                                                                                                                                                                                                                                                                                                                                                                                                                                                                                                                                                                                                                                                                                                                                                                                                                                                                                                                                                                                                 | 1.999433 | 3.220095 | 2.059106 | 0.000000 |   |   |      |          |  |  |  |  |      |          |          |  |  |  |     |          |          |          |  |  |      |          |          |          |          |  |      |          |          |          |          |          |     |          |          |          |          |          |      |          |          |          |          |          |      |          |          |          |          |          |     |          |          |          |          |          |  |   |   |   |   |  |     |          |  |  |  |  |      |          |          |  |  |  |      |          |          |          |  |  |     |          |          |          |          |  |
| 6 B                                                                                                                             | 1.799785                                                                                                                                                                                                                                                                                                                                                                                                                                                                                                                                                                                                                                                                                                                                                                                                                                                                                                                                                                                                                                                                                                                                                                                                                                                                                                                                                                                                                                                                                                 | 2.773573 | 2.875096 | 1.807638 | 2.002096 |   |   |      |          |  |  |  |  |      |          |          |  |  |  |     |          |          |          |  |  |      |          |          |          |          |  |      |          |          |          |          |          |     |          |          |          |          |          |      |          |          |          |          |          |      |          |          |          |          |          |     |          |          |          |          |          |  |   |   |   |   |  |     |          |  |  |  |  |      |          |          |  |  |  |      |          |          |          |  |  |     |          |          |          |          |  |
| 7 Se                                                                                                                            | 2.176296                                                                                                                                                                                                                                                                                                                                                                                                                                                                                                                                                                                                                                                                                                                                                                                                                                                                                                                                                                                                                                                                                                                                                                                                                                                                                                                                                                                                                                                                                                 | 3.138229 | 2.923598 | 3.139704 | 3.299014 |   |   |      |          |  |  |  |  |      |          |          |  |  |  |     |          |          |          |  |  |      |          |          |          |          |  |      |          |          |          |          |          |     |          |          |          |          |          |      |          |          |          |          |          |      |          |          |          |          |          |     |          |          |          |          |          |  |   |   |   |   |  |     |          |  |  |  |  |      |          |          |  |  |  |      |          |          |          |  |  |     |          |          |          |          |  |
| 8 Co                                                                                                                            | 2.057902                                                                                                                                                                                                                                                                                                                                                                                                                                                                                                                                                                                                                                                                                                                                                                                                                                                                                                                                                                                                                                                                                                                                                                                                                                                                                                                                                                                                                                                                                                 | 3.339052 | 2.028247 | 3.337140 | 4.521453 |   |   |      |          |  |  |  |  |      |          |          |  |  |  |     |          |          |          |  |  |      |          |          |          |          |  |      |          |          |          |          |          |     |          |          |          |          |          |      |          |          |          |          |          |      |          |          |          |          |          |     |          |          |          |          |          |  |   |   |   |   |  |     |          |  |  |  |  |      |          |          |  |  |  |      |          |          |          |  |  |     |          |          |          |          |  |
| 9 B                                                                                                                             | 2.598864                                                                                                                                                                                                                                                                                                                                                                                                                                                                                                                                                                                                                                                                                                                                                                                                                                                                                                                                                                                                                                                                                                                                                                                                                                                                                                                                                                                                                                                                                                 | 1.807323 | 1.764931 | 2.829767 | 3.175353 |   |   |      |          |  |  |  |  |      |          |          |  |  |  |     |          |          |          |  |  |      |          |          |          |          |  |      |          |          |          |          |          |     |          |          |          |          |          |      |          |          |          |          |          |      |          |          |          |          |          |     |          |          |          |          |          |  |   |   |   |   |  |     |          |  |  |  |  |      |          |          |  |  |  |      |          |          |          |  |  |     |          |          |          |          |  |
|                                                                                                                                 | 6                                                                                                                                                                                                                                                                                                                                                                                                                                                                                                                                                                                                                                                                                                                                                                                                                                                                                                                                                                                                                                                                                                                                                                                                                                                                                                                                                                                                                                                                                                        | 7        | 8        | 9        |          |   |   |      |          |  |  |  |  |      |          |          |  |  |  |     |          |          |          |  |  |      |          |          |          |          |  |      |          |          |          |          |          |     |          |          |          |          |          |      |          |          |          |          |          |      |          |          |          |          |          |     |          |          |          |          |          |  |   |   |   |   |  |     |          |  |  |  |  |      |          |          |  |  |  |      |          |          |          |  |  |     |          |          |          |          |  |
| 6 B                                                                                                                             | 0.000000                                                                                                                                                                                                                                                                                                                                                                                                                                                                                                                                                                                                                                                                                                                                                                                                                                                                                                                                                                                                                                                                                                                                                                                                                                                                                                                                                                                                                                                                                                 |          |          |          |          |   |   |      |          |  |  |  |  |      |          |          |  |  |  |     |          |          |          |  |  |      |          |          |          |          |  |      |          |          |          |          |          |     |          |          |          |          |          |      |          |          |          |          |          |      |          |          |          |          |          |     |          |          |          |          |          |  |   |   |   |   |  |     |          |  |  |  |  |      |          |          |  |  |  |      |          |          |          |  |  |     |          |          |          |          |  |
| 7 Se                                                                                                                            | 2.107045                                                                                                                                                                                                                                                                                                                                                                                                                                                                                                                                                                                                                                                                                                                                                                                                                                                                                                                                                                                                                                                                                                                                                                                                                                                                                                                                                                                                                                                                                                 | 0.000000 |          |          |          |   |   |      |          |  |  |  |  |      |          |          |  |  |  |     |          |          |          |  |  |      |          |          |          |          |  |      |          |          |          |          |          |     |          |          |          |          |          |      |          |          |          |          |          |      |          |          |          |          |          |     |          |          |          |          |          |  |   |   |   |   |  |     |          |  |  |  |  |      |          |          |  |  |  |      |          |          |          |  |  |     |          |          |          |          |  |
| 8 Co                                                                                                                            | 3.458100                                                                                                                                                                                                                                                                                                                                                                                                                                                                                                                                                                                                                                                                                                                                                                                                                                                                                                                                                                                                                                                                                                                                                                                                                                                                                                                                                                                                                                                                                                 | 2.329490 | 0.000000 |          |          |   |   |      |          |  |  |  |  |      |          |          |  |  |  |     |          |          |          |  |  |      |          |          |          |          |  |      |          |          |          |          |          |     |          |          |          |          |          |      |          |          |          |          |          |      |          |          |          |          |          |     |          |          |          |          |          |  |   |   |   |   |  |     |          |  |  |  |  |      |          |          |  |  |  |      |          |          |          |  |  |     |          |          |          |          |  |
| 9 B                                                                                                                             | 3.021446                                                                                                                                                                                                                                                                                                                                                                                                                                                                                                                                                                                                                                                                                                                                                                                                                                                                                                                                                                                                                                                                                                                                                                                                                                                                                                                                                                                                                                                                                                 | 2.078595 | 2.035344 | 0.000000 |          |   |   |      |          |  |  |  |  |      |          |          |  |  |  |     |          |          |          |  |  |      |          |          |          |          |  |      |          |          |          |          |          |     |          |          |          |          |          |      |          |          |          |          |          |      |          |          |          |          |          |     |          |          |          |          |          |  |   |   |   |   |  |     |          |  |  |  |  |      |          |          |  |  |  |      |          |          |          |  |  |     |          |          |          |          |  |
|  <p>9. -6531.8622163 +15.6 C<sub>1</sub></p> | <table border="1"> <thead> <tr> <th></th> <th>1</th> <th>2</th> <th>3</th> <th>4</th> <th>5</th> </tr> </thead> <tbody> <tr><td>1 Co</td><td>0.000000</td><td></td><td></td><td></td><td></td></tr> <tr><td>2 B</td><td>3.239685</td><td>0.000000</td><td></td><td></td><td></td></tr> <tr><td>3 B</td><td>2.127682</td><td>1.785448</td><td>0.000000</td><td></td><td></td></tr> <tr><td>4 B</td><td>2.036436</td><td>1.831567</td><td>1.815110</td><td>0.000000</td><td></td></tr> <tr><td>5 B</td><td>3.295851</td><td>1.767031</td><td>2.951348</td><td>1.680769</td><td>0.000000</td></tr> <tr><td>6 B</td><td>2.056413</td><td>2.646902</td><td>2.835517</td><td>1.753991</td><td>1.749460</td></tr> <tr><td>7 Se</td><td>3.543243</td><td>2.165010</td><td>3.144412</td><td>2.914008</td><td>2.034925</td></tr> <tr><td>8 Se</td><td>2.315264</td><td>3.252803</td><td>2.049791</td><td>3.343233</td><td>4.171106</td></tr> <tr><td>9 B</td><td>3.183456</td><td>1.794464</td><td>1.849494</td><td>2.918125</td><td>3.082104</td></tr> <tr> <th></th> <th>6</th> <th>7</th> <th>8</th> <th>9</th> <th></th> </tr> <tr><td>6 B</td><td>0.000000</td><td></td><td></td><td></td><td></td></tr> <tr><td>7 Se</td><td>2.151762</td><td>0.000000</td><td></td><td></td><td></td></tr> <tr><td>8 Se</td><td>3.336018</td><td>3.370753</td><td>0.000000</td><td></td><td></td></tr> <tr><td>9 B</td><td>3.090464</td><td>2.105503</td><td>1.973386</td><td>0.000000</td><td></td></tr> </tbody> </table> |          | 1        | 2        | 3        | 4 | 5 | 1 Co | 0.000000 |  |  |  |  | 2 B  | 3.239685 | 0.000000 |  |  |  | 3 B | 2.127682 | 1.785448 | 0.000000 |  |  | 4 B  | 2.036436 | 1.831567 | 1.815110 | 0.000000 |  | 5 B  | 3.295851 | 1.767031 | 2.951348 | 1.680769 | 0.000000 | 6 B | 2.056413 | 2.646902 | 2.835517 | 1.753991 | 1.749460 | 7 Se | 3.543243 | 2.165010 | 3.144412 | 2.914008 | 2.034925 | 8 Se | 2.315264 | 3.252803 | 2.049791 | 3.343233 | 4.171106 | 9 B | 3.183456 | 1.794464 | 1.849494 | 2.918125 | 3.082104 |  | 6 | 7 | 8 | 9 |  | 6 B | 0.000000 |  |  |  |  | 7 Se | 2.151762 | 0.000000 |  |  |  | 8 Se | 3.336018 | 3.370753 | 0.000000 |  |  | 9 B | 3.090464 | 2.105503 | 1.973386 | 0.000000 |  |
|                                                                                                                                 | 1                                                                                                                                                                                                                                                                                                                                                                                                                                                                                                                                                                                                                                                                                                                                                                                                                                                                                                                                                                                                                                                                                                                                                                                                                                                                                                                                                                                                                                                                                                        | 2        | 3        | 4        | 5        |   |   |      |          |  |  |  |  |      |          |          |  |  |  |     |          |          |          |  |  |      |          |          |          |          |  |      |          |          |          |          |          |     |          |          |          |          |          |      |          |          |          |          |          |      |          |          |          |          |          |     |          |          |          |          |          |  |   |   |   |   |  |     |          |  |  |  |  |      |          |          |  |  |  |      |          |          |          |  |  |     |          |          |          |          |  |
| 1 Co                                                                                                                            | 0.000000                                                                                                                                                                                                                                                                                                                                                                                                                                                                                                                                                                                                                                                                                                                                                                                                                                                                                                                                                                                                                                                                                                                                                                                                                                                                                                                                                                                                                                                                                                 |          |          |          |          |   |   |      |          |  |  |  |  |      |          |          |  |  |  |     |          |          |          |  |  |      |          |          |          |          |  |      |          |          |          |          |          |     |          |          |          |          |          |      |          |          |          |          |          |      |          |          |          |          |          |     |          |          |          |          |          |  |   |   |   |   |  |     |          |  |  |  |  |      |          |          |  |  |  |      |          |          |          |  |  |     |          |          |          |          |  |
| 2 B                                                                                                                             | 3.239685                                                                                                                                                                                                                                                                                                                                                                                                                                                                                                                                                                                                                                                                                                                                                                                                                                                                                                                                                                                                                                                                                                                                                                                                                                                                                                                                                                                                                                                                                                 | 0.000000 |          |          |          |   |   |      |          |  |  |  |  |      |          |          |  |  |  |     |          |          |          |  |  |      |          |          |          |          |  |      |          |          |          |          |          |     |          |          |          |          |          |      |          |          |          |          |          |      |          |          |          |          |          |     |          |          |          |          |          |  |   |   |   |   |  |     |          |  |  |  |  |      |          |          |  |  |  |      |          |          |          |  |  |     |          |          |          |          |  |
| 3 B                                                                                                                             | 2.127682                                                                                                                                                                                                                                                                                                                                                                                                                                                                                                                                                                                                                                                                                                                                                                                                                                                                                                                                                                                                                                                                                                                                                                                                                                                                                                                                                                                                                                                                                                 | 1.785448 | 0.000000 |          |          |   |   |      |          |  |  |  |  |      |          |          |  |  |  |     |          |          |          |  |  |      |          |          |          |          |  |      |          |          |          |          |          |     |          |          |          |          |          |      |          |          |          |          |          |      |          |          |          |          |          |     |          |          |          |          |          |  |   |   |   |   |  |     |          |  |  |  |  |      |          |          |  |  |  |      |          |          |          |  |  |     |          |          |          |          |  |
| 4 B                                                                                                                             | 2.036436                                                                                                                                                                                                                                                                                                                                                                                                                                                                                                                                                                                                                                                                                                                                                                                                                                                                                                                                                                                                                                                                                                                                                                                                                                                                                                                                                                                                                                                                                                 | 1.831567 | 1.815110 | 0.000000 |          |   |   |      |          |  |  |  |  |      |          |          |  |  |  |     |          |          |          |  |  |      |          |          |          |          |  |      |          |          |          |          |          |     |          |          |          |          |          |      |          |          |          |          |          |      |          |          |          |          |          |     |          |          |          |          |          |  |   |   |   |   |  |     |          |  |  |  |  |      |          |          |  |  |  |      |          |          |          |  |  |     |          |          |          |          |  |
| 5 B                                                                                                                             | 3.295851                                                                                                                                                                                                                                                                                                                                                                                                                                                                                                                                                                                                                                                                                                                                                                                                                                                                                                                                                                                                                                                                                                                                                                                                                                                                                                                                                                                                                                                                                                 | 1.767031 | 2.951348 | 1.680769 | 0.000000 |   |   |      |          |  |  |  |  |      |          |          |  |  |  |     |          |          |          |  |  |      |          |          |          |          |  |      |          |          |          |          |          |     |          |          |          |          |          |      |          |          |          |          |          |      |          |          |          |          |          |     |          |          |          |          |          |  |   |   |   |   |  |     |          |  |  |  |  |      |          |          |  |  |  |      |          |          |          |  |  |     |          |          |          |          |  |
| 6 B                                                                                                                             | 2.056413                                                                                                                                                                                                                                                                                                                                                                                                                                                                                                                                                                                                                                                                                                                                                                                                                                                                                                                                                                                                                                                                                                                                                                                                                                                                                                                                                                                                                                                                                                 | 2.646902 | 2.835517 | 1.753991 | 1.749460 |   |   |      |          |  |  |  |  |      |          |          |  |  |  |     |          |          |          |  |  |      |          |          |          |          |  |      |          |          |          |          |          |     |          |          |          |          |          |      |          |          |          |          |          |      |          |          |          |          |          |     |          |          |          |          |          |  |   |   |   |   |  |     |          |  |  |  |  |      |          |          |  |  |  |      |          |          |          |  |  |     |          |          |          |          |  |
| 7 Se                                                                                                                            | 3.543243                                                                                                                                                                                                                                                                                                                                                                                                                                                                                                                                                                                                                                                                                                                                                                                                                                                                                                                                                                                                                                                                                                                                                                                                                                                                                                                                                                                                                                                                                                 | 2.165010 | 3.144412 | 2.914008 | 2.034925 |   |   |      |          |  |  |  |  |      |          |          |  |  |  |     |          |          |          |  |  |      |          |          |          |          |  |      |          |          |          |          |          |     |          |          |          |          |          |      |          |          |          |          |          |      |          |          |          |          |          |     |          |          |          |          |          |  |   |   |   |   |  |     |          |  |  |  |  |      |          |          |  |  |  |      |          |          |          |  |  |     |          |          |          |          |  |
| 8 Se                                                                                                                            | 2.315264                                                                                                                                                                                                                                                                                                                                                                                                                                                                                                                                                                                                                                                                                                                                                                                                                                                                                                                                                                                                                                                                                                                                                                                                                                                                                                                                                                                                                                                                                                 | 3.252803 | 2.049791 | 3.343233 | 4.171106 |   |   |      |          |  |  |  |  |      |          |          |  |  |  |     |          |          |          |  |  |      |          |          |          |          |  |      |          |          |          |          |          |     |          |          |          |          |          |      |          |          |          |          |          |      |          |          |          |          |          |     |          |          |          |          |          |  |   |   |   |   |  |     |          |  |  |  |  |      |          |          |  |  |  |      |          |          |          |  |  |     |          |          |          |          |  |
| 9 B                                                                                                                             | 3.183456                                                                                                                                                                                                                                                                                                                                                                                                                                                                                                                                                                                                                                                                                                                                                                                                                                                                                                                                                                                                                                                                                                                                                                                                                                                                                                                                                                                                                                                                                                 | 1.794464 | 1.849494 | 2.918125 | 3.082104 |   |   |      |          |  |  |  |  |      |          |          |  |  |  |     |          |          |          |  |  |      |          |          |          |          |  |      |          |          |          |          |          |     |          |          |          |          |          |      |          |          |          |          |          |      |          |          |          |          |          |     |          |          |          |          |          |  |   |   |   |   |  |     |          |  |  |  |  |      |          |          |  |  |  |      |          |          |          |  |  |     |          |          |          |          |  |
|                                                                                                                                 | 6                                                                                                                                                                                                                                                                                                                                                                                                                                                                                                                                                                                                                                                                                                                                                                                                                                                                                                                                                                                                                                                                                                                                                                                                                                                                                                                                                                                                                                                                                                        | 7        | 8        | 9        |          |   |   |      |          |  |  |  |  |      |          |          |  |  |  |     |          |          |          |  |  |      |          |          |          |          |  |      |          |          |          |          |          |     |          |          |          |          |          |      |          |          |          |          |          |      |          |          |          |          |          |     |          |          |          |          |          |  |   |   |   |   |  |     |          |  |  |  |  |      |          |          |  |  |  |      |          |          |          |  |  |     |          |          |          |          |  |
| 6 B                                                                                                                             | 0.000000                                                                                                                                                                                                                                                                                                                                                                                                                                                                                                                                                                                                                                                                                                                                                                                                                                                                                                                                                                                                                                                                                                                                                                                                                                                                                                                                                                                                                                                                                                 |          |          |          |          |   |   |      |          |  |  |  |  |      |          |          |  |  |  |     |          |          |          |  |  |      |          |          |          |          |  |      |          |          |          |          |          |     |          |          |          |          |          |      |          |          |          |          |          |      |          |          |          |          |          |     |          |          |          |          |          |  |   |   |   |   |  |     |          |  |  |  |  |      |          |          |  |  |  |      |          |          |          |  |  |     |          |          |          |          |  |
| 7 Se                                                                                                                            | 2.151762                                                                                                                                                                                                                                                                                                                                                                                                                                                                                                                                                                                                                                                                                                                                                                                                                                                                                                                                                                                                                                                                                                                                                                                                                                                                                                                                                                                                                                                                                                 | 0.000000 |          |          |          |   |   |      |          |  |  |  |  |      |          |          |  |  |  |     |          |          |          |  |  |      |          |          |          |          |  |      |          |          |          |          |          |     |          |          |          |          |          |      |          |          |          |          |          |      |          |          |          |          |          |     |          |          |          |          |          |  |   |   |   |   |  |     |          |  |  |  |  |      |          |          |  |  |  |      |          |          |          |  |  |     |          |          |          |          |  |
| 8 Se                                                                                                                            | 3.336018                                                                                                                                                                                                                                                                                                                                                                                                                                                                                                                                                                                                                                                                                                                                                                                                                                                                                                                                                                                                                                                                                                                                                                                                                                                                                                                                                                                                                                                                                                 | 3.370753 | 0.000000 |          |          |   |   |      |          |  |  |  |  |      |          |          |  |  |  |     |          |          |          |  |  |      |          |          |          |          |  |      |          |          |          |          |          |     |          |          |          |          |          |      |          |          |          |          |          |      |          |          |          |          |          |     |          |          |          |          |          |  |   |   |   |   |  |     |          |  |  |  |  |      |          |          |  |  |  |      |          |          |          |  |  |     |          |          |          |          |  |
| 9 B                                                                                                                             | 3.090464                                                                                                                                                                                                                                                                                                                                                                                                                                                                                                                                                                                                                                                                                                                                                                                                                                                                                                                                                                                                                                                                                                                                                                                                                                                                                                                                                                                                                                                                                                 | 2.105503 | 1.973386 | 0.000000 |          |   |   |      |          |  |  |  |  |      |          |          |  |  |  |     |          |          |          |  |  |      |          |          |          |          |  |      |          |          |          |          |          |     |          |          |          |          |          |      |          |          |          |          |          |      |          |          |          |          |          |     |          |          |          |          |          |  |   |   |   |   |  |     |          |  |  |  |  |      |          |          |  |  |  |      |          |          |          |  |  |     |          |          |          |          |  |

| 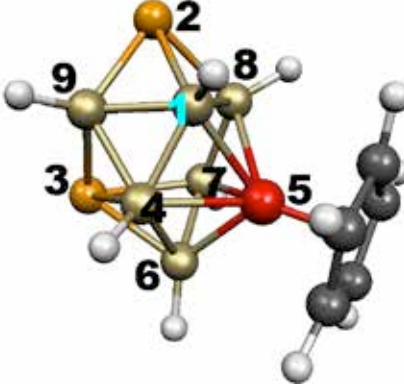 <p>10. -6531.8593560 +17.4 C<sub>1</sub></p>   | <table border="1"> <thead> <tr> <th></th> <th>1</th> <th>2</th> <th>3</th> <th>4</th> <th>5</th> </tr> </thead> <tbody> <tr><td>1 B</td><td>0.000000</td><td></td><td></td><td></td><td></td></tr> <tr><td>2 Se</td><td>2.054155</td><td>0.000000</td><td></td><td></td><td></td></tr> <tr><td>3 Se</td><td>3.127581</td><td>3.330232</td><td>0.000000</td><td></td><td></td></tr> <tr><td>4 B</td><td>1.754619</td><td>3.255172</td><td>2.175556</td><td>0.000000</td><td></td></tr> <tr><td>5 Co</td><td>2.053555</td><td>3.605623</td><td>3.295642</td><td>2.058609</td><td>0.000000</td></tr> <tr><td>6 B</td><td>3.033493</td><td>4.159923</td><td>2.046166</td><td>1.871256</td><td>1.925978</td></tr> <tr><td>7 B</td><td>2.855678</td><td>3.199311</td><td>2.142838</td><td>2.664656</td><td>2.113339</td></tr> <tr><td>8 B</td><td>1.985241</td><td>2.044170</td><td>3.086869</td><td>2.886708</td><td>2.106926</td></tr> <tr><td>9 B</td><td>1.813869</td><td>1.999671</td><td>2.074498</td><td>1.806386</td><td>3.257057</td></tr> <tr> <th></th> <th>6</th> <th>7</th> <th>8</th> <th>9</th> <th></th> </tr> <tr><td>6 B</td><td>0.000000</td><td></td><td></td><td></td><td></td></tr> <tr><td>7 B</td><td>1.750037</td><td>0.000000</td><td></td><td></td><td></td></tr> <tr><td>8 B</td><td>2.953878</td><td>1.683353</td><td>0.000000</td><td></td><td></td></tr> <tr><td>9 B</td><td>3.136213</td><td>3.042573</td><td>2.792882</td><td>0.000000</td><td></td></tr> </tbody> </table>  |          | 1        | 2        | 3        | 4 | 5 | 1 B | 0.000000 |  |  |  |  | 2 Se | 2.054155 | 0.000000 |  |  |  | 3 Se | 3.127581 | 3.330232 | 0.000000 |  |  | 4 B | 1.754619 | 3.255172 | 2.175556 | 0.000000 |  | 5 Co | 2.053555 | 3.605623 | 3.295642 | 2.058609 | 0.000000 | 6 B | 3.033493 | 4.159923 | 2.046166 | 1.871256 | 1.925978 | 7 B | 2.855678 | 3.199311 | 2.142838 | 2.664656 | 2.113339 | 8 B  | 1.985241 | 2.044170 | 3.086869 | 2.886708 | 2.106926 | 9 B  | 1.813869 | 1.999671 | 2.074498 | 1.806386 | 3.257057 |  | 6 | 7 | 8 | 9 |  | 6 B | 0.000000 |  |  |  |  | 7 B | 1.750037 | 0.000000 |  |  |  | 8 B  | 2.953878 | 1.683353 | 0.000000 |  |  | 9 B  | 3.136213 | 3.042573 | 2.792882 | 0.000000 |  |
|----------------------------------------------------------------------------------------------------------------------------------|---------------------------------------------------------------------------------------------------------------------------------------------------------------------------------------------------------------------------------------------------------------------------------------------------------------------------------------------------------------------------------------------------------------------------------------------------------------------------------------------------------------------------------------------------------------------------------------------------------------------------------------------------------------------------------------------------------------------------------------------------------------------------------------------------------------------------------------------------------------------------------------------------------------------------------------------------------------------------------------------------------------------------------------------------------------------------------------------------------------------------------------------------------------------------------------------------------------------------------------------------------------------------------------------------------------------------------------------------------------------------------------------------------------------------------------------------------------------------------------------------------|----------|----------|----------|----------|---|---|-----|----------|--|--|--|--|------|----------|----------|--|--|--|------|----------|----------|----------|--|--|-----|----------|----------|----------|----------|--|------|----------|----------|----------|----------|----------|-----|----------|----------|----------|----------|----------|-----|----------|----------|----------|----------|----------|------|----------|----------|----------|----------|----------|------|----------|----------|----------|----------|----------|--|---|---|---|---|--|-----|----------|--|--|--|--|-----|----------|----------|--|--|--|------|----------|----------|----------|--|--|------|----------|----------|----------|----------|--|
|                                                                                                                                  | 1                                                                                                                                                                                                                                                                                                                                                                                                                                                                                                                                                                                                                                                                                                                                                                                                                                                                                                                                                                                                                                                                                                                                                                                                                                                                                                                                                                                                                                                                                                       | 2        | 3        | 4        | 5        |   |   |     |          |  |  |  |  |      |          |          |  |  |  |      |          |          |          |  |  |     |          |          |          |          |  |      |          |          |          |          |          |     |          |          |          |          |          |     |          |          |          |          |          |      |          |          |          |          |          |      |          |          |          |          |          |  |   |   |   |   |  |     |          |  |  |  |  |     |          |          |  |  |  |      |          |          |          |  |  |      |          |          |          |          |  |
| 1 B                                                                                                                              | 0.000000                                                                                                                                                                                                                                                                                                                                                                                                                                                                                                                                                                                                                                                                                                                                                                                                                                                                                                                                                                                                                                                                                                                                                                                                                                                                                                                                                                                                                                                                                                |          |          |          |          |   |   |     |          |  |  |  |  |      |          |          |  |  |  |      |          |          |          |  |  |     |          |          |          |          |  |      |          |          |          |          |          |     |          |          |          |          |          |     |          |          |          |          |          |      |          |          |          |          |          |      |          |          |          |          |          |  |   |   |   |   |  |     |          |  |  |  |  |     |          |          |  |  |  |      |          |          |          |  |  |      |          |          |          |          |  |
| 2 Se                                                                                                                             | 2.054155                                                                                                                                                                                                                                                                                                                                                                                                                                                                                                                                                                                                                                                                                                                                                                                                                                                                                                                                                                                                                                                                                                                                                                                                                                                                                                                                                                                                                                                                                                | 0.000000 |          |          |          |   |   |     |          |  |  |  |  |      |          |          |  |  |  |      |          |          |          |  |  |     |          |          |          |          |  |      |          |          |          |          |          |     |          |          |          |          |          |     |          |          |          |          |          |      |          |          |          |          |          |      |          |          |          |          |          |  |   |   |   |   |  |     |          |  |  |  |  |     |          |          |  |  |  |      |          |          |          |  |  |      |          |          |          |          |  |
| 3 Se                                                                                                                             | 3.127581                                                                                                                                                                                                                                                                                                                                                                                                                                                                                                                                                                                                                                                                                                                                                                                                                                                                                                                                                                                                                                                                                                                                                                                                                                                                                                                                                                                                                                                                                                | 3.330232 | 0.000000 |          |          |   |   |     |          |  |  |  |  |      |          |          |  |  |  |      |          |          |          |  |  |     |          |          |          |          |  |      |          |          |          |          |          |     |          |          |          |          |          |     |          |          |          |          |          |      |          |          |          |          |          |      |          |          |          |          |          |  |   |   |   |   |  |     |          |  |  |  |  |     |          |          |  |  |  |      |          |          |          |  |  |      |          |          |          |          |  |
| 4 B                                                                                                                              | 1.754619                                                                                                                                                                                                                                                                                                                                                                                                                                                                                                                                                                                                                                                                                                                                                                                                                                                                                                                                                                                                                                                                                                                                                                                                                                                                                                                                                                                                                                                                                                | 3.255172 | 2.175556 | 0.000000 |          |   |   |     |          |  |  |  |  |      |          |          |  |  |  |      |          |          |          |  |  |     |          |          |          |          |  |      |          |          |          |          |          |     |          |          |          |          |          |     |          |          |          |          |          |      |          |          |          |          |          |      |          |          |          |          |          |  |   |   |   |   |  |     |          |  |  |  |  |     |          |          |  |  |  |      |          |          |          |  |  |      |          |          |          |          |  |
| 5 Co                                                                                                                             | 2.053555                                                                                                                                                                                                                                                                                                                                                                                                                                                                                                                                                                                                                                                                                                                                                                                                                                                                                                                                                                                                                                                                                                                                                                                                                                                                                                                                                                                                                                                                                                | 3.605623 | 3.295642 | 2.058609 | 0.000000 |   |   |     |          |  |  |  |  |      |          |          |  |  |  |      |          |          |          |  |  |     |          |          |          |          |  |      |          |          |          |          |          |     |          |          |          |          |          |     |          |          |          |          |          |      |          |          |          |          |          |      |          |          |          |          |          |  |   |   |   |   |  |     |          |  |  |  |  |     |          |          |  |  |  |      |          |          |          |  |  |      |          |          |          |          |  |
| 6 B                                                                                                                              | 3.033493                                                                                                                                                                                                                                                                                                                                                                                                                                                                                                                                                                                                                                                                                                                                                                                                                                                                                                                                                                                                                                                                                                                                                                                                                                                                                                                                                                                                                                                                                                | 4.159923 | 2.046166 | 1.871256 | 1.925978 |   |   |     |          |  |  |  |  |      |          |          |  |  |  |      |          |          |          |  |  |     |          |          |          |          |  |      |          |          |          |          |          |     |          |          |          |          |          |     |          |          |          |          |          |      |          |          |          |          |          |      |          |          |          |          |          |  |   |   |   |   |  |     |          |  |  |  |  |     |          |          |  |  |  |      |          |          |          |  |  |      |          |          |          |          |  |
| 7 B                                                                                                                              | 2.855678                                                                                                                                                                                                                                                                                                                                                                                                                                                                                                                                                                                                                                                                                                                                                                                                                                                                                                                                                                                                                                                                                                                                                                                                                                                                                                                                                                                                                                                                                                | 3.199311 | 2.142838 | 2.664656 | 2.113339 |   |   |     |          |  |  |  |  |      |          |          |  |  |  |      |          |          |          |  |  |     |          |          |          |          |  |      |          |          |          |          |          |     |          |          |          |          |          |     |          |          |          |          |          |      |          |          |          |          |          |      |          |          |          |          |          |  |   |   |   |   |  |     |          |  |  |  |  |     |          |          |  |  |  |      |          |          |          |  |  |      |          |          |          |          |  |
| 8 B                                                                                                                              | 1.985241                                                                                                                                                                                                                                                                                                                                                                                                                                                                                                                                                                                                                                                                                                                                                                                                                                                                                                                                                                                                                                                                                                                                                                                                                                                                                                                                                                                                                                                                                                | 2.044170 | 3.086869 | 2.886708 | 2.106926 |   |   |     |          |  |  |  |  |      |          |          |  |  |  |      |          |          |          |  |  |     |          |          |          |          |  |      |          |          |          |          |          |     |          |          |          |          |          |     |          |          |          |          |          |      |          |          |          |          |          |      |          |          |          |          |          |  |   |   |   |   |  |     |          |  |  |  |  |     |          |          |  |  |  |      |          |          |          |  |  |      |          |          |          |          |  |
| 9 B                                                                                                                              | 1.813869                                                                                                                                                                                                                                                                                                                                                                                                                                                                                                                                                                                                                                                                                                                                                                                                                                                                                                                                                                                                                                                                                                                                                                                                                                                                                                                                                                                                                                                                                                | 1.999671 | 2.074498 | 1.806386 | 3.257057 |   |   |     |          |  |  |  |  |      |          |          |  |  |  |      |          |          |          |  |  |     |          |          |          |          |  |      |          |          |          |          |          |     |          |          |          |          |          |     |          |          |          |          |          |      |          |          |          |          |          |      |          |          |          |          |          |  |   |   |   |   |  |     |          |  |  |  |  |     |          |          |  |  |  |      |          |          |          |  |  |      |          |          |          |          |  |
|                                                                                                                                  | 6                                                                                                                                                                                                                                                                                                                                                                                                                                                                                                                                                                                                                                                                                                                                                                                                                                                                                                                                                                                                                                                                                                                                                                                                                                                                                                                                                                                                                                                                                                       | 7        | 8        | 9        |          |   |   |     |          |  |  |  |  |      |          |          |  |  |  |      |          |          |          |  |  |     |          |          |          |          |  |      |          |          |          |          |          |     |          |          |          |          |          |     |          |          |          |          |          |      |          |          |          |          |          |      |          |          |          |          |          |  |   |   |   |   |  |     |          |  |  |  |  |     |          |          |  |  |  |      |          |          |          |  |  |      |          |          |          |          |  |
| 6 B                                                                                                                              | 0.000000                                                                                                                                                                                                                                                                                                                                                                                                                                                                                                                                                                                                                                                                                                                                                                                                                                                                                                                                                                                                                                                                                                                                                                                                                                                                                                                                                                                                                                                                                                |          |          |          |          |   |   |     |          |  |  |  |  |      |          |          |  |  |  |      |          |          |          |  |  |     |          |          |          |          |  |      |          |          |          |          |          |     |          |          |          |          |          |     |          |          |          |          |          |      |          |          |          |          |          |      |          |          |          |          |          |  |   |   |   |   |  |     |          |  |  |  |  |     |          |          |  |  |  |      |          |          |          |  |  |      |          |          |          |          |  |
| 7 B                                                                                                                              | 1.750037                                                                                                                                                                                                                                                                                                                                                                                                                                                                                                                                                                                                                                                                                                                                                                                                                                                                                                                                                                                                                                                                                                                                                                                                                                                                                                                                                                                                                                                                                                | 0.000000 |          |          |          |   |   |     |          |  |  |  |  |      |          |          |  |  |  |      |          |          |          |  |  |     |          |          |          |          |  |      |          |          |          |          |          |     |          |          |          |          |          |     |          |          |          |          |          |      |          |          |          |          |          |      |          |          |          |          |          |  |   |   |   |   |  |     |          |  |  |  |  |     |          |          |  |  |  |      |          |          |          |  |  |      |          |          |          |          |  |
| 8 B                                                                                                                              | 2.953878                                                                                                                                                                                                                                                                                                                                                                                                                                                                                                                                                                                                                                                                                                                                                                                                                                                                                                                                                                                                                                                                                                                                                                                                                                                                                                                                                                                                                                                                                                | 1.683353 | 0.000000 |          |          |   |   |     |          |  |  |  |  |      |          |          |  |  |  |      |          |          |          |  |  |     |          |          |          |          |  |      |          |          |          |          |          |     |          |          |          |          |          |     |          |          |          |          |          |      |          |          |          |          |          |      |          |          |          |          |          |  |   |   |   |   |  |     |          |  |  |  |  |     |          |          |  |  |  |      |          |          |          |  |  |      |          |          |          |          |  |
| 9 B                                                                                                                              | 3.136213                                                                                                                                                                                                                                                                                                                                                                                                                                                                                                                                                                                                                                                                                                                                                                                                                                                                                                                                                                                                                                                                                                                                                                                                                                                                                                                                                                                                                                                                                                | 3.042573 | 2.792882 | 0.000000 |          |   |   |     |          |  |  |  |  |      |          |          |  |  |  |      |          |          |          |  |  |     |          |          |          |          |  |      |          |          |          |          |          |     |          |          |          |          |          |     |          |          |          |          |          |      |          |          |          |          |          |      |          |          |          |          |          |  |   |   |   |   |  |     |          |  |  |  |  |     |          |          |  |  |  |      |          |          |          |  |  |      |          |          |          |          |  |
|  <p>11. -6531.8524357 +21.8 C<sub>1</sub></p>  | <table border="1"> <thead> <tr> <th></th> <th>1</th> <th>2</th> <th>3</th> <th>4</th> <th>5</th> </tr> </thead> <tbody> <tr><td>1 B</td><td>0.000000</td><td></td><td></td><td></td><td></td></tr> <tr><td>2 Co</td><td>3.490862</td><td>0.000000</td><td></td><td></td><td></td></tr> <tr><td>3 Se</td><td>3.125223</td><td>2.378150</td><td>0.000000</td><td></td><td></td></tr> <tr><td>4 B</td><td>1.814469</td><td>3.343658</td><td>3.147255</td><td>0.000000</td><td></td></tr> <tr><td>5 B</td><td>3.099347</td><td>2.186796</td><td>2.917423</td><td>1.842248</td><td>0.000000</td></tr> <tr><td>6 B</td><td>2.928360</td><td>3.069354</td><td>2.200064</td><td>1.712334</td><td>1.748891</td></tr> <tr><td>7 B</td><td>1.618953</td><td>3.470087</td><td>2.114918</td><td>1.805049</td><td>2.906511</td></tr> <tr><td>8 Se</td><td>1.986842</td><td>2.374563</td><td>3.453809</td><td>2.112953</td><td>2.166065</td></tr> <tr><td>9 B</td><td>3.895472</td><td>2.013234</td><td>2.018019</td><td>2.980935</td><td>1.699194</td></tr> <tr> <th></th> <th>6</th> <th>7</th> <th>8</th> <th>9</th> <th></th> </tr> <tr><td>6 B</td><td>0.000000</td><td></td><td></td><td></td><td></td></tr> <tr><td>7 B</td><td>1.862155</td><td>0.000000</td><td></td><td></td><td></td></tr> <tr><td>8 Se</td><td>3.155531</td><td>2.946542</td><td>0.000000</td><td></td><td></td></tr> <tr><td>9 B</td><td>1.772218</td><td>3.105560</td><td>3.360104</td><td>0.000000</td><td></td></tr> </tbody> </table> |          | 1        | 2        | 3        | 4 | 5 | 1 B | 0.000000 |  |  |  |  | 2 Co | 3.490862 | 0.000000 |  |  |  | 3 Se | 3.125223 | 2.378150 | 0.000000 |  |  | 4 B | 1.814469 | 3.343658 | 3.147255 | 0.000000 |  | 5 B  | 3.099347 | 2.186796 | 2.917423 | 1.842248 | 0.000000 | 6 B | 2.928360 | 3.069354 | 2.200064 | 1.712334 | 1.748891 | 7 B | 1.618953 | 3.470087 | 2.114918 | 1.805049 | 2.906511 | 8 Se | 1.986842 | 2.374563 | 3.453809 | 2.112953 | 2.166065 | 9 B  | 3.895472 | 2.013234 | 2.018019 | 2.980935 | 1.699194 |  | 6 | 7 | 8 | 9 |  | 6 B | 0.000000 |  |  |  |  | 7 B | 1.862155 | 0.000000 |  |  |  | 8 Se | 3.155531 | 2.946542 | 0.000000 |  |  | 9 B  | 1.772218 | 3.105560 | 3.360104 | 0.000000 |  |
|                                                                                                                                  | 1                                                                                                                                                                                                                                                                                                                                                                                                                                                                                                                                                                                                                                                                                                                                                                                                                                                                                                                                                                                                                                                                                                                                                                                                                                                                                                                                                                                                                                                                                                       | 2        | 3        | 4        | 5        |   |   |     |          |  |  |  |  |      |          |          |  |  |  |      |          |          |          |  |  |     |          |          |          |          |  |      |          |          |          |          |          |     |          |          |          |          |          |     |          |          |          |          |          |      |          |          |          |          |          |      |          |          |          |          |          |  |   |   |   |   |  |     |          |  |  |  |  |     |          |          |  |  |  |      |          |          |          |  |  |      |          |          |          |          |  |
| 1 B                                                                                                                              | 0.000000                                                                                                                                                                                                                                                                                                                                                                                                                                                                                                                                                                                                                                                                                                                                                                                                                                                                                                                                                                                                                                                                                                                                                                                                                                                                                                                                                                                                                                                                                                |          |          |          |          |   |   |     |          |  |  |  |  |      |          |          |  |  |  |      |          |          |          |  |  |     |          |          |          |          |  |      |          |          |          |          |          |     |          |          |          |          |          |     |          |          |          |          |          |      |          |          |          |          |          |      |          |          |          |          |          |  |   |   |   |   |  |     |          |  |  |  |  |     |          |          |  |  |  |      |          |          |          |  |  |      |          |          |          |          |  |
| 2 Co                                                                                                                             | 3.490862                                                                                                                                                                                                                                                                                                                                                                                                                                                                                                                                                                                                                                                                                                                                                                                                                                                                                                                                                                                                                                                                                                                                                                                                                                                                                                                                                                                                                                                                                                | 0.000000 |          |          |          |   |   |     |          |  |  |  |  |      |          |          |  |  |  |      |          |          |          |  |  |     |          |          |          |          |  |      |          |          |          |          |          |     |          |          |          |          |          |     |          |          |          |          |          |      |          |          |          |          |          |      |          |          |          |          |          |  |   |   |   |   |  |     |          |  |  |  |  |     |          |          |  |  |  |      |          |          |          |  |  |      |          |          |          |          |  |
| 3 Se                                                                                                                             | 3.125223                                                                                                                                                                                                                                                                                                                                                                                                                                                                                                                                                                                                                                                                                                                                                                                                                                                                                                                                                                                                                                                                                                                                                                                                                                                                                                                                                                                                                                                                                                | 2.378150 | 0.000000 |          |          |   |   |     |          |  |  |  |  |      |          |          |  |  |  |      |          |          |          |  |  |     |          |          |          |          |  |      |          |          |          |          |          |     |          |          |          |          |          |     |          |          |          |          |          |      |          |          |          |          |          |      |          |          |          |          |          |  |   |   |   |   |  |     |          |  |  |  |  |     |          |          |  |  |  |      |          |          |          |  |  |      |          |          |          |          |  |
| 4 B                                                                                                                              | 1.814469                                                                                                                                                                                                                                                                                                                                                                                                                                                                                                                                                                                                                                                                                                                                                                                                                                                                                                                                                                                                                                                                                                                                                                                                                                                                                                                                                                                                                                                                                                | 3.343658 | 3.147255 | 0.000000 |          |   |   |     |          |  |  |  |  |      |          |          |  |  |  |      |          |          |          |  |  |     |          |          |          |          |  |      |          |          |          |          |          |     |          |          |          |          |          |     |          |          |          |          |          |      |          |          |          |          |          |      |          |          |          |          |          |  |   |   |   |   |  |     |          |  |  |  |  |     |          |          |  |  |  |      |          |          |          |  |  |      |          |          |          |          |  |
| 5 B                                                                                                                              | 3.099347                                                                                                                                                                                                                                                                                                                                                                                                                                                                                                                                                                                                                                                                                                                                                                                                                                                                                                                                                                                                                                                                                                                                                                                                                                                                                                                                                                                                                                                                                                | 2.186796 | 2.917423 | 1.842248 | 0.000000 |   |   |     |          |  |  |  |  |      |          |          |  |  |  |      |          |          |          |  |  |     |          |          |          |          |  |      |          |          |          |          |          |     |          |          |          |          |          |     |          |          |          |          |          |      |          |          |          |          |          |      |          |          |          |          |          |  |   |   |   |   |  |     |          |  |  |  |  |     |          |          |  |  |  |      |          |          |          |  |  |      |          |          |          |          |  |
| 6 B                                                                                                                              | 2.928360                                                                                                                                                                                                                                                                                                                                                                                                                                                                                                                                                                                                                                                                                                                                                                                                                                                                                                                                                                                                                                                                                                                                                                                                                                                                                                                                                                                                                                                                                                | 3.069354 | 2.200064 | 1.712334 | 1.748891 |   |   |     |          |  |  |  |  |      |          |          |  |  |  |      |          |          |          |  |  |     |          |          |          |          |  |      |          |          |          |          |          |     |          |          |          |          |          |     |          |          |          |          |          |      |          |          |          |          |          |      |          |          |          |          |          |  |   |   |   |   |  |     |          |  |  |  |  |     |          |          |  |  |  |      |          |          |          |  |  |      |          |          |          |          |  |
| 7 B                                                                                                                              | 1.618953                                                                                                                                                                                                                                                                                                                                                                                                                                                                                                                                                                                                                                                                                                                                                                                                                                                                                                                                                                                                                                                                                                                                                                                                                                                                                                                                                                                                                                                                                                | 3.470087 | 2.114918 | 1.805049 | 2.906511 |   |   |     |          |  |  |  |  |      |          |          |  |  |  |      |          |          |          |  |  |     |          |          |          |          |  |      |          |          |          |          |          |     |          |          |          |          |          |     |          |          |          |          |          |      |          |          |          |          |          |      |          |          |          |          |          |  |   |   |   |   |  |     |          |  |  |  |  |     |          |          |  |  |  |      |          |          |          |  |  |      |          |          |          |          |  |
| 8 Se                                                                                                                             | 1.986842                                                                                                                                                                                                                                                                                                                                                                                                                                                                                                                                                                                                                                                                                                                                                                                                                                                                                                                                                                                                                                                                                                                                                                                                                                                                                                                                                                                                                                                                                                | 2.374563 | 3.453809 | 2.112953 | 2.166065 |   |   |     |          |  |  |  |  |      |          |          |  |  |  |      |          |          |          |  |  |     |          |          |          |          |  |      |          |          |          |          |          |     |          |          |          |          |          |     |          |          |          |          |          |      |          |          |          |          |          |      |          |          |          |          |          |  |   |   |   |   |  |     |          |  |  |  |  |     |          |          |  |  |  |      |          |          |          |  |  |      |          |          |          |          |  |
| 9 B                                                                                                                              | 3.895472                                                                                                                                                                                                                                                                                                                                                                                                                                                                                                                                                                                                                                                                                                                                                                                                                                                                                                                                                                                                                                                                                                                                                                                                                                                                                                                                                                                                                                                                                                | 2.013234 | 2.018019 | 2.980935 | 1.699194 |   |   |     |          |  |  |  |  |      |          |          |  |  |  |      |          |          |          |  |  |     |          |          |          |          |  |      |          |          |          |          |          |     |          |          |          |          |          |     |          |          |          |          |          |      |          |          |          |          |          |      |          |          |          |          |          |  |   |   |   |   |  |     |          |  |  |  |  |     |          |          |  |  |  |      |          |          |          |  |  |      |          |          |          |          |  |
|                                                                                                                                  | 6                                                                                                                                                                                                                                                                                                                                                                                                                                                                                                                                                                                                                                                                                                                                                                                                                                                                                                                                                                                                                                                                                                                                                                                                                                                                                                                                                                                                                                                                                                       | 7        | 8        | 9        |          |   |   |     |          |  |  |  |  |      |          |          |  |  |  |      |          |          |          |  |  |     |          |          |          |          |  |      |          |          |          |          |          |     |          |          |          |          |          |     |          |          |          |          |          |      |          |          |          |          |          |      |          |          |          |          |          |  |   |   |   |   |  |     |          |  |  |  |  |     |          |          |  |  |  |      |          |          |          |  |  |      |          |          |          |          |  |
| 6 B                                                                                                                              | 0.000000                                                                                                                                                                                                                                                                                                                                                                                                                                                                                                                                                                                                                                                                                                                                                                                                                                                                                                                                                                                                                                                                                                                                                                                                                                                                                                                                                                                                                                                                                                |          |          |          |          |   |   |     |          |  |  |  |  |      |          |          |  |  |  |      |          |          |          |  |  |     |          |          |          |          |  |      |          |          |          |          |          |     |          |          |          |          |          |     |          |          |          |          |          |      |          |          |          |          |          |      |          |          |          |          |          |  |   |   |   |   |  |     |          |  |  |  |  |     |          |          |  |  |  |      |          |          |          |  |  |      |          |          |          |          |  |
| 7 B                                                                                                                              | 1.862155                                                                                                                                                                                                                                                                                                                                                                                                                                                                                                                                                                                                                                                                                                                                                                                                                                                                                                                                                                                                                                                                                                                                                                                                                                                                                                                                                                                                                                                                                                | 0.000000 |          |          |          |   |   |     |          |  |  |  |  |      |          |          |  |  |  |      |          |          |          |  |  |     |          |          |          |          |  |      |          |          |          |          |          |     |          |          |          |          |          |     |          |          |          |          |          |      |          |          |          |          |          |      |          |          |          |          |          |  |   |   |   |   |  |     |          |  |  |  |  |     |          |          |  |  |  |      |          |          |          |  |  |      |          |          |          |          |  |
| 8 Se                                                                                                                             | 3.155531                                                                                                                                                                                                                                                                                                                                                                                                                                                                                                                                                                                                                                                                                                                                                                                                                                                                                                                                                                                                                                                                                                                                                                                                                                                                                                                                                                                                                                                                                                | 2.946542 | 0.000000 |          |          |   |   |     |          |  |  |  |  |      |          |          |  |  |  |      |          |          |          |  |  |     |          |          |          |          |  |      |          |          |          |          |          |     |          |          |          |          |          |     |          |          |          |          |          |      |          |          |          |          |          |      |          |          |          |          |          |  |   |   |   |   |  |     |          |  |  |  |  |     |          |          |  |  |  |      |          |          |          |  |  |      |          |          |          |          |  |
| 9 B                                                                                                                              | 1.772218                                                                                                                                                                                                                                                                                                                                                                                                                                                                                                                                                                                                                                                                                                                                                                                                                                                                                                                                                                                                                                                                                                                                                                                                                                                                                                                                                                                                                                                                                                | 3.105560 | 3.360104 | 0.000000 |          |   |   |     |          |  |  |  |  |      |          |          |  |  |  |      |          |          |          |  |  |     |          |          |          |          |  |      |          |          |          |          |          |     |          |          |          |          |          |     |          |          |          |          |          |      |          |          |          |          |          |      |          |          |          |          |          |  |   |   |   |   |  |     |          |  |  |  |  |     |          |          |  |  |  |      |          |          |          |  |  |      |          |          |          |          |  |
|  <p>12. -6531.8511236 +22.6 C<sub>1</sub></p> | <table border="1"> <thead> <tr> <th></th> <th>1</th> <th>2</th> <th>3</th> <th>4</th> <th>5</th> </tr> </thead> <tbody> <tr><td>1 B</td><td>0.000000</td><td></td><td></td><td></td><td></td></tr> <tr><td>2 Se</td><td>2.221494</td><td>0.000000</td><td></td><td></td><td></td></tr> <tr><td>3 Se</td><td>3.207359</td><td>3.343019</td><td>0.000000</td><td></td><td></td></tr> <tr><td>4 B</td><td>2.676438</td><td>2.060375</td><td>2.083384</td><td>0.000000</td><td></td></tr> <tr><td>5 B</td><td>1.781707</td><td>2.033957</td><td>3.290062</td><td>1.719011</td><td>0.000000</td></tr> <tr><td>6 B</td><td>1.878193</td><td>2.123436</td><td>2.949910</td><td>3.076526</td><td>3.112197</td></tr> <tr><td>7 B</td><td>2.996762</td><td>3.075561</td><td>2.026851</td><td>3.160786</td><td>3.898382</td></tr> <tr><td>8 B</td><td>1.781352</td><td>2.921876</td><td>2.205148</td><td>1.878402</td><td>1.672125</td></tr> <tr><td>9 Co</td><td>2.046209</td><td>3.556023</td><td>2.374455</td><td>3.299423</td><td>3.303161</td></tr> <tr> <th></th> <th>6</th> <th>7</th> <th>8</th> <th>9</th> <th></th> </tr> <tr><td>6 B</td><td>0.000000</td><td></td><td></td><td></td><td></td></tr> <tr><td>7 B</td><td>1.624289</td><td>0.000000</td><td></td><td></td><td></td></tr> <tr><td>8 B</td><td>2.924827</td><td>3.163838</td><td>0.000000</td><td></td><td></td></tr> <tr><td>9 Co</td><td>2.124049</td><td>2.085038</td><td>2.072827</td><td>0.000000</td><td></td></tr> </tbody> </table> |          | 1        | 2        | 3        | 4 | 5 | 1 B | 0.000000 |  |  |  |  | 2 Se | 2.221494 | 0.000000 |  |  |  | 3 Se | 3.207359 | 3.343019 | 0.000000 |  |  | 4 B | 2.676438 | 2.060375 | 2.083384 | 0.000000 |  | 5 B  | 1.781707 | 2.033957 | 3.290062 | 1.719011 | 0.000000 | 6 B | 1.878193 | 2.123436 | 2.949910 | 3.076526 | 3.112197 | 7 B | 2.996762 | 3.075561 | 2.026851 | 3.160786 | 3.898382 | 8 B  | 1.781352 | 2.921876 | 2.205148 | 1.878402 | 1.672125 | 9 Co | 2.046209 | 3.556023 | 2.374455 | 3.299423 | 3.303161 |  | 6 | 7 | 8 | 9 |  | 6 B | 0.000000 |  |  |  |  | 7 B | 1.624289 | 0.000000 |  |  |  | 8 B  | 2.924827 | 3.163838 | 0.000000 |  |  | 9 Co | 2.124049 | 2.085038 | 2.072827 | 0.000000 |  |
|                                                                                                                                  | 1                                                                                                                                                                                                                                                                                                                                                                                                                                                                                                                                                                                                                                                                                                                                                                                                                                                                                                                                                                                                                                                                                                                                                                                                                                                                                                                                                                                                                                                                                                       | 2        | 3        | 4        | 5        |   |   |     |          |  |  |  |  |      |          |          |  |  |  |      |          |          |          |  |  |     |          |          |          |          |  |      |          |          |          |          |          |     |          |          |          |          |          |     |          |          |          |          |          |      |          |          |          |          |          |      |          |          |          |          |          |  |   |   |   |   |  |     |          |  |  |  |  |     |          |          |  |  |  |      |          |          |          |  |  |      |          |          |          |          |  |
| 1 B                                                                                                                              | 0.000000                                                                                                                                                                                                                                                                                                                                                                                                                                                                                                                                                                                                                                                                                                                                                                                                                                                                                                                                                                                                                                                                                                                                                                                                                                                                                                                                                                                                                                                                                                |          |          |          |          |   |   |     |          |  |  |  |  |      |          |          |  |  |  |      |          |          |          |  |  |     |          |          |          |          |  |      |          |          |          |          |          |     |          |          |          |          |          |     |          |          |          |          |          |      |          |          |          |          |          |      |          |          |          |          |          |  |   |   |   |   |  |     |          |  |  |  |  |     |          |          |  |  |  |      |          |          |          |  |  |      |          |          |          |          |  |
| 2 Se                                                                                                                             | 2.221494                                                                                                                                                                                                                                                                                                                                                                                                                                                                                                                                                                                                                                                                                                                                                                                                                                                                                                                                                                                                                                                                                                                                                                                                                                                                                                                                                                                                                                                                                                | 0.000000 |          |          |          |   |   |     |          |  |  |  |  |      |          |          |  |  |  |      |          |          |          |  |  |     |          |          |          |          |  |      |          |          |          |          |          |     |          |          |          |          |          |     |          |          |          |          |          |      |          |          |          |          |          |      |          |          |          |          |          |  |   |   |   |   |  |     |          |  |  |  |  |     |          |          |  |  |  |      |          |          |          |  |  |      |          |          |          |          |  |
| 3 Se                                                                                                                             | 3.207359                                                                                                                                                                                                                                                                                                                                                                                                                                                                                                                                                                                                                                                                                                                                                                                                                                                                                                                                                                                                                                                                                                                                                                                                                                                                                                                                                                                                                                                                                                | 3.343019 | 0.000000 |          |          |   |   |     |          |  |  |  |  |      |          |          |  |  |  |      |          |          |          |  |  |     |          |          |          |          |  |      |          |          |          |          |          |     |          |          |          |          |          |     |          |          |          |          |          |      |          |          |          |          |          |      |          |          |          |          |          |  |   |   |   |   |  |     |          |  |  |  |  |     |          |          |  |  |  |      |          |          |          |  |  |      |          |          |          |          |  |
| 4 B                                                                                                                              | 2.676438                                                                                                                                                                                                                                                                                                                                                                                                                                                                                                                                                                                                                                                                                                                                                                                                                                                                                                                                                                                                                                                                                                                                                                                                                                                                                                                                                                                                                                                                                                | 2.060375 | 2.083384 | 0.000000 |          |   |   |     |          |  |  |  |  |      |          |          |  |  |  |      |          |          |          |  |  |     |          |          |          |          |  |      |          |          |          |          |          |     |          |          |          |          |          |     |          |          |          |          |          |      |          |          |          |          |          |      |          |          |          |          |          |  |   |   |   |   |  |     |          |  |  |  |  |     |          |          |  |  |  |      |          |          |          |  |  |      |          |          |          |          |  |
| 5 B                                                                                                                              | 1.781707                                                                                                                                                                                                                                                                                                                                                                                                                                                                                                                                                                                                                                                                                                                                                                                                                                                                                                                                                                                                                                                                                                                                                                                                                                                                                                                                                                                                                                                                                                | 2.033957 | 3.290062 | 1.719011 | 0.000000 |   |   |     |          |  |  |  |  |      |          |          |  |  |  |      |          |          |          |  |  |     |          |          |          |          |  |      |          |          |          |          |          |     |          |          |          |          |          |     |          |          |          |          |          |      |          |          |          |          |          |      |          |          |          |          |          |  |   |   |   |   |  |     |          |  |  |  |  |     |          |          |  |  |  |      |          |          |          |  |  |      |          |          |          |          |  |
| 6 B                                                                                                                              | 1.878193                                                                                                                                                                                                                                                                                                                                                                                                                                                                                                                                                                                                                                                                                                                                                                                                                                                                                                                                                                                                                                                                                                                                                                                                                                                                                                                                                                                                                                                                                                | 2.123436 | 2.949910 | 3.076526 | 3.112197 |   |   |     |          |  |  |  |  |      |          |          |  |  |  |      |          |          |          |  |  |     |          |          |          |          |  |      |          |          |          |          |          |     |          |          |          |          |          |     |          |          |          |          |          |      |          |          |          |          |          |      |          |          |          |          |          |  |   |   |   |   |  |     |          |  |  |  |  |     |          |          |  |  |  |      |          |          |          |  |  |      |          |          |          |          |  |
| 7 B                                                                                                                              | 2.996762                                                                                                                                                                                                                                                                                                                                                                                                                                                                                                                                                                                                                                                                                                                                                                                                                                                                                                                                                                                                                                                                                                                                                                                                                                                                                                                                                                                                                                                                                                | 3.075561 | 2.026851 | 3.160786 | 3.898382 |   |   |     |          |  |  |  |  |      |          |          |  |  |  |      |          |          |          |  |  |     |          |          |          |          |  |      |          |          |          |          |          |     |          |          |          |          |          |     |          |          |          |          |          |      |          |          |          |          |          |      |          |          |          |          |          |  |   |   |   |   |  |     |          |  |  |  |  |     |          |          |  |  |  |      |          |          |          |  |  |      |          |          |          |          |  |
| 8 B                                                                                                                              | 1.781352                                                                                                                                                                                                                                                                                                                                                                                                                                                                                                                                                                                                                                                                                                                                                                                                                                                                                                                                                                                                                                                                                                                                                                                                                                                                                                                                                                                                                                                                                                | 2.921876 | 2.205148 | 1.878402 | 1.672125 |   |   |     |          |  |  |  |  |      |          |          |  |  |  |      |          |          |          |  |  |     |          |          |          |          |  |      |          |          |          |          |          |     |          |          |          |          |          |     |          |          |          |          |          |      |          |          |          |          |          |      |          |          |          |          |          |  |   |   |   |   |  |     |          |  |  |  |  |     |          |          |  |  |  |      |          |          |          |  |  |      |          |          |          |          |  |
| 9 Co                                                                                                                             | 2.046209                                                                                                                                                                                                                                                                                                                                                                                                                                                                                                                                                                                                                                                                                                                                                                                                                                                                                                                                                                                                                                                                                                                                                                                                                                                                                                                                                                                                                                                                                                | 3.556023 | 2.374455 | 3.299423 | 3.303161 |   |   |     |          |  |  |  |  |      |          |          |  |  |  |      |          |          |          |  |  |     |          |          |          |          |  |      |          |          |          |          |          |     |          |          |          |          |          |     |          |          |          |          |          |      |          |          |          |          |          |      |          |          |          |          |          |  |   |   |   |   |  |     |          |  |  |  |  |     |          |          |  |  |  |      |          |          |          |  |  |      |          |          |          |          |  |
|                                                                                                                                  | 6                                                                                                                                                                                                                                                                                                                                                                                                                                                                                                                                                                                                                                                                                                                                                                                                                                                                                                                                                                                                                                                                                                                                                                                                                                                                                                                                                                                                                                                                                                       | 7        | 8        | 9        |          |   |   |     |          |  |  |  |  |      |          |          |  |  |  |      |          |          |          |  |  |     |          |          |          |          |  |      |          |          |          |          |          |     |          |          |          |          |          |     |          |          |          |          |          |      |          |          |          |          |          |      |          |          |          |          |          |  |   |   |   |   |  |     |          |  |  |  |  |     |          |          |  |  |  |      |          |          |          |  |  |      |          |          |          |          |  |
| 6 B                                                                                                                              | 0.000000                                                                                                                                                                                                                                                                                                                                                                                                                                                                                                                                                                                                                                                                                                                                                                                                                                                                                                                                                                                                                                                                                                                                                                                                                                                                                                                                                                                                                                                                                                |          |          |          |          |   |   |     |          |  |  |  |  |      |          |          |  |  |  |      |          |          |          |  |  |     |          |          |          |          |  |      |          |          |          |          |          |     |          |          |          |          |          |     |          |          |          |          |          |      |          |          |          |          |          |      |          |          |          |          |          |  |   |   |   |   |  |     |          |  |  |  |  |     |          |          |  |  |  |      |          |          |          |  |  |      |          |          |          |          |  |
| 7 B                                                                                                                              | 1.624289                                                                                                                                                                                                                                                                                                                                                                                                                                                                                                                                                                                                                                                                                                                                                                                                                                                                                                                                                                                                                                                                                                                                                                                                                                                                                                                                                                                                                                                                                                | 0.000000 |          |          |          |   |   |     |          |  |  |  |  |      |          |          |  |  |  |      |          |          |          |  |  |     |          |          |          |          |  |      |          |          |          |          |          |     |          |          |          |          |          |     |          |          |          |          |          |      |          |          |          |          |          |      |          |          |          |          |          |  |   |   |   |   |  |     |          |  |  |  |  |     |          |          |  |  |  |      |          |          |          |  |  |      |          |          |          |          |  |
| 8 B                                                                                                                              | 2.924827                                                                                                                                                                                                                                                                                                                                                                                                                                                                                                                                                                                                                                                                                                                                                                                                                                                                                                                                                                                                                                                                                                                                                                                                                                                                                                                                                                                                                                                                                                | 3.163838 | 0.000000 |          |          |   |   |     |          |  |  |  |  |      |          |          |  |  |  |      |          |          |          |  |  |     |          |          |          |          |  |      |          |          |          |          |          |     |          |          |          |          |          |     |          |          |          |          |          |      |          |          |          |          |          |      |          |          |          |          |          |  |   |   |   |   |  |     |          |  |  |  |  |     |          |          |  |  |  |      |          |          |          |  |  |      |          |          |          |          |  |
| 9 Co                                                                                                                             | 2.124049                                                                                                                                                                                                                                                                                                                                                                                                                                                                                                                                                                                                                                                                                                                                                                                                                                                                                                                                                                                                                                                                                                                                                                                                                                                                                                                                                                                                                                                                                                | 2.085038 | 2.072827 | 0.000000 |          |   |   |     |          |  |  |  |  |      |          |          |  |  |  |      |          |          |          |  |  |     |          |          |          |          |  |      |          |          |          |          |          |     |          |          |          |          |          |     |          |          |          |          |          |      |          |          |          |          |          |      |          |          |          |          |          |  |   |   |   |   |  |     |          |  |  |  |  |     |          |          |  |  |  |      |          |          |          |  |  |      |          |          |          |          |  |

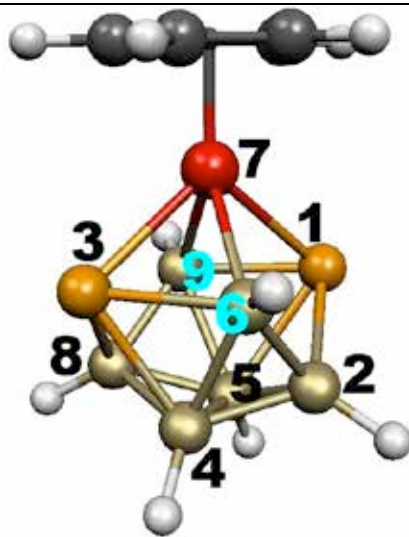

13. -6531.8500740 +23.2 C<sub>2</sub>

|      | 1        | 2        | 3        | 4        | 5        |  |
|------|----------|----------|----------|----------|----------|--|
| 1 Se | 0.000000 |          |          |          |          |  |
| 2 B  | 2.038330 | 0.000000 |          |          |          |  |
| 3 Se | 3.643733 | 3.161303 | 0.000000 |          |          |  |
| 4 B  | 3.101237 | 1.704121 | 2.156302 | 0.000000 |          |  |
| 5 B  | 2.162489 | 1.790354 | 3.106275 | 1.706853 | 0.000000 |  |
| 6 B  | 2.660575 | 1.719564 | 2.028977 | 1.935668 | 2.803733 |  |
| 7 Co | 2.311045 | 3.078189 | 2.310799 | 3.293698 | 3.296135 |  |
| 8 B  | 3.156141 | 2.898955 | 2.040834 | 1.792410 | 1.704399 |  |
| 9 B  | 2.025288 | 2.949094 | 2.690232 | 2.809806 | 1.933028 |  |
|      | 6        | 7        | 8        | 9        |          |  |
| 6 B  | 0.000000 |          |          |          |          |  |
| 7 Co | 2.143803 | 0.000000 |          |          |          |  |
| 8 B  | 2.944688 | 3.060532 | 0.000000 |          |          |  |
| 9 B  | 3.036614 | 2.147860 | 1.719686 | 0.000000 |          |  |

Table S2C. Energy ranking for all of the CpCoSe<sub>2</sub>B<sub>6</sub>H<sub>6</sub> optimized structures after B3LYP/6-31G(d) optimizations:

| No | Initial structure        | Final energy (a.u.) | ΔE (kcal/mol) |
|----|--------------------------|---------------------|---------------|
| 1  | 4-TricTrPrism-Co2Se1Se4  | -6527.6855582       | 0.00          |
| 2  | 1-CapCube-Co2Se2Se1      | -6527.6855566       | 0.00          |
| 3  | 4-TricTrPrism-Co2Se2Se2  | -6527.6855334       | 0.02          |
| 4  | 3-Tl99-Co4Se1Se1         | -6527.6855320       | 0.02          |
| 5  | 3-Tl99-Co3Se6Se2         | -6527.6855292       | 0.02          |
| 6  | 2-PressCapCube-Co2Se1Se4 | -6527.6855284       | 0.02          |
| 7  | 4-TricTrPrism-Co2Se1Se1  | -6527.6855263       | 0.02          |
| 8  | 3-Tl99-Co4Se1Se6         | -6527.6855249       | 0.02          |
| 9  | 3-Tl99-Co3Se1Se5         | -6527.6855221       | 0.02          |
| 10 | 1-CapCube-Co2Se3Se2      | -6527.6855097       | 0.03          |
| 11 | 3-Tl99-Co2Se3Se1         | -6527.6855086       | 0.03          |
| 12 | 3-Tl99-Co3Se1Se4         | -6527.6855027       | 0.03          |
| 13 | 4-TricTrPrism-Co1Se1Se1  | -6527.6855025       | 0.03          |
| 14 | 1-CapCube-Co3Se5Se2      | -6527.6854973       | 0.04          |
| 15 | 3-Tl99-Co4Se2Se1         | -6527.6854904       | 0.04          |
| 16 | 3-Tl99-Co1Se1Se1         | -6527.6854800       | 0.05          |
| 17 | 2-PressCapCube-Co1Se1Se2 | -6527.6854769       | 0.05          |
| 18 | 2-PressCapCube-Co1Se2Se3 | -6527.6766882       | 5.57          |
| 19 | 1-CapCube-Co1Se1Se4      | -6527.6766783       | 5.57          |
| 20 | 3-Tl99-Co1Se1Se3         | -6527.6766680       | 5.58          |
| 21 | 2-PressCapCube-Co3Se2Se4 | -6527.6766586       | 5.58          |
| 22 | 2-PressCapCube-Co5Se1Se4 | -6527.6766576       | 5.59          |
| 23 | 3-Tl99-Co3Se5Se1         | -6527.6766451       | 5.59          |
| 24 | 3-Tl99-Co3Se1Se7         | -6527.6697137       | 9.94          |
| 25 | 3-Tl99-Co3Se4Se3         | -6527.6697081       | 9.95          |
| 26 | 3-Tl99-Co2Se3Se4         | -6527.6696953       | 9.95          |
| 27 | 2-PressCapCube-Co5Se2Se4 | -6527.6696526       | 9.98          |
| 28 | 2-PressCapCube-Co1Se1Se4 | -6527.6696488       | 9.98          |
| 29 | 3-Tl99-Co2Se2Se1         | -6527.6696486       | 9.98          |
| 30 | 2-PressCapCube-Co5Se3Se3 | -6527.6696427       | 9.99          |
| 31 | 2-PressCapCube-Co5Se3Se2 | -6527.6696406       | 9.99          |
| 32 | 3-Tl99-Co2Se3Se2         | -6527.6696298       | 10.00         |
| 33 | 2-PressCapCube-Co2Se2Se4 | -6527.6696246       | 10.00         |
| 34 | 2-PressCapCube-Co2Se2Se3 | -6527.6695952       | 10.02         |
| 35 | 4-TricTrPrism-Co2Se4Se1  | -6527.6695877       | 10.02         |
| 36 | 2-PressCapCube-Co3Se1Se5 | -6527.6693614       | 10.16         |
| 37 | 2-PressCapCube-Co5Se1Se5 | -6527.6693369       | 10.18         |
| 38 | 3-Tl99-Co3Se1Se6         | -6527.6693165       | 10.19         |
| 39 | 3-Tl99-Co2Se1Se3         | -6527.6693032       | 10.20         |
| 40 | 2-PressCapCube-Co2Se1Se1 | -6527.6693030       | 10.20         |

|    |                          |               |       |
|----|--------------------------|---------------|-------|
| 41 | 1-CapCube-Co3Se4Se2      | -6527.6692998 | 10.20 |
| 42 | 1-CapCube-Co1Se1Se2      | -6527.6692956 | 10.21 |
| 43 | 3-Tl99-Co2Se1Se1         | -6527.6692897 | 10.21 |
| 44 | 4-TricTrPrism-Co2Se1Se6  | -6527.6692865 | 10.21 |
| 45 | 1-CapCube-Co2Se2Se3      | -6527.6692820 | 10.21 |
| 46 | 3-Tl99-Co4Se1Se3         | -6527.6692791 | 10.22 |
| 47 | 2-PressCapCube-Co3Se1Se4 | -6527.6692680 | 10.22 |
| 48 | 2-PressCapCube-Co1Se1Se1 | -6527.6692661 | 10.22 |
| 49 | 3-Tl99-Co4Se2Se2         | -6527.6692542 | 10.23 |
| 50 | 2-PressCapCube-Co3Se1Se1 | -6527.6692470 | 10.24 |
| 51 | 1-CapCube-Co2Se1Se4      | -6527.6645957 | 13.15 |
| 52 | 2-PressCapCube-Co2Se5Se1 | -6527.6645544 | 13.18 |
| 53 | 3-Tl99-Co3Se4Se2         | -6527.6645503 | 13.18 |
| 54 | 3-Tl99-Co4Se3Se4         | -6527.6645369 | 13.19 |
| 55 | 2-PressCapCube-Co2Se3Se2 | -6527.6645197 | 13.20 |
| 56 | 1-CapCube-Co2Se2Se4      | -6527.6644466 | 13.25 |
| 57 | 1-CapCube-Co3Se6Se1      | -6527.6584536 | 17.01 |
| 58 | 4-TricTrPrism-Co2Se2Se3  | -6527.6584439 | 17.01 |
| 59 | 4-TricTrPrism-Co2Se2Se4  | -6527.6584411 | 17.02 |
| 60 | 3-Tl99-Co4Se1Se4         | -6527.6584386 | 17.02 |
| 61 | 3-Tl99-Co1Se1Se5         | -6527.6584320 | 17.02 |
| 62 | 2-PressCapCube-Co5Se1Se1 | -6527.6584289 | 17.02 |
| 63 | 2-PressCapCube-Co3Se1Se3 | -6527.6584280 | 17.02 |
| 64 | 2-PressCapCube-Co3Se3Se2 | -6527.6584252 | 17.03 |
| 65 | 3-Tl99-Co1Se2Se1         | -6527.6584198 | 17.03 |
| 66 | 3-Tl99-Co3Se5Se3         | -6527.6584084 | 17.04 |
| 67 | 3-Tl99-Co3Se4Se4         | -6527.6584077 | 17.04 |
| 68 | 2-PressCapCube-Co2Se1Se3 | -6527.6584016 | 17.04 |
| 69 | 3-Tl99-Co1Se1Se6         | -6527.6584000 | 17.04 |
| 70 | 1-CapCube-Co2Se3Se1      | -6527.6583974 | 17.04 |
| 71 | 2-PressCapCube-Co3Se6Se1 | -6527.6583945 | 17.05 |
| 72 | 3-Tl99-Co2Se1Se4         | -6527.6583883 | 17.05 |
| 73 | 2-PressCapCube-Co2Se6Se1 | -6527.6583866 | 17.05 |
| 74 | 3-Tl99-Co4Se1Se7         | -6527.6583822 | 17.05 |
| 75 | 4-TricTrPrism-Co1Se2Se1  | -6527.6583808 | 17.05 |
| 76 | 1-CapCube-Co3Se1Se5      | -6527.6583769 | 17.06 |
| 77 | 3-Tl99-Co4Se2Se4         | -6527.6583748 | 17.06 |
| 78 | 1-CapCube-Co2Se6Se1      | -6527.6583737 | 17.06 |
| 79 | 4-TricTrPrism-Co1Se1Se6  | -6527.6583350 | 17.08 |
| 80 | 4-TricTrPrism-Co2Se1Se7  | -6527.6583213 | 17.09 |
| 81 | 4-TricTrPrism-Co2Se2Se1  | -6527.6560102 | 18.54 |
| 82 | 3-Tl99-Co3Se6Se1         | -6527.6560027 | 18.55 |
| 83 | 4-TricTrPrism-Co2Se1Se2  | -6527.6559830 | 18.56 |

|     |                          |               |       |
|-----|--------------------------|---------------|-------|
| 84  | 3-Tl99-Co3Se3Se1         | -6527.6538238 | 19.91 |
| 85  | 4-TricTrPrism-Co1Se1Se4  | -6527.6538052 | 19.93 |
| 86  | 3-Tl99-Co3Se3Se2         | -6527.6537826 | 19.94 |
| 87  | 4-TricTrPrism-Co2Se2Se6  | -6527.6537825 | 19.94 |
| 88  | 3-Tl99-Co4Se2Se5         | -6527.6526685 | 20.64 |
| 89  | 3-Tl99-Co3Se1Se2         | -6527.6526343 | 20.66 |
| 90  | 2-PressCapCube-Co2Se5Se2 | -6527.6521473 | 20.97 |
| 91  | 3-Tl99-Co3Se7Se1         | -6527.6521388 | 20.97 |
| 92  | 4-TricTrPrism-Co1Se1Se2  | -6527.6521242 | 20.98 |
| 93  | 2-PressCapCube-Co1Se3Se2 | -6527.6521240 | 20.98 |
| 94  | 3-Tl99-Co2Se1Se2         | -6527.6502811 | 22.14 |
| 95  | 3-Tl99-Co3Se3Se3         | -6527.6502506 | 22.16 |
| 96  | 2-PressCapCube-Co1Se4Se1 | -6527.6502463 | 22.16 |
| 97  | 1-CapCube-Co1Se2Se2      | -6527.6502443 | 22.16 |
| 98  | 4-TricTrPrism-Co1Se2Se2  | -6527.6502382 | 22.16 |
| 99  | 4-TricTrPrism-Co2Se3Se1  | -6527.6502327 | 22.17 |
| 100 | 3-Tl99-Co4Se4Se1         | -6527.6502249 | 22.17 |
| 101 | 3-Tl99-Co1Se2Se2         | -6527.6502038 | 22.19 |
| 102 | 4-TricTrPrism-Co1Se3Se1  | -6527.6501993 | 22.19 |
| 103 | 3-Tl99-Co3Se2Se3         | -6527.6501977 | 22.19 |
| 104 | 2-PressCapCube-Co1Se2Se2 | -6527.6501693 | 22.21 |
| 105 | 2-PressCapCube-Co5Se4Se2 | -6527.6500113 | 22.31 |
| 106 | 4-TricTrPrism-Co2Se2Se5  | -6527.6499978 | 22.31 |
| 107 | 3-Tl99-Co2Se3Se5         | -6527.6499300 | 22.36 |
| 108 | 2-PressCapCube-Co1Se3Se3 | -6527.6477364 | 23.73 |
| 109 | 1-CapCube-Co2Se2Se2      | -6527.6477106 | 23.75 |
| 110 | 2-PressCapCube-Co2Se5Se3 | -6527.6477002 | 23.76 |
| 111 | 3-Tl99-Co2Se2Se2         | -6527.6476579 | 23.78 |
| 112 | 1-CapCube-Co3Se4Se1      | -6527.6462079 | 24.69 |
| 113 | 1-CapCube-Co3Se3Se3      | -6527.6462001 | 24.70 |
| 114 | 3-Tl99-Co3Se2Se5         | -6527.6461524 | 24.73 |
| 115 | 1-CapCube-Co3Se2Se3      | -6527.6408850 | 28.03 |
| 116 | 1-CapCube-Co3Se2Se1      | -6527.6408459 | 28.06 |
| 117 | 2-PressCapCube-Co5Se1Se2 | -6527.6408339 | 28.07 |
| 118 | 3-Tl99-Co1Se3Se1         | -6527.6408335 | 28.07 |
| 119 | 2-PressCapCube-Co3Se3Se1 | -6527.6408236 | 28.07 |
| 120 | 3-Tl99-Co4Se3Se3         | -6527.6408151 | 28.08 |
| 121 | 2-PressCapCube-Co3Se1Se2 | -6527.6408131 | 28.08 |
| 122 | 3-Tl99-Co1Se1Se7         | -6527.6408000 | 28.09 |
| 123 | 1-CapCube-Co3Se1Se2      | -6527.6407985 | 28.09 |
| 124 | 3-Tl99-Co2Se2Se3         | -6527.6407965 | 28.09 |
| 125 | 3-Tl99-Co1Se3Se2         | -6527.6407781 | 28.10 |
| 126 | 2-PressCapCube-Co5Se1Se3 | -6527.6379805 | 29.86 |

|     |                          |               |       |
|-----|--------------------------|---------------|-------|
| 127 | 3-Tl99-Co2Se4Se4         | -6527.6378719 | 29.92 |
| 128 | 2-PressCapCube-Co5Se2Se3 | -6527.6378549 | 29.93 |
| 129 | 2-PressCapCube-Co2Se4Se1 | -6527.6378539 | 29.94 |
| 130 | 2-PressCapCube-Co3Se5Se2 | -6527.6373994 | 30.22 |
| 131 | 2-PressCapCube-Co5Se6Se1 | -6527.6373154 | 30.27 |
| 132 | 1-CapCube-Co2Se5Se2      | -6527.6373082 | 30.28 |
| 133 | 4-TricTrPrism-Co2Se3Se2  | -6527.6317820 | 33.75 |
| 134 | 3-Tl99-Co1Se2Se3         | -6527.6317733 | 33.75 |
| 135 | 1-CapCube-Co2Se1Se2      | -6527.6317712 | 33.75 |
| 136 | 2-PressCapCube-Co2Se4Se2 | -6527.6317700 | 33.75 |
| 137 | 2-PressCapCube-Co3Se3Se3 | -6527.6317685 | 33.75 |
| 138 | 1-CapCube-Co2Se1Se5      | -6527.6317659 | 33.76 |
| 139 | 2-PressCapCube-Co3Se4Se1 | -6527.6317286 | 33.78 |
| 140 | 3-Tl99-Co2Se4Se3         | -6527.6317152 | 33.79 |
| 141 | 3-Tl99-Co2Se5Se2         | -6527.6317015 | 33.80 |
| 142 | 3-Tl99-Co2Se3Se3         | -6527.6309416 | 34.27 |
| 143 | 1-CapCube-Co3Se5Se3      | -6527.6308896 | 34.31 |
| 144 | 1-CapCube-Co2Se5Se3      | -6527.6308721 | 34.32 |
| 145 | 2-PressCapCube-Co5Se5Se2 | -6527.6308480 | 34.33 |
| 146 | 2-PressCapCube-Co3Se2Se3 | -6527.6308463 | 34.33 |
| 147 | 3-Tl99-Co2Se5Se1         | -6527.6308463 | 34.33 |
| 148 | 3-Tl99-Co4Se3Se2         | -6527.6308393 | 34.34 |
| 149 | 3-Tl99-Co4Se2Se3         | -6527.6308268 | 34.35 |
| 150 | 3-Tl99-Co3Se2Se2         | -6527.6308108 | 34.36 |
| 151 | 1-CapCube-Co2Se1Se3      | -6527.6308018 | 34.36 |
| 152 | 2-PressCapCube-Co2Se1Se2 | -6527.6307974 | 34.36 |
| 153 | 2-PressCapCube-Co1Se1Se5 | -6527.6305905 | 34.49 |
| 154 | 3-Tl99-Co2Se4Se2         | -6527.6305616 | 34.51 |
| 155 | 3-Tl99-Co3Se1Se3         | -6527.6305213 | 34.54 |
| 156 | 1-CapCube-Co1Se1Se5      | -6527.6305192 | 34.54 |
| 157 | 3-Tl99-Co1Se1Se4         | -6527.6305048 | 34.55 |
| 158 | 2-PressCapCube-Co3Se4Se2 | -6527.6277576 | 36.27 |
| 159 | 3-Tl99-Co1Se1Se2         | -6527.6256741 | 37.58 |
| 160 | 3-Tl99-Co4Se1Se5         | -6527.6247884 | 38.13 |
| 161 | 4-TricTrPrism-Co1Se1Se5  | -6527.6243131 | 38.43 |
| 162 | 3-Tl99-Co3Se4Se1         | -6527.6242980 | 38.44 |
| 163 | 1-CapCube-Co3Se2Se4      | -6527.6242537 | 38.47 |
| 164 | 4-TricTrPrism-Co2Se1Se5  | -6527.6234649 | 38.96 |
| 165 | 3-Tl99-Co2Se4Se1         | -6527.6219176 | 39.94 |
| 166 | 2-PressCapCube-Co5Se4Se1 | -6527.6218953 | 39.95 |
| 167 | 3-Tl99-Co3Se2Se1         | -6527.6218609 | 39.97 |
| 168 | 4-TricTrPrism-Co1Se1Se3  | -6527.6206165 | 40.75 |
| 169 | 1-CapCube-Co1Se1Se3      | -6527.6205723 | 40.78 |

|     |                          |               |       |
|-----|--------------------------|---------------|-------|
| 170 | 1-CapCube-Co3Se1Se4      | -6527.6205502 | 40.79 |
| 171 | 3-Tl99-Co4Se2Se6         | -6527.6169949 | 43.02 |
| 172 | 2-PressCapCube-Co3Se5Se1 | -6527.6169767 | 43.04 |
| 173 | 3-Tl99-Co3Se5Se2         | -6527.6169340 | 43.06 |
| 174 | 1-CapCube-Co3Se1Se1      | -6527.6110521 | 46.75 |
| 175 | 1-CapCube-Co3Se2Se2      | -6527.6105191 | 47.09 |
| 176 | 4-TricTrPrism-Co2Se1Se3  | -6527.6105017 | 47.10 |
| 177 | 1-CapCube-Co2Se4Se2      | -6527.6104771 | 47.11 |
| 178 | 3-Tl99-Co3Se1Se1         | -6527.6103934 | 47.17 |
| 179 | 2-PressCapCube-Co2Se3Se3 | -6527.6101569 | 47.32 |
| 180 | 2-PressCapCube-Co1Se2Se1 | -6527.6101431 | 47.32 |
| 181 | 3-Tl99-Co4Se3Se1         | -6527.6101270 | 47.33 |
| 182 | 3-Tl99-Co4Se1Se2         | -6527.6101191 | 47.34 |
| 183 | 3-Tl99-Co3Se2Se6         | -6527.6101166 | 47.34 |
| 184 | 2-PressCapCube-Co5Se3Se1 | -6527.6101129 | 47.34 |
| 185 | 2-PressCapCube-Co2Se1Se5 | -6527.6091573 | 47.94 |
| 186 | 1-CapCube-Co2Se5Se1      | -6527.6091158 | 47.97 |
| 187 | 1-CapCube-Co2Se3Se3      | -6527.6091113 | 47.97 |
| 188 | 2-PressCapCube-Co3Se2Se2 | -6527.6084827 | 48.37 |
| 189 | 2-PressCapCube-Co2Se2Se1 | -6527.6084654 | 48.38 |
| 190 | 3-Tl99-Co3Se3Se4         | -6527.6078973 | 48.73 |
| 191 | 2-PressCapCube-Co5Se2Se2 | -6527.6048150 | 50.67 |
| 192 | 1-CapCube-Co3Se3Se2      | -6527.6047998 | 50.68 |
| 193 | 3-Tl99-Co4Se3Se5         | -6527.6047810 | 50.69 |
| 194 | 4-TricTrPrism-Co1Se2Se3  | -6527.6042013 | 51.05 |
| 195 | 2-PressCapCube-Co1Se1Se3 | -6527.5986658 | 54.53 |
| 196 | 2-PressCapCube-Co5Se5Se3 | -6527.5982100 | 54.81 |
| 197 | 2-PressCapCube-Co3Se2Se1 | -6527.5949432 | 56.86 |
| 198 | 1-CapCube-Co1Se2Se1      | -6527.5925145 | 58.39 |
| 199 | 3-Tl99-Co3Se2Se4         | -6527.5912182 | 59.20 |
| 200 | 3-Tl99-Co3Se3Se5         | -6527.5903055 | 59.77 |
| 201 | 2-PressCapCube-Co5Se5Se1 | -6527.5859944 | 62.48 |
| 202 | 2-PressCapCube-Co5Se2Se1 | -6527.5849297 | 63.15 |
| 203 | 1-CapCube-Co3Se1Se3      | -6527.5807163 | 65.79 |
| 204 | 1-CapCube-Co2Se4Se1      | -6527.5804661 | 65.95 |
| 205 | 1-CapCube-Co3Se5Se1      | -6527.5750686 | 69.33 |
| 206 | 2-PressCapCube-Co2Se3Se1 | -6527.5734883 | 70.33 |
| 207 | 1-CapCube-Co2Se1Se1      | -6527.5715873 | 71.52 |
| 208 | 2-PressCapCube-Co2Se2Se2 | -6527.5715785 | 71.52 |
| 209 | 1-CapCube-Co3Se3Se1      | -6527.5651320 | 75.57 |
| 210 | 3-Tl99-Co2Se5Se3         | -6527.5645090 | 75.96 |
| 211 | 2-PressCapCube-Co1Se3Se1 | -6527.5621454 | 77.44 |
| 212 | 2-PressCapCube-Co3Se5Se3 | -6527.5471031 | 86.88 |



Table S3A. Initial CpCoSe<sub>2</sub>B<sub>7</sub>H<sub>7</sub> structures, 317 structures.

|                                                                                                                                                            |                                                                                                                                                              |
|------------------------------------------------------------------------------------------------------------------------------------------------------------|--------------------------------------------------------------------------------------------------------------------------------------------------------------|
| <p><b>Initial structures</b></p>                                                                                                                           |  <p>1. Tetracapped trigonal prism (<math>C_{2v}</math>) 98 structures</p> |
|  <p>2. Tetracapped trigonal prism (<math>C_{3v}</math>) 84 structures</p> |  <p>3. Bicapped cube 31 structures</p>                                    |
|  <p>4. Bicapped square antiprism 32 structures</p>                       |  <p>5. Isocloso structure 72 structures</p>                              |

Table 3B. Distance table for the lowest-lying CpCoSe<sub>2</sub>B<sub>7</sub>H<sub>7</sub> structures after M06L/6-311G(d,p) optimization. Included are the ZPcorrected E (a.u.), relative energy (kcal/mol) and symmetry. For clarity only the atoms forming the cluster framework are presented.

| 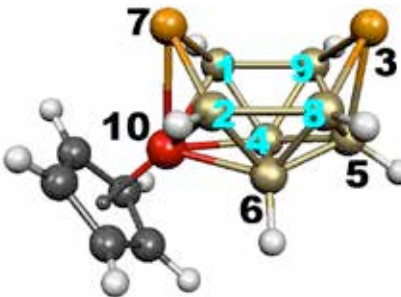 <p>1. -6557.3506350 0.0 C<sub>s</sub></p>   | <table border="1"> <thead> <tr> <th></th> <th>1</th> <th>2</th> <th>3</th> <th>4</th> <th>5</th> </tr> </thead> <tbody> <tr><td>1 B</td><td>0.000000</td><td></td><td></td><td></td><td></td></tr> <tr><td>2 B</td><td>2.875427</td><td>0.000000</td><td></td><td></td><td></td></tr> <tr><td>3 Se</td><td>3.263064</td><td>3.263040</td><td>0.000000</td><td></td><td></td></tr> <tr><td>4 B</td><td>1.755998</td><td>2.876564</td><td>3.144643</td><td>0.000000</td><td></td></tr> <tr><td>5 B</td><td>2.990977</td><td>2.990939</td><td>2.078342</td><td>1.767014</td><td>0.000000</td></tr> <tr><td>6 B</td><td>2.876586</td><td>1.756012</td><td>3.144644</td><td>1.805342</td><td>1.766981</td></tr> <tr><td>7 Se</td><td>1.989424</td><td>1.989431</td><td>3.548465</td><td>3.178129</td><td>3.865066</td></tr> <tr><td>8 B</td><td>3.416059</td><td>1.850864</td><td>1.988454</td><td>2.853799</td><td>1.837521</td></tr> <tr><td>9 B</td><td>1.850936</td><td>3.416075</td><td>1.988450</td><td>1.722904</td><td>1.837528</td></tr> <tr><td>10 Co</td><td>2.095397</td><td>2.095388</td><td>4.300400</td><td>2.083850</td><td>3.350561</td></tr> <tr> <th></th> <th>6</th> <th>7</th> <th>8</th> <th>9</th> <th>10</th> </tr> <tr><td>6 B</td><td>0.000000</td><td></td><td></td><td></td><td></td></tr> <tr><td>7 Se</td><td>3.178153</td><td>0.000000</td><td></td><td></td><td></td></tr> <tr><td>8 B</td><td>1.722898</td><td>3.224707</td><td>0.000000</td><td></td><td></td></tr> <tr><td>9 B</td><td>2.853810</td><td>3.224757</td><td>2.866943</td><td>0.000000</td><td></td></tr> <tr><td>10 Co</td><td>2.083856</td><td>2.325595</td><td>3.346155</td><td>3.346202</td><td>0.000000</td></tr> </tbody> </table> |          | 1        | 2        | 3        | 4 | 5 | 1 B  | 0.000000 |  |  |  |  | 2 B | 2.875427 | 0.000000 |  |  |  | 3 Se | 3.263064 | 3.263040 | 0.000000 |  |  | 4 B | 1.755998 | 2.876564 | 3.144643 | 0.000000 |  | 5 B | 2.990977 | 2.990939 | 2.078342 | 1.767014 | 0.000000 | 6 B | 2.876586 | 1.756012 | 3.144644 | 1.805342 | 1.766981 | 7 Se | 1.989424 | 1.989431 | 3.548465 | 3.178129 | 3.865066 | 8 B | 3.416059 | 1.850864 | 1.988454 | 2.853799 | 1.837521 | 9 B  | 1.850936 | 3.416075 | 1.988450 | 1.722904 | 1.837528 | 10 Co | 2.095397 | 2.095388 | 4.300400 | 2.083850 | 3.350561 |  | 6 | 7 | 8 | 9 | 10 | 6 B | 0.000000 |  |  |  |  | 7 Se | 3.178153 | 0.000000 |  |  |  | 8 B | 1.722898 | 3.224707 | 0.000000 |  |  | 9 B  | 2.853810 | 3.224757 | 2.866943 | 0.000000 |  | 10 Co | 2.083856 | 2.325595 | 3.346155 | 3.346202 | 0.000000 |
|-------------------------------------------------------------------------------------------------------------------------------|------------------------------------------------------------------------------------------------------------------------------------------------------------------------------------------------------------------------------------------------------------------------------------------------------------------------------------------------------------------------------------------------------------------------------------------------------------------------------------------------------------------------------------------------------------------------------------------------------------------------------------------------------------------------------------------------------------------------------------------------------------------------------------------------------------------------------------------------------------------------------------------------------------------------------------------------------------------------------------------------------------------------------------------------------------------------------------------------------------------------------------------------------------------------------------------------------------------------------------------------------------------------------------------------------------------------------------------------------------------------------------------------------------------------------------------------------------------------------------------------------------------------------------------------------------------------------------------------------------------------------------------------------------------------------------------------------------------------------------|----------|----------|----------|----------|---|---|------|----------|--|--|--|--|-----|----------|----------|--|--|--|------|----------|----------|----------|--|--|-----|----------|----------|----------|----------|--|-----|----------|----------|----------|----------|----------|-----|----------|----------|----------|----------|----------|------|----------|----------|----------|----------|----------|-----|----------|----------|----------|----------|----------|------|----------|----------|----------|----------|----------|-------|----------|----------|----------|----------|----------|--|---|---|---|---|----|-----|----------|--|--|--|--|------|----------|----------|--|--|--|-----|----------|----------|----------|--|--|------|----------|----------|----------|----------|--|-------|----------|----------|----------|----------|----------|
|                                                                                                                               | 1                                                                                                                                                                                                                                                                                                                                                                                                                                                                                                                                                                                                                                                                                                                                                                                                                                                                                                                                                                                                                                                                                                                                                                                                                                                                                                                                                                                                                                                                                                                                                                                                                                                                                                                                  | 2        | 3        | 4        | 5        |   |   |      |          |  |  |  |  |     |          |          |  |  |  |      |          |          |          |  |  |     |          |          |          |          |  |     |          |          |          |          |          |     |          |          |          |          |          |      |          |          |          |          |          |     |          |          |          |          |          |      |          |          |          |          |          |       |          |          |          |          |          |  |   |   |   |   |    |     |          |  |  |  |  |      |          |          |  |  |  |     |          |          |          |  |  |      |          |          |          |          |  |       |          |          |          |          |          |
| 1 B                                                                                                                           | 0.000000                                                                                                                                                                                                                                                                                                                                                                                                                                                                                                                                                                                                                                                                                                                                                                                                                                                                                                                                                                                                                                                                                                                                                                                                                                                                                                                                                                                                                                                                                                                                                                                                                                                                                                                           |          |          |          |          |   |   |      |          |  |  |  |  |     |          |          |  |  |  |      |          |          |          |  |  |     |          |          |          |          |  |     |          |          |          |          |          |     |          |          |          |          |          |      |          |          |          |          |          |     |          |          |          |          |          |      |          |          |          |          |          |       |          |          |          |          |          |  |   |   |   |   |    |     |          |  |  |  |  |      |          |          |  |  |  |     |          |          |          |  |  |      |          |          |          |          |  |       |          |          |          |          |          |
| 2 B                                                                                                                           | 2.875427                                                                                                                                                                                                                                                                                                                                                                                                                                                                                                                                                                                                                                                                                                                                                                                                                                                                                                                                                                                                                                                                                                                                                                                                                                                                                                                                                                                                                                                                                                                                                                                                                                                                                                                           | 0.000000 |          |          |          |   |   |      |          |  |  |  |  |     |          |          |  |  |  |      |          |          |          |  |  |     |          |          |          |          |  |     |          |          |          |          |          |     |          |          |          |          |          |      |          |          |          |          |          |     |          |          |          |          |          |      |          |          |          |          |          |       |          |          |          |          |          |  |   |   |   |   |    |     |          |  |  |  |  |      |          |          |  |  |  |     |          |          |          |  |  |      |          |          |          |          |  |       |          |          |          |          |          |
| 3 Se                                                                                                                          | 3.263064                                                                                                                                                                                                                                                                                                                                                                                                                                                                                                                                                                                                                                                                                                                                                                                                                                                                                                                                                                                                                                                                                                                                                                                                                                                                                                                                                                                                                                                                                                                                                                                                                                                                                                                           | 3.263040 | 0.000000 |          |          |   |   |      |          |  |  |  |  |     |          |          |  |  |  |      |          |          |          |  |  |     |          |          |          |          |  |     |          |          |          |          |          |     |          |          |          |          |          |      |          |          |          |          |          |     |          |          |          |          |          |      |          |          |          |          |          |       |          |          |          |          |          |  |   |   |   |   |    |     |          |  |  |  |  |      |          |          |  |  |  |     |          |          |          |  |  |      |          |          |          |          |  |       |          |          |          |          |          |
| 4 B                                                                                                                           | 1.755998                                                                                                                                                                                                                                                                                                                                                                                                                                                                                                                                                                                                                                                                                                                                                                                                                                                                                                                                                                                                                                                                                                                                                                                                                                                                                                                                                                                                                                                                                                                                                                                                                                                                                                                           | 2.876564 | 3.144643 | 0.000000 |          |   |   |      |          |  |  |  |  |     |          |          |  |  |  |      |          |          |          |  |  |     |          |          |          |          |  |     |          |          |          |          |          |     |          |          |          |          |          |      |          |          |          |          |          |     |          |          |          |          |          |      |          |          |          |          |          |       |          |          |          |          |          |  |   |   |   |   |    |     |          |  |  |  |  |      |          |          |  |  |  |     |          |          |          |  |  |      |          |          |          |          |  |       |          |          |          |          |          |
| 5 B                                                                                                                           | 2.990977                                                                                                                                                                                                                                                                                                                                                                                                                                                                                                                                                                                                                                                                                                                                                                                                                                                                                                                                                                                                                                                                                                                                                                                                                                                                                                                                                                                                                                                                                                                                                                                                                                                                                                                           | 2.990939 | 2.078342 | 1.767014 | 0.000000 |   |   |      |          |  |  |  |  |     |          |          |  |  |  |      |          |          |          |  |  |     |          |          |          |          |  |     |          |          |          |          |          |     |          |          |          |          |          |      |          |          |          |          |          |     |          |          |          |          |          |      |          |          |          |          |          |       |          |          |          |          |          |  |   |   |   |   |    |     |          |  |  |  |  |      |          |          |  |  |  |     |          |          |          |  |  |      |          |          |          |          |  |       |          |          |          |          |          |
| 6 B                                                                                                                           | 2.876586                                                                                                                                                                                                                                                                                                                                                                                                                                                                                                                                                                                                                                                                                                                                                                                                                                                                                                                                                                                                                                                                                                                                                                                                                                                                                                                                                                                                                                                                                                                                                                                                                                                                                                                           | 1.756012 | 3.144644 | 1.805342 | 1.766981 |   |   |      |          |  |  |  |  |     |          |          |  |  |  |      |          |          |          |  |  |     |          |          |          |          |  |     |          |          |          |          |          |     |          |          |          |          |          |      |          |          |          |          |          |     |          |          |          |          |          |      |          |          |          |          |          |       |          |          |          |          |          |  |   |   |   |   |    |     |          |  |  |  |  |      |          |          |  |  |  |     |          |          |          |  |  |      |          |          |          |          |  |       |          |          |          |          |          |
| 7 Se                                                                                                                          | 1.989424                                                                                                                                                                                                                                                                                                                                                                                                                                                                                                                                                                                                                                                                                                                                                                                                                                                                                                                                                                                                                                                                                                                                                                                                                                                                                                                                                                                                                                                                                                                                                                                                                                                                                                                           | 1.989431 | 3.548465 | 3.178129 | 3.865066 |   |   |      |          |  |  |  |  |     |          |          |  |  |  |      |          |          |          |  |  |     |          |          |          |          |  |     |          |          |          |          |          |     |          |          |          |          |          |      |          |          |          |          |          |     |          |          |          |          |          |      |          |          |          |          |          |       |          |          |          |          |          |  |   |   |   |   |    |     |          |  |  |  |  |      |          |          |  |  |  |     |          |          |          |  |  |      |          |          |          |          |  |       |          |          |          |          |          |
| 8 B                                                                                                                           | 3.416059                                                                                                                                                                                                                                                                                                                                                                                                                                                                                                                                                                                                                                                                                                                                                                                                                                                                                                                                                                                                                                                                                                                                                                                                                                                                                                                                                                                                                                                                                                                                                                                                                                                                                                                           | 1.850864 | 1.988454 | 2.853799 | 1.837521 |   |   |      |          |  |  |  |  |     |          |          |  |  |  |      |          |          |          |  |  |     |          |          |          |          |  |     |          |          |          |          |          |     |          |          |          |          |          |      |          |          |          |          |          |     |          |          |          |          |          |      |          |          |          |          |          |       |          |          |          |          |          |  |   |   |   |   |    |     |          |  |  |  |  |      |          |          |  |  |  |     |          |          |          |  |  |      |          |          |          |          |  |       |          |          |          |          |          |
| 9 B                                                                                                                           | 1.850936                                                                                                                                                                                                                                                                                                                                                                                                                                                                                                                                                                                                                                                                                                                                                                                                                                                                                                                                                                                                                                                                                                                                                                                                                                                                                                                                                                                                                                                                                                                                                                                                                                                                                                                           | 3.416075 | 1.988450 | 1.722904 | 1.837528 |   |   |      |          |  |  |  |  |     |          |          |  |  |  |      |          |          |          |  |  |     |          |          |          |          |  |     |          |          |          |          |          |     |          |          |          |          |          |      |          |          |          |          |          |     |          |          |          |          |          |      |          |          |          |          |          |       |          |          |          |          |          |  |   |   |   |   |    |     |          |  |  |  |  |      |          |          |  |  |  |     |          |          |          |  |  |      |          |          |          |          |  |       |          |          |          |          |          |
| 10 Co                                                                                                                         | 2.095397                                                                                                                                                                                                                                                                                                                                                                                                                                                                                                                                                                                                                                                                                                                                                                                                                                                                                                                                                                                                                                                                                                                                                                                                                                                                                                                                                                                                                                                                                                                                                                                                                                                                                                                           | 2.095388 | 4.300400 | 2.083850 | 3.350561 |   |   |      |          |  |  |  |  |     |          |          |  |  |  |      |          |          |          |  |  |     |          |          |          |          |  |     |          |          |          |          |          |     |          |          |          |          |          |      |          |          |          |          |          |     |          |          |          |          |          |      |          |          |          |          |          |       |          |          |          |          |          |  |   |   |   |   |    |     |          |  |  |  |  |      |          |          |  |  |  |     |          |          |          |  |  |      |          |          |          |          |  |       |          |          |          |          |          |
|                                                                                                                               | 6                                                                                                                                                                                                                                                                                                                                                                                                                                                                                                                                                                                                                                                                                                                                                                                                                                                                                                                                                                                                                                                                                                                                                                                                                                                                                                                                                                                                                                                                                                                                                                                                                                                                                                                                  | 7        | 8        | 9        | 10       |   |   |      |          |  |  |  |  |     |          |          |  |  |  |      |          |          |          |  |  |     |          |          |          |          |  |     |          |          |          |          |          |     |          |          |          |          |          |      |          |          |          |          |          |     |          |          |          |          |          |      |          |          |          |          |          |       |          |          |          |          |          |  |   |   |   |   |    |     |          |  |  |  |  |      |          |          |  |  |  |     |          |          |          |  |  |      |          |          |          |          |  |       |          |          |          |          |          |
| 6 B                                                                                                                           | 0.000000                                                                                                                                                                                                                                                                                                                                                                                                                                                                                                                                                                                                                                                                                                                                                                                                                                                                                                                                                                                                                                                                                                                                                                                                                                                                                                                                                                                                                                                                                                                                                                                                                                                                                                                           |          |          |          |          |   |   |      |          |  |  |  |  |     |          |          |  |  |  |      |          |          |          |  |  |     |          |          |          |          |  |     |          |          |          |          |          |     |          |          |          |          |          |      |          |          |          |          |          |     |          |          |          |          |          |      |          |          |          |          |          |       |          |          |          |          |          |  |   |   |   |   |    |     |          |  |  |  |  |      |          |          |  |  |  |     |          |          |          |  |  |      |          |          |          |          |  |       |          |          |          |          |          |
| 7 Se                                                                                                                          | 3.178153                                                                                                                                                                                                                                                                                                                                                                                                                                                                                                                                                                                                                                                                                                                                                                                                                                                                                                                                                                                                                                                                                                                                                                                                                                                                                                                                                                                                                                                                                                                                                                                                                                                                                                                           | 0.000000 |          |          |          |   |   |      |          |  |  |  |  |     |          |          |  |  |  |      |          |          |          |  |  |     |          |          |          |          |  |     |          |          |          |          |          |     |          |          |          |          |          |      |          |          |          |          |          |     |          |          |          |          |          |      |          |          |          |          |          |       |          |          |          |          |          |  |   |   |   |   |    |     |          |  |  |  |  |      |          |          |  |  |  |     |          |          |          |  |  |      |          |          |          |          |  |       |          |          |          |          |          |
| 8 B                                                                                                                           | 1.722898                                                                                                                                                                                                                                                                                                                                                                                                                                                                                                                                                                                                                                                                                                                                                                                                                                                                                                                                                                                                                                                                                                                                                                                                                                                                                                                                                                                                                                                                                                                                                                                                                                                                                                                           | 3.224707 | 0.000000 |          |          |   |   |      |          |  |  |  |  |     |          |          |  |  |  |      |          |          |          |  |  |     |          |          |          |          |  |     |          |          |          |          |          |     |          |          |          |          |          |      |          |          |          |          |          |     |          |          |          |          |          |      |          |          |          |          |          |       |          |          |          |          |          |  |   |   |   |   |    |     |          |  |  |  |  |      |          |          |  |  |  |     |          |          |          |  |  |      |          |          |          |          |  |       |          |          |          |          |          |
| 9 B                                                                                                                           | 2.853810                                                                                                                                                                                                                                                                                                                                                                                                                                                                                                                                                                                                                                                                                                                                                                                                                                                                                                                                                                                                                                                                                                                                                                                                                                                                                                                                                                                                                                                                                                                                                                                                                                                                                                                           | 3.224757 | 2.866943 | 0.000000 |          |   |   |      |          |  |  |  |  |     |          |          |  |  |  |      |          |          |          |  |  |     |          |          |          |          |  |     |          |          |          |          |          |     |          |          |          |          |          |      |          |          |          |          |          |     |          |          |          |          |          |      |          |          |          |          |          |       |          |          |          |          |          |  |   |   |   |   |    |     |          |  |  |  |  |      |          |          |  |  |  |     |          |          |          |  |  |      |          |          |          |          |  |       |          |          |          |          |          |
| 10 Co                                                                                                                         | 2.083856                                                                                                                                                                                                                                                                                                                                                                                                                                                                                                                                                                                                                                                                                                                                                                                                                                                                                                                                                                                                                                                                                                                                                                                                                                                                                                                                                                                                                                                                                                                                                                                                                                                                                                                           | 2.325595 | 3.346155 | 3.346202 | 0.000000 |   |   |      |          |  |  |  |  |     |          |          |  |  |  |      |          |          |          |  |  |     |          |          |          |          |  |     |          |          |          |          |          |     |          |          |          |          |          |      |          |          |          |          |          |     |          |          |          |          |          |      |          |          |          |          |          |       |          |          |          |          |          |  |   |   |   |   |    |     |          |  |  |  |  |      |          |          |  |  |  |     |          |          |          |  |  |      |          |          |          |          |  |       |          |          |          |          |          |
|  <p>2. -6557.3369437 +8.6 C<sub>1</sub></p> | <table border="1"> <thead> <tr> <th></th> <th>1</th> <th>2</th> <th>3</th> <th>4</th> <th>5</th> </tr> </thead> <tbody> <tr><td>1 Se</td><td>0.000000</td><td></td><td></td><td></td><td></td></tr> <tr><td>2 B</td><td>2.099431</td><td>0.000000</td><td></td><td></td><td></td></tr> <tr><td>3 B</td><td>3.182439</td><td>2.942313</td><td>0.000000</td><td></td><td></td></tr> <tr><td>4 B</td><td>3.460855</td><td>2.994961</td><td>2.895760</td><td>0.000000</td><td></td></tr> <tr><td>5 B</td><td>3.918273</td><td>2.941623</td><td>1.838373</td><td>1.831521</td><td>0.000000</td></tr> <tr><td>6 B</td><td>3.254271</td><td>1.770246</td><td>2.858422</td><td>1.725821</td><td>1.770451</td></tr> <tr><td>7 B</td><td>1.958261</td><td>1.857594</td><td>1.835845</td><td>3.539920</td><td>2.990641</td></tr> <tr><td>8 B</td><td>3.141801</td><td>1.767449</td><td>1.740982</td><td>2.878578</td><td>1.756133</td></tr> <tr><td>9 Se</td><td>3.638161</td><td>3.842248</td><td>1.987546</td><td>1.997655</td><td>2.085903</td></tr> <tr><td>10 Co</td><td>2.280746</td><td>2.124235</td><td>3.773817</td><td>2.122375</td><td>3.349770</td></tr> <tr> <th></th> <th>6</th> <th>7</th> <th>8</th> <th>9</th> <th>10</th> </tr> <tr><td>6 B</td><td>0.000000</td><td></td><td></td><td></td><td></td></tr> <tr><td>7 B</td><td>2.909014</td><td>0.000000</td><td></td><td></td><td></td></tr> <tr><td>8 B</td><td>1.805168</td><td>1.727966</td><td>0.000000</td><td></td><td></td></tr> <tr><td>9 Se</td><td>3.136375</td><td>3.316543</td><td>3.152315</td><td>0.000000</td><td></td></tr> <tr><td>10 Co</td><td>2.077678</td><td>3.287786</td><td>3.266045</td><td>3.504869</td><td>0.000000</td></tr> </tbody> </table> |          | 1        | 2        | 3        | 4 | 5 | 1 Se | 0.000000 |  |  |  |  | 2 B | 2.099431 | 0.000000 |  |  |  | 3 B  | 3.182439 | 2.942313 | 0.000000 |  |  | 4 B | 3.460855 | 2.994961 | 2.895760 | 0.000000 |  | 5 B | 3.918273 | 2.941623 | 1.838373 | 1.831521 | 0.000000 | 6 B | 3.254271 | 1.770246 | 2.858422 | 1.725821 | 1.770451 | 7 B  | 1.958261 | 1.857594 | 1.835845 | 3.539920 | 2.990641 | 8 B | 3.141801 | 1.767449 | 1.740982 | 2.878578 | 1.756133 | 9 Se | 3.638161 | 3.842248 | 1.987546 | 1.997655 | 2.085903 | 10 Co | 2.280746 | 2.124235 | 3.773817 | 2.122375 | 3.349770 |  | 6 | 7 | 8 | 9 | 10 | 6 B | 0.000000 |  |  |  |  | 7 B  | 2.909014 | 0.000000 |  |  |  | 8 B | 1.805168 | 1.727966 | 0.000000 |  |  | 9 Se | 3.136375 | 3.316543 | 3.152315 | 0.000000 |  | 10 Co | 2.077678 | 3.287786 | 3.266045 | 3.504869 | 0.000000 |
|                                                                                                                               | 1                                                                                                                                                                                                                                                                                                                                                                                                                                                                                                                                                                                                                                                                                                                                                                                                                                                                                                                                                                                                                                                                                                                                                                                                                                                                                                                                                                                                                                                                                                                                                                                                                                                                                                                                  | 2        | 3        | 4        | 5        |   |   |      |          |  |  |  |  |     |          |          |  |  |  |      |          |          |          |  |  |     |          |          |          |          |  |     |          |          |          |          |          |     |          |          |          |          |          |      |          |          |          |          |          |     |          |          |          |          |          |      |          |          |          |          |          |       |          |          |          |          |          |  |   |   |   |   |    |     |          |  |  |  |  |      |          |          |  |  |  |     |          |          |          |  |  |      |          |          |          |          |  |       |          |          |          |          |          |
| 1 Se                                                                                                                          | 0.000000                                                                                                                                                                                                                                                                                                                                                                                                                                                                                                                                                                                                                                                                                                                                                                                                                                                                                                                                                                                                                                                                                                                                                                                                                                                                                                                                                                                                                                                                                                                                                                                                                                                                                                                           |          |          |          |          |   |   |      |          |  |  |  |  |     |          |          |  |  |  |      |          |          |          |  |  |     |          |          |          |          |  |     |          |          |          |          |          |     |          |          |          |          |          |      |          |          |          |          |          |     |          |          |          |          |          |      |          |          |          |          |          |       |          |          |          |          |          |  |   |   |   |   |    |     |          |  |  |  |  |      |          |          |  |  |  |     |          |          |          |  |  |      |          |          |          |          |  |       |          |          |          |          |          |
| 2 B                                                                                                                           | 2.099431                                                                                                                                                                                                                                                                                                                                                                                                                                                                                                                                                                                                                                                                                                                                                                                                                                                                                                                                                                                                                                                                                                                                                                                                                                                                                                                                                                                                                                                                                                                                                                                                                                                                                                                           | 0.000000 |          |          |          |   |   |      |          |  |  |  |  |     |          |          |  |  |  |      |          |          |          |  |  |     |          |          |          |          |  |     |          |          |          |          |          |     |          |          |          |          |          |      |          |          |          |          |          |     |          |          |          |          |          |      |          |          |          |          |          |       |          |          |          |          |          |  |   |   |   |   |    |     |          |  |  |  |  |      |          |          |  |  |  |     |          |          |          |  |  |      |          |          |          |          |  |       |          |          |          |          |          |
| 3 B                                                                                                                           | 3.182439                                                                                                                                                                                                                                                                                                                                                                                                                                                                                                                                                                                                                                                                                                                                                                                                                                                                                                                                                                                                                                                                                                                                                                                                                                                                                                                                                                                                                                                                                                                                                                                                                                                                                                                           | 2.942313 | 0.000000 |          |          |   |   |      |          |  |  |  |  |     |          |          |  |  |  |      |          |          |          |  |  |     |          |          |          |          |  |     |          |          |          |          |          |     |          |          |          |          |          |      |          |          |          |          |          |     |          |          |          |          |          |      |          |          |          |          |          |       |          |          |          |          |          |  |   |   |   |   |    |     |          |  |  |  |  |      |          |          |  |  |  |     |          |          |          |  |  |      |          |          |          |          |  |       |          |          |          |          |          |
| 4 B                                                                                                                           | 3.460855                                                                                                                                                                                                                                                                                                                                                                                                                                                                                                                                                                                                                                                                                                                                                                                                                                                                                                                                                                                                                                                                                                                                                                                                                                                                                                                                                                                                                                                                                                                                                                                                                                                                                                                           | 2.994961 | 2.895760 | 0.000000 |          |   |   |      |          |  |  |  |  |     |          |          |  |  |  |      |          |          |          |  |  |     |          |          |          |          |  |     |          |          |          |          |          |     |          |          |          |          |          |      |          |          |          |          |          |     |          |          |          |          |          |      |          |          |          |          |          |       |          |          |          |          |          |  |   |   |   |   |    |     |          |  |  |  |  |      |          |          |  |  |  |     |          |          |          |  |  |      |          |          |          |          |  |       |          |          |          |          |          |
| 5 B                                                                                                                           | 3.918273                                                                                                                                                                                                                                                                                                                                                                                                                                                                                                                                                                                                                                                                                                                                                                                                                                                                                                                                                                                                                                                                                                                                                                                                                                                                                                                                                                                                                                                                                                                                                                                                                                                                                                                           | 2.941623 | 1.838373 | 1.831521 | 0.000000 |   |   |      |          |  |  |  |  |     |          |          |  |  |  |      |          |          |          |  |  |     |          |          |          |          |  |     |          |          |          |          |          |     |          |          |          |          |          |      |          |          |          |          |          |     |          |          |          |          |          |      |          |          |          |          |          |       |          |          |          |          |          |  |   |   |   |   |    |     |          |  |  |  |  |      |          |          |  |  |  |     |          |          |          |  |  |      |          |          |          |          |  |       |          |          |          |          |          |
| 6 B                                                                                                                           | 3.254271                                                                                                                                                                                                                                                                                                                                                                                                                                                                                                                                                                                                                                                                                                                                                                                                                                                                                                                                                                                                                                                                                                                                                                                                                                                                                                                                                                                                                                                                                                                                                                                                                                                                                                                           | 1.770246 | 2.858422 | 1.725821 | 1.770451 |   |   |      |          |  |  |  |  |     |          |          |  |  |  |      |          |          |          |  |  |     |          |          |          |          |  |     |          |          |          |          |          |     |          |          |          |          |          |      |          |          |          |          |          |     |          |          |          |          |          |      |          |          |          |          |          |       |          |          |          |          |          |  |   |   |   |   |    |     |          |  |  |  |  |      |          |          |  |  |  |     |          |          |          |  |  |      |          |          |          |          |  |       |          |          |          |          |          |
| 7 B                                                                                                                           | 1.958261                                                                                                                                                                                                                                                                                                                                                                                                                                                                                                                                                                                                                                                                                                                                                                                                                                                                                                                                                                                                                                                                                                                                                                                                                                                                                                                                                                                                                                                                                                                                                                                                                                                                                                                           | 1.857594 | 1.835845 | 3.539920 | 2.990641 |   |   |      |          |  |  |  |  |     |          |          |  |  |  |      |          |          |          |  |  |     |          |          |          |          |  |     |          |          |          |          |          |     |          |          |          |          |          |      |          |          |          |          |          |     |          |          |          |          |          |      |          |          |          |          |          |       |          |          |          |          |          |  |   |   |   |   |    |     |          |  |  |  |  |      |          |          |  |  |  |     |          |          |          |  |  |      |          |          |          |          |  |       |          |          |          |          |          |
| 8 B                                                                                                                           | 3.141801                                                                                                                                                                                                                                                                                                                                                                                                                                                                                                                                                                                                                                                                                                                                                                                                                                                                                                                                                                                                                                                                                                                                                                                                                                                                                                                                                                                                                                                                                                                                                                                                                                                                                                                           | 1.767449 | 1.740982 | 2.878578 | 1.756133 |   |   |      |          |  |  |  |  |     |          |          |  |  |  |      |          |          |          |  |  |     |          |          |          |          |  |     |          |          |          |          |          |     |          |          |          |          |          |      |          |          |          |          |          |     |          |          |          |          |          |      |          |          |          |          |          |       |          |          |          |          |          |  |   |   |   |   |    |     |          |  |  |  |  |      |          |          |  |  |  |     |          |          |          |  |  |      |          |          |          |          |  |       |          |          |          |          |          |
| 9 Se                                                                                                                          | 3.638161                                                                                                                                                                                                                                                                                                                                                                                                                                                                                                                                                                                                                                                                                                                                                                                                                                                                                                                                                                                                                                                                                                                                                                                                                                                                                                                                                                                                                                                                                                                                                                                                                                                                                                                           | 3.842248 | 1.987546 | 1.997655 | 2.085903 |   |   |      |          |  |  |  |  |     |          |          |  |  |  |      |          |          |          |  |  |     |          |          |          |          |  |     |          |          |          |          |          |     |          |          |          |          |          |      |          |          |          |          |          |     |          |          |          |          |          |      |          |          |          |          |          |       |          |          |          |          |          |  |   |   |   |   |    |     |          |  |  |  |  |      |          |          |  |  |  |     |          |          |          |  |  |      |          |          |          |          |  |       |          |          |          |          |          |
| 10 Co                                                                                                                         | 2.280746                                                                                                                                                                                                                                                                                                                                                                                                                                                                                                                                                                                                                                                                                                                                                                                                                                                                                                                                                                                                                                                                                                                                                                                                                                                                                                                                                                                                                                                                                                                                                                                                                                                                                                                           | 2.124235 | 3.773817 | 2.122375 | 3.349770 |   |   |      |          |  |  |  |  |     |          |          |  |  |  |      |          |          |          |  |  |     |          |          |          |          |  |     |          |          |          |          |          |     |          |          |          |          |          |      |          |          |          |          |          |     |          |          |          |          |          |      |          |          |          |          |          |       |          |          |          |          |          |  |   |   |   |   |    |     |          |  |  |  |  |      |          |          |  |  |  |     |          |          |          |  |  |      |          |          |          |          |  |       |          |          |          |          |          |
|                                                                                                                               | 6                                                                                                                                                                                                                                                                                                                                                                                                                                                                                                                                                                                                                                                                                                                                                                                                                                                                                                                                                                                                                                                                                                                                                                                                                                                                                                                                                                                                                                                                                                                                                                                                                                                                                                                                  | 7        | 8        | 9        | 10       |   |   |      |          |  |  |  |  |     |          |          |  |  |  |      |          |          |          |  |  |     |          |          |          |          |  |     |          |          |          |          |          |     |          |          |          |          |          |      |          |          |          |          |          |     |          |          |          |          |          |      |          |          |          |          |          |       |          |          |          |          |          |  |   |   |   |   |    |     |          |  |  |  |  |      |          |          |  |  |  |     |          |          |          |  |  |      |          |          |          |          |  |       |          |          |          |          |          |
| 6 B                                                                                                                           | 0.000000                                                                                                                                                                                                                                                                                                                                                                                                                                                                                                                                                                                                                                                                                                                                                                                                                                                                                                                                                                                                                                                                                                                                                                                                                                                                                                                                                                                                                                                                                                                                                                                                                                                                                                                           |          |          |          |          |   |   |      |          |  |  |  |  |     |          |          |  |  |  |      |          |          |          |  |  |     |          |          |          |          |  |     |          |          |          |          |          |     |          |          |          |          |          |      |          |          |          |          |          |     |          |          |          |          |          |      |          |          |          |          |          |       |          |          |          |          |          |  |   |   |   |   |    |     |          |  |  |  |  |      |          |          |  |  |  |     |          |          |          |  |  |      |          |          |          |          |  |       |          |          |          |          |          |
| 7 B                                                                                                                           | 2.909014                                                                                                                                                                                                                                                                                                                                                                                                                                                                                                                                                                                                                                                                                                                                                                                                                                                                                                                                                                                                                                                                                                                                                                                                                                                                                                                                                                                                                                                                                                                                                                                                                                                                                                                           | 0.000000 |          |          |          |   |   |      |          |  |  |  |  |     |          |          |  |  |  |      |          |          |          |  |  |     |          |          |          |          |  |     |          |          |          |          |          |     |          |          |          |          |          |      |          |          |          |          |          |     |          |          |          |          |          |      |          |          |          |          |          |       |          |          |          |          |          |  |   |   |   |   |    |     |          |  |  |  |  |      |          |          |  |  |  |     |          |          |          |  |  |      |          |          |          |          |  |       |          |          |          |          |          |
| 8 B                                                                                                                           | 1.805168                                                                                                                                                                                                                                                                                                                                                                                                                                                                                                                                                                                                                                                                                                                                                                                                                                                                                                                                                                                                                                                                                                                                                                                                                                                                                                                                                                                                                                                                                                                                                                                                                                                                                                                           | 1.727966 | 0.000000 |          |          |   |   |      |          |  |  |  |  |     |          |          |  |  |  |      |          |          |          |  |  |     |          |          |          |          |  |     |          |          |          |          |          |     |          |          |          |          |          |      |          |          |          |          |          |     |          |          |          |          |          |      |          |          |          |          |          |       |          |          |          |          |          |  |   |   |   |   |    |     |          |  |  |  |  |      |          |          |  |  |  |     |          |          |          |  |  |      |          |          |          |          |  |       |          |          |          |          |          |
| 9 Se                                                                                                                          | 3.136375                                                                                                                                                                                                                                                                                                                                                                                                                                                                                                                                                                                                                                                                                                                                                                                                                                                                                                                                                                                                                                                                                                                                                                                                                                                                                                                                                                                                                                                                                                                                                                                                                                                                                                                           | 3.316543 | 3.152315 | 0.000000 |          |   |   |      |          |  |  |  |  |     |          |          |  |  |  |      |          |          |          |  |  |     |          |          |          |          |  |     |          |          |          |          |          |     |          |          |          |          |          |      |          |          |          |          |          |     |          |          |          |          |          |      |          |          |          |          |          |       |          |          |          |          |          |  |   |   |   |   |    |     |          |  |  |  |  |      |          |          |  |  |  |     |          |          |          |  |  |      |          |          |          |          |  |       |          |          |          |          |          |
| 10 Co                                                                                                                         | 2.077678                                                                                                                                                                                                                                                                                                                                                                                                                                                                                                                                                                                                                                                                                                                                                                                                                                                                                                                                                                                                                                                                                                                                                                                                                                                                                                                                                                                                                                                                                                                                                                                                                                                                                                                           | 3.287786 | 3.266045 | 3.504869 | 0.000000 |   |   |      |          |  |  |  |  |     |          |          |  |  |  |      |          |          |          |  |  |     |          |          |          |          |  |     |          |          |          |          |          |     |          |          |          |          |          |      |          |          |          |          |          |     |          |          |          |          |          |      |          |          |          |          |          |       |          |          |          |          |          |  |   |   |   |   |    |     |          |  |  |  |  |      |          |          |  |  |  |     |          |          |          |  |  |      |          |          |          |          |  |       |          |          |          |          |          |

| 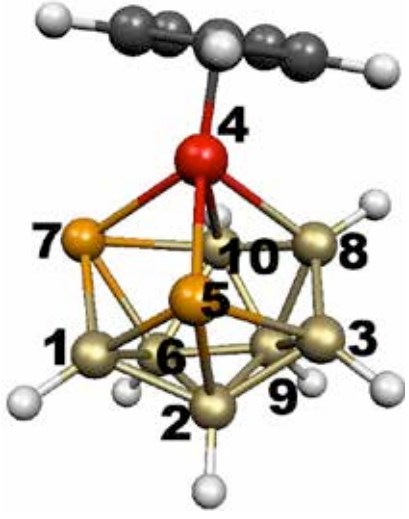 <p>3. -6557.3289684 +13.6 C<sub>1</sub></p>  | <table border="1"> <thead> <tr> <th></th> <th>1</th> <th>2</th> <th>3</th> <th>4</th> <th>5</th> </tr> </thead> <tbody> <tr><td>1 B</td><td>0.000000</td><td></td><td></td><td></td><td></td></tr> <tr><td>2 B</td><td>1.800769</td><td>0.000000</td><td></td><td></td><td></td></tr> <tr><td>3 B</td><td>3.128768</td><td>1.805042</td><td>0.000000</td><td></td><td></td></tr> <tr><td>4 Co</td><td>3.092048</td><td>3.453453</td><td>2.987857</td><td>0.000000</td><td></td></tr> <tr><td>5 Se</td><td>2.093464</td><td>2.155687</td><td>2.119538</td><td>2.383260</td><td>0.000000</td></tr> <tr><td>6 B</td><td>1.797178</td><td>1.760442</td><td>2.943854</td><td>3.276258</td><td>3.123148</td></tr> <tr><td>7 Se</td><td>2.026482</td><td>3.206441</td><td>3.926608</td><td>2.340813</td><td>3.133222</td></tr> <tr><td>8 B</td><td>3.581079</td><td>2.801932</td><td>1.665439</td><td>2.141135</td><td>2.843308</td></tr> <tr><td>9 B</td><td>2.922485</td><td>1.743591</td><td>1.776329</td><td>3.199532</td><td>3.104509</td></tr> <tr><td>10 B</td><td>2.988328</td><td>2.832069</td><td>2.800363</td><td>2.168333</td><td>3.304443</td></tr> <tr> <th></th> <th>6</th> <th>7</th> <th>8</th> <th>9</th> <th>10</th> </tr> <tr><td>6 B</td><td>0.000000</td><td></td><td></td><td></td><td></td></tr> <tr><td>7 Se</td><td>2.104672</td><td>0.000000</td><td></td><td></td><td></td></tr> <tr><td>8 B</td><td>2.956834</td><td>3.432387</td><td>0.000000</td><td></td><td></td></tr> <tr><td>9 B</td><td>1.729653</td><td>3.256476</td><td>1.763538</td><td>0.000000</td><td></td></tr> <tr><td>10 B</td><td>1.911036</td><td>2.165804</td><td>1.734367</td><td>1.738008</td><td>0.000000</td></tr> </tbody> </table>  |          | 1        | 2        | 3        | 4 | 5 | 1 B | 0.000000 |  |  |  |  | 2 B | 1.800769 | 0.000000 |  |  |  | 3 B | 3.128768 | 1.805042 | 0.000000 |  |  | 4 Co | 3.092048 | 3.453453 | 2.987857 | 0.000000 |  | 5 Se | 2.093464 | 2.155687 | 2.119538 | 2.383260 | 0.000000 | 6 B | 1.797178 | 1.760442 | 2.943854 | 3.276258 | 3.123148 | 7 Se | 2.026482 | 3.206441 | 3.926608 | 2.340813 | 3.133222 | 8 B | 3.581079 | 2.801932 | 1.665439 | 2.141135 | 2.843308 | 9 B  | 2.922485 | 1.743591 | 1.776329 | 3.199532 | 3.104509 | 10 B  | 2.988328 | 2.832069 | 2.800363 | 2.168333 | 3.304443 |  | 6 | 7 | 8 | 9 | 10 | 6 B | 0.000000 |  |  |  |  | 7 Se | 2.104672 | 0.000000 |  |  |  | 8 B | 2.956834 | 3.432387 | 0.000000 |  |  | 9 B  | 1.729653 | 3.256476 | 1.763538 | 0.000000 |  | 10 B  | 1.911036 | 2.165804 | 1.734367 | 1.738008 | 0.000000 |
|--------------------------------------------------------------------------------------------------------------------------------|------------------------------------------------------------------------------------------------------------------------------------------------------------------------------------------------------------------------------------------------------------------------------------------------------------------------------------------------------------------------------------------------------------------------------------------------------------------------------------------------------------------------------------------------------------------------------------------------------------------------------------------------------------------------------------------------------------------------------------------------------------------------------------------------------------------------------------------------------------------------------------------------------------------------------------------------------------------------------------------------------------------------------------------------------------------------------------------------------------------------------------------------------------------------------------------------------------------------------------------------------------------------------------------------------------------------------------------------------------------------------------------------------------------------------------------------------------------------------------------------------------------------------------------------------------------------------------------------------------------------------------------------------------------------------------------------------------------------------------|----------|----------|----------|----------|---|---|-----|----------|--|--|--|--|-----|----------|----------|--|--|--|-----|----------|----------|----------|--|--|------|----------|----------|----------|----------|--|------|----------|----------|----------|----------|----------|-----|----------|----------|----------|----------|----------|------|----------|----------|----------|----------|----------|-----|----------|----------|----------|----------|----------|------|----------|----------|----------|----------|----------|-------|----------|----------|----------|----------|----------|--|---|---|---|---|----|-----|----------|--|--|--|--|------|----------|----------|--|--|--|-----|----------|----------|----------|--|--|------|----------|----------|----------|----------|--|-------|----------|----------|----------|----------|----------|
|                                                                                                                                | 1                                                                                                                                                                                                                                                                                                                                                                                                                                                                                                                                                                                                                                                                                                                                                                                                                                                                                                                                                                                                                                                                                                                                                                                                                                                                                                                                                                                                                                                                                                                                                                                                                                                                                                                                  | 2        | 3        | 4        | 5        |   |   |     |          |  |  |  |  |     |          |          |  |  |  |     |          |          |          |  |  |      |          |          |          |          |  |      |          |          |          |          |          |     |          |          |          |          |          |      |          |          |          |          |          |     |          |          |          |          |          |      |          |          |          |          |          |       |          |          |          |          |          |  |   |   |   |   |    |     |          |  |  |  |  |      |          |          |  |  |  |     |          |          |          |  |  |      |          |          |          |          |  |       |          |          |          |          |          |
| 1 B                                                                                                                            | 0.000000                                                                                                                                                                                                                                                                                                                                                                                                                                                                                                                                                                                                                                                                                                                                                                                                                                                                                                                                                                                                                                                                                                                                                                                                                                                                                                                                                                                                                                                                                                                                                                                                                                                                                                                           |          |          |          |          |   |   |     |          |  |  |  |  |     |          |          |  |  |  |     |          |          |          |  |  |      |          |          |          |          |  |      |          |          |          |          |          |     |          |          |          |          |          |      |          |          |          |          |          |     |          |          |          |          |          |      |          |          |          |          |          |       |          |          |          |          |          |  |   |   |   |   |    |     |          |  |  |  |  |      |          |          |  |  |  |     |          |          |          |  |  |      |          |          |          |          |  |       |          |          |          |          |          |
| 2 B                                                                                                                            | 1.800769                                                                                                                                                                                                                                                                                                                                                                                                                                                                                                                                                                                                                                                                                                                                                                                                                                                                                                                                                                                                                                                                                                                                                                                                                                                                                                                                                                                                                                                                                                                                                                                                                                                                                                                           | 0.000000 |          |          |          |   |   |     |          |  |  |  |  |     |          |          |  |  |  |     |          |          |          |  |  |      |          |          |          |          |  |      |          |          |          |          |          |     |          |          |          |          |          |      |          |          |          |          |          |     |          |          |          |          |          |      |          |          |          |          |          |       |          |          |          |          |          |  |   |   |   |   |    |     |          |  |  |  |  |      |          |          |  |  |  |     |          |          |          |  |  |      |          |          |          |          |  |       |          |          |          |          |          |
| 3 B                                                                                                                            | 3.128768                                                                                                                                                                                                                                                                                                                                                                                                                                                                                                                                                                                                                                                                                                                                                                                                                                                                                                                                                                                                                                                                                                                                                                                                                                                                                                                                                                                                                                                                                                                                                                                                                                                                                                                           | 1.805042 | 0.000000 |          |          |   |   |     |          |  |  |  |  |     |          |          |  |  |  |     |          |          |          |  |  |      |          |          |          |          |  |      |          |          |          |          |          |     |          |          |          |          |          |      |          |          |          |          |          |     |          |          |          |          |          |      |          |          |          |          |          |       |          |          |          |          |          |  |   |   |   |   |    |     |          |  |  |  |  |      |          |          |  |  |  |     |          |          |          |  |  |      |          |          |          |          |  |       |          |          |          |          |          |
| 4 Co                                                                                                                           | 3.092048                                                                                                                                                                                                                                                                                                                                                                                                                                                                                                                                                                                                                                                                                                                                                                                                                                                                                                                                                                                                                                                                                                                                                                                                                                                                                                                                                                                                                                                                                                                                                                                                                                                                                                                           | 3.453453 | 2.987857 | 0.000000 |          |   |   |     |          |  |  |  |  |     |          |          |  |  |  |     |          |          |          |  |  |      |          |          |          |          |  |      |          |          |          |          |          |     |          |          |          |          |          |      |          |          |          |          |          |     |          |          |          |          |          |      |          |          |          |          |          |       |          |          |          |          |          |  |   |   |   |   |    |     |          |  |  |  |  |      |          |          |  |  |  |     |          |          |          |  |  |      |          |          |          |          |  |       |          |          |          |          |          |
| 5 Se                                                                                                                           | 2.093464                                                                                                                                                                                                                                                                                                                                                                                                                                                                                                                                                                                                                                                                                                                                                                                                                                                                                                                                                                                                                                                                                                                                                                                                                                                                                                                                                                                                                                                                                                                                                                                                                                                                                                                           | 2.155687 | 2.119538 | 2.383260 | 0.000000 |   |   |     |          |  |  |  |  |     |          |          |  |  |  |     |          |          |          |  |  |      |          |          |          |          |  |      |          |          |          |          |          |     |          |          |          |          |          |      |          |          |          |          |          |     |          |          |          |          |          |      |          |          |          |          |          |       |          |          |          |          |          |  |   |   |   |   |    |     |          |  |  |  |  |      |          |          |  |  |  |     |          |          |          |  |  |      |          |          |          |          |  |       |          |          |          |          |          |
| 6 B                                                                                                                            | 1.797178                                                                                                                                                                                                                                                                                                                                                                                                                                                                                                                                                                                                                                                                                                                                                                                                                                                                                                                                                                                                                                                                                                                                                                                                                                                                                                                                                                                                                                                                                                                                                                                                                                                                                                                           | 1.760442 | 2.943854 | 3.276258 | 3.123148 |   |   |     |          |  |  |  |  |     |          |          |  |  |  |     |          |          |          |  |  |      |          |          |          |          |  |      |          |          |          |          |          |     |          |          |          |          |          |      |          |          |          |          |          |     |          |          |          |          |          |      |          |          |          |          |          |       |          |          |          |          |          |  |   |   |   |   |    |     |          |  |  |  |  |      |          |          |  |  |  |     |          |          |          |  |  |      |          |          |          |          |  |       |          |          |          |          |          |
| 7 Se                                                                                                                           | 2.026482                                                                                                                                                                                                                                                                                                                                                                                                                                                                                                                                                                                                                                                                                                                                                                                                                                                                                                                                                                                                                                                                                                                                                                                                                                                                                                                                                                                                                                                                                                                                                                                                                                                                                                                           | 3.206441 | 3.926608 | 2.340813 | 3.133222 |   |   |     |          |  |  |  |  |     |          |          |  |  |  |     |          |          |          |  |  |      |          |          |          |          |  |      |          |          |          |          |          |     |          |          |          |          |          |      |          |          |          |          |          |     |          |          |          |          |          |      |          |          |          |          |          |       |          |          |          |          |          |  |   |   |   |   |    |     |          |  |  |  |  |      |          |          |  |  |  |     |          |          |          |  |  |      |          |          |          |          |  |       |          |          |          |          |          |
| 8 B                                                                                                                            | 3.581079                                                                                                                                                                                                                                                                                                                                                                                                                                                                                                                                                                                                                                                                                                                                                                                                                                                                                                                                                                                                                                                                                                                                                                                                                                                                                                                                                                                                                                                                                                                                                                                                                                                                                                                           | 2.801932 | 1.665439 | 2.141135 | 2.843308 |   |   |     |          |  |  |  |  |     |          |          |  |  |  |     |          |          |          |  |  |      |          |          |          |          |  |      |          |          |          |          |          |     |          |          |          |          |          |      |          |          |          |          |          |     |          |          |          |          |          |      |          |          |          |          |          |       |          |          |          |          |          |  |   |   |   |   |    |     |          |  |  |  |  |      |          |          |  |  |  |     |          |          |          |  |  |      |          |          |          |          |  |       |          |          |          |          |          |
| 9 B                                                                                                                            | 2.922485                                                                                                                                                                                                                                                                                                                                                                                                                                                                                                                                                                                                                                                                                                                                                                                                                                                                                                                                                                                                                                                                                                                                                                                                                                                                                                                                                                                                                                                                                                                                                                                                                                                                                                                           | 1.743591 | 1.776329 | 3.199532 | 3.104509 |   |   |     |          |  |  |  |  |     |          |          |  |  |  |     |          |          |          |  |  |      |          |          |          |          |  |      |          |          |          |          |          |     |          |          |          |          |          |      |          |          |          |          |          |     |          |          |          |          |          |      |          |          |          |          |          |       |          |          |          |          |          |  |   |   |   |   |    |     |          |  |  |  |  |      |          |          |  |  |  |     |          |          |          |  |  |      |          |          |          |          |  |       |          |          |          |          |          |
| 10 B                                                                                                                           | 2.988328                                                                                                                                                                                                                                                                                                                                                                                                                                                                                                                                                                                                                                                                                                                                                                                                                                                                                                                                                                                                                                                                                                                                                                                                                                                                                                                                                                                                                                                                                                                                                                                                                                                                                                                           | 2.832069 | 2.800363 | 2.168333 | 3.304443 |   |   |     |          |  |  |  |  |     |          |          |  |  |  |     |          |          |          |  |  |      |          |          |          |          |  |      |          |          |          |          |          |     |          |          |          |          |          |      |          |          |          |          |          |     |          |          |          |          |          |      |          |          |          |          |          |       |          |          |          |          |          |  |   |   |   |   |    |     |          |  |  |  |  |      |          |          |  |  |  |     |          |          |          |  |  |      |          |          |          |          |  |       |          |          |          |          |          |
|                                                                                                                                | 6                                                                                                                                                                                                                                                                                                                                                                                                                                                                                                                                                                                                                                                                                                                                                                                                                                                                                                                                                                                                                                                                                                                                                                                                                                                                                                                                                                                                                                                                                                                                                                                                                                                                                                                                  | 7        | 8        | 9        | 10       |   |   |     |          |  |  |  |  |     |          |          |  |  |  |     |          |          |          |  |  |      |          |          |          |          |  |      |          |          |          |          |          |     |          |          |          |          |          |      |          |          |          |          |          |     |          |          |          |          |          |      |          |          |          |          |          |       |          |          |          |          |          |  |   |   |   |   |    |     |          |  |  |  |  |      |          |          |  |  |  |     |          |          |          |  |  |      |          |          |          |          |  |       |          |          |          |          |          |
| 6 B                                                                                                                            | 0.000000                                                                                                                                                                                                                                                                                                                                                                                                                                                                                                                                                                                                                                                                                                                                                                                                                                                                                                                                                                                                                                                                                                                                                                                                                                                                                                                                                                                                                                                                                                                                                                                                                                                                                                                           |          |          |          |          |   |   |     |          |  |  |  |  |     |          |          |  |  |  |     |          |          |          |  |  |      |          |          |          |          |  |      |          |          |          |          |          |     |          |          |          |          |          |      |          |          |          |          |          |     |          |          |          |          |          |      |          |          |          |          |          |       |          |          |          |          |          |  |   |   |   |   |    |     |          |  |  |  |  |      |          |          |  |  |  |     |          |          |          |  |  |      |          |          |          |          |  |       |          |          |          |          |          |
| 7 Se                                                                                                                           | 2.104672                                                                                                                                                                                                                                                                                                                                                                                                                                                                                                                                                                                                                                                                                                                                                                                                                                                                                                                                                                                                                                                                                                                                                                                                                                                                                                                                                                                                                                                                                                                                                                                                                                                                                                                           | 0.000000 |          |          |          |   |   |     |          |  |  |  |  |     |          |          |  |  |  |     |          |          |          |  |  |      |          |          |          |          |  |      |          |          |          |          |          |     |          |          |          |          |          |      |          |          |          |          |          |     |          |          |          |          |          |      |          |          |          |          |          |       |          |          |          |          |          |  |   |   |   |   |    |     |          |  |  |  |  |      |          |          |  |  |  |     |          |          |          |  |  |      |          |          |          |          |  |       |          |          |          |          |          |
| 8 B                                                                                                                            | 2.956834                                                                                                                                                                                                                                                                                                                                                                                                                                                                                                                                                                                                                                                                                                                                                                                                                                                                                                                                                                                                                                                                                                                                                                                                                                                                                                                                                                                                                                                                                                                                                                                                                                                                                                                           | 3.432387 | 0.000000 |          |          |   |   |     |          |  |  |  |  |     |          |          |  |  |  |     |          |          |          |  |  |      |          |          |          |          |  |      |          |          |          |          |          |     |          |          |          |          |          |      |          |          |          |          |          |     |          |          |          |          |          |      |          |          |          |          |          |       |          |          |          |          |          |  |   |   |   |   |    |     |          |  |  |  |  |      |          |          |  |  |  |     |          |          |          |  |  |      |          |          |          |          |  |       |          |          |          |          |          |
| 9 B                                                                                                                            | 1.729653                                                                                                                                                                                                                                                                                                                                                                                                                                                                                                                                                                                                                                                                                                                                                                                                                                                                                                                                                                                                                                                                                                                                                                                                                                                                                                                                                                                                                                                                                                                                                                                                                                                                                                                           | 3.256476 | 1.763538 | 0.000000 |          |   |   |     |          |  |  |  |  |     |          |          |  |  |  |     |          |          |          |  |  |      |          |          |          |          |  |      |          |          |          |          |          |     |          |          |          |          |          |      |          |          |          |          |          |     |          |          |          |          |          |      |          |          |          |          |          |       |          |          |          |          |          |  |   |   |   |   |    |     |          |  |  |  |  |      |          |          |  |  |  |     |          |          |          |  |  |      |          |          |          |          |  |       |          |          |          |          |          |
| 10 B                                                                                                                           | 1.911036                                                                                                                                                                                                                                                                                                                                                                                                                                                                                                                                                                                                                                                                                                                                                                                                                                                                                                                                                                                                                                                                                                                                                                                                                                                                                                                                                                                                                                                                                                                                                                                                                                                                                                                           | 2.165804 | 1.734367 | 1.738008 | 0.000000 |   |   |     |          |  |  |  |  |     |          |          |  |  |  |     |          |          |          |  |  |      |          |          |          |          |  |      |          |          |          |          |          |     |          |          |          |          |          |      |          |          |          |          |          |     |          |          |          |          |          |      |          |          |          |          |          |       |          |          |          |          |          |  |   |   |   |   |    |     |          |  |  |  |  |      |          |          |  |  |  |     |          |          |          |  |  |      |          |          |          |          |  |       |          |          |          |          |          |
|  <p>4. -6557.3283267 +14.0 C<sub>1</sub></p> | <table border="1"> <thead> <tr> <th></th> <th>1</th> <th>2</th> <th>3</th> <th>4</th> <th>5</th> </tr> </thead> <tbody> <tr><td>1 B</td><td>0.000000</td><td></td><td></td><td></td><td></td></tr> <tr><td>2 B</td><td>1.873436</td><td>0.000000</td><td></td><td></td><td></td></tr> <tr><td>3 B</td><td>2.473266</td><td>2.756466</td><td>0.000000</td><td></td><td></td></tr> <tr><td>4 Co</td><td>3.157485</td><td>3.420232</td><td>3.559724</td><td>0.000000</td><td></td></tr> <tr><td>5 B</td><td>2.934827</td><td>2.822205</td><td>1.826778</td><td>2.125094</td><td>0.000000</td></tr> <tr><td>6 B</td><td>2.849843</td><td>1.897019</td><td>2.968642</td><td>2.114894</td><td>1.796760</td></tr> <tr><td>7 B</td><td>1.782140</td><td>1.701274</td><td>1.663291</td><td>4.074043</td><td>2.830238</td></tr> <tr><td>8 B</td><td>2.725181</td><td>1.739351</td><td>1.763675</td><td>3.352676</td><td>1.744242</td></tr> <tr><td>9 Se</td><td>2.062759</td><td>3.308747</td><td>2.140006</td><td>2.369389</td><td>2.134596</td></tr> <tr><td>10 Se</td><td>2.161562</td><td>2.105319</td><td>3.880585</td><td>2.335091</td><td>3.225871</td></tr> <tr> <th></th> <th>6</th> <th>7</th> <th>8</th> <th>9</th> <th>10</th> </tr> <tr><td>6 B</td><td>0.000000</td><td></td><td></td><td></td><td></td></tr> <tr><td>7 B</td><td>2.971963</td><td>0.000000</td><td></td><td></td><td></td></tr> <tr><td>8 B</td><td>1.761654</td><td>1.783985</td><td>0.000000</td><td></td><td></td></tr> <tr><td>9 Se</td><td>3.125460</td><td>2.898511</td><td>3.114330</td><td>0.000000</td><td></td></tr> <tr><td>10 Se</td><td>2.101875</td><td>3.355603</td><td>3.245938</td><td>3.124320</td><td>0.000000</td></tr> </tbody> </table> |          | 1        | 2        | 3        | 4 | 5 | 1 B | 0.000000 |  |  |  |  | 2 B | 1.873436 | 0.000000 |  |  |  | 3 B | 2.473266 | 2.756466 | 0.000000 |  |  | 4 Co | 3.157485 | 3.420232 | 3.559724 | 0.000000 |  | 5 B  | 2.934827 | 2.822205 | 1.826778 | 2.125094 | 0.000000 | 6 B | 2.849843 | 1.897019 | 2.968642 | 2.114894 | 1.796760 | 7 B  | 1.782140 | 1.701274 | 1.663291 | 4.074043 | 2.830238 | 8 B | 2.725181 | 1.739351 | 1.763675 | 3.352676 | 1.744242 | 9 Se | 2.062759 | 3.308747 | 2.140006 | 2.369389 | 2.134596 | 10 Se | 2.161562 | 2.105319 | 3.880585 | 2.335091 | 3.225871 |  | 6 | 7 | 8 | 9 | 10 | 6 B | 0.000000 |  |  |  |  | 7 B  | 2.971963 | 0.000000 |  |  |  | 8 B | 1.761654 | 1.783985 | 0.000000 |  |  | 9 Se | 3.125460 | 2.898511 | 3.114330 | 0.000000 |  | 10 Se | 2.101875 | 3.355603 | 3.245938 | 3.124320 | 0.000000 |
|                                                                                                                                | 1                                                                                                                                                                                                                                                                                                                                                                                                                                                                                                                                                                                                                                                                                                                                                                                                                                                                                                                                                                                                                                                                                                                                                                                                                                                                                                                                                                                                                                                                                                                                                                                                                                                                                                                                  | 2        | 3        | 4        | 5        |   |   |     |          |  |  |  |  |     |          |          |  |  |  |     |          |          |          |  |  |      |          |          |          |          |  |      |          |          |          |          |          |     |          |          |          |          |          |      |          |          |          |          |          |     |          |          |          |          |          |      |          |          |          |          |          |       |          |          |          |          |          |  |   |   |   |   |    |     |          |  |  |  |  |      |          |          |  |  |  |     |          |          |          |  |  |      |          |          |          |          |  |       |          |          |          |          |          |
| 1 B                                                                                                                            | 0.000000                                                                                                                                                                                                                                                                                                                                                                                                                                                                                                                                                                                                                                                                                                                                                                                                                                                                                                                                                                                                                                                                                                                                                                                                                                                                                                                                                                                                                                                                                                                                                                                                                                                                                                                           |          |          |          |          |   |   |     |          |  |  |  |  |     |          |          |  |  |  |     |          |          |          |  |  |      |          |          |          |          |  |      |          |          |          |          |          |     |          |          |          |          |          |      |          |          |          |          |          |     |          |          |          |          |          |      |          |          |          |          |          |       |          |          |          |          |          |  |   |   |   |   |    |     |          |  |  |  |  |      |          |          |  |  |  |     |          |          |          |  |  |      |          |          |          |          |  |       |          |          |          |          |          |
| 2 B                                                                                                                            | 1.873436                                                                                                                                                                                                                                                                                                                                                                                                                                                                                                                                                                                                                                                                                                                                                                                                                                                                                                                                                                                                                                                                                                                                                                                                                                                                                                                                                                                                                                                                                                                                                                                                                                                                                                                           | 0.000000 |          |          |          |   |   |     |          |  |  |  |  |     |          |          |  |  |  |     |          |          |          |  |  |      |          |          |          |          |  |      |          |          |          |          |          |     |          |          |          |          |          |      |          |          |          |          |          |     |          |          |          |          |          |      |          |          |          |          |          |       |          |          |          |          |          |  |   |   |   |   |    |     |          |  |  |  |  |      |          |          |  |  |  |     |          |          |          |  |  |      |          |          |          |          |  |       |          |          |          |          |          |
| 3 B                                                                                                                            | 2.473266                                                                                                                                                                                                                                                                                                                                                                                                                                                                                                                                                                                                                                                                                                                                                                                                                                                                                                                                                                                                                                                                                                                                                                                                                                                                                                                                                                                                                                                                                                                                                                                                                                                                                                                           | 2.756466 | 0.000000 |          |          |   |   |     |          |  |  |  |  |     |          |          |  |  |  |     |          |          |          |  |  |      |          |          |          |          |  |      |          |          |          |          |          |     |          |          |          |          |          |      |          |          |          |          |          |     |          |          |          |          |          |      |          |          |          |          |          |       |          |          |          |          |          |  |   |   |   |   |    |     |          |  |  |  |  |      |          |          |  |  |  |     |          |          |          |  |  |      |          |          |          |          |  |       |          |          |          |          |          |
| 4 Co                                                                                                                           | 3.157485                                                                                                                                                                                                                                                                                                                                                                                                                                                                                                                                                                                                                                                                                                                                                                                                                                                                                                                                                                                                                                                                                                                                                                                                                                                                                                                                                                                                                                                                                                                                                                                                                                                                                                                           | 3.420232 | 3.559724 | 0.000000 |          |   |   |     |          |  |  |  |  |     |          |          |  |  |  |     |          |          |          |  |  |      |          |          |          |          |  |      |          |          |          |          |          |     |          |          |          |          |          |      |          |          |          |          |          |     |          |          |          |          |          |      |          |          |          |          |          |       |          |          |          |          |          |  |   |   |   |   |    |     |          |  |  |  |  |      |          |          |  |  |  |     |          |          |          |  |  |      |          |          |          |          |  |       |          |          |          |          |          |
| 5 B                                                                                                                            | 2.934827                                                                                                                                                                                                                                                                                                                                                                                                                                                                                                                                                                                                                                                                                                                                                                                                                                                                                                                                                                                                                                                                                                                                                                                                                                                                                                                                                                                                                                                                                                                                                                                                                                                                                                                           | 2.822205 | 1.826778 | 2.125094 | 0.000000 |   |   |     |          |  |  |  |  |     |          |          |  |  |  |     |          |          |          |  |  |      |          |          |          |          |  |      |          |          |          |          |          |     |          |          |          |          |          |      |          |          |          |          |          |     |          |          |          |          |          |      |          |          |          |          |          |       |          |          |          |          |          |  |   |   |   |   |    |     |          |  |  |  |  |      |          |          |  |  |  |     |          |          |          |  |  |      |          |          |          |          |  |       |          |          |          |          |          |
| 6 B                                                                                                                            | 2.849843                                                                                                                                                                                                                                                                                                                                                                                                                                                                                                                                                                                                                                                                                                                                                                                                                                                                                                                                                                                                                                                                                                                                                                                                                                                                                                                                                                                                                                                                                                                                                                                                                                                                                                                           | 1.897019 | 2.968642 | 2.114894 | 1.796760 |   |   |     |          |  |  |  |  |     |          |          |  |  |  |     |          |          |          |  |  |      |          |          |          |          |  |      |          |          |          |          |          |     |          |          |          |          |          |      |          |          |          |          |          |     |          |          |          |          |          |      |          |          |          |          |          |       |          |          |          |          |          |  |   |   |   |   |    |     |          |  |  |  |  |      |          |          |  |  |  |     |          |          |          |  |  |      |          |          |          |          |  |       |          |          |          |          |          |
| 7 B                                                                                                                            | 1.782140                                                                                                                                                                                                                                                                                                                                                                                                                                                                                                                                                                                                                                                                                                                                                                                                                                                                                                                                                                                                                                                                                                                                                                                                                                                                                                                                                                                                                                                                                                                                                                                                                                                                                                                           | 1.701274 | 1.663291 | 4.074043 | 2.830238 |   |   |     |          |  |  |  |  |     |          |          |  |  |  |     |          |          |          |  |  |      |          |          |          |          |  |      |          |          |          |          |          |     |          |          |          |          |          |      |          |          |          |          |          |     |          |          |          |          |          |      |          |          |          |          |          |       |          |          |          |          |          |  |   |   |   |   |    |     |          |  |  |  |  |      |          |          |  |  |  |     |          |          |          |  |  |      |          |          |          |          |  |       |          |          |          |          |          |
| 8 B                                                                                                                            | 2.725181                                                                                                                                                                                                                                                                                                                                                                                                                                                                                                                                                                                                                                                                                                                                                                                                                                                                                                                                                                                                                                                                                                                                                                                                                                                                                                                                                                                                                                                                                                                                                                                                                                                                                                                           | 1.739351 | 1.763675 | 3.352676 | 1.744242 |   |   |     |          |  |  |  |  |     |          |          |  |  |  |     |          |          |          |  |  |      |          |          |          |          |  |      |          |          |          |          |          |     |          |          |          |          |          |      |          |          |          |          |          |     |          |          |          |          |          |      |          |          |          |          |          |       |          |          |          |          |          |  |   |   |   |   |    |     |          |  |  |  |  |      |          |          |  |  |  |     |          |          |          |  |  |      |          |          |          |          |  |       |          |          |          |          |          |
| 9 Se                                                                                                                           | 2.062759                                                                                                                                                                                                                                                                                                                                                                                                                                                                                                                                                                                                                                                                                                                                                                                                                                                                                                                                                                                                                                                                                                                                                                                                                                                                                                                                                                                                                                                                                                                                                                                                                                                                                                                           | 3.308747 | 2.140006 | 2.369389 | 2.134596 |   |   |     |          |  |  |  |  |     |          |          |  |  |  |     |          |          |          |  |  |      |          |          |          |          |  |      |          |          |          |          |          |     |          |          |          |          |          |      |          |          |          |          |          |     |          |          |          |          |          |      |          |          |          |          |          |       |          |          |          |          |          |  |   |   |   |   |    |     |          |  |  |  |  |      |          |          |  |  |  |     |          |          |          |  |  |      |          |          |          |          |  |       |          |          |          |          |          |
| 10 Se                                                                                                                          | 2.161562                                                                                                                                                                                                                                                                                                                                                                                                                                                                                                                                                                                                                                                                                                                                                                                                                                                                                                                                                                                                                                                                                                                                                                                                                                                                                                                                                                                                                                                                                                                                                                                                                                                                                                                           | 2.105319 | 3.880585 | 2.335091 | 3.225871 |   |   |     |          |  |  |  |  |     |          |          |  |  |  |     |          |          |          |  |  |      |          |          |          |          |  |      |          |          |          |          |          |     |          |          |          |          |          |      |          |          |          |          |          |     |          |          |          |          |          |      |          |          |          |          |          |       |          |          |          |          |          |  |   |   |   |   |    |     |          |  |  |  |  |      |          |          |  |  |  |     |          |          |          |  |  |      |          |          |          |          |  |       |          |          |          |          |          |
|                                                                                                                                | 6                                                                                                                                                                                                                                                                                                                                                                                                                                                                                                                                                                                                                                                                                                                                                                                                                                                                                                                                                                                                                                                                                                                                                                                                                                                                                                                                                                                                                                                                                                                                                                                                                                                                                                                                  | 7        | 8        | 9        | 10       |   |   |     |          |  |  |  |  |     |          |          |  |  |  |     |          |          |          |  |  |      |          |          |          |          |  |      |          |          |          |          |          |     |          |          |          |          |          |      |          |          |          |          |          |     |          |          |          |          |          |      |          |          |          |          |          |       |          |          |          |          |          |  |   |   |   |   |    |     |          |  |  |  |  |      |          |          |  |  |  |     |          |          |          |  |  |      |          |          |          |          |  |       |          |          |          |          |          |
| 6 B                                                                                                                            | 0.000000                                                                                                                                                                                                                                                                                                                                                                                                                                                                                                                                                                                                                                                                                                                                                                                                                                                                                                                                                                                                                                                                                                                                                                                                                                                                                                                                                                                                                                                                                                                                                                                                                                                                                                                           |          |          |          |          |   |   |     |          |  |  |  |  |     |          |          |  |  |  |     |          |          |          |  |  |      |          |          |          |          |  |      |          |          |          |          |          |     |          |          |          |          |          |      |          |          |          |          |          |     |          |          |          |          |          |      |          |          |          |          |          |       |          |          |          |          |          |  |   |   |   |   |    |     |          |  |  |  |  |      |          |          |  |  |  |     |          |          |          |  |  |      |          |          |          |          |  |       |          |          |          |          |          |
| 7 B                                                                                                                            | 2.971963                                                                                                                                                                                                                                                                                                                                                                                                                                                                                                                                                                                                                                                                                                                                                                                                                                                                                                                                                                                                                                                                                                                                                                                                                                                                                                                                                                                                                                                                                                                                                                                                                                                                                                                           | 0.000000 |          |          |          |   |   |     |          |  |  |  |  |     |          |          |  |  |  |     |          |          |          |  |  |      |          |          |          |          |  |      |          |          |          |          |          |     |          |          |          |          |          |      |          |          |          |          |          |     |          |          |          |          |          |      |          |          |          |          |          |       |          |          |          |          |          |  |   |   |   |   |    |     |          |  |  |  |  |      |          |          |  |  |  |     |          |          |          |  |  |      |          |          |          |          |  |       |          |          |          |          |          |
| 8 B                                                                                                                            | 1.761654                                                                                                                                                                                                                                                                                                                                                                                                                                                                                                                                                                                                                                                                                                                                                                                                                                                                                                                                                                                                                                                                                                                                                                                                                                                                                                                                                                                                                                                                                                                                                                                                                                                                                                                           | 1.783985 | 0.000000 |          |          |   |   |     |          |  |  |  |  |     |          |          |  |  |  |     |          |          |          |  |  |      |          |          |          |          |  |      |          |          |          |          |          |     |          |          |          |          |          |      |          |          |          |          |          |     |          |          |          |          |          |      |          |          |          |          |          |       |          |          |          |          |          |  |   |   |   |   |    |     |          |  |  |  |  |      |          |          |  |  |  |     |          |          |          |  |  |      |          |          |          |          |  |       |          |          |          |          |          |
| 9 Se                                                                                                                           | 3.125460                                                                                                                                                                                                                                                                                                                                                                                                                                                                                                                                                                                                                                                                                                                                                                                                                                                                                                                                                                                                                                                                                                                                                                                                                                                                                                                                                                                                                                                                                                                                                                                                                                                                                                                           | 2.898511 | 3.114330 | 0.000000 |          |   |   |     |          |  |  |  |  |     |          |          |  |  |  |     |          |          |          |  |  |      |          |          |          |          |  |      |          |          |          |          |          |     |          |          |          |          |          |      |          |          |          |          |          |     |          |          |          |          |          |      |          |          |          |          |          |       |          |          |          |          |          |  |   |   |   |   |    |     |          |  |  |  |  |      |          |          |  |  |  |     |          |          |          |  |  |      |          |          |          |          |  |       |          |          |          |          |          |
| 10 Se                                                                                                                          | 2.101875                                                                                                                                                                                                                                                                                                                                                                                                                                                                                                                                                                                                                                                                                                                                                                                                                                                                                                                                                                                                                                                                                                                                                                                                                                                                                                                                                                                                                                                                                                                                                                                                                                                                                                                           | 3.355603 | 3.245938 | 3.124320 | 0.000000 |   |   |     |          |  |  |  |  |     |          |          |  |  |  |     |          |          |          |  |  |      |          |          |          |          |  |      |          |          |          |          |          |     |          |          |          |          |          |      |          |          |          |          |          |     |          |          |          |          |          |      |          |          |          |          |          |       |          |          |          |          |          |  |   |   |   |   |    |     |          |  |  |  |  |      |          |          |  |  |  |     |          |          |          |  |  |      |          |          |          |          |  |       |          |          |          |          |          |

| 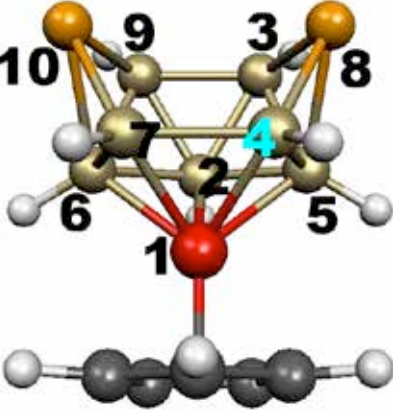 <p>5. -6557.3277724 +14.4 C<sub>s</sub></p>  | <table border="1"> <thead> <tr> <th></th> <th>1</th> <th>2</th> <th>3</th> <th>4</th> <th>5</th> </tr> </thead> <tbody> <tr><td>1 Co</td><td>0.000000</td><td></td><td></td><td></td><td></td></tr> <tr><td>2 B</td><td>2.081486</td><td>0.000000</td><td></td><td></td><td></td></tr> <tr><td>3 B</td><td>3.252677</td><td>1.749200</td><td>0.000000</td><td></td><td></td></tr> <tr><td>4 B</td><td>1.998979</td><td>2.892013</td><td>2.893425</td><td>0.000000</td><td></td></tr> <tr><td>5 B</td><td>2.061976</td><td>1.765728</td><td>1.820631</td><td>1.887223</td><td>0.000000</td></tr> <tr><td>6 B</td><td>2.061939</td><td>1.765750</td><td>2.947642</td><td>3.050708</td><td>3.002652</td></tr> <tr><td>7 B</td><td>1.999000</td><td>2.892107</td><td>3.434651</td><td>1.913387</td><td>3.050766</td></tr> <tr><td>8 Se</td><td>3.506500</td><td>3.162310</td><td>1.995617</td><td>1.973298</td><td>2.088476</td></tr> <tr><td>9 B</td><td>3.252664</td><td>1.749132</td><td>1.789422</td><td>3.434467</td><td>2.947452</td></tr> <tr><td>10 Se</td><td>3.506417</td><td>3.162193</td><td>3.211375</td><td>3.265351</td><td>3.870785</td></tr> <tr> <th></th> <th>6</th> <th>7</th> <th>8</th> <th>9</th> <th>10</th> </tr> <tr><td>6 B</td><td>0.000000</td><td></td><td></td><td></td><td></td></tr> <tr><td>7 B</td><td>1.887303</td><td>0.000000</td><td></td><td></td><td></td></tr> <tr><td>8 Se</td><td>3.870850</td><td>3.265366</td><td>0.000000</td><td></td><td></td></tr> <tr><td>9 B</td><td>1.820810</td><td>2.893574</td><td>3.211230</td><td>0.000000</td><td></td></tr> <tr><td>10 Se</td><td>2.088346</td><td>1.973363</td><td>3.537462</td><td>1.995599</td><td>0.000000</td></tr> </tbody> </table> |          | 1        | 2        | 3        | 4 | 5 | 1 Co | 0.000000 |  |  |  |  | 2 B  | 2.081486 | 0.000000 |  |  |  | 3 B | 3.252677 | 1.749200 | 0.000000 |  |  | 4 B  | 1.998979 | 2.892013 | 2.893425 | 0.000000 |  | 5 B | 2.061976 | 1.765728 | 1.820631 | 1.887223 | 0.000000 | 6 B | 2.061939 | 1.765750 | 2.947642 | 3.050708 | 3.002652 | 7 B | 1.999000 | 2.892107 | 3.434651 | 1.913387 | 3.050766 | 8 Se | 3.506500 | 3.162310 | 1.995617 | 1.973298 | 2.088476 | 9 B | 3.252664 | 1.749132 | 1.789422 | 3.434467 | 2.947452 | 10 Se | 3.506417 | 3.162193 | 3.211375 | 3.265351 | 3.870785 |  | 6 | 7 | 8 | 9 | 10 | 6 B | 0.000000 |  |  |  |  | 7 B | 1.887303 | 0.000000 |  |  |  | 8 Se | 3.870850 | 3.265366 | 0.000000 |  |  | 9 B | 1.820810 | 2.893574 | 3.211230 | 0.000000 |  | 10 Se | 2.088346 | 1.973363 | 3.537462 | 1.995599 | 0.000000 |
|--------------------------------------------------------------------------------------------------------------------------------|------------------------------------------------------------------------------------------------------------------------------------------------------------------------------------------------------------------------------------------------------------------------------------------------------------------------------------------------------------------------------------------------------------------------------------------------------------------------------------------------------------------------------------------------------------------------------------------------------------------------------------------------------------------------------------------------------------------------------------------------------------------------------------------------------------------------------------------------------------------------------------------------------------------------------------------------------------------------------------------------------------------------------------------------------------------------------------------------------------------------------------------------------------------------------------------------------------------------------------------------------------------------------------------------------------------------------------------------------------------------------------------------------------------------------------------------------------------------------------------------------------------------------------------------------------------------------------------------------------------------------------------------------------------------------------------------------------------------------------|----------|----------|----------|----------|---|---|------|----------|--|--|--|--|------|----------|----------|--|--|--|-----|----------|----------|----------|--|--|------|----------|----------|----------|----------|--|-----|----------|----------|----------|----------|----------|-----|----------|----------|----------|----------|----------|-----|----------|----------|----------|----------|----------|------|----------|----------|----------|----------|----------|-----|----------|----------|----------|----------|----------|-------|----------|----------|----------|----------|----------|--|---|---|---|---|----|-----|----------|--|--|--|--|-----|----------|----------|--|--|--|------|----------|----------|----------|--|--|-----|----------|----------|----------|----------|--|-------|----------|----------|----------|----------|----------|
|                                                                                                                                | 1                                                                                                                                                                                                                                                                                                                                                                                                                                                                                                                                                                                                                                                                                                                                                                                                                                                                                                                                                                                                                                                                                                                                                                                                                                                                                                                                                                                                                                                                                                                                                                                                                                                                                                                                  | 2        | 3        | 4        | 5        |   |   |      |          |  |  |  |  |      |          |          |  |  |  |     |          |          |          |  |  |      |          |          |          |          |  |     |          |          |          |          |          |     |          |          |          |          |          |     |          |          |          |          |          |      |          |          |          |          |          |     |          |          |          |          |          |       |          |          |          |          |          |  |   |   |   |   |    |     |          |  |  |  |  |     |          |          |  |  |  |      |          |          |          |  |  |     |          |          |          |          |  |       |          |          |          |          |          |
| 1 Co                                                                                                                           | 0.000000                                                                                                                                                                                                                                                                                                                                                                                                                                                                                                                                                                                                                                                                                                                                                                                                                                                                                                                                                                                                                                                                                                                                                                                                                                                                                                                                                                                                                                                                                                                                                                                                                                                                                                                           |          |          |          |          |   |   |      |          |  |  |  |  |      |          |          |  |  |  |     |          |          |          |  |  |      |          |          |          |          |  |     |          |          |          |          |          |     |          |          |          |          |          |     |          |          |          |          |          |      |          |          |          |          |          |     |          |          |          |          |          |       |          |          |          |          |          |  |   |   |   |   |    |     |          |  |  |  |  |     |          |          |  |  |  |      |          |          |          |  |  |     |          |          |          |          |  |       |          |          |          |          |          |
| 2 B                                                                                                                            | 2.081486                                                                                                                                                                                                                                                                                                                                                                                                                                                                                                                                                                                                                                                                                                                                                                                                                                                                                                                                                                                                                                                                                                                                                                                                                                                                                                                                                                                                                                                                                                                                                                                                                                                                                                                           | 0.000000 |          |          |          |   |   |      |          |  |  |  |  |      |          |          |  |  |  |     |          |          |          |  |  |      |          |          |          |          |  |     |          |          |          |          |          |     |          |          |          |          |          |     |          |          |          |          |          |      |          |          |          |          |          |     |          |          |          |          |          |       |          |          |          |          |          |  |   |   |   |   |    |     |          |  |  |  |  |     |          |          |  |  |  |      |          |          |          |  |  |     |          |          |          |          |  |       |          |          |          |          |          |
| 3 B                                                                                                                            | 3.252677                                                                                                                                                                                                                                                                                                                                                                                                                                                                                                                                                                                                                                                                                                                                                                                                                                                                                                                                                                                                                                                                                                                                                                                                                                                                                                                                                                                                                                                                                                                                                                                                                                                                                                                           | 1.749200 | 0.000000 |          |          |   |   |      |          |  |  |  |  |      |          |          |  |  |  |     |          |          |          |  |  |      |          |          |          |          |  |     |          |          |          |          |          |     |          |          |          |          |          |     |          |          |          |          |          |      |          |          |          |          |          |     |          |          |          |          |          |       |          |          |          |          |          |  |   |   |   |   |    |     |          |  |  |  |  |     |          |          |  |  |  |      |          |          |          |  |  |     |          |          |          |          |  |       |          |          |          |          |          |
| 4 B                                                                                                                            | 1.998979                                                                                                                                                                                                                                                                                                                                                                                                                                                                                                                                                                                                                                                                                                                                                                                                                                                                                                                                                                                                                                                                                                                                                                                                                                                                                                                                                                                                                                                                                                                                                                                                                                                                                                                           | 2.892013 | 2.893425 | 0.000000 |          |   |   |      |          |  |  |  |  |      |          |          |  |  |  |     |          |          |          |  |  |      |          |          |          |          |  |     |          |          |          |          |          |     |          |          |          |          |          |     |          |          |          |          |          |      |          |          |          |          |          |     |          |          |          |          |          |       |          |          |          |          |          |  |   |   |   |   |    |     |          |  |  |  |  |     |          |          |  |  |  |      |          |          |          |  |  |     |          |          |          |          |  |       |          |          |          |          |          |
| 5 B                                                                                                                            | 2.061976                                                                                                                                                                                                                                                                                                                                                                                                                                                                                                                                                                                                                                                                                                                                                                                                                                                                                                                                                                                                                                                                                                                                                                                                                                                                                                                                                                                                                                                                                                                                                                                                                                                                                                                           | 1.765728 | 1.820631 | 1.887223 | 0.000000 |   |   |      |          |  |  |  |  |      |          |          |  |  |  |     |          |          |          |  |  |      |          |          |          |          |  |     |          |          |          |          |          |     |          |          |          |          |          |     |          |          |          |          |          |      |          |          |          |          |          |     |          |          |          |          |          |       |          |          |          |          |          |  |   |   |   |   |    |     |          |  |  |  |  |     |          |          |  |  |  |      |          |          |          |  |  |     |          |          |          |          |  |       |          |          |          |          |          |
| 6 B                                                                                                                            | 2.061939                                                                                                                                                                                                                                                                                                                                                                                                                                                                                                                                                                                                                                                                                                                                                                                                                                                                                                                                                                                                                                                                                                                                                                                                                                                                                                                                                                                                                                                                                                                                                                                                                                                                                                                           | 1.765750 | 2.947642 | 3.050708 | 3.002652 |   |   |      |          |  |  |  |  |      |          |          |  |  |  |     |          |          |          |  |  |      |          |          |          |          |  |     |          |          |          |          |          |     |          |          |          |          |          |     |          |          |          |          |          |      |          |          |          |          |          |     |          |          |          |          |          |       |          |          |          |          |          |  |   |   |   |   |    |     |          |  |  |  |  |     |          |          |  |  |  |      |          |          |          |  |  |     |          |          |          |          |  |       |          |          |          |          |          |
| 7 B                                                                                                                            | 1.999000                                                                                                                                                                                                                                                                                                                                                                                                                                                                                                                                                                                                                                                                                                                                                                                                                                                                                                                                                                                                                                                                                                                                                                                                                                                                                                                                                                                                                                                                                                                                                                                                                                                                                                                           | 2.892107 | 3.434651 | 1.913387 | 3.050766 |   |   |      |          |  |  |  |  |      |          |          |  |  |  |     |          |          |          |  |  |      |          |          |          |          |  |     |          |          |          |          |          |     |          |          |          |          |          |     |          |          |          |          |          |      |          |          |          |          |          |     |          |          |          |          |          |       |          |          |          |          |          |  |   |   |   |   |    |     |          |  |  |  |  |     |          |          |  |  |  |      |          |          |          |  |  |     |          |          |          |          |  |       |          |          |          |          |          |
| 8 Se                                                                                                                           | 3.506500                                                                                                                                                                                                                                                                                                                                                                                                                                                                                                                                                                                                                                                                                                                                                                                                                                                                                                                                                                                                                                                                                                                                                                                                                                                                                                                                                                                                                                                                                                                                                                                                                                                                                                                           | 3.162310 | 1.995617 | 1.973298 | 2.088476 |   |   |      |          |  |  |  |  |      |          |          |  |  |  |     |          |          |          |  |  |      |          |          |          |          |  |     |          |          |          |          |          |     |          |          |          |          |          |     |          |          |          |          |          |      |          |          |          |          |          |     |          |          |          |          |          |       |          |          |          |          |          |  |   |   |   |   |    |     |          |  |  |  |  |     |          |          |  |  |  |      |          |          |          |  |  |     |          |          |          |          |  |       |          |          |          |          |          |
| 9 B                                                                                                                            | 3.252664                                                                                                                                                                                                                                                                                                                                                                                                                                                                                                                                                                                                                                                                                                                                                                                                                                                                                                                                                                                                                                                                                                                                                                                                                                                                                                                                                                                                                                                                                                                                                                                                                                                                                                                           | 1.749132 | 1.789422 | 3.434467 | 2.947452 |   |   |      |          |  |  |  |  |      |          |          |  |  |  |     |          |          |          |  |  |      |          |          |          |          |  |     |          |          |          |          |          |     |          |          |          |          |          |     |          |          |          |          |          |      |          |          |          |          |          |     |          |          |          |          |          |       |          |          |          |          |          |  |   |   |   |   |    |     |          |  |  |  |  |     |          |          |  |  |  |      |          |          |          |  |  |     |          |          |          |          |  |       |          |          |          |          |          |
| 10 Se                                                                                                                          | 3.506417                                                                                                                                                                                                                                                                                                                                                                                                                                                                                                                                                                                                                                                                                                                                                                                                                                                                                                                                                                                                                                                                                                                                                                                                                                                                                                                                                                                                                                                                                                                                                                                                                                                                                                                           | 3.162193 | 3.211375 | 3.265351 | 3.870785 |   |   |      |          |  |  |  |  |      |          |          |  |  |  |     |          |          |          |  |  |      |          |          |          |          |  |     |          |          |          |          |          |     |          |          |          |          |          |     |          |          |          |          |          |      |          |          |          |          |          |     |          |          |          |          |          |       |          |          |          |          |          |  |   |   |   |   |    |     |          |  |  |  |  |     |          |          |  |  |  |      |          |          |          |  |  |     |          |          |          |          |  |       |          |          |          |          |          |
|                                                                                                                                | 6                                                                                                                                                                                                                                                                                                                                                                                                                                                                                                                                                                                                                                                                                                                                                                                                                                                                                                                                                                                                                                                                                                                                                                                                                                                                                                                                                                                                                                                                                                                                                                                                                                                                                                                                  | 7        | 8        | 9        | 10       |   |   |      |          |  |  |  |  |      |          |          |  |  |  |     |          |          |          |  |  |      |          |          |          |          |  |     |          |          |          |          |          |     |          |          |          |          |          |     |          |          |          |          |          |      |          |          |          |          |          |     |          |          |          |          |          |       |          |          |          |          |          |  |   |   |   |   |    |     |          |  |  |  |  |     |          |          |  |  |  |      |          |          |          |  |  |     |          |          |          |          |  |       |          |          |          |          |          |
| 6 B                                                                                                                            | 0.000000                                                                                                                                                                                                                                                                                                                                                                                                                                                                                                                                                                                                                                                                                                                                                                                                                                                                                                                                                                                                                                                                                                                                                                                                                                                                                                                                                                                                                                                                                                                                                                                                                                                                                                                           |          |          |          |          |   |   |      |          |  |  |  |  |      |          |          |  |  |  |     |          |          |          |  |  |      |          |          |          |          |  |     |          |          |          |          |          |     |          |          |          |          |          |     |          |          |          |          |          |      |          |          |          |          |          |     |          |          |          |          |          |       |          |          |          |          |          |  |   |   |   |   |    |     |          |  |  |  |  |     |          |          |  |  |  |      |          |          |          |  |  |     |          |          |          |          |  |       |          |          |          |          |          |
| 7 B                                                                                                                            | 1.887303                                                                                                                                                                                                                                                                                                                                                                                                                                                                                                                                                                                                                                                                                                                                                                                                                                                                                                                                                                                                                                                                                                                                                                                                                                                                                                                                                                                                                                                                                                                                                                                                                                                                                                                           | 0.000000 |          |          |          |   |   |      |          |  |  |  |  |      |          |          |  |  |  |     |          |          |          |  |  |      |          |          |          |          |  |     |          |          |          |          |          |     |          |          |          |          |          |     |          |          |          |          |          |      |          |          |          |          |          |     |          |          |          |          |          |       |          |          |          |          |          |  |   |   |   |   |    |     |          |  |  |  |  |     |          |          |  |  |  |      |          |          |          |  |  |     |          |          |          |          |  |       |          |          |          |          |          |
| 8 Se                                                                                                                           | 3.870850                                                                                                                                                                                                                                                                                                                                                                                                                                                                                                                                                                                                                                                                                                                                                                                                                                                                                                                                                                                                                                                                                                                                                                                                                                                                                                                                                                                                                                                                                                                                                                                                                                                                                                                           | 3.265366 | 0.000000 |          |          |   |   |      |          |  |  |  |  |      |          |          |  |  |  |     |          |          |          |  |  |      |          |          |          |          |  |     |          |          |          |          |          |     |          |          |          |          |          |     |          |          |          |          |          |      |          |          |          |          |          |     |          |          |          |          |          |       |          |          |          |          |          |  |   |   |   |   |    |     |          |  |  |  |  |     |          |          |  |  |  |      |          |          |          |  |  |     |          |          |          |          |  |       |          |          |          |          |          |
| 9 B                                                                                                                            | 1.820810                                                                                                                                                                                                                                                                                                                                                                                                                                                                                                                                                                                                                                                                                                                                                                                                                                                                                                                                                                                                                                                                                                                                                                                                                                                                                                                                                                                                                                                                                                                                                                                                                                                                                                                           | 2.893574 | 3.211230 | 0.000000 |          |   |   |      |          |  |  |  |  |      |          |          |  |  |  |     |          |          |          |  |  |      |          |          |          |          |  |     |          |          |          |          |          |     |          |          |          |          |          |     |          |          |          |          |          |      |          |          |          |          |          |     |          |          |          |          |          |       |          |          |          |          |          |  |   |   |   |   |    |     |          |  |  |  |  |     |          |          |  |  |  |      |          |          |          |  |  |     |          |          |          |          |  |       |          |          |          |          |          |
| 10 Se                                                                                                                          | 2.088346                                                                                                                                                                                                                                                                                                                                                                                                                                                                                                                                                                                                                                                                                                                                                                                                                                                                                                                                                                                                                                                                                                                                                                                                                                                                                                                                                                                                                                                                                                                                                                                                                                                                                                                           | 1.973363 | 3.537462 | 1.995599 | 0.000000 |   |   |      |          |  |  |  |  |      |          |          |  |  |  |     |          |          |          |  |  |      |          |          |          |          |  |     |          |          |          |          |          |     |          |          |          |          |          |     |          |          |          |          |          |      |          |          |          |          |          |     |          |          |          |          |          |       |          |          |          |          |          |  |   |   |   |   |    |     |          |  |  |  |  |     |          |          |  |  |  |      |          |          |          |  |  |     |          |          |          |          |  |       |          |          |          |          |          |
|  <p>6. -6557.3271524 +14.7 C<sub>1</sub></p> | <table border="1"> <thead> <tr> <th></th> <th>1</th> <th>2</th> <th>3</th> <th>4</th> <th>5</th> </tr> </thead> <tbody> <tr><td>1 B</td><td>0.000000</td><td></td><td></td><td></td><td></td></tr> <tr><td>2 Co</td><td>2.091241</td><td>0.000000</td><td></td><td></td><td></td></tr> <tr><td>3 B</td><td>1.733049</td><td>3.283902</td><td>0.000000</td><td></td><td></td></tr> <tr><td>4 Se</td><td>3.317867</td><td>3.608104</td><td>3.567945</td><td>0.000000</td><td></td></tr> <tr><td>5 B</td><td>2.645439</td><td>3.280650</td><td>1.614950</td><td>2.950924</td><td>0.000000</td></tr> <tr><td>6 B</td><td>3.013473</td><td>2.073265</td><td>3.731507</td><td>2.023315</td><td>3.026933</td></tr> <tr><td>7 B</td><td>1.795353</td><td>2.141048</td><td>1.676927</td><td>3.944884</td><td>1.924244</td></tr> <tr><td>8 Se</td><td>3.214821</td><td>2.360322</td><td>3.175355</td><td>3.275325</td><td>2.058586</td></tr> <tr><td>9 B</td><td>1.826939</td><td>3.222304</td><td>1.726844</td><td>2.046508</td><td>2.018497</td></tr> <tr><td>10 B</td><td>1.764594</td><td>2.085900</td><td>2.980302</td><td>2.081769</td><td>3.126660</td></tr> <tr> <th></th> <th>6</th> <th>7</th> <th>8</th> <th>9</th> <th>10</th> </tr> <tr><td>6 B</td><td>0.000000</td><td></td><td></td><td></td><td></td></tr> <tr><td>7 B</td><td>3.185319</td><td>0.000000</td><td></td><td></td><td></td></tr> <tr><td>8 Se</td><td>2.061483</td><td>2.185047</td><td>0.000000</td><td></td><td></td></tr> <tr><td>9 B</td><td>2.871345</td><td>2.698035</td><td>3.272780</td><td>0.000000</td><td></td></tr> <tr><td>10 B</td><td>1.855181</td><td>2.969048</td><td>3.173728</td><td>1.876730</td><td>0.000000</td></tr> </tbody> </table>  |          | 1        | 2        | 3        | 4 | 5 | 1 B  | 0.000000 |  |  |  |  | 2 Co | 2.091241 | 0.000000 |  |  |  | 3 B | 1.733049 | 3.283902 | 0.000000 |  |  | 4 Se | 3.317867 | 3.608104 | 3.567945 | 0.000000 |  | 5 B | 2.645439 | 3.280650 | 1.614950 | 2.950924 | 0.000000 | 6 B | 3.013473 | 2.073265 | 3.731507 | 2.023315 | 3.026933 | 7 B | 1.795353 | 2.141048 | 1.676927 | 3.944884 | 1.924244 | 8 Se | 3.214821 | 2.360322 | 3.175355 | 3.275325 | 2.058586 | 9 B | 1.826939 | 3.222304 | 1.726844 | 2.046508 | 2.018497 | 10 B  | 1.764594 | 2.085900 | 2.980302 | 2.081769 | 3.126660 |  | 6 | 7 | 8 | 9 | 10 | 6 B | 0.000000 |  |  |  |  | 7 B | 3.185319 | 0.000000 |  |  |  | 8 Se | 2.061483 | 2.185047 | 0.000000 |  |  | 9 B | 2.871345 | 2.698035 | 3.272780 | 0.000000 |  | 10 B  | 1.855181 | 2.969048 | 3.173728 | 1.876730 | 0.000000 |
|                                                                                                                                | 1                                                                                                                                                                                                                                                                                                                                                                                                                                                                                                                                                                                                                                                                                                                                                                                                                                                                                                                                                                                                                                                                                                                                                                                                                                                                                                                                                                                                                                                                                                                                                                                                                                                                                                                                  | 2        | 3        | 4        | 5        |   |   |      |          |  |  |  |  |      |          |          |  |  |  |     |          |          |          |  |  |      |          |          |          |          |  |     |          |          |          |          |          |     |          |          |          |          |          |     |          |          |          |          |          |      |          |          |          |          |          |     |          |          |          |          |          |       |          |          |          |          |          |  |   |   |   |   |    |     |          |  |  |  |  |     |          |          |  |  |  |      |          |          |          |  |  |     |          |          |          |          |  |       |          |          |          |          |          |
| 1 B                                                                                                                            | 0.000000                                                                                                                                                                                                                                                                                                                                                                                                                                                                                                                                                                                                                                                                                                                                                                                                                                                                                                                                                                                                                                                                                                                                                                                                                                                                                                                                                                                                                                                                                                                                                                                                                                                                                                                           |          |          |          |          |   |   |      |          |  |  |  |  |      |          |          |  |  |  |     |          |          |          |  |  |      |          |          |          |          |  |     |          |          |          |          |          |     |          |          |          |          |          |     |          |          |          |          |          |      |          |          |          |          |          |     |          |          |          |          |          |       |          |          |          |          |          |  |   |   |   |   |    |     |          |  |  |  |  |     |          |          |  |  |  |      |          |          |          |  |  |     |          |          |          |          |  |       |          |          |          |          |          |
| 2 Co                                                                                                                           | 2.091241                                                                                                                                                                                                                                                                                                                                                                                                                                                                                                                                                                                                                                                                                                                                                                                                                                                                                                                                                                                                                                                                                                                                                                                                                                                                                                                                                                                                                                                                                                                                                                                                                                                                                                                           | 0.000000 |          |          |          |   |   |      |          |  |  |  |  |      |          |          |  |  |  |     |          |          |          |  |  |      |          |          |          |          |  |     |          |          |          |          |          |     |          |          |          |          |          |     |          |          |          |          |          |      |          |          |          |          |          |     |          |          |          |          |          |       |          |          |          |          |          |  |   |   |   |   |    |     |          |  |  |  |  |     |          |          |  |  |  |      |          |          |          |  |  |     |          |          |          |          |  |       |          |          |          |          |          |
| 3 B                                                                                                                            | 1.733049                                                                                                                                                                                                                                                                                                                                                                                                                                                                                                                                                                                                                                                                                                                                                                                                                                                                                                                                                                                                                                                                                                                                                                                                                                                                                                                                                                                                                                                                                                                                                                                                                                                                                                                           | 3.283902 | 0.000000 |          |          |   |   |      |          |  |  |  |  |      |          |          |  |  |  |     |          |          |          |  |  |      |          |          |          |          |  |     |          |          |          |          |          |     |          |          |          |          |          |     |          |          |          |          |          |      |          |          |          |          |          |     |          |          |          |          |          |       |          |          |          |          |          |  |   |   |   |   |    |     |          |  |  |  |  |     |          |          |  |  |  |      |          |          |          |  |  |     |          |          |          |          |  |       |          |          |          |          |          |
| 4 Se                                                                                                                           | 3.317867                                                                                                                                                                                                                                                                                                                                                                                                                                                                                                                                                                                                                                                                                                                                                                                                                                                                                                                                                                                                                                                                                                                                                                                                                                                                                                                                                                                                                                                                                                                                                                                                                                                                                                                           | 3.608104 | 3.567945 | 0.000000 |          |   |   |      |          |  |  |  |  |      |          |          |  |  |  |     |          |          |          |  |  |      |          |          |          |          |  |     |          |          |          |          |          |     |          |          |          |          |          |     |          |          |          |          |          |      |          |          |          |          |          |     |          |          |          |          |          |       |          |          |          |          |          |  |   |   |   |   |    |     |          |  |  |  |  |     |          |          |  |  |  |      |          |          |          |  |  |     |          |          |          |          |  |       |          |          |          |          |          |
| 5 B                                                                                                                            | 2.645439                                                                                                                                                                                                                                                                                                                                                                                                                                                                                                                                                                                                                                                                                                                                                                                                                                                                                                                                                                                                                                                                                                                                                                                                                                                                                                                                                                                                                                                                                                                                                                                                                                                                                                                           | 3.280650 | 1.614950 | 2.950924 | 0.000000 |   |   |      |          |  |  |  |  |      |          |          |  |  |  |     |          |          |          |  |  |      |          |          |          |          |  |     |          |          |          |          |          |     |          |          |          |          |          |     |          |          |          |          |          |      |          |          |          |          |          |     |          |          |          |          |          |       |          |          |          |          |          |  |   |   |   |   |    |     |          |  |  |  |  |     |          |          |  |  |  |      |          |          |          |  |  |     |          |          |          |          |  |       |          |          |          |          |          |
| 6 B                                                                                                                            | 3.013473                                                                                                                                                                                                                                                                                                                                                                                                                                                                                                                                                                                                                                                                                                                                                                                                                                                                                                                                                                                                                                                                                                                                                                                                                                                                                                                                                                                                                                                                                                                                                                                                                                                                                                                           | 2.073265 | 3.731507 | 2.023315 | 3.026933 |   |   |      |          |  |  |  |  |      |          |          |  |  |  |     |          |          |          |  |  |      |          |          |          |          |  |     |          |          |          |          |          |     |          |          |          |          |          |     |          |          |          |          |          |      |          |          |          |          |          |     |          |          |          |          |          |       |          |          |          |          |          |  |   |   |   |   |    |     |          |  |  |  |  |     |          |          |  |  |  |      |          |          |          |  |  |     |          |          |          |          |  |       |          |          |          |          |          |
| 7 B                                                                                                                            | 1.795353                                                                                                                                                                                                                                                                                                                                                                                                                                                                                                                                                                                                                                                                                                                                                                                                                                                                                                                                                                                                                                                                                                                                                                                                                                                                                                                                                                                                                                                                                                                                                                                                                                                                                                                           | 2.141048 | 1.676927 | 3.944884 | 1.924244 |   |   |      |          |  |  |  |  |      |          |          |  |  |  |     |          |          |          |  |  |      |          |          |          |          |  |     |          |          |          |          |          |     |          |          |          |          |          |     |          |          |          |          |          |      |          |          |          |          |          |     |          |          |          |          |          |       |          |          |          |          |          |  |   |   |   |   |    |     |          |  |  |  |  |     |          |          |  |  |  |      |          |          |          |  |  |     |          |          |          |          |  |       |          |          |          |          |          |
| 8 Se                                                                                                                           | 3.214821                                                                                                                                                                                                                                                                                                                                                                                                                                                                                                                                                                                                                                                                                                                                                                                                                                                                                                                                                                                                                                                                                                                                                                                                                                                                                                                                                                                                                                                                                                                                                                                                                                                                                                                           | 2.360322 | 3.175355 | 3.275325 | 2.058586 |   |   |      |          |  |  |  |  |      |          |          |  |  |  |     |          |          |          |  |  |      |          |          |          |          |  |     |          |          |          |          |          |     |          |          |          |          |          |     |          |          |          |          |          |      |          |          |          |          |          |     |          |          |          |          |          |       |          |          |          |          |          |  |   |   |   |   |    |     |          |  |  |  |  |     |          |          |  |  |  |      |          |          |          |  |  |     |          |          |          |          |  |       |          |          |          |          |          |
| 9 B                                                                                                                            | 1.826939                                                                                                                                                                                                                                                                                                                                                                                                                                                                                                                                                                                                                                                                                                                                                                                                                                                                                                                                                                                                                                                                                                                                                                                                                                                                                                                                                                                                                                                                                                                                                                                                                                                                                                                           | 3.222304 | 1.726844 | 2.046508 | 2.018497 |   |   |      |          |  |  |  |  |      |          |          |  |  |  |     |          |          |          |  |  |      |          |          |          |          |  |     |          |          |          |          |          |     |          |          |          |          |          |     |          |          |          |          |          |      |          |          |          |          |          |     |          |          |          |          |          |       |          |          |          |          |          |  |   |   |   |   |    |     |          |  |  |  |  |     |          |          |  |  |  |      |          |          |          |  |  |     |          |          |          |          |  |       |          |          |          |          |          |
| 10 B                                                                                                                           | 1.764594                                                                                                                                                                                                                                                                                                                                                                                                                                                                                                                                                                                                                                                                                                                                                                                                                                                                                                                                                                                                                                                                                                                                                                                                                                                                                                                                                                                                                                                                                                                                                                                                                                                                                                                           | 2.085900 | 2.980302 | 2.081769 | 3.126660 |   |   |      |          |  |  |  |  |      |          |          |  |  |  |     |          |          |          |  |  |      |          |          |          |          |  |     |          |          |          |          |          |     |          |          |          |          |          |     |          |          |          |          |          |      |          |          |          |          |          |     |          |          |          |          |          |       |          |          |          |          |          |  |   |   |   |   |    |     |          |  |  |  |  |     |          |          |  |  |  |      |          |          |          |  |  |     |          |          |          |          |  |       |          |          |          |          |          |
|                                                                                                                                | 6                                                                                                                                                                                                                                                                                                                                                                                                                                                                                                                                                                                                                                                                                                                                                                                                                                                                                                                                                                                                                                                                                                                                                                                                                                                                                                                                                                                                                                                                                                                                                                                                                                                                                                                                  | 7        | 8        | 9        | 10       |   |   |      |          |  |  |  |  |      |          |          |  |  |  |     |          |          |          |  |  |      |          |          |          |          |  |     |          |          |          |          |          |     |          |          |          |          |          |     |          |          |          |          |          |      |          |          |          |          |          |     |          |          |          |          |          |       |          |          |          |          |          |  |   |   |   |   |    |     |          |  |  |  |  |     |          |          |  |  |  |      |          |          |          |  |  |     |          |          |          |          |  |       |          |          |          |          |          |
| 6 B                                                                                                                            | 0.000000                                                                                                                                                                                                                                                                                                                                                                                                                                                                                                                                                                                                                                                                                                                                                                                                                                                                                                                                                                                                                                                                                                                                                                                                                                                                                                                                                                                                                                                                                                                                                                                                                                                                                                                           |          |          |          |          |   |   |      |          |  |  |  |  |      |          |          |  |  |  |     |          |          |          |  |  |      |          |          |          |          |  |     |          |          |          |          |          |     |          |          |          |          |          |     |          |          |          |          |          |      |          |          |          |          |          |     |          |          |          |          |          |       |          |          |          |          |          |  |   |   |   |   |    |     |          |  |  |  |  |     |          |          |  |  |  |      |          |          |          |  |  |     |          |          |          |          |  |       |          |          |          |          |          |
| 7 B                                                                                                                            | 3.185319                                                                                                                                                                                                                                                                                                                                                                                                                                                                                                                                                                                                                                                                                                                                                                                                                                                                                                                                                                                                                                                                                                                                                                                                                                                                                                                                                                                                                                                                                                                                                                                                                                                                                                                           | 0.000000 |          |          |          |   |   |      |          |  |  |  |  |      |          |          |  |  |  |     |          |          |          |  |  |      |          |          |          |          |  |     |          |          |          |          |          |     |          |          |          |          |          |     |          |          |          |          |          |      |          |          |          |          |          |     |          |          |          |          |          |       |          |          |          |          |          |  |   |   |   |   |    |     |          |  |  |  |  |     |          |          |  |  |  |      |          |          |          |  |  |     |          |          |          |          |  |       |          |          |          |          |          |
| 8 Se                                                                                                                           | 2.061483                                                                                                                                                                                                                                                                                                                                                                                                                                                                                                                                                                                                                                                                                                                                                                                                                                                                                                                                                                                                                                                                                                                                                                                                                                                                                                                                                                                                                                                                                                                                                                                                                                                                                                                           | 2.185047 | 0.000000 |          |          |   |   |      |          |  |  |  |  |      |          |          |  |  |  |     |          |          |          |  |  |      |          |          |          |          |  |     |          |          |          |          |          |     |          |          |          |          |          |     |          |          |          |          |          |      |          |          |          |          |          |     |          |          |          |          |          |       |          |          |          |          |          |  |   |   |   |   |    |     |          |  |  |  |  |     |          |          |  |  |  |      |          |          |          |  |  |     |          |          |          |          |  |       |          |          |          |          |          |
| 9 B                                                                                                                            | 2.871345                                                                                                                                                                                                                                                                                                                                                                                                                                                                                                                                                                                                                                                                                                                                                                                                                                                                                                                                                                                                                                                                                                                                                                                                                                                                                                                                                                                                                                                                                                                                                                                                                                                                                                                           | 2.698035 | 3.272780 | 0.000000 |          |   |   |      |          |  |  |  |  |      |          |          |  |  |  |     |          |          |          |  |  |      |          |          |          |          |  |     |          |          |          |          |          |     |          |          |          |          |          |     |          |          |          |          |          |      |          |          |          |          |          |     |          |          |          |          |          |       |          |          |          |          |          |  |   |   |   |   |    |     |          |  |  |  |  |     |          |          |  |  |  |      |          |          |          |  |  |     |          |          |          |          |  |       |          |          |          |          |          |
| 10 B                                                                                                                           | 1.855181                                                                                                                                                                                                                                                                                                                                                                                                                                                                                                                                                                                                                                                                                                                                                                                                                                                                                                                                                                                                                                                                                                                                                                                                                                                                                                                                                                                                                                                                                                                                                                                                                                                                                                                           | 2.969048 | 3.173728 | 1.876730 | 0.000000 |   |   |      |          |  |  |  |  |      |          |          |  |  |  |     |          |          |          |  |  |      |          |          |          |          |  |     |          |          |          |          |          |     |          |          |          |          |          |     |          |          |          |          |          |      |          |          |          |          |          |     |          |          |          |          |          |       |          |          |          |          |          |  |   |   |   |   |    |     |          |  |  |  |  |     |          |          |  |  |  |      |          |          |          |  |  |     |          |          |          |          |  |       |          |          |          |          |          |

| 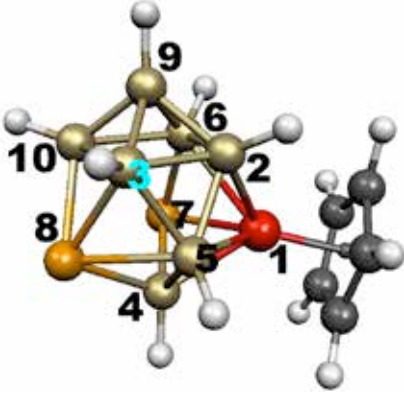 <p>7. -6557.3266373 +15.1 C<sub>1</sub></p>  | <table border="1"> <thead> <tr> <th></th> <th>1</th> <th>2</th> <th>3</th> <th>4</th> <th>5</th> </tr> </thead> <tbody> <tr> <td>1 Co</td> <td>0.000000</td> <td></td> <td></td> <td></td> <td></td> </tr> <tr> <td>2 B</td> <td>2.115577</td> <td>0.000000</td> <td></td> <td></td> <td></td> </tr> <tr> <td>3 B</td> <td>3.375562</td> <td>1.754584</td> <td>0.000000</td> <td></td> <td></td> </tr> <tr> <td>4 B</td> <td>2.044136</td> <td>3.005537</td> <td>3.161664</td> <td>0.000000</td> <td></td> </tr> <tr> <td>5 B</td> <td>2.078160</td> <td>1.747044</td> <td>1.863223</td> <td>1.869546</td> <td>0.000000</td> </tr> <tr> <td>6 B</td> <td>2.217302</td> <td>1.877603</td> <td>2.715887</td> <td>2.848059</td> <td>2.792337</td> </tr> <tr> <td>7 Se</td> <td>2.332609</td> <td>3.387623</td> <td>3.927027</td> <td>2.015227</td> <td>3.272422</td> </tr> <tr> <td>8 Se</td> <td>3.568033</td> <td>3.165301</td> <td>2.116629</td> <td>2.098854</td> <td>2.138429</td> </tr> <tr> <td>9 B</td> <td>3.360707</td> <td>1.706760</td> <td>1.707098</td> <td>3.705866</td> <td>2.887040</td> </tr> <tr> <td>10 B</td> <td>3.607544</td> <td>2.656335</td> <td>1.933255</td> <td>3.051363</td> <td>2.904991</td> </tr> <tr> <th></th> <th>6</th> <th>7</th> <th>8</th> <th>9</th> <th>10</th> </tr> <tr> <td>6 B</td> <td>0.000000</td> <td></td> <td></td> <td></td> <td></td> </tr> <tr> <td>7 Se</td> <td>2.048408</td> <td>0.000000</td> <td></td> <td></td> <td></td> </tr> <tr> <td>8 Se</td> <td>3.269791</td> <td>3.256050</td> <td>0.000000</td> <td></td> <td></td> </tr> <tr> <td>9 B</td> <td>1.715043</td> <td>3.539202</td> <td>3.149662</td> <td>0.000000</td> <td></td> </tr> <tr> <td>10 B</td> <td>2.044879</td> <td>2.925077</td> <td>2.058929</td> <td>1.622943</td> <td>0.000000</td> </tr> </tbody> </table> |          | 1        | 2        | 3        | 4 | 5 | 1 Co | 0.000000 |  |  |  |  | 2 B | 2.115577 | 0.000000 |  |  |  | 3 B | 3.375562 | 1.754584 | 0.000000 |  |  | 4 B  | 2.044136 | 3.005537 | 3.161664 | 0.000000 |  | 5 B  | 2.078160 | 1.747044 | 1.863223 | 1.869546 | 0.000000 | 6 B | 2.217302 | 1.877603 | 2.715887 | 2.848059 | 2.792337 | 7 Se | 2.332609 | 3.387623 | 3.927027 | 2.015227 | 3.272422 | 8 Se | 3.568033 | 3.165301 | 2.116629 | 2.098854 | 2.138429 | 9 B  | 3.360707 | 1.706760 | 1.707098 | 3.705866 | 2.887040 | 10 B | 3.607544 | 2.656335 | 1.933255 | 3.051363 | 2.904991 |  | 6 | 7 | 8 | 9 | 10 | 6 B | 0.000000 |  |  |  |  | 7 Se | 2.048408 | 0.000000 |  |  |  | 8 Se | 3.269791 | 3.256050 | 0.000000 |  |  | 9 B  | 1.715043 | 3.539202 | 3.149662 | 0.000000 |  | 10 B | 2.044879 | 2.925077 | 2.058929 | 1.622943 | 0.000000 |
|--------------------------------------------------------------------------------------------------------------------------------|---------------------------------------------------------------------------------------------------------------------------------------------------------------------------------------------------------------------------------------------------------------------------------------------------------------------------------------------------------------------------------------------------------------------------------------------------------------------------------------------------------------------------------------------------------------------------------------------------------------------------------------------------------------------------------------------------------------------------------------------------------------------------------------------------------------------------------------------------------------------------------------------------------------------------------------------------------------------------------------------------------------------------------------------------------------------------------------------------------------------------------------------------------------------------------------------------------------------------------------------------------------------------------------------------------------------------------------------------------------------------------------------------------------------------------------------------------------------------------------------------------------------------------------------------------------------------------------------------------------------------------------------------------------------------------------------------------------------------------------------------------------------------------------------------------------------------------------------|----------|----------|----------|----------|---|---|------|----------|--|--|--|--|-----|----------|----------|--|--|--|-----|----------|----------|----------|--|--|------|----------|----------|----------|----------|--|------|----------|----------|----------|----------|----------|-----|----------|----------|----------|----------|----------|------|----------|----------|----------|----------|----------|------|----------|----------|----------|----------|----------|------|----------|----------|----------|----------|----------|------|----------|----------|----------|----------|----------|--|---|---|---|---|----|-----|----------|--|--|--|--|------|----------|----------|--|--|--|------|----------|----------|----------|--|--|------|----------|----------|----------|----------|--|------|----------|----------|----------|----------|----------|
|                                                                                                                                | 1                                                                                                                                                                                                                                                                                                                                                                                                                                                                                                                                                                                                                                                                                                                                                                                                                                                                                                                                                                                                                                                                                                                                                                                                                                                                                                                                                                                                                                                                                                                                                                                                                                                                                                                                                                                                                                           | 2        | 3        | 4        | 5        |   |   |      |          |  |  |  |  |     |          |          |  |  |  |     |          |          |          |  |  |      |          |          |          |          |  |      |          |          |          |          |          |     |          |          |          |          |          |      |          |          |          |          |          |      |          |          |          |          |          |      |          |          |          |          |          |      |          |          |          |          |          |  |   |   |   |   |    |     |          |  |  |  |  |      |          |          |  |  |  |      |          |          |          |  |  |      |          |          |          |          |  |      |          |          |          |          |          |
| 1 Co                                                                                                                           | 0.000000                                                                                                                                                                                                                                                                                                                                                                                                                                                                                                                                                                                                                                                                                                                                                                                                                                                                                                                                                                                                                                                                                                                                                                                                                                                                                                                                                                                                                                                                                                                                                                                                                                                                                                                                                                                                                                    |          |          |          |          |   |   |      |          |  |  |  |  |     |          |          |  |  |  |     |          |          |          |  |  |      |          |          |          |          |  |      |          |          |          |          |          |     |          |          |          |          |          |      |          |          |          |          |          |      |          |          |          |          |          |      |          |          |          |          |          |      |          |          |          |          |          |  |   |   |   |   |    |     |          |  |  |  |  |      |          |          |  |  |  |      |          |          |          |  |  |      |          |          |          |          |  |      |          |          |          |          |          |
| 2 B                                                                                                                            | 2.115577                                                                                                                                                                                                                                                                                                                                                                                                                                                                                                                                                                                                                                                                                                                                                                                                                                                                                                                                                                                                                                                                                                                                                                                                                                                                                                                                                                                                                                                                                                                                                                                                                                                                                                                                                                                                                                    | 0.000000 |          |          |          |   |   |      |          |  |  |  |  |     |          |          |  |  |  |     |          |          |          |  |  |      |          |          |          |          |  |      |          |          |          |          |          |     |          |          |          |          |          |      |          |          |          |          |          |      |          |          |          |          |          |      |          |          |          |          |          |      |          |          |          |          |          |  |   |   |   |   |    |     |          |  |  |  |  |      |          |          |  |  |  |      |          |          |          |  |  |      |          |          |          |          |  |      |          |          |          |          |          |
| 3 B                                                                                                                            | 3.375562                                                                                                                                                                                                                                                                                                                                                                                                                                                                                                                                                                                                                                                                                                                                                                                                                                                                                                                                                                                                                                                                                                                                                                                                                                                                                                                                                                                                                                                                                                                                                                                                                                                                                                                                                                                                                                    | 1.754584 | 0.000000 |          |          |   |   |      |          |  |  |  |  |     |          |          |  |  |  |     |          |          |          |  |  |      |          |          |          |          |  |      |          |          |          |          |          |     |          |          |          |          |          |      |          |          |          |          |          |      |          |          |          |          |          |      |          |          |          |          |          |      |          |          |          |          |          |  |   |   |   |   |    |     |          |  |  |  |  |      |          |          |  |  |  |      |          |          |          |  |  |      |          |          |          |          |  |      |          |          |          |          |          |
| 4 B                                                                                                                            | 2.044136                                                                                                                                                                                                                                                                                                                                                                                                                                                                                                                                                                                                                                                                                                                                                                                                                                                                                                                                                                                                                                                                                                                                                                                                                                                                                                                                                                                                                                                                                                                                                                                                                                                                                                                                                                                                                                    | 3.005537 | 3.161664 | 0.000000 |          |   |   |      |          |  |  |  |  |     |          |          |  |  |  |     |          |          |          |  |  |      |          |          |          |          |  |      |          |          |          |          |          |     |          |          |          |          |          |      |          |          |          |          |          |      |          |          |          |          |          |      |          |          |          |          |          |      |          |          |          |          |          |  |   |   |   |   |    |     |          |  |  |  |  |      |          |          |  |  |  |      |          |          |          |  |  |      |          |          |          |          |  |      |          |          |          |          |          |
| 5 B                                                                                                                            | 2.078160                                                                                                                                                                                                                                                                                                                                                                                                                                                                                                                                                                                                                                                                                                                                                                                                                                                                                                                                                                                                                                                                                                                                                                                                                                                                                                                                                                                                                                                                                                                                                                                                                                                                                                                                                                                                                                    | 1.747044 | 1.863223 | 1.869546 | 0.000000 |   |   |      |          |  |  |  |  |     |          |          |  |  |  |     |          |          |          |  |  |      |          |          |          |          |  |      |          |          |          |          |          |     |          |          |          |          |          |      |          |          |          |          |          |      |          |          |          |          |          |      |          |          |          |          |          |      |          |          |          |          |          |  |   |   |   |   |    |     |          |  |  |  |  |      |          |          |  |  |  |      |          |          |          |  |  |      |          |          |          |          |  |      |          |          |          |          |          |
| 6 B                                                                                                                            | 2.217302                                                                                                                                                                                                                                                                                                                                                                                                                                                                                                                                                                                                                                                                                                                                                                                                                                                                                                                                                                                                                                                                                                                                                                                                                                                                                                                                                                                                                                                                                                                                                                                                                                                                                                                                                                                                                                    | 1.877603 | 2.715887 | 2.848059 | 2.792337 |   |   |      |          |  |  |  |  |     |          |          |  |  |  |     |          |          |          |  |  |      |          |          |          |          |  |      |          |          |          |          |          |     |          |          |          |          |          |      |          |          |          |          |          |      |          |          |          |          |          |      |          |          |          |          |          |      |          |          |          |          |          |  |   |   |   |   |    |     |          |  |  |  |  |      |          |          |  |  |  |      |          |          |          |  |  |      |          |          |          |          |  |      |          |          |          |          |          |
| 7 Se                                                                                                                           | 2.332609                                                                                                                                                                                                                                                                                                                                                                                                                                                                                                                                                                                                                                                                                                                                                                                                                                                                                                                                                                                                                                                                                                                                                                                                                                                                                                                                                                                                                                                                                                                                                                                                                                                                                                                                                                                                                                    | 3.387623 | 3.927027 | 2.015227 | 3.272422 |   |   |      |          |  |  |  |  |     |          |          |  |  |  |     |          |          |          |  |  |      |          |          |          |          |  |      |          |          |          |          |          |     |          |          |          |          |          |      |          |          |          |          |          |      |          |          |          |          |          |      |          |          |          |          |          |      |          |          |          |          |          |  |   |   |   |   |    |     |          |  |  |  |  |      |          |          |  |  |  |      |          |          |          |  |  |      |          |          |          |          |  |      |          |          |          |          |          |
| 8 Se                                                                                                                           | 3.568033                                                                                                                                                                                                                                                                                                                                                                                                                                                                                                                                                                                                                                                                                                                                                                                                                                                                                                                                                                                                                                                                                                                                                                                                                                                                                                                                                                                                                                                                                                                                                                                                                                                                                                                                                                                                                                    | 3.165301 | 2.116629 | 2.098854 | 2.138429 |   |   |      |          |  |  |  |  |     |          |          |  |  |  |     |          |          |          |  |  |      |          |          |          |          |  |      |          |          |          |          |          |     |          |          |          |          |          |      |          |          |          |          |          |      |          |          |          |          |          |      |          |          |          |          |          |      |          |          |          |          |          |  |   |   |   |   |    |     |          |  |  |  |  |      |          |          |  |  |  |      |          |          |          |  |  |      |          |          |          |          |  |      |          |          |          |          |          |
| 9 B                                                                                                                            | 3.360707                                                                                                                                                                                                                                                                                                                                                                                                                                                                                                                                                                                                                                                                                                                                                                                                                                                                                                                                                                                                                                                                                                                                                                                                                                                                                                                                                                                                                                                                                                                                                                                                                                                                                                                                                                                                                                    | 1.706760 | 1.707098 | 3.705866 | 2.887040 |   |   |      |          |  |  |  |  |     |          |          |  |  |  |     |          |          |          |  |  |      |          |          |          |          |  |      |          |          |          |          |          |     |          |          |          |          |          |      |          |          |          |          |          |      |          |          |          |          |          |      |          |          |          |          |          |      |          |          |          |          |          |  |   |   |   |   |    |     |          |  |  |  |  |      |          |          |  |  |  |      |          |          |          |  |  |      |          |          |          |          |  |      |          |          |          |          |          |
| 10 B                                                                                                                           | 3.607544                                                                                                                                                                                                                                                                                                                                                                                                                                                                                                                                                                                                                                                                                                                                                                                                                                                                                                                                                                                                                                                                                                                                                                                                                                                                                                                                                                                                                                                                                                                                                                                                                                                                                                                                                                                                                                    | 2.656335 | 1.933255 | 3.051363 | 2.904991 |   |   |      |          |  |  |  |  |     |          |          |  |  |  |     |          |          |          |  |  |      |          |          |          |          |  |      |          |          |          |          |          |     |          |          |          |          |          |      |          |          |          |          |          |      |          |          |          |          |          |      |          |          |          |          |          |      |          |          |          |          |          |  |   |   |   |   |    |     |          |  |  |  |  |      |          |          |  |  |  |      |          |          |          |  |  |      |          |          |          |          |  |      |          |          |          |          |          |
|                                                                                                                                | 6                                                                                                                                                                                                                                                                                                                                                                                                                                                                                                                                                                                                                                                                                                                                                                                                                                                                                                                                                                                                                                                                                                                                                                                                                                                                                                                                                                                                                                                                                                                                                                                                                                                                                                                                                                                                                                           | 7        | 8        | 9        | 10       |   |   |      |          |  |  |  |  |     |          |          |  |  |  |     |          |          |          |  |  |      |          |          |          |          |  |      |          |          |          |          |          |     |          |          |          |          |          |      |          |          |          |          |          |      |          |          |          |          |          |      |          |          |          |          |          |      |          |          |          |          |          |  |   |   |   |   |    |     |          |  |  |  |  |      |          |          |  |  |  |      |          |          |          |  |  |      |          |          |          |          |  |      |          |          |          |          |          |
| 6 B                                                                                                                            | 0.000000                                                                                                                                                                                                                                                                                                                                                                                                                                                                                                                                                                                                                                                                                                                                                                                                                                                                                                                                                                                                                                                                                                                                                                                                                                                                                                                                                                                                                                                                                                                                                                                                                                                                                                                                                                                                                                    |          |          |          |          |   |   |      |          |  |  |  |  |     |          |          |  |  |  |     |          |          |          |  |  |      |          |          |          |          |  |      |          |          |          |          |          |     |          |          |          |          |          |      |          |          |          |          |          |      |          |          |          |          |          |      |          |          |          |          |          |      |          |          |          |          |          |  |   |   |   |   |    |     |          |  |  |  |  |      |          |          |  |  |  |      |          |          |          |  |  |      |          |          |          |          |  |      |          |          |          |          |          |
| 7 Se                                                                                                                           | 2.048408                                                                                                                                                                                                                                                                                                                                                                                                                                                                                                                                                                                                                                                                                                                                                                                                                                                                                                                                                                                                                                                                                                                                                                                                                                                                                                                                                                                                                                                                                                                                                                                                                                                                                                                                                                                                                                    | 0.000000 |          |          |          |   |   |      |          |  |  |  |  |     |          |          |  |  |  |     |          |          |          |  |  |      |          |          |          |          |  |      |          |          |          |          |          |     |          |          |          |          |          |      |          |          |          |          |          |      |          |          |          |          |          |      |          |          |          |          |          |      |          |          |          |          |          |  |   |   |   |   |    |     |          |  |  |  |  |      |          |          |  |  |  |      |          |          |          |  |  |      |          |          |          |          |  |      |          |          |          |          |          |
| 8 Se                                                                                                                           | 3.269791                                                                                                                                                                                                                                                                                                                                                                                                                                                                                                                                                                                                                                                                                                                                                                                                                                                                                                                                                                                                                                                                                                                                                                                                                                                                                                                                                                                                                                                                                                                                                                                                                                                                                                                                                                                                                                    | 3.256050 | 0.000000 |          |          |   |   |      |          |  |  |  |  |     |          |          |  |  |  |     |          |          |          |  |  |      |          |          |          |          |  |      |          |          |          |          |          |     |          |          |          |          |          |      |          |          |          |          |          |      |          |          |          |          |          |      |          |          |          |          |          |      |          |          |          |          |          |  |   |   |   |   |    |     |          |  |  |  |  |      |          |          |  |  |  |      |          |          |          |  |  |      |          |          |          |          |  |      |          |          |          |          |          |
| 9 B                                                                                                                            | 1.715043                                                                                                                                                                                                                                                                                                                                                                                                                                                                                                                                                                                                                                                                                                                                                                                                                                                                                                                                                                                                                                                                                                                                                                                                                                                                                                                                                                                                                                                                                                                                                                                                                                                                                                                                                                                                                                    | 3.539202 | 3.149662 | 0.000000 |          |   |   |      |          |  |  |  |  |     |          |          |  |  |  |     |          |          |          |  |  |      |          |          |          |          |  |      |          |          |          |          |          |     |          |          |          |          |          |      |          |          |          |          |          |      |          |          |          |          |          |      |          |          |          |          |          |      |          |          |          |          |          |  |   |   |   |   |    |     |          |  |  |  |  |      |          |          |  |  |  |      |          |          |          |  |  |      |          |          |          |          |  |      |          |          |          |          |          |
| 10 B                                                                                                                           | 2.044879                                                                                                                                                                                                                                                                                                                                                                                                                                                                                                                                                                                                                                                                                                                                                                                                                                                                                                                                                                                                                                                                                                                                                                                                                                                                                                                                                                                                                                                                                                                                                                                                                                                                                                                                                                                                                                    | 2.925077 | 2.058929 | 1.622943 | 0.000000 |   |   |      |          |  |  |  |  |     |          |          |  |  |  |     |          |          |          |  |  |      |          |          |          |          |  |      |          |          |          |          |          |     |          |          |          |          |          |      |          |          |          |          |          |      |          |          |          |          |          |      |          |          |          |          |          |      |          |          |          |          |          |  |   |   |   |   |    |     |          |  |  |  |  |      |          |          |  |  |  |      |          |          |          |  |  |      |          |          |          |          |  |      |          |          |          |          |          |
|  <p>8. -6557.3251253 +16.0 C<sub>1</sub></p> | <table border="1"> <thead> <tr> <th></th> <th>1</th> <th>2</th> <th>3</th> <th>4</th> <th>5</th> </tr> </thead> <tbody> <tr> <td>1 B</td> <td>0.000000</td> <td></td> <td></td> <td></td> <td></td> </tr> <tr> <td>2 B</td> <td>1.806387</td> <td>0.000000</td> <td></td> <td></td> <td></td> </tr> <tr> <td>3 B</td> <td>2.917916</td> <td>3.100435</td> <td>0.000000</td> <td></td> <td></td> </tr> <tr> <td>4 Co</td> <td>2.147150</td> <td>3.476722</td> <td>2.175022</td> <td>0.000000</td> <td></td> </tr> <tr> <td>5 Se</td> <td>2.187457</td> <td>2.084809</td> <td>2.028345</td> <td>2.348600</td> <td>0.000000</td> </tr> <tr> <td>6 B</td> <td>1.737702</td> <td>1.772335</td> <td>3.194156</td> <td>3.340740</td> <td>3.147982</td> </tr> <tr> <td>7 B</td> <td>1.764357</td> <td>2.959526</td> <td>2.667416</td> <td>2.122053</td> <td>3.205117</td> </tr> <tr> <td>8 B</td> <td>2.914924</td> <td>3.729670</td> <td>1.661435</td> <td>1.998729</td> <td>3.198420</td> </tr> <tr> <td>9 Se</td> <td>3.230005</td> <td>2.026459</td> <td>3.055563</td> <td>4.358696</td> <td>3.246920</td> </tr> <tr> <td>10 B</td> <td>2.790030</td> <td>2.845567</td> <td>2.033679</td> <td>3.099136</td> <td>3.208366</td> </tr> <tr> <th></th> <th>6</th> <th>7</th> <th>8</th> <th>9</th> <th>10</th> </tr> <tr> <td>6 B</td> <td>0.000000</td> <td></td> <td></td> <td></td> <td></td> </tr> <tr> <td>7 B</td> <td>1.769998</td> <td>0.000000</td> <td></td> <td></td> <td></td> </tr> <tr> <td>8 B</td> <td>2.981009</td> <td>1.706683</td> <td>0.000000</td> <td></td> <td></td> </tr> <tr> <td>9 Se</td> <td>2.084144</td> <td>3.321510</td> <td>3.591429</td> <td>0.000000</td> <td></td> </tr> <tr> <td>10 B</td> <td>1.933021</td> <td>1.858758</td> <td>1.701621</td> <td>2.048612</td> <td>0.000000</td> </tr> </tbody> </table>  |          | 1        | 2        | 3        | 4 | 5 | 1 B  | 0.000000 |  |  |  |  | 2 B | 1.806387 | 0.000000 |  |  |  | 3 B | 2.917916 | 3.100435 | 0.000000 |  |  | 4 Co | 2.147150 | 3.476722 | 2.175022 | 0.000000 |  | 5 Se | 2.187457 | 2.084809 | 2.028345 | 2.348600 | 0.000000 | 6 B | 1.737702 | 1.772335 | 3.194156 | 3.340740 | 3.147982 | 7 B  | 1.764357 | 2.959526 | 2.667416 | 2.122053 | 3.205117 | 8 B  | 2.914924 | 3.729670 | 1.661435 | 1.998729 | 3.198420 | 9 Se | 3.230005 | 2.026459 | 3.055563 | 4.358696 | 3.246920 | 10 B | 2.790030 | 2.845567 | 2.033679 | 3.099136 | 3.208366 |  | 6 | 7 | 8 | 9 | 10 | 6 B | 0.000000 |  |  |  |  | 7 B  | 1.769998 | 0.000000 |  |  |  | 8 B  | 2.981009 | 1.706683 | 0.000000 |  |  | 9 Se | 2.084144 | 3.321510 | 3.591429 | 0.000000 |  | 10 B | 1.933021 | 1.858758 | 1.701621 | 2.048612 | 0.000000 |
|                                                                                                                                | 1                                                                                                                                                                                                                                                                                                                                                                                                                                                                                                                                                                                                                                                                                                                                                                                                                                                                                                                                                                                                                                                                                                                                                                                                                                                                                                                                                                                                                                                                                                                                                                                                                                                                                                                                                                                                                                           | 2        | 3        | 4        | 5        |   |   |      |          |  |  |  |  |     |          |          |  |  |  |     |          |          |          |  |  |      |          |          |          |          |  |      |          |          |          |          |          |     |          |          |          |          |          |      |          |          |          |          |          |      |          |          |          |          |          |      |          |          |          |          |          |      |          |          |          |          |          |  |   |   |   |   |    |     |          |  |  |  |  |      |          |          |  |  |  |      |          |          |          |  |  |      |          |          |          |          |  |      |          |          |          |          |          |
| 1 B                                                                                                                            | 0.000000                                                                                                                                                                                                                                                                                                                                                                                                                                                                                                                                                                                                                                                                                                                                                                                                                                                                                                                                                                                                                                                                                                                                                                                                                                                                                                                                                                                                                                                                                                                                                                                                                                                                                                                                                                                                                                    |          |          |          |          |   |   |      |          |  |  |  |  |     |          |          |  |  |  |     |          |          |          |  |  |      |          |          |          |          |  |      |          |          |          |          |          |     |          |          |          |          |          |      |          |          |          |          |          |      |          |          |          |          |          |      |          |          |          |          |          |      |          |          |          |          |          |  |   |   |   |   |    |     |          |  |  |  |  |      |          |          |  |  |  |      |          |          |          |  |  |      |          |          |          |          |  |      |          |          |          |          |          |
| 2 B                                                                                                                            | 1.806387                                                                                                                                                                                                                                                                                                                                                                                                                                                                                                                                                                                                                                                                                                                                                                                                                                                                                                                                                                                                                                                                                                                                                                                                                                                                                                                                                                                                                                                                                                                                                                                                                                                                                                                                                                                                                                    | 0.000000 |          |          |          |   |   |      |          |  |  |  |  |     |          |          |  |  |  |     |          |          |          |  |  |      |          |          |          |          |  |      |          |          |          |          |          |     |          |          |          |          |          |      |          |          |          |          |          |      |          |          |          |          |          |      |          |          |          |          |          |      |          |          |          |          |          |  |   |   |   |   |    |     |          |  |  |  |  |      |          |          |  |  |  |      |          |          |          |  |  |      |          |          |          |          |  |      |          |          |          |          |          |
| 3 B                                                                                                                            | 2.917916                                                                                                                                                                                                                                                                                                                                                                                                                                                                                                                                                                                                                                                                                                                                                                                                                                                                                                                                                                                                                                                                                                                                                                                                                                                                                                                                                                                                                                                                                                                                                                                                                                                                                                                                                                                                                                    | 3.100435 | 0.000000 |          |          |   |   |      |          |  |  |  |  |     |          |          |  |  |  |     |          |          |          |  |  |      |          |          |          |          |  |      |          |          |          |          |          |     |          |          |          |          |          |      |          |          |          |          |          |      |          |          |          |          |          |      |          |          |          |          |          |      |          |          |          |          |          |  |   |   |   |   |    |     |          |  |  |  |  |      |          |          |  |  |  |      |          |          |          |  |  |      |          |          |          |          |  |      |          |          |          |          |          |
| 4 Co                                                                                                                           | 2.147150                                                                                                                                                                                                                                                                                                                                                                                                                                                                                                                                                                                                                                                                                                                                                                                                                                                                                                                                                                                                                                                                                                                                                                                                                                                                                                                                                                                                                                                                                                                                                                                                                                                                                                                                                                                                                                    | 3.476722 | 2.175022 | 0.000000 |          |   |   |      |          |  |  |  |  |     |          |          |  |  |  |     |          |          |          |  |  |      |          |          |          |          |  |      |          |          |          |          |          |     |          |          |          |          |          |      |          |          |          |          |          |      |          |          |          |          |          |      |          |          |          |          |          |      |          |          |          |          |          |  |   |   |   |   |    |     |          |  |  |  |  |      |          |          |  |  |  |      |          |          |          |  |  |      |          |          |          |          |  |      |          |          |          |          |          |
| 5 Se                                                                                                                           | 2.187457                                                                                                                                                                                                                                                                                                                                                                                                                                                                                                                                                                                                                                                                                                                                                                                                                                                                                                                                                                                                                                                                                                                                                                                                                                                                                                                                                                                                                                                                                                                                                                                                                                                                                                                                                                                                                                    | 2.084809 | 2.028345 | 2.348600 | 0.000000 |   |   |      |          |  |  |  |  |     |          |          |  |  |  |     |          |          |          |  |  |      |          |          |          |          |  |      |          |          |          |          |          |     |          |          |          |          |          |      |          |          |          |          |          |      |          |          |          |          |          |      |          |          |          |          |          |      |          |          |          |          |          |  |   |   |   |   |    |     |          |  |  |  |  |      |          |          |  |  |  |      |          |          |          |  |  |      |          |          |          |          |  |      |          |          |          |          |          |
| 6 B                                                                                                                            | 1.737702                                                                                                                                                                                                                                                                                                                                                                                                                                                                                                                                                                                                                                                                                                                                                                                                                                                                                                                                                                                                                                                                                                                                                                                                                                                                                                                                                                                                                                                                                                                                                                                                                                                                                                                                                                                                                                    | 1.772335 | 3.194156 | 3.340740 | 3.147982 |   |   |      |          |  |  |  |  |     |          |          |  |  |  |     |          |          |          |  |  |      |          |          |          |          |  |      |          |          |          |          |          |     |          |          |          |          |          |      |          |          |          |          |          |      |          |          |          |          |          |      |          |          |          |          |          |      |          |          |          |          |          |  |   |   |   |   |    |     |          |  |  |  |  |      |          |          |  |  |  |      |          |          |          |  |  |      |          |          |          |          |  |      |          |          |          |          |          |
| 7 B                                                                                                                            | 1.764357                                                                                                                                                                                                                                                                                                                                                                                                                                                                                                                                                                                                                                                                                                                                                                                                                                                                                                                                                                                                                                                                                                                                                                                                                                                                                                                                                                                                                                                                                                                                                                                                                                                                                                                                                                                                                                    | 2.959526 | 2.667416 | 2.122053 | 3.205117 |   |   |      |          |  |  |  |  |     |          |          |  |  |  |     |          |          |          |  |  |      |          |          |          |          |  |      |          |          |          |          |          |     |          |          |          |          |          |      |          |          |          |          |          |      |          |          |          |          |          |      |          |          |          |          |          |      |          |          |          |          |          |  |   |   |   |   |    |     |          |  |  |  |  |      |          |          |  |  |  |      |          |          |          |  |  |      |          |          |          |          |  |      |          |          |          |          |          |
| 8 B                                                                                                                            | 2.914924                                                                                                                                                                                                                                                                                                                                                                                                                                                                                                                                                                                                                                                                                                                                                                                                                                                                                                                                                                                                                                                                                                                                                                                                                                                                                                                                                                                                                                                                                                                                                                                                                                                                                                                                                                                                                                    | 3.729670 | 1.661435 | 1.998729 | 3.198420 |   |   |      |          |  |  |  |  |     |          |          |  |  |  |     |          |          |          |  |  |      |          |          |          |          |  |      |          |          |          |          |          |     |          |          |          |          |          |      |          |          |          |          |          |      |          |          |          |          |          |      |          |          |          |          |          |      |          |          |          |          |          |  |   |   |   |   |    |     |          |  |  |  |  |      |          |          |  |  |  |      |          |          |          |  |  |      |          |          |          |          |  |      |          |          |          |          |          |
| 9 Se                                                                                                                           | 3.230005                                                                                                                                                                                                                                                                                                                                                                                                                                                                                                                                                                                                                                                                                                                                                                                                                                                                                                                                                                                                                                                                                                                                                                                                                                                                                                                                                                                                                                                                                                                                                                                                                                                                                                                                                                                                                                    | 2.026459 | 3.055563 | 4.358696 | 3.246920 |   |   |      |          |  |  |  |  |     |          |          |  |  |  |     |          |          |          |  |  |      |          |          |          |          |  |      |          |          |          |          |          |     |          |          |          |          |          |      |          |          |          |          |          |      |          |          |          |          |          |      |          |          |          |          |          |      |          |          |          |          |          |  |   |   |   |   |    |     |          |  |  |  |  |      |          |          |  |  |  |      |          |          |          |  |  |      |          |          |          |          |  |      |          |          |          |          |          |
| 10 B                                                                                                                           | 2.790030                                                                                                                                                                                                                                                                                                                                                                                                                                                                                                                                                                                                                                                                                                                                                                                                                                                                                                                                                                                                                                                                                                                                                                                                                                                                                                                                                                                                                                                                                                                                                                                                                                                                                                                                                                                                                                    | 2.845567 | 2.033679 | 3.099136 | 3.208366 |   |   |      |          |  |  |  |  |     |          |          |  |  |  |     |          |          |          |  |  |      |          |          |          |          |  |      |          |          |          |          |          |     |          |          |          |          |          |      |          |          |          |          |          |      |          |          |          |          |          |      |          |          |          |          |          |      |          |          |          |          |          |  |   |   |   |   |    |     |          |  |  |  |  |      |          |          |  |  |  |      |          |          |          |  |  |      |          |          |          |          |  |      |          |          |          |          |          |
|                                                                                                                                | 6                                                                                                                                                                                                                                                                                                                                                                                                                                                                                                                                                                                                                                                                                                                                                                                                                                                                                                                                                                                                                                                                                                                                                                                                                                                                                                                                                                                                                                                                                                                                                                                                                                                                                                                                                                                                                                           | 7        | 8        | 9        | 10       |   |   |      |          |  |  |  |  |     |          |          |  |  |  |     |          |          |          |  |  |      |          |          |          |          |  |      |          |          |          |          |          |     |          |          |          |          |          |      |          |          |          |          |          |      |          |          |          |          |          |      |          |          |          |          |          |      |          |          |          |          |          |  |   |   |   |   |    |     |          |  |  |  |  |      |          |          |  |  |  |      |          |          |          |  |  |      |          |          |          |          |  |      |          |          |          |          |          |
| 6 B                                                                                                                            | 0.000000                                                                                                                                                                                                                                                                                                                                                                                                                                                                                                                                                                                                                                                                                                                                                                                                                                                                                                                                                                                                                                                                                                                                                                                                                                                                                                                                                                                                                                                                                                                                                                                                                                                                                                                                                                                                                                    |          |          |          |          |   |   |      |          |  |  |  |  |     |          |          |  |  |  |     |          |          |          |  |  |      |          |          |          |          |  |      |          |          |          |          |          |     |          |          |          |          |          |      |          |          |          |          |          |      |          |          |          |          |          |      |          |          |          |          |          |      |          |          |          |          |          |  |   |   |   |   |    |     |          |  |  |  |  |      |          |          |  |  |  |      |          |          |          |  |  |      |          |          |          |          |  |      |          |          |          |          |          |
| 7 B                                                                                                                            | 1.769998                                                                                                                                                                                                                                                                                                                                                                                                                                                                                                                                                                                                                                                                                                                                                                                                                                                                                                                                                                                                                                                                                                                                                                                                                                                                                                                                                                                                                                                                                                                                                                                                                                                                                                                                                                                                                                    | 0.000000 |          |          |          |   |   |      |          |  |  |  |  |     |          |          |  |  |  |     |          |          |          |  |  |      |          |          |          |          |  |      |          |          |          |          |          |     |          |          |          |          |          |      |          |          |          |          |          |      |          |          |          |          |          |      |          |          |          |          |          |      |          |          |          |          |          |  |   |   |   |   |    |     |          |  |  |  |  |      |          |          |  |  |  |      |          |          |          |  |  |      |          |          |          |          |  |      |          |          |          |          |          |
| 8 B                                                                                                                            | 2.981009                                                                                                                                                                                                                                                                                                                                                                                                                                                                                                                                                                                                                                                                                                                                                                                                                                                                                                                                                                                                                                                                                                                                                                                                                                                                                                                                                                                                                                                                                                                                                                                                                                                                                                                                                                                                                                    | 1.706683 | 0.000000 |          |          |   |   |      |          |  |  |  |  |     |          |          |  |  |  |     |          |          |          |  |  |      |          |          |          |          |  |      |          |          |          |          |          |     |          |          |          |          |          |      |          |          |          |          |          |      |          |          |          |          |          |      |          |          |          |          |          |      |          |          |          |          |          |  |   |   |   |   |    |     |          |  |  |  |  |      |          |          |  |  |  |      |          |          |          |  |  |      |          |          |          |          |  |      |          |          |          |          |          |
| 9 Se                                                                                                                           | 2.084144                                                                                                                                                                                                                                                                                                                                                                                                                                                                                                                                                                                                                                                                                                                                                                                                                                                                                                                                                                                                                                                                                                                                                                                                                                                                                                                                                                                                                                                                                                                                                                                                                                                                                                                                                                                                                                    | 3.321510 | 3.591429 | 0.000000 |          |   |   |      |          |  |  |  |  |     |          |          |  |  |  |     |          |          |          |  |  |      |          |          |          |          |  |      |          |          |          |          |          |     |          |          |          |          |          |      |          |          |          |          |          |      |          |          |          |          |          |      |          |          |          |          |          |      |          |          |          |          |          |  |   |   |   |   |    |     |          |  |  |  |  |      |          |          |  |  |  |      |          |          |          |  |  |      |          |          |          |          |  |      |          |          |          |          |          |
| 10 B                                                                                                                           | 1.933021                                                                                                                                                                                                                                                                                                                                                                                                                                                                                                                                                                                                                                                                                                                                                                                                                                                                                                                                                                                                                                                                                                                                                                                                                                                                                                                                                                                                                                                                                                                                                                                                                                                                                                                                                                                                                                    | 1.858758 | 1.701621 | 2.048612 | 0.000000 |   |   |      |          |  |  |  |  |     |          |          |  |  |  |     |          |          |          |  |  |      |          |          |          |          |  |      |          |          |          |          |          |     |          |          |          |          |          |      |          |          |          |          |          |      |          |          |          |          |          |      |          |          |          |          |          |      |          |          |          |          |          |  |   |   |   |   |    |     |          |  |  |  |  |      |          |          |  |  |  |      |          |          |          |  |  |      |          |          |          |          |  |      |          |          |          |          |          |

| 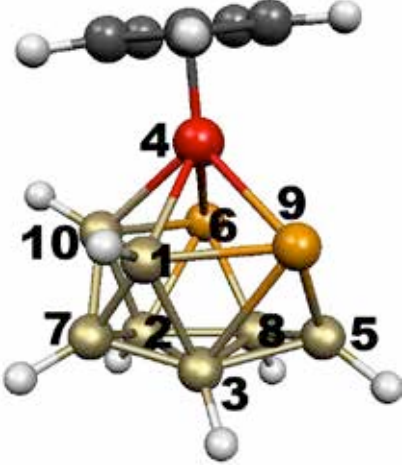 <p>9. -6557.3225619 +17.6 C<sub>1</sub></p>   | <table border="1"> <thead> <tr> <th></th> <th>1</th> <th>2</th> <th>3</th> <th>4</th> <th>5</th> </tr> </thead> <tbody> <tr><td>1 B</td><td>0.000000</td><td></td><td></td><td></td><td></td></tr> <tr><td>2 B</td><td>2.727380</td><td>0.000000</td><td></td><td></td><td></td></tr> <tr><td>3 B</td><td>2.020042</td><td>1.833228</td><td>0.000000</td><td></td><td></td></tr> <tr><td>4 Co</td><td>2.103868</td><td>3.422176</td><td>3.359822</td><td>0.000000</td><td></td></tr> <tr><td>5 B</td><td>3.036734</td><td>3.057959</td><td>1.878271</td><td>3.440546</td><td>0.000000</td></tr> <tr><td>6 Se</td><td>3.160211</td><td>2.131765</td><td>3.040566</td><td>2.347234</td><td>3.128606</td></tr> <tr><td>7 B</td><td>1.681580</td><td>1.681644</td><td>1.670149</td><td>3.284656</td><td>3.419610</td></tr> <tr><td>8 B</td><td>3.186220</td><td>1.819474</td><td>1.813801</td><td>3.423566</td><td>1.636472</td></tr> <tr><td>9 Se</td><td>2.111027</td><td>3.769039</td><td>2.525790</td><td>2.366925</td><td>1.964308</td></tr> <tr><td>10 B</td><td>1.837139</td><td>1.898943</td><td>2.635471</td><td>2.124257</td><td>3.732798</td></tr> <tr> <th></th> <th>6</th> <th>7</th> <th>8</th> <th>9</th> <th>10</th> </tr> <tr><td>6 Se</td><td>0.000000</td><td></td><td></td><td></td><td></td></tr> <tr><td>7 B</td><td>3.193483</td><td>0.000000</td><td></td><td></td><td></td></tr> <tr><td>8 B</td><td>2.055263</td><td>2.928979</td><td>0.000000</td><td></td><td></td></tr> <tr><td>9 Se</td><td>3.492123</td><td>3.409952</td><td>3.052377</td><td>0.000000</td><td></td></tr> <tr><td>10 B</td><td>2.111157</td><td>1.710975</td><td>3.016102</td><td>3.415135</td><td>0.000000</td></tr> </tbody> </table> |          | 1        | 2        | 3        | 4 | 5 | 1 B | 0.000000 |  |  |  |  | 2 B  | 2.727380 | 0.000000 |  |  |  | 3 B | 2.020042 | 1.833228 | 0.000000 |  |  | 4 Co | 2.103868 | 3.422176 | 3.359822 | 0.000000 |  | 5 B | 3.036734 | 3.057959 | 1.878271 | 3.440546 | 0.000000 | 6 Se | 3.160211 | 2.131765 | 3.040566 | 2.347234 | 3.128606 | 7 B  | 1.681580 | 1.681644 | 1.670149 | 3.284656 | 3.419610 | 8 B | 3.186220 | 1.819474 | 1.813801 | 3.423566 | 1.636472 | 9 Se | 2.111027 | 3.769039 | 2.525790 | 2.366925 | 1.964308 | 10 B | 1.837139 | 1.898943 | 2.635471 | 2.124257 | 3.732798 |  | 6 | 7 | 8 | 9 | 10 | 6 Se | 0.000000 |  |  |  |  | 7 B  | 3.193483 | 0.000000 |  |  |  | 8 B | 2.055263 | 2.928979 | 0.000000 |  |  | 9 Se | 3.492123 | 3.409952 | 3.052377 | 0.000000 |  | 10 B | 2.111157 | 1.710975 | 3.016102 | 3.415135 | 0.000000 |
|---------------------------------------------------------------------------------------------------------------------------------|------------------------------------------------------------------------------------------------------------------------------------------------------------------------------------------------------------------------------------------------------------------------------------------------------------------------------------------------------------------------------------------------------------------------------------------------------------------------------------------------------------------------------------------------------------------------------------------------------------------------------------------------------------------------------------------------------------------------------------------------------------------------------------------------------------------------------------------------------------------------------------------------------------------------------------------------------------------------------------------------------------------------------------------------------------------------------------------------------------------------------------------------------------------------------------------------------------------------------------------------------------------------------------------------------------------------------------------------------------------------------------------------------------------------------------------------------------------------------------------------------------------------------------------------------------------------------------------------------------------------------------------------------------------------------------------------------------------------------------|----------|----------|----------|----------|---|---|-----|----------|--|--|--|--|------|----------|----------|--|--|--|-----|----------|----------|----------|--|--|------|----------|----------|----------|----------|--|-----|----------|----------|----------|----------|----------|------|----------|----------|----------|----------|----------|------|----------|----------|----------|----------|----------|-----|----------|----------|----------|----------|----------|------|----------|----------|----------|----------|----------|------|----------|----------|----------|----------|----------|--|---|---|---|---|----|------|----------|--|--|--|--|------|----------|----------|--|--|--|-----|----------|----------|----------|--|--|------|----------|----------|----------|----------|--|------|----------|----------|----------|----------|----------|
|                                                                                                                                 | 1                                                                                                                                                                                                                                                                                                                                                                                                                                                                                                                                                                                                                                                                                                                                                                                                                                                                                                                                                                                                                                                                                                                                                                                                                                                                                                                                                                                                                                                                                                                                                                                                                                                                                                                                  | 2        | 3        | 4        | 5        |   |   |     |          |  |  |  |  |      |          |          |  |  |  |     |          |          |          |  |  |      |          |          |          |          |  |     |          |          |          |          |          |      |          |          |          |          |          |      |          |          |          |          |          |     |          |          |          |          |          |      |          |          |          |          |          |      |          |          |          |          |          |  |   |   |   |   |    |      |          |  |  |  |  |      |          |          |  |  |  |     |          |          |          |  |  |      |          |          |          |          |  |      |          |          |          |          |          |
| 1 B                                                                                                                             | 0.000000                                                                                                                                                                                                                                                                                                                                                                                                                                                                                                                                                                                                                                                                                                                                                                                                                                                                                                                                                                                                                                                                                                                                                                                                                                                                                                                                                                                                                                                                                                                                                                                                                                                                                                                           |          |          |          |          |   |   |     |          |  |  |  |  |      |          |          |  |  |  |     |          |          |          |  |  |      |          |          |          |          |  |     |          |          |          |          |          |      |          |          |          |          |          |      |          |          |          |          |          |     |          |          |          |          |          |      |          |          |          |          |          |      |          |          |          |          |          |  |   |   |   |   |    |      |          |  |  |  |  |      |          |          |  |  |  |     |          |          |          |  |  |      |          |          |          |          |  |      |          |          |          |          |          |
| 2 B                                                                                                                             | 2.727380                                                                                                                                                                                                                                                                                                                                                                                                                                                                                                                                                                                                                                                                                                                                                                                                                                                                                                                                                                                                                                                                                                                                                                                                                                                                                                                                                                                                                                                                                                                                                                                                                                                                                                                           | 0.000000 |          |          |          |   |   |     |          |  |  |  |  |      |          |          |  |  |  |     |          |          |          |  |  |      |          |          |          |          |  |     |          |          |          |          |          |      |          |          |          |          |          |      |          |          |          |          |          |     |          |          |          |          |          |      |          |          |          |          |          |      |          |          |          |          |          |  |   |   |   |   |    |      |          |  |  |  |  |      |          |          |  |  |  |     |          |          |          |  |  |      |          |          |          |          |  |      |          |          |          |          |          |
| 3 B                                                                                                                             | 2.020042                                                                                                                                                                                                                                                                                                                                                                                                                                                                                                                                                                                                                                                                                                                                                                                                                                                                                                                                                                                                                                                                                                                                                                                                                                                                                                                                                                                                                                                                                                                                                                                                                                                                                                                           | 1.833228 | 0.000000 |          |          |   |   |     |          |  |  |  |  |      |          |          |  |  |  |     |          |          |          |  |  |      |          |          |          |          |  |     |          |          |          |          |          |      |          |          |          |          |          |      |          |          |          |          |          |     |          |          |          |          |          |      |          |          |          |          |          |      |          |          |          |          |          |  |   |   |   |   |    |      |          |  |  |  |  |      |          |          |  |  |  |     |          |          |          |  |  |      |          |          |          |          |  |      |          |          |          |          |          |
| 4 Co                                                                                                                            | 2.103868                                                                                                                                                                                                                                                                                                                                                                                                                                                                                                                                                                                                                                                                                                                                                                                                                                                                                                                                                                                                                                                                                                                                                                                                                                                                                                                                                                                                                                                                                                                                                                                                                                                                                                                           | 3.422176 | 3.359822 | 0.000000 |          |   |   |     |          |  |  |  |  |      |          |          |  |  |  |     |          |          |          |  |  |      |          |          |          |          |  |     |          |          |          |          |          |      |          |          |          |          |          |      |          |          |          |          |          |     |          |          |          |          |          |      |          |          |          |          |          |      |          |          |          |          |          |  |   |   |   |   |    |      |          |  |  |  |  |      |          |          |  |  |  |     |          |          |          |  |  |      |          |          |          |          |  |      |          |          |          |          |          |
| 5 B                                                                                                                             | 3.036734                                                                                                                                                                                                                                                                                                                                                                                                                                                                                                                                                                                                                                                                                                                                                                                                                                                                                                                                                                                                                                                                                                                                                                                                                                                                                                                                                                                                                                                                                                                                                                                                                                                                                                                           | 3.057959 | 1.878271 | 3.440546 | 0.000000 |   |   |     |          |  |  |  |  |      |          |          |  |  |  |     |          |          |          |  |  |      |          |          |          |          |  |     |          |          |          |          |          |      |          |          |          |          |          |      |          |          |          |          |          |     |          |          |          |          |          |      |          |          |          |          |          |      |          |          |          |          |          |  |   |   |   |   |    |      |          |  |  |  |  |      |          |          |  |  |  |     |          |          |          |  |  |      |          |          |          |          |  |      |          |          |          |          |          |
| 6 Se                                                                                                                            | 3.160211                                                                                                                                                                                                                                                                                                                                                                                                                                                                                                                                                                                                                                                                                                                                                                                                                                                                                                                                                                                                                                                                                                                                                                                                                                                                                                                                                                                                                                                                                                                                                                                                                                                                                                                           | 2.131765 | 3.040566 | 2.347234 | 3.128606 |   |   |     |          |  |  |  |  |      |          |          |  |  |  |     |          |          |          |  |  |      |          |          |          |          |  |     |          |          |          |          |          |      |          |          |          |          |          |      |          |          |          |          |          |     |          |          |          |          |          |      |          |          |          |          |          |      |          |          |          |          |          |  |   |   |   |   |    |      |          |  |  |  |  |      |          |          |  |  |  |     |          |          |          |  |  |      |          |          |          |          |  |      |          |          |          |          |          |
| 7 B                                                                                                                             | 1.681580                                                                                                                                                                                                                                                                                                                                                                                                                                                                                                                                                                                                                                                                                                                                                                                                                                                                                                                                                                                                                                                                                                                                                                                                                                                                                                                                                                                                                                                                                                                                                                                                                                                                                                                           | 1.681644 | 1.670149 | 3.284656 | 3.419610 |   |   |     |          |  |  |  |  |      |          |          |  |  |  |     |          |          |          |  |  |      |          |          |          |          |  |     |          |          |          |          |          |      |          |          |          |          |          |      |          |          |          |          |          |     |          |          |          |          |          |      |          |          |          |          |          |      |          |          |          |          |          |  |   |   |   |   |    |      |          |  |  |  |  |      |          |          |  |  |  |     |          |          |          |  |  |      |          |          |          |          |  |      |          |          |          |          |          |
| 8 B                                                                                                                             | 3.186220                                                                                                                                                                                                                                                                                                                                                                                                                                                                                                                                                                                                                                                                                                                                                                                                                                                                                                                                                                                                                                                                                                                                                                                                                                                                                                                                                                                                                                                                                                                                                                                                                                                                                                                           | 1.819474 | 1.813801 | 3.423566 | 1.636472 |   |   |     |          |  |  |  |  |      |          |          |  |  |  |     |          |          |          |  |  |      |          |          |          |          |  |     |          |          |          |          |          |      |          |          |          |          |          |      |          |          |          |          |          |     |          |          |          |          |          |      |          |          |          |          |          |      |          |          |          |          |          |  |   |   |   |   |    |      |          |  |  |  |  |      |          |          |  |  |  |     |          |          |          |  |  |      |          |          |          |          |  |      |          |          |          |          |          |
| 9 Se                                                                                                                            | 2.111027                                                                                                                                                                                                                                                                                                                                                                                                                                                                                                                                                                                                                                                                                                                                                                                                                                                                                                                                                                                                                                                                                                                                                                                                                                                                                                                                                                                                                                                                                                                                                                                                                                                                                                                           | 3.769039 | 2.525790 | 2.366925 | 1.964308 |   |   |     |          |  |  |  |  |      |          |          |  |  |  |     |          |          |          |  |  |      |          |          |          |          |  |     |          |          |          |          |          |      |          |          |          |          |          |      |          |          |          |          |          |     |          |          |          |          |          |      |          |          |          |          |          |      |          |          |          |          |          |  |   |   |   |   |    |      |          |  |  |  |  |      |          |          |  |  |  |     |          |          |          |  |  |      |          |          |          |          |  |      |          |          |          |          |          |
| 10 B                                                                                                                            | 1.837139                                                                                                                                                                                                                                                                                                                                                                                                                                                                                                                                                                                                                                                                                                                                                                                                                                                                                                                                                                                                                                                                                                                                                                                                                                                                                                                                                                                                                                                                                                                                                                                                                                                                                                                           | 1.898943 | 2.635471 | 2.124257 | 3.732798 |   |   |     |          |  |  |  |  |      |          |          |  |  |  |     |          |          |          |  |  |      |          |          |          |          |  |     |          |          |          |          |          |      |          |          |          |          |          |      |          |          |          |          |          |     |          |          |          |          |          |      |          |          |          |          |          |      |          |          |          |          |          |  |   |   |   |   |    |      |          |  |  |  |  |      |          |          |  |  |  |     |          |          |          |  |  |      |          |          |          |          |  |      |          |          |          |          |          |
|                                                                                                                                 | 6                                                                                                                                                                                                                                                                                                                                                                                                                                                                                                                                                                                                                                                                                                                                                                                                                                                                                                                                                                                                                                                                                                                                                                                                                                                                                                                                                                                                                                                                                                                                                                                                                                                                                                                                  | 7        | 8        | 9        | 10       |   |   |     |          |  |  |  |  |      |          |          |  |  |  |     |          |          |          |  |  |      |          |          |          |          |  |     |          |          |          |          |          |      |          |          |          |          |          |      |          |          |          |          |          |     |          |          |          |          |          |      |          |          |          |          |          |      |          |          |          |          |          |  |   |   |   |   |    |      |          |  |  |  |  |      |          |          |  |  |  |     |          |          |          |  |  |      |          |          |          |          |  |      |          |          |          |          |          |
| 6 Se                                                                                                                            | 0.000000                                                                                                                                                                                                                                                                                                                                                                                                                                                                                                                                                                                                                                                                                                                                                                                                                                                                                                                                                                                                                                                                                                                                                                                                                                                                                                                                                                                                                                                                                                                                                                                                                                                                                                                           |          |          |          |          |   |   |     |          |  |  |  |  |      |          |          |  |  |  |     |          |          |          |  |  |      |          |          |          |          |  |     |          |          |          |          |          |      |          |          |          |          |          |      |          |          |          |          |          |     |          |          |          |          |          |      |          |          |          |          |          |      |          |          |          |          |          |  |   |   |   |   |    |      |          |  |  |  |  |      |          |          |  |  |  |     |          |          |          |  |  |      |          |          |          |          |  |      |          |          |          |          |          |
| 7 B                                                                                                                             | 3.193483                                                                                                                                                                                                                                                                                                                                                                                                                                                                                                                                                                                                                                                                                                                                                                                                                                                                                                                                                                                                                                                                                                                                                                                                                                                                                                                                                                                                                                                                                                                                                                                                                                                                                                                           | 0.000000 |          |          |          |   |   |     |          |  |  |  |  |      |          |          |  |  |  |     |          |          |          |  |  |      |          |          |          |          |  |     |          |          |          |          |          |      |          |          |          |          |          |      |          |          |          |          |          |     |          |          |          |          |          |      |          |          |          |          |          |      |          |          |          |          |          |  |   |   |   |   |    |      |          |  |  |  |  |      |          |          |  |  |  |     |          |          |          |  |  |      |          |          |          |          |  |      |          |          |          |          |          |
| 8 B                                                                                                                             | 2.055263                                                                                                                                                                                                                                                                                                                                                                                                                                                                                                                                                                                                                                                                                                                                                                                                                                                                                                                                                                                                                                                                                                                                                                                                                                                                                                                                                                                                                                                                                                                                                                                                                                                                                                                           | 2.928979 | 0.000000 |          |          |   |   |     |          |  |  |  |  |      |          |          |  |  |  |     |          |          |          |  |  |      |          |          |          |          |  |     |          |          |          |          |          |      |          |          |          |          |          |      |          |          |          |          |          |     |          |          |          |          |          |      |          |          |          |          |          |      |          |          |          |          |          |  |   |   |   |   |    |      |          |  |  |  |  |      |          |          |  |  |  |     |          |          |          |  |  |      |          |          |          |          |  |      |          |          |          |          |          |
| 9 Se                                                                                                                            | 3.492123                                                                                                                                                                                                                                                                                                                                                                                                                                                                                                                                                                                                                                                                                                                                                                                                                                                                                                                                                                                                                                                                                                                                                                                                                                                                                                                                                                                                                                                                                                                                                                                                                                                                                                                           | 3.409952 | 3.052377 | 0.000000 |          |   |   |     |          |  |  |  |  |      |          |          |  |  |  |     |          |          |          |  |  |      |          |          |          |          |  |     |          |          |          |          |          |      |          |          |          |          |          |      |          |          |          |          |          |     |          |          |          |          |          |      |          |          |          |          |          |      |          |          |          |          |          |  |   |   |   |   |    |      |          |  |  |  |  |      |          |          |  |  |  |     |          |          |          |  |  |      |          |          |          |          |  |      |          |          |          |          |          |
| 10 B                                                                                                                            | 2.111157                                                                                                                                                                                                                                                                                                                                                                                                                                                                                                                                                                                                                                                                                                                                                                                                                                                                                                                                                                                                                                                                                                                                                                                                                                                                                                                                                                                                                                                                                                                                                                                                                                                                                                                           | 1.710975 | 3.016102 | 3.415135 | 0.000000 |   |   |     |          |  |  |  |  |      |          |          |  |  |  |     |          |          |          |  |  |      |          |          |          |          |  |     |          |          |          |          |          |      |          |          |          |          |          |      |          |          |          |          |          |     |          |          |          |          |          |      |          |          |          |          |          |      |          |          |          |          |          |  |   |   |   |   |    |      |          |  |  |  |  |      |          |          |  |  |  |     |          |          |          |  |  |      |          |          |          |          |  |      |          |          |          |          |          |
|  <p>10. -6557.3220782 +17.9 C<sub>1</sub></p> | <table border="1"> <thead> <tr> <th></th> <th>1</th> <th>2</th> <th>3</th> <th>4</th> <th>5</th> </tr> </thead> <tbody> <tr><td>1 B</td><td>0.000000</td><td></td><td></td><td></td><td></td></tr> <tr><td>2 Se</td><td>2.052823</td><td>0.000000</td><td></td><td></td><td></td></tr> <tr><td>3 B</td><td>2.814035</td><td>3.161635</td><td>0.000000</td><td></td><td></td></tr> <tr><td>4 B</td><td>1.828635</td><td>3.444647</td><td>2.816145</td><td>0.000000</td><td></td></tr> <tr><td>5 B</td><td>2.930979</td><td>4.043748</td><td>1.776947</td><td>1.794285</td><td>0.000000</td></tr> <tr><td>6 Co</td><td>2.242410</td><td>2.382993</td><td>3.397691</td><td>2.195081</td><td>3.180967</td></tr> <tr><td>7 Se</td><td>3.421144</td><td>3.328157</td><td>2.056967</td><td>2.918619</td><td>2.209260</td></tr> <tr><td>8 B</td><td>1.744207</td><td>3.209694</td><td>1.775607</td><td>1.756901</td><td>1.731245</td></tr> <tr><td>9 B</td><td>1.876698</td><td>2.038366</td><td>1.700366</td><td>2.970513</td><td>2.920126</td></tr> <tr><td>10 B</td><td>3.099009</td><td>3.965960</td><td>2.990892</td><td>1.671416</td><td>1.806366</td></tr> <tr> <th></th> <th>6</th> <th>7</th> <th>8</th> <th>9</th> <th>10</th> </tr> <tr><td>6 Co</td><td>0.000000</td><td></td><td></td><td></td><td></td></tr> <tr><td>7 Se</td><td>2.493444</td><td>0.000000</td><td></td><td></td><td></td></tr> <tr><td>8 B</td><td>3.206902</td><td>3.111517</td><td>0.000000</td><td></td><td></td></tr> <tr><td>9 B</td><td>3.255887</td><td>3.109806</td><td>1.741492</td><td>0.000000</td><td></td></tr> <tr><td>10 B</td><td>2.109184</td><td>1.995037</td><td>2.895412</td><td>3.767128</td><td>0.000000</td></tr> </tbody> </table> |          | 1        | 2        | 3        | 4 | 5 | 1 B | 0.000000 |  |  |  |  | 2 Se | 2.052823 | 0.000000 |  |  |  | 3 B | 2.814035 | 3.161635 | 0.000000 |  |  | 4 B  | 1.828635 | 3.444647 | 2.816145 | 0.000000 |  | 5 B | 2.930979 | 4.043748 | 1.776947 | 1.794285 | 0.000000 | 6 Co | 2.242410 | 2.382993 | 3.397691 | 2.195081 | 3.180967 | 7 Se | 3.421144 | 3.328157 | 2.056967 | 2.918619 | 2.209260 | 8 B | 1.744207 | 3.209694 | 1.775607 | 1.756901 | 1.731245 | 9 B  | 1.876698 | 2.038366 | 1.700366 | 2.970513 | 2.920126 | 10 B | 3.099009 | 3.965960 | 2.990892 | 1.671416 | 1.806366 |  | 6 | 7 | 8 | 9 | 10 | 6 Co | 0.000000 |  |  |  |  | 7 Se | 2.493444 | 0.000000 |  |  |  | 8 B | 3.206902 | 3.111517 | 0.000000 |  |  | 9 B  | 3.255887 | 3.109806 | 1.741492 | 0.000000 |  | 10 B | 2.109184 | 1.995037 | 2.895412 | 3.767128 | 0.000000 |
|                                                                                                                                 | 1                                                                                                                                                                                                                                                                                                                                                                                                                                                                                                                                                                                                                                                                                                                                                                                                                                                                                                                                                                                                                                                                                                                                                                                                                                                                                                                                                                                                                                                                                                                                                                                                                                                                                                                                  | 2        | 3        | 4        | 5        |   |   |     |          |  |  |  |  |      |          |          |  |  |  |     |          |          |          |  |  |      |          |          |          |          |  |     |          |          |          |          |          |      |          |          |          |          |          |      |          |          |          |          |          |     |          |          |          |          |          |      |          |          |          |          |          |      |          |          |          |          |          |  |   |   |   |   |    |      |          |  |  |  |  |      |          |          |  |  |  |     |          |          |          |  |  |      |          |          |          |          |  |      |          |          |          |          |          |
| 1 B                                                                                                                             | 0.000000                                                                                                                                                                                                                                                                                                                                                                                                                                                                                                                                                                                                                                                                                                                                                                                                                                                                                                                                                                                                                                                                                                                                                                                                                                                                                                                                                                                                                                                                                                                                                                                                                                                                                                                           |          |          |          |          |   |   |     |          |  |  |  |  |      |          |          |  |  |  |     |          |          |          |  |  |      |          |          |          |          |  |     |          |          |          |          |          |      |          |          |          |          |          |      |          |          |          |          |          |     |          |          |          |          |          |      |          |          |          |          |          |      |          |          |          |          |          |  |   |   |   |   |    |      |          |  |  |  |  |      |          |          |  |  |  |     |          |          |          |  |  |      |          |          |          |          |  |      |          |          |          |          |          |
| 2 Se                                                                                                                            | 2.052823                                                                                                                                                                                                                                                                                                                                                                                                                                                                                                                                                                                                                                                                                                                                                                                                                                                                                                                                                                                                                                                                                                                                                                                                                                                                                                                                                                                                                                                                                                                                                                                                                                                                                                                           | 0.000000 |          |          |          |   |   |     |          |  |  |  |  |      |          |          |  |  |  |     |          |          |          |  |  |      |          |          |          |          |  |     |          |          |          |          |          |      |          |          |          |          |          |      |          |          |          |          |          |     |          |          |          |          |          |      |          |          |          |          |          |      |          |          |          |          |          |  |   |   |   |   |    |      |          |  |  |  |  |      |          |          |  |  |  |     |          |          |          |  |  |      |          |          |          |          |  |      |          |          |          |          |          |
| 3 B                                                                                                                             | 2.814035                                                                                                                                                                                                                                                                                                                                                                                                                                                                                                                                                                                                                                                                                                                                                                                                                                                                                                                                                                                                                                                                                                                                                                                                                                                                                                                                                                                                                                                                                                                                                                                                                                                                                                                           | 3.161635 | 0.000000 |          |          |   |   |     |          |  |  |  |  |      |          |          |  |  |  |     |          |          |          |  |  |      |          |          |          |          |  |     |          |          |          |          |          |      |          |          |          |          |          |      |          |          |          |          |          |     |          |          |          |          |          |      |          |          |          |          |          |      |          |          |          |          |          |  |   |   |   |   |    |      |          |  |  |  |  |      |          |          |  |  |  |     |          |          |          |  |  |      |          |          |          |          |  |      |          |          |          |          |          |
| 4 B                                                                                                                             | 1.828635                                                                                                                                                                                                                                                                                                                                                                                                                                                                                                                                                                                                                                                                                                                                                                                                                                                                                                                                                                                                                                                                                                                                                                                                                                                                                                                                                                                                                                                                                                                                                                                                                                                                                                                           | 3.444647 | 2.816145 | 0.000000 |          |   |   |     |          |  |  |  |  |      |          |          |  |  |  |     |          |          |          |  |  |      |          |          |          |          |  |     |          |          |          |          |          |      |          |          |          |          |          |      |          |          |          |          |          |     |          |          |          |          |          |      |          |          |          |          |          |      |          |          |          |          |          |  |   |   |   |   |    |      |          |  |  |  |  |      |          |          |  |  |  |     |          |          |          |  |  |      |          |          |          |          |  |      |          |          |          |          |          |
| 5 B                                                                                                                             | 2.930979                                                                                                                                                                                                                                                                                                                                                                                                                                                                                                                                                                                                                                                                                                                                                                                                                                                                                                                                                                                                                                                                                                                                                                                                                                                                                                                                                                                                                                                                                                                                                                                                                                                                                                                           | 4.043748 | 1.776947 | 1.794285 | 0.000000 |   |   |     |          |  |  |  |  |      |          |          |  |  |  |     |          |          |          |  |  |      |          |          |          |          |  |     |          |          |          |          |          |      |          |          |          |          |          |      |          |          |          |          |          |     |          |          |          |          |          |      |          |          |          |          |          |      |          |          |          |          |          |  |   |   |   |   |    |      |          |  |  |  |  |      |          |          |  |  |  |     |          |          |          |  |  |      |          |          |          |          |  |      |          |          |          |          |          |
| 6 Co                                                                                                                            | 2.242410                                                                                                                                                                                                                                                                                                                                                                                                                                                                                                                                                                                                                                                                                                                                                                                                                                                                                                                                                                                                                                                                                                                                                                                                                                                                                                                                                                                                                                                                                                                                                                                                                                                                                                                           | 2.382993 | 3.397691 | 2.195081 | 3.180967 |   |   |     |          |  |  |  |  |      |          |          |  |  |  |     |          |          |          |  |  |      |          |          |          |          |  |     |          |          |          |          |          |      |          |          |          |          |          |      |          |          |          |          |          |     |          |          |          |          |          |      |          |          |          |          |          |      |          |          |          |          |          |  |   |   |   |   |    |      |          |  |  |  |  |      |          |          |  |  |  |     |          |          |          |  |  |      |          |          |          |          |  |      |          |          |          |          |          |
| 7 Se                                                                                                                            | 3.421144                                                                                                                                                                                                                                                                                                                                                                                                                                                                                                                                                                                                                                                                                                                                                                                                                                                                                                                                                                                                                                                                                                                                                                                                                                                                                                                                                                                                                                                                                                                                                                                                                                                                                                                           | 3.328157 | 2.056967 | 2.918619 | 2.209260 |   |   |     |          |  |  |  |  |      |          |          |  |  |  |     |          |          |          |  |  |      |          |          |          |          |  |     |          |          |          |          |          |      |          |          |          |          |          |      |          |          |          |          |          |     |          |          |          |          |          |      |          |          |          |          |          |      |          |          |          |          |          |  |   |   |   |   |    |      |          |  |  |  |  |      |          |          |  |  |  |     |          |          |          |  |  |      |          |          |          |          |  |      |          |          |          |          |          |
| 8 B                                                                                                                             | 1.744207                                                                                                                                                                                                                                                                                                                                                                                                                                                                                                                                                                                                                                                                                                                                                                                                                                                                                                                                                                                                                                                                                                                                                                                                                                                                                                                                                                                                                                                                                                                                                                                                                                                                                                                           | 3.209694 | 1.775607 | 1.756901 | 1.731245 |   |   |     |          |  |  |  |  |      |          |          |  |  |  |     |          |          |          |  |  |      |          |          |          |          |  |     |          |          |          |          |          |      |          |          |          |          |          |      |          |          |          |          |          |     |          |          |          |          |          |      |          |          |          |          |          |      |          |          |          |          |          |  |   |   |   |   |    |      |          |  |  |  |  |      |          |          |  |  |  |     |          |          |          |  |  |      |          |          |          |          |  |      |          |          |          |          |          |
| 9 B                                                                                                                             | 1.876698                                                                                                                                                                                                                                                                                                                                                                                                                                                                                                                                                                                                                                                                                                                                                                                                                                                                                                                                                                                                                                                                                                                                                                                                                                                                                                                                                                                                                                                                                                                                                                                                                                                                                                                           | 2.038366 | 1.700366 | 2.970513 | 2.920126 |   |   |     |          |  |  |  |  |      |          |          |  |  |  |     |          |          |          |  |  |      |          |          |          |          |  |     |          |          |          |          |          |      |          |          |          |          |          |      |          |          |          |          |          |     |          |          |          |          |          |      |          |          |          |          |          |      |          |          |          |          |          |  |   |   |   |   |    |      |          |  |  |  |  |      |          |          |  |  |  |     |          |          |          |  |  |      |          |          |          |          |  |      |          |          |          |          |          |
| 10 B                                                                                                                            | 3.099009                                                                                                                                                                                                                                                                                                                                                                                                                                                                                                                                                                                                                                                                                                                                                                                                                                                                                                                                                                                                                                                                                                                                                                                                                                                                                                                                                                                                                                                                                                                                                                                                                                                                                                                           | 3.965960 | 2.990892 | 1.671416 | 1.806366 |   |   |     |          |  |  |  |  |      |          |          |  |  |  |     |          |          |          |  |  |      |          |          |          |          |  |     |          |          |          |          |          |      |          |          |          |          |          |      |          |          |          |          |          |     |          |          |          |          |          |      |          |          |          |          |          |      |          |          |          |          |          |  |   |   |   |   |    |      |          |  |  |  |  |      |          |          |  |  |  |     |          |          |          |  |  |      |          |          |          |          |  |      |          |          |          |          |          |
|                                                                                                                                 | 6                                                                                                                                                                                                                                                                                                                                                                                                                                                                                                                                                                                                                                                                                                                                                                                                                                                                                                                                                                                                                                                                                                                                                                                                                                                                                                                                                                                                                                                                                                                                                                                                                                                                                                                                  | 7        | 8        | 9        | 10       |   |   |     |          |  |  |  |  |      |          |          |  |  |  |     |          |          |          |  |  |      |          |          |          |          |  |     |          |          |          |          |          |      |          |          |          |          |          |      |          |          |          |          |          |     |          |          |          |          |          |      |          |          |          |          |          |      |          |          |          |          |          |  |   |   |   |   |    |      |          |  |  |  |  |      |          |          |  |  |  |     |          |          |          |  |  |      |          |          |          |          |  |      |          |          |          |          |          |
| 6 Co                                                                                                                            | 0.000000                                                                                                                                                                                                                                                                                                                                                                                                                                                                                                                                                                                                                                                                                                                                                                                                                                                                                                                                                                                                                                                                                                                                                                                                                                                                                                                                                                                                                                                                                                                                                                                                                                                                                                                           |          |          |          |          |   |   |     |          |  |  |  |  |      |          |          |  |  |  |     |          |          |          |  |  |      |          |          |          |          |  |     |          |          |          |          |          |      |          |          |          |          |          |      |          |          |          |          |          |     |          |          |          |          |          |      |          |          |          |          |          |      |          |          |          |          |          |  |   |   |   |   |    |      |          |  |  |  |  |      |          |          |  |  |  |     |          |          |          |  |  |      |          |          |          |          |  |      |          |          |          |          |          |
| 7 Se                                                                                                                            | 2.493444                                                                                                                                                                                                                                                                                                                                                                                                                                                                                                                                                                                                                                                                                                                                                                                                                                                                                                                                                                                                                                                                                                                                                                                                                                                                                                                                                                                                                                                                                                                                                                                                                                                                                                                           | 0.000000 |          |          |          |   |   |     |          |  |  |  |  |      |          |          |  |  |  |     |          |          |          |  |  |      |          |          |          |          |  |     |          |          |          |          |          |      |          |          |          |          |          |      |          |          |          |          |          |     |          |          |          |          |          |      |          |          |          |          |          |      |          |          |          |          |          |  |   |   |   |   |    |      |          |  |  |  |  |      |          |          |  |  |  |     |          |          |          |  |  |      |          |          |          |          |  |      |          |          |          |          |          |
| 8 B                                                                                                                             | 3.206902                                                                                                                                                                                                                                                                                                                                                                                                                                                                                                                                                                                                                                                                                                                                                                                                                                                                                                                                                                                                                                                                                                                                                                                                                                                                                                                                                                                                                                                                                                                                                                                                                                                                                                                           | 3.111517 | 0.000000 |          |          |   |   |     |          |  |  |  |  |      |          |          |  |  |  |     |          |          |          |  |  |      |          |          |          |          |  |     |          |          |          |          |          |      |          |          |          |          |          |      |          |          |          |          |          |     |          |          |          |          |          |      |          |          |          |          |          |      |          |          |          |          |          |  |   |   |   |   |    |      |          |  |  |  |  |      |          |          |  |  |  |     |          |          |          |  |  |      |          |          |          |          |  |      |          |          |          |          |          |
| 9 B                                                                                                                             | 3.255887                                                                                                                                                                                                                                                                                                                                                                                                                                                                                                                                                                                                                                                                                                                                                                                                                                                                                                                                                                                                                                                                                                                                                                                                                                                                                                                                                                                                                                                                                                                                                                                                                                                                                                                           | 3.109806 | 1.741492 | 0.000000 |          |   |   |     |          |  |  |  |  |      |          |          |  |  |  |     |          |          |          |  |  |      |          |          |          |          |  |     |          |          |          |          |          |      |          |          |          |          |          |      |          |          |          |          |          |     |          |          |          |          |          |      |          |          |          |          |          |      |          |          |          |          |          |  |   |   |   |   |    |      |          |  |  |  |  |      |          |          |  |  |  |     |          |          |          |  |  |      |          |          |          |          |  |      |          |          |          |          |          |
| 10 B                                                                                                                            | 2.109184                                                                                                                                                                                                                                                                                                                                                                                                                                                                                                                                                                                                                                                                                                                                                                                                                                                                                                                                                                                                                                                                                                                                                                                                                                                                                                                                                                                                                                                                                                                                                                                                                                                                                                                           | 1.995037 | 2.895412 | 3.767128 | 0.000000 |   |   |     |          |  |  |  |  |      |          |          |  |  |  |     |          |          |          |  |  |      |          |          |          |          |  |     |          |          |          |          |          |      |          |          |          |          |          |      |          |          |          |          |          |     |          |          |          |          |          |      |          |          |          |          |          |      |          |          |          |          |          |  |   |   |   |   |    |      |          |  |  |  |  |      |          |          |  |  |  |     |          |          |          |  |  |      |          |          |          |          |  |      |          |          |          |          |          |

Table S3C. Energy ranking for all of the CpCoSe<sub>2</sub>B<sub>7</sub>H<sub>7</sub> optimized structures after B3LYP/6-31G(d) optimizations:

| No | Initial structure         | Final energy (a.u.) | ΔE (kcal/mol) |
|----|---------------------------|---------------------|---------------|
| 1  | 2-TetrTriPri2-Co1Se7Se1   | -6553.13534170      | 0.00          |
| 2  | 4-BicapSqAntipr-Co2Se1Se2 | -6553.13534150      | 0.00          |
| 3  | 5-Isocloso-Co3Se4Se1      | -6553.13533340      | 0.01          |
| 4  | 3-BicapCub-Co2Se1Se4      | -6553.13532950      | 0.01          |
| 5  | 2-TetrTriPri2-Co2Se4Se1   | -6553.13532350      | 0.01          |
| 6  | 2-TetrTriPri2-Co2Se1Se1   | -6553.13532050      | 0.01          |
| 7  | 3-BicapCub-Co2Se3Se1      | -6553.13531440      | 0.02          |
| 8  | 3-BicapCub-Co1Se1Se6      | -6553.13531210      | 0.02          |
| 9  | 5-Isocloso-Co2Se2Se4      | -6553.13529670      | 0.03          |
| 10 | 1-TetrTriPri1-Co3Se4Se1   | -6553.13529130      | 0.03          |
| 11 | 2-TetrTriPri2-Co2Se2Se7   | -6553.13529120      | 0.03          |
| 12 | 1-TetrTriPri1-Co2Se4Se1   | -6553.13528930      | 0.03          |
| 13 | 5-Isocloso-Co3Se2Se1      | -6553.13527520      | 0.04          |
| 14 | 4-BicapSqAntipr-Co1Se2Se3 | -6553.13527020      | 0.04          |
| 15 | 1-TetrTriPri1-Co2Se4Se2   | -6553.13521860      | 0.08          |
| 16 | 1-TetrTriPri1-Co3Se4Se2   | -6553.13521860      | 0.08          |
| 17 | 4-BicapSqAntipr-Co2Se4Se1 | -6553.13520270      | 0.09          |
| 18 | 5-Isocloso-Co2Se1Se6      | -6553.12439700      | 6.87          |
| 19 | 5-Isocloso-Co1Se1Se6      | -6553.12437410      | 6.88          |
| 20 | 5-Isocloso-Co2Se1Se4      | -6553.12437240      | 6.88          |
| 21 | 2-TetrTriPri2-Co3Se1Se2   | -6553.12437130      | 6.88          |
| 22 | 5-Isocloso-Co3Se1Se7      | -6553.12436250      | 6.89          |
| 23 | 3-BicapCub-Co2Se1Se6      | -6553.12435570      | 6.89          |
| 24 | 5-Isocloso-Co3Se3Se4      | -6553.12435540      | 6.89          |
| 25 | 1-TetrTriPri1-Co1Se1Se6   | -6553.12435200      | 6.90          |
| 26 | 2-TetrTriPri2-Co1Se1Se1   | -6553.12434100      | 6.90          |
| 27 | 2-TetrTriPri2-Co1Se4Se2   | -6553.12433340      | 6.91          |
| 28 | 4-BicapSqAntipr-Co2Se2Se5 | -6553.12432970      | 6.91          |
| 29 | 5-Isocloso-Co1Se1Se4      | -6553.12432150      | 6.92          |
| 30 | 1-TetrTriPri1-Co2Se1Se5   | -6553.12430530      | 6.93          |
| 31 | 1-TetrTriPri1-Co3Se2Se5   | -6553.12430530      | 6.93          |
| 32 | 4-BicapSqAntipr-Co2Se2Se3 | -6553.12430100      | 6.93          |
| 33 | 2-TetrTriPri2-Co2Se1Se3   | -6553.12339840      | 7.49          |
| 34 | 4-BicapSqAntipr-Co1Se1Se1 | -6553.12338530      | 7.50          |
| 35 | 2-TetrTriPri2-Co1Se2Se5   | -6553.12336690      | 7.51          |
| 36 | 3-BicapCub-Co1Se1Se1      | -6553.12237930      | 8.13          |
| 37 | 2-TetrTriPri2-Co1Se2Se1   | -6553.12057800      | 9.26          |
| 38 | 2-TetrTriPri2-Co1Se2Se2   | -6553.12054000      | 9.29          |
| 39 | 2-TetrTriPri2-Co1Se6Se2   | -6553.12053280      | 9.29          |

|    |                           |                |       |
|----|---------------------------|----------------|-------|
| 40 | 2-TetrTriPri2-Co3Se2Se3   | -6553.12053200 | 9.29  |
| 41 | 5-Isocloso-Co2Se2Se3      | -6553.12052980 | 9.29  |
| 42 | 4-BicapSqAntipr-Co2Se1Se1 | -6553.12051130 | 9.31  |
| 43 | 3-BicapCub-Co1Se1Se4      | -6553.12050130 | 9.31  |
| 44 | 1-TetrTriPri1-Co2Se1Se1   | -6553.12049660 | 9.32  |
| 45 | 5-Isocloso-Co1Se2Se7      | -6553.12048900 | 9.32  |
| 46 | 4-BicapSqAntipr-Co1Se1Se3 | -6553.12048180 | 9.32  |
| 47 | 2-TetrTriPri2-Co1Se6Se3   | -6553.12048130 | 9.33  |
| 48 | 5-Isocloso-Co1Se2Se2      | -6553.12046310 | 9.34  |
| 49 | 5-Isocloso-Co3Se3Se2      | -6553.11465660 | 12.98 |
| 50 | 5-Isocloso-Co3Se2Se2      | -6553.11465470 | 12.98 |
| 51 | 2-TetrTriPri2-Co2Se2Se1   | -6553.11464220 | 12.99 |
| 52 | 5-Isocloso-Co2Se1Se7      | -6553.11463960 | 12.99 |
| 53 | 5-Isocloso-Co2Se3Se4      | -6553.11463790 | 12.99 |
| 54 | 5-Isocloso-Co3Se1Se2      | -6553.11463170 | 13.00 |
| 55 | 2-TetrTriPri2-Co2Se3Se4   | -6553.11462120 | 13.00 |
| 56 | 5-Isocloso-Co2Se3Se1      | -6553.11458200 | 13.03 |
| 57 | 4-BicapSqAntipr-Co2Se3Se4 | -6553.11454600 | 13.05 |
| 58 | 2-TetrTriPri2-Co3Se3Se6   | -6553.11160530 | 14.90 |
| 59 | 2-TetrTriPri2-Co3Se4Se4   | -6553.11159030 | 14.90 |
| 60 | 2-TetrTriPri2-Co2Se1Se8   | -6553.11158910 | 14.91 |
| 61 | 1-TetrTriPri1-Co2Se2Se2   | -6553.11158420 | 14.91 |
| 62 | 1-TetrTriPri1-Co3Se1Se4   | -6553.11158420 | 14.91 |
| 63 | 4-BicapSqAntipr-Co2Se1Se7 | -6553.11158040 | 14.91 |
| 64 | 3-BicapCub-Co2Se2Se1      | -6553.11157420 | 14.91 |
| 65 | 2-TetrTriPri2-Co3Se2Se6   | -6553.11157000 | 14.92 |
| 66 | 2-TetrTriPri2-Co3Se1Se1   | -6553.11047710 | 15.60 |
| 67 | 1-TetrTriPri1-Co2Se4Se3   | -6553.11047410 | 15.60 |
| 68 | 1-TetrTriPri1-Co3Se4Se3   | -6553.11047410 | 15.60 |
| 69 | 2-TetrTriPri2-Co2Se1Se6   | -6553.11044540 | 15.62 |
| 70 | 2-TetrTriPri2-Co2Se1Se2   | -6553.11037500 | 15.67 |
| 71 | 5-Isocloso-Co3Se3Se1      | -6553.11035350 | 15.68 |
| 72 | 5-Isocloso-Co2Se1Se5      | -6553.10863270 | 16.76 |
| 73 | 4-BicapSqAntipr-Co2Se2Se1 | -6553.10862360 | 16.77 |
| 74 | 1-TetrTriPri1-Co1Se1Se2   | -6553.10858830 | 16.79 |
| 75 | 2-TetrTriPri2-Co1Se2Se6   | -6553.10858460 | 16.79 |
| 76 | 2-TetrTriPri2-Co1Se6Se1   | -6553.10857490 | 16.80 |
| 77 | 2-TetrTriPri2-Co2Se1Se7   | -6553.10853790 | 16.82 |
| 78 | 2-TetrTriPri2-Co2Se1Se4   | -6553.10590080 | 18.47 |
| 79 | 1-TetrTriPri1-Co2Se3Se1   | -6553.10589660 | 18.48 |
| 80 | 1-TetrTriPri1-Co3Se3Se1   | -6553.10589660 | 18.48 |
| 81 | 2-TetrTriPri2-Co2Se2Se3   | -6553.10589650 | 18.48 |
| 82 | 4-BicapSqAntipr-Co2Se1Se8 | -6553.10589080 | 18.48 |



|     |                           |                |       |
|-----|---------------------------|----------------|-------|
| 83  | 5-Isocloso-Co3Se1Se3      | -6553.10585470 | 18.50 |
| 84  | 5-Isocloso-Co2Se4Se2      | -6553.10391180 | 19.72 |
| 85  | 4-BicapSqAntipr-Co1Se1Se5 | -6553.10390940 | 19.72 |
| 86  | 5-Isocloso-Co2Se5Se1      | -6553.10390760 | 19.73 |
| 87  | 5-Isocloso-Co1Se4Se2      | -6553.10388950 | 19.74 |
| 88  | 2-TetrTriPri2-Co3Se1Se5   | -6553.10388930 | 19.74 |
| 89  | 5-Isocloso-Co1Se1Se2      | -6553.10387180 | 19.75 |
| 90  | 1-TetrTriPri1-Co2Se6Se1   | -6553.10271790 | 20.47 |
| 91  | 1-TetrTriPri1-Co2Se7Se1   | -6553.10271790 | 20.47 |
| 92  | 1-TetrTriPri1-Co3Se6Se2   | -6553.10271790 | 20.47 |
| 93  | 5-Isocloso-Co3Se2Se3      | -6553.10104110 | 21.52 |
| 94  | 2-TetrTriPri2-Co2Se3Se6   | -6553.10101980 | 21.54 |
| 95  | 1-TetrTriPri1-Co1Se2Se3   | -6553.10101550 | 21.54 |
| 96  | 4-BicapSqAntipr-Co2Se3Se5 | -6553.10101030 | 21.54 |
| 97  | 2-TetrTriPri2-Co1Se7Se2   | -6553.10097200 | 21.57 |
| 98  | 3-BicapCub-Co2Se4Se1      | -6553.10097080 | 21.57 |
| 99  | 1-TetrTriPri1-Co2Se5Se3   | -6553.10095680 | 21.58 |
| 100 | 1-TetrTriPri1-Co3Se5Se2   | -6553.10095680 | 21.58 |
| 101 | 3-BicapCub-Co2Se2Se2      | -6553.10094590 | 21.58 |
| 102 | 1-TetrTriPri1-Co1Se2Se4   | -6553.10090630 | 21.61 |
| 103 | 1-TetrTriPri1-Co1Se3Se5   | -6553.10090100 | 21.61 |
| 104 | 2-TetrTriPri2-Co1Se3Se5   | -6553.10088970 | 21.62 |
| 105 | 2-TetrTriPri2-Co3Se4Se3   | -6553.10087740 | 21.63 |
| 106 | 2-TetrTriPri2-Co3Se2Se7   | -6553.10086870 | 21.63 |
| 107 | 2-TetrTriPri2-Co2Se3Se5   | -6553.10084650 | 21.65 |
| 108 | 5-Isocloso-Co2Se1Se3      | -6553.09935610 | 22.58 |
| 109 | 1-TetrTriPri1-Co2Se1Se3   | -6553.09931430 | 22.61 |
| 110 | 1-TetrTriPri1-Co3Se2Se2   | -6553.09931430 | 22.61 |
| 111 | 2-TetrTriPri2-Co1Se1Se4   | -6553.09931070 | 22.61 |
| 112 | 3-BicapCub-Co2Se1Se1      | -6553.09931010 | 22.61 |
| 113 | 5-Isocloso-Co3Se1Se1      | -6553.09927230 | 22.63 |
| 114 | 4-BicapSqAntipr-Co2Se1Se6 | -6553.09922780 | 22.66 |
| 115 | 1-TetrTriPri1-Co1Se4Se2   | -6553.09917880 | 22.69 |
| 116 | 2-TetrTriPri2-Co3Se2Se1   | -6553.09910550 | 22.74 |
| 117 | 1-TetrTriPri1-Co1Se1Se5   | -6553.09909720 | 22.74 |
| 118 | 3-BicapCub-Co2Se3Se2      | -6553.09697520 | 24.08 |
| 119 | 2-TetrTriPri2-Co2Se3Se3   | -6553.09696000 | 24.09 |
| 120 | 1-TetrTriPri1-Co1Se1Se7   | -6553.09695510 | 24.09 |
| 121 | 2-TetrTriPri2-Co2Se5Se1   | -6553.09694200 | 24.10 |
| 122 | 5-Isocloso-Co1Se2Se5      | -6553.09693810 | 24.10 |
| 123 | 2-TetrTriPri2-Co1Se5Se2   | -6553.09692700 | 24.11 |
| 124 | 4-BicapSqAntipr-Co2Se3Se3 | -6553.09692650 | 24.11 |
| 125 | 1-TetrTriPri1-Co1Se3Se2   | -6553.09692470 | 24.11 |

|     |                           |                |       |
|-----|---------------------------|----------------|-------|
| 126 | 4-BicapSqAntipr-Co2Se5Se1 | -6553.09692300 | 24.11 |
| 127 | 5-Isocloso-Co3Se5Se1      | -6553.09692020 | 24.11 |
| 128 | 5-Isocloso-Co1Se5Se1      | -6553.09688460 | 24.13 |
| 129 | 5-Isocloso-Co1Se3Se4      | -6553.09688270 | 24.13 |
| 130 | 5-Isocloso-Co1Se3Se6      | -6553.09688070 | 24.14 |
| 131 | 5-Isocloso-Co3Se2Se6      | -6553.09687970 | 24.14 |
| 132 | 5-Isocloso-Co1Se3Se3      | -6553.09687780 | 24.14 |
| 133 | 2-TetrTriPri2-Co1Se3Se6   | -6553.09687760 | 24.14 |
| 134 | 5-Isocloso-Co2Se2Se6      | -6553.09659270 | 24.32 |
| 135 | 2-TetrTriPri2-Co1Se8Se1   | -6553.09656520 | 24.33 |
| 136 | 4-BicapSqAntipr-Co2Se1Se5 | -6553.09656400 | 24.33 |
| 137 | 2-TetrTriPri2-Co1Se3Se1   | -6553.09654320 | 24.35 |
| 138 | 3-BicapCub-Co1Se2Se1      | -6553.09653700 | 24.35 |
| 139 | 4-BicapSqAntipr-Co1Se2Se1 | -6553.09653140 | 24.35 |
| 140 | 5-Isocloso-Co2Se2Se1      | -6553.09653050 | 24.35 |
| 141 | 1-TetrTriPri1-Co2Se1Se2   | -6553.09580540 | 24.81 |
| 142 | 1-TetrTriPri1-Co3Se2Se1   | -6553.09580540 | 24.81 |
| 143 | 5-Isocloso-Co1Se2Se3      | -6553.09514600 | 25.22 |
| 144 | 4-BicapSqAntipr-Co2Se2Se2 | -6553.09511400 | 25.24 |
| 145 | 5-Isocloso-Co1Se1Se1      | -6553.09508020 | 25.26 |
| 146 | 1-TetrTriPri1-Co1Se2Se1   | -6553.09507160 | 25.27 |
| 147 | 5-Isocloso-Co1Se1Se3      | -6553.09506790 | 25.27 |
| 148 | 5-Isocloso-Co2Se2Se2      | -6553.09378230 | 26.08 |
| 149 | 5-Isocloso-Co3Se2Se5      | -6553.09124120 | 27.67 |
| 150 | 3-BicapCub-Co2Se6Se1      | -6553.09122570 | 27.68 |
| 151 | 2-TetrTriPri2-Co1Se3Se2   | -6553.09122150 | 27.69 |
| 152 | 3-BicapCub-Co2Se5Se1      | -6553.09121530 | 27.69 |
| 153 | 2-TetrTriPri2-Co1Se1Se8   | -6553.09120860 | 27.69 |
| 154 | 5-Isocloso-Co3Se1Se8      | -6553.09115830 | 27.73 |
| 155 | 1-TetrTriPri1-Co2Se1Se4   | -6553.09082250 | 27.94 |
| 156 | 1-TetrTriPri1-Co3Se2Se3   | -6553.09082250 | 27.94 |
| 157 | 1-TetrTriPri1-Co2Se2Se6   | -6553.09078260 | 27.96 |
| 158 | 1-TetrTriPri1-Co3Se1Se6   | -6553.09078260 | 27.96 |
| 159 | 3-BicapCub-Co2Se1Se3      | -6553.09077070 | 27.97 |
| 160 | 2-TetrTriPri2-Co1Se2Se3   | -6553.08985400 | 28.54 |
| 161 | 2-TetrTriPri2-Co1Se1Se6   | -6553.08983550 | 28.56 |
| 162 | 1-TetrTriPri1-Co1Se4Se3   | -6553.08982770 | 28.56 |
| 163 | 5-Isocloso-Co2Se4Se1      | -6553.08982550 | 28.56 |
| 164 | 1-TetrTriPri1-Co1Se1Se8   | -6553.08978320 | 28.59 |
| 165 | 2-TetrTriPri2-Co3Se3Se4   | -6553.08908860 | 29.02 |
| 166 | 4-BicapSqAntipr-Co2Se1Se4 | -6553.08907120 | 29.04 |
| 167 | 4-BicapSqAntipr-Co2Se4Se2 | -6553.08907050 | 29.04 |
| 168 | 3-BicapCub-Co1Se1Se5      | -6553.08906650 | 29.04 |

|     |                           |                |       |
|-----|---------------------------|----------------|-------|
| 169 | 2-TetrTriPri2-Co3Se1Se4   | -6553.08906530 | 29.04 |
| 170 | 5-Isocloso-Co1Se2Se6      | -6553.08906450 | 29.04 |
| 171 | 2-TetrTriPri2-Co1Se1Se3   | -6553.08905960 | 29.04 |
| 172 | 2-TetrTriPri2-Co1Se3Se4   | -6553.08905960 | 29.04 |
| 173 | 5-Isocloso-Co2Se2Se5      | -6553.08905690 | 29.04 |
| 174 | 2-TetrTriPri2-Co1Se4Se4   | -6553.08904120 | 29.05 |
| 175 | 4-BicapSqAntipr-Co2Se2Se7 | -6553.08903890 | 29.06 |
| 176 | 2-TetrTriPri2-Co3Se2Se5   | -6553.08903650 | 29.06 |
| 177 | 5-Isocloso-Co1Se4Se1      | -6553.08902840 | 29.06 |
| 178 | 5-Isocloso-Co2Se1Se8      | -6553.08902500 | 29.06 |
| 179 | 2-TetrTriPri2-Co1Se2Se7   | -6553.08901500 | 29.07 |
| 180 | 5-Isocloso-Co1Se1Se8      | -6553.08900970 | 29.07 |
| 181 | 4-BicapSqAntipr-Co2Se2Se4 | -6553.08869070 | 29.27 |
| 182 | 5-Isocloso-Co1Se1Se7      | -6553.08868670 | 29.28 |
| 183 | 2-TetrTriPri2-Co1Se5Se1   | -6553.08867680 | 29.28 |
| 184 | 4-BicapSqAntipr-Co2Se3Se2 | -6553.08866490 | 29.29 |
| 185 | 5-Isocloso-Co2Se3Se3      | -6553.08864830 | 29.30 |
| 186 | 4-BicapSqAntipr-Co2Se2Se6 | -6553.08863970 | 29.31 |
| 187 | 2-TetrTriPri2-Co1Se2Se4   | -6553.08863710 | 29.31 |
| 188 | 1-TetrTriPri1-Co1Se3Se1   | -6553.08863190 | 29.31 |
| 189 | 5-Isocloso-Co1Se3Se5      | -6553.08860250 | 29.33 |
| 190 | 5-Isocloso-Co1Se3Se2      | -6553.08857860 | 29.34 |
| 191 | 5-Isocloso-Co1Se1Se5      | -6553.08857360 | 29.35 |
| 192 | 3-BicapCub-Co2Se3Se3      | -6553.08852990 | 29.38 |
| 193 | 2-TetrTriPri2-Co2Se2Se6   | -6553.08558820 | 31.22 |
| 194 | 2-TetrTriPri2-Co1Se1Se7   | -6553.08555750 | 31.24 |
| 195 | 2-TetrTriPri2-Co1Se4Se3   | -6553.08554940 | 31.25 |
| 196 | 1-TetrTriPri1-Co1Se1Se3   | -6553.08552080 | 31.26 |
| 197 | 5-Isocloso-Co3Se3Se5      | -6553.08411360 | 32.15 |
| 198 | 3-BicapCub-Co2Se1Se5      | -6553.08402900 | 32.20 |
| 199 | 1-TetrTriPri1-Co2Se2Se3   | -6553.08401680 | 32.21 |
| 200 | 1-TetrTriPri1-Co3Se1Se3   | -6553.08401680 | 32.21 |
| 201 | 1-TetrTriPri1-Co1Se3Se3   | -6553.08400540 | 32.21 |
| 202 | 5-Isocloso-Co3Se1Se5      | -6553.08373380 | 32.38 |
| 203 | 1-TetrTriPri1-Co2Se6Se3   | -6553.08372740 | 32.39 |
| 204 | 1-TetrTriPri1-Co2Se8Se1   | -6553.08372740 | 32.39 |
| 205 | 1-TetrTriPri1-Co3Se6Se3   | -6553.08372740 | 32.39 |
| 206 | 2-TetrTriPri2-Co3Se5Se1   | -6553.08372280 | 32.39 |
| 207 | 2-TetrTriPri2-Co1Se1Se5   | -6553.08370590 | 32.40 |
| 208 | 2-TetrTriPri2-Co3Se3Se3   | -6553.08370260 | 32.40 |
| 209 | 3-BicapCub-Co2Se4Se3      | -6553.08368600 | 32.41 |
| 210 | 2-TetrTriPri2-Co1Se4Se1   | -6553.08367380 | 32.42 |
| 211 | 3-BicapCub-Co1Se1Se2      | -6553.08253960 | 33.13 |

|     |                           |                |       |
|-----|---------------------------|----------------|-------|
| 212 | 4-BicapSqAntipr-Co1Se1Se2 | -6553.08253100 | 33.14 |
| 213 | 2-TetrTriPri2-Co3Se3Se5   | -6553.08251020 | 33.15 |
| 214 | 1-TetrTriPri1-Co2Se3Se4   | -6553.08249660 | 33.16 |
| 215 | 3-BicapCub-Co2Se1Se2      | -6553.08132550 | 33.90 |
| 216 | 2-TetrTriPri2-Co3Se4Se1   | -6553.08091460 | 34.15 |
| 217 | 2-TetrTriPri2-Co3Se1Se3   | -6553.08055740 | 34.38 |
| 218 | 1-TetrTriPri1-Co1Se3Se4   | -6553.08051890 | 34.40 |
| 219 | 5-Isocloso-Co3Se1Se4      | -6553.08051120 | 34.41 |
| 220 | 1-TetrTriPri1-Co1Se2Se7   | -6553.08050290 | 34.41 |
| 221 | 2-TetrTriPri2-Co2Se1Se5   | -6553.08049480 | 34.42 |
| 222 | 5-Isocloso-Co3Se3Se6      | -6553.08049360 | 34.42 |
| 223 | 3-BicapCub-Co2Se2Se5      | -6553.08049180 | 34.42 |
| 224 | 2-TetrTriPri2-Co2Se3Se1   | -6553.08048560 | 34.42 |
| 225 | 1-TetrTriPri1-Co1Se4Se4   | -6553.08047510 | 34.43 |
| 226 | 3-BicapCub-Co2Se5Se2      | -6553.08047190 | 34.43 |
| 227 | 5-Isocloso-Co3Se2Se7      | -6553.08046730 | 34.43 |
| 228 | 2-TetrTriPri2-Co2Se4Se2   | -6553.08043870 | 34.45 |
| 229 | 5-Isocloso-Co3Se4Se2      | -6553.08043100 | 34.46 |
| 230 | 1-TetrTriPri1-Co2Se3Se6   | -6553.07603770 | 37.21 |
| 231 | 1-TetrTriPri1-Co3Se3Se6   | -6553.07603640 | 37.22 |
| 232 | 3-BicapCub-Co1Se2Se2      | -6553.07580520 | 37.36 |
| 233 | 4-BicapSqAntipr-Co1Se2Se2 | -6553.07579810 | 37.36 |
| 234 | 5-Isocloso-Co2Se3Se6      | -6553.07575460 | 37.39 |
| 235 | 5-Isocloso-Co2Se2Se7      | -6553.07574940 | 37.40 |
| 236 | 5-Isocloso-Co2Se3Se2      | -6553.07570260 | 37.42 |
| 237 | 4-BicapSqAntipr-Co2Se3Se6 | -6553.07570020 | 37.43 |
| 238 | 2-TetrTriPri2-Co1Se5Se3   | -6553.07569390 | 37.43 |
| 239 | 4-BicapSqAntipr-Co2Se1Se3 | -6553.07567170 | 37.44 |
| 240 | 2-TetrTriPri2-Co2Se2Se5   | -6553.07240580 | 39.49 |
| 241 | 5-Isocloso-Co3Se2Se4      | -6553.07052930 | 40.67 |
| 242 | 1-TetrTriPri1-Co2Se7Se2   | -6553.07051580 | 40.68 |
| 243 | 1-TetrTriPri1-Co3Se7Se2   | -6553.07051490 | 40.68 |
| 244 | 3-BicapCub-Co2Se4Se2      | -6553.07050260 | 40.69 |
| 245 | 5-Isocloso-Co3Se3Se3      | -6553.07035460 | 40.78 |
| 246 | 1-TetrTriPri1-Co3Se4Se5   | -6553.06895030 | 41.66 |
| 247 | 1-TetrTriPri1-Co2Se4Se5   | -6553.06894860 | 41.66 |
| 248 | 1-TetrTriPri1-Co1Se2Se5   | -6553.06892500 | 41.68 |
| 249 | 1-TetrTriPri1-Co1Se1Se4   | -6553.06888490 | 41.70 |
| 250 | 1-TetrTriPri1-Co1Se4Se5   | -6553.06887440 | 41.71 |
| 251 | 3-BicapCub-Co2Se5Se3      | -6553.06860410 | 41.88 |
| 252 | 2-TetrTriPri2-Co3Se2Se2   | -6553.06793030 | 42.30 |
| 253 | 5-Isocloso-Co1Se3Se1      | -6553.06790010 | 42.32 |
| 254 | 5-Isocloso-Co1Se2Se1      | -6553.06786960 | 42.34 |

|     |                           |                |       |
|-----|---------------------------|----------------|-------|
| 255 | 1-TetrTriPri1-Co1Se2Se6   | -6553.06786260 | 42.34 |
| 256 | 4-BicapSqAntipr-Co2Se3Se1 | -6553.06785550 | 42.35 |
| 257 | 5-Isocloso-Co1Se2Se4      | -6553.06780130 | 42.38 |
| 258 | 2-TetrTriPri2-Co3Se2Se4   | -6553.06212050 | 45.95 |
| 259 | 1-TetrTriPri1-Co1Se2Se2   | -6553.06202930 | 46.00 |
| 260 | 4-BicapSqAntipr-Co1Se1Se4 | -6553.06009290 | 47.22 |
| 261 | 1-TetrTriPri1-Co2Se1Se8   | -6553.05946630 | 47.61 |
| 262 | 1-TetrTriPri1-Co3Se2Se4   | -6553.05946630 | 47.61 |
| 263 | 1-TetrTriPri1-Co2Se6Se2   | -6553.05911580 | 47.83 |
| 264 | 1-TetrTriPri1-Co3Se6Se1   | -6553.05911580 | 47.83 |
| 265 | 5-Isocloso-Co2Se1Se1      | -6553.05788270 | 48.61 |
| 266 | 2-TetrTriPri2-Co2Se2Se2   | -6553.05731400 | 48.96 |
| 267 | 1-TetrTriPri1-Co2Se2Se4   | -6553.05596630 | 49.81 |
| 268 | 1-TetrTriPri1-Co3Se1Se5   | -6553.05596630 | 49.81 |
| 269 | 1-TetrTriPri1-Co3Se1Se7   | -6553.05596630 | 49.81 |
| 270 | 3-BicapCub-Co1Se1Se3      | -6553.05487420 | 50.49 |
| 271 | 1-TetrTriPri1-Co3Se2Se6   | -6553.05359750 | 51.30 |
| 272 | 1-TetrTriPri1-Co2Se1Se6   | -6553.05357030 | 51.31 |
| 273 | 1-TetrTriPri1-Co3Se3Se2   | -6553.05221040 | 52.17 |
| 274 | 1-TetrTriPri1-Co2Se3Se2   | -6553.05220910 | 52.17 |
| 275 | 2-TetrTriPri2-Co3Se3Se1   | -6553.05214580 | 52.21 |
| 276 | 1-TetrTriPri1-Co2Se1Se7   | -6553.05164590 | 52.52 |
| 277 | 1-TetrTriPri1-Co3Se2Se7   | -6553.05164590 | 52.52 |
| 278 | 2-TetrTriPri2-Co2Se2Se4   | -6553.05078100 | 53.06 |
| 279 | 2-TetrTriPri2-Co2Se3Se2   | -6553.05077550 | 53.07 |
| 280 | 5-Isocloso-Co2Se1Se2      | -6553.04980680 | 53.67 |
| 281 | 2-TetrTriPri2-Co1Se1Se2   | -6553.04938860 | 53.94 |
| 282 | 2-TetrTriPri2-Co1Se4Se5   | -6553.04935220 | 53.96 |
| 283 | 1-TetrTriPri1-Co2Se5Se4   | -6553.04834600 | 54.59 |
| 284 | 1-TetrTriPri1-Co3Se5Se4   | -6553.04834600 | 54.59 |
| 285 | 3-BicapCub-Co2Se2Se4      | -6553.04832180 | 54.61 |
| 286 | 3-BicapCub-Co1Se2Se3      | -6553.04819010 | 54.69 |
| 287 | 1-TetrTriPri1-Co2Se5Se2   | -6553.04764420 | 55.03 |
| 288 | 1-TetrTriPri1-Co3Se5Se3   | -6553.04763450 | 55.04 |
| 289 | 1-TetrTriPri1-Co1Se3Se6   | -6553.04700320 | 55.43 |
| 290 | 2-TetrTriPri2-Co3Se3Se2   | -6553.04561510 | 56.31 |
| 291 | 1-TetrTriPri1-Co3Se3Se4   | -6553.04538850 | 56.45 |
| 292 | 2-TetrTriPri2-Co3Se4Se5   | -6553.04384640 | 57.42 |
| 293 | 1-TetrTriPri1-Co2Se2Se7   | -6553.04290050 | 58.01 |
| 294 | 1-TetrTriPri1-Co3Se1Se8   | -6553.04290050 | 58.01 |
| 295 | 2-TetrTriPri2-Co1Se5Se4   | -6553.03677790 | 61.85 |
| 296 | 2-TetrTriPri2-Co1Se3Se3   | -6553.03674690 | 61.87 |
| 297 | 5-Isocloso-Co3Se1Se6      | -6553.03635040 | 62.12 |

|     |                         |                |        |
|-----|-------------------------|----------------|--------|
| 298 | 1-TetrTriPri1-Co1Se1Se1 | -6553.03238400 | 64.61  |
| 299 | 1-TetrTriPri1-Co3Se1Se1 | -6553.02910280 | 66.67  |
| 300 | 1-TetrTriPri1-Co3Se3Se5 | -6553.02660800 | 68.23  |
| 301 | 1-TetrTriPri1-Co2Se3Se5 | -6553.02651710 | 68.29  |
| 302 | 3-BicapCub-Co2Se2Se3    | -6553.02593460 | 68.66  |
| 303 | 2-TetrTriPri2-Co3Se4Se2 | -6553.02374680 | 70.03  |
| 304 | 1-TetrTriPri1-Co2Se5Se1 | -6553.02368730 | 70.07  |
| 305 | 1-TetrTriPri1-Co3Se5Se1 | -6553.02368710 | 70.07  |
| 306 | 1-TetrTriPri1-Co3Se7Se1 | -6553.02267950 | 70.70  |
| 307 | 1-TetrTriPri1-Co3Se4Se4 | -6553.02178450 | 71.26  |
| 308 | 1-TetrTriPri1-Co2Se4Se4 | -6553.02178050 | 71.26  |
| 309 | 1-TetrTriPri1-Co1Se4Se1 | -6553.01791220 | 73.69  |
| 310 | 1-TetrTriPri1-Co3Se1Se2 | -6553.00850780 | 79.59  |
| 311 | 1-TetrTriPri1-Co2Se2Se1 | -6553.00850490 | 79.59  |
| 312 | 5-Isocloso-Co2Se3Se5    | -6553.00708180 | 80.49  |
| 313 | 3-BicapCub-Co2Se3Se4    | -6553.00632360 | 80.96  |
| 314 | 1-TetrTriPri1-Co3Se8Se1 | -6553.00293550 | 83.09  |
| 315 | 1-TetrTriPri1-Co3Se3Se3 | -6552.99588730 | 87.51  |
| 316 | 1-TetrTriPri1-Co2Se3Se3 | -6552.99588710 | 87.51  |
| 317 | 1-TetrTriPri1-Co2Se2Se5 | -6552.97424710 | 101.09 |

Table S4A. Initial CpCoSe<sub>2</sub>B<sub>8</sub>H<sub>8</sub> structures, 120 structures.

|                                                                                     |
|-------------------------------------------------------------------------------------|
| 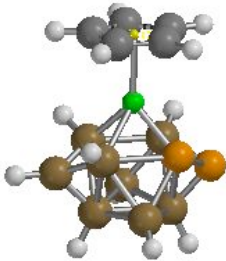   |
| 1. Pentacapped trigonal prism 54 structures                                         |
|    |
| 2. Tricapped cubeA (C <sub>2v</sub> ) 139 structures                                |
|   |
| 2b. Tricapped cubeA (C <sub>3v</sub> ) 124 structures                               |
|  |
| 4. Edge-coalesced icosahedrons (icosahedron without a vertex) 163 structures        |

Table S4B. Distance table for the lowest-lying CpCoSe<sub>2</sub>B<sub>8</sub>H<sub>8</sub> structures after M06L/6-311G(d,p) optimization. Included are the ZPcorrected E (a.u.), relative energy (kcal/mol) and symmetry. For clarity only the atoms forming the cluster framework are presented.

| 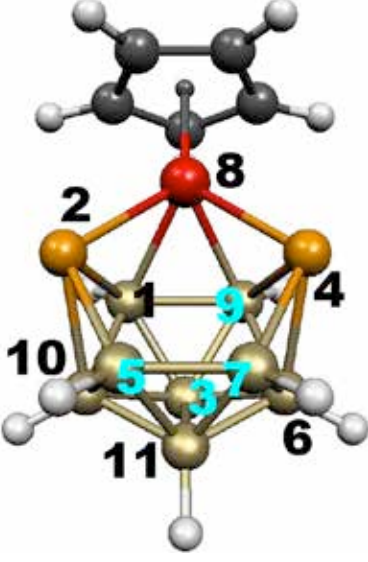 <p>1. -6582.8292076 0.0 C<sub>s</sub></p>    | <table border="1"> <thead> <tr> <th></th> <th>1</th> <th>2</th> <th>3</th> <th>4</th> <th>5</th> </tr> </thead> <tbody> <tr><td>1 B</td><td>0.000000</td><td></td><td></td><td></td><td></td></tr> <tr><td>2 Se</td><td>2.121775</td><td>0.000000</td><td></td><td></td><td></td></tr> <tr><td>3 B</td><td>1.744191</td><td>3.195756</td><td>0.000000</td><td></td><td></td></tr> <tr><td>4 Se</td><td>3.252640</td><td>3.397625</td><td>3.195714</td><td>0.000000</td><td></td></tr> <tr><td>5 B</td><td>3.024699</td><td>2.040606</td><td>2.894301</td><td>3.170333</td><td>0.000000</td></tr> <tr><td>6 B</td><td>2.939124</td><td>3.766280</td><td>1.761177</td><td>2.103939</td><td>2.889037</td></tr> <tr><td>7 B</td><td>3.499728</td><td>3.170261</td><td>2.894294</td><td>2.040643</td><td>1.732573</td></tr> <tr><td>8 Co</td><td>2.108663</td><td>2.334326</td><td>3.299203</td><td>2.334361</td><td>3.553249</td></tr> <tr><td>9 B</td><td>1.788851</td><td>3.252640</td><td>1.744177</td><td>2.121724</td><td>3.499735</td></tr> <tr><td>10 B</td><td>1.870970</td><td>2.103971</td><td>1.761177</td><td>3.766292</td><td>1.835894</td></tr> <tr><td>11 B</td><td>2.913134</td><td>3.177265</td><td>1.780701</td><td>3.177275</td><td>1.746476</td></tr> <tr> <td></td> <td>6</td> <td>7</td> <td>8</td> <td>9</td> <td>10</td> </tr> <tr><td>6 B</td><td>0.000000</td><td></td><td></td><td></td><td></td></tr> <tr><td>7 B</td><td>1.835872</td><td>0.000000</td><td></td><td></td><td></td></tr> <tr><td>8 Co</td><td>3.454720</td><td>3.553243</td><td>0.000000</td><td></td><td></td></tr> <tr><td>9 B</td><td>1.871018</td><td>3.024699</td><td>2.108670</td><td>0.000000</td><td></td></tr> <tr><td>10 B</td><td>2.872089</td><td>2.889049</td><td>3.454681</td><td>2.939093</td><td>0.000000</td></tr> <tr><td>11 B</td><td>1.739730</td><td>1.746483</td><td>3.983485</td><td>2.913137</td><td>1.739752</td></tr> </tbody> </table> |          | 1        | 2        | 3        | 4 | 5 | 1 B  | 0.000000 |  |  |  |  | 2 Se | 2.121775 | 0.000000 |  |  |  | 3 B  | 1.744191 | 3.195756 | 0.000000 |  |  | 4 Se | 3.252640 | 3.397625 | 3.195714 | 0.000000 |  | 5 B | 3.024699 | 2.040606 | 2.894301 | 3.170333 | 0.000000 | 6 B | 2.939124 | 3.766280 | 1.761177 | 2.103939 | 2.889037 | 7 B | 3.499728 | 3.170261 | 2.894294 | 2.040643 | 1.732573 | 8 Co | 2.108663 | 2.334326 | 3.299203 | 2.334361 | 3.553249 | 9 B | 1.788851 | 3.252640 | 1.744177 | 2.121724 | 3.499735 | 10 B | 1.870970 | 2.103971 | 1.761177 | 3.766292 | 1.835894 | 11 B | 2.913134 | 3.177265 | 1.780701 | 3.177275 | 1.746476 |  | 6 | 7 | 8 | 9 | 10 | 6 B | 0.000000 |  |  |  |  | 7 B | 1.835872 | 0.000000 |  |  |  | 8 Co | 3.454720 | 3.553243 | 0.000000 |  |  | 9 B | 1.871018 | 3.024699 | 2.108670 | 0.000000 |  | 10 B | 2.872089 | 2.889049 | 3.454681 | 2.939093 | 0.000000 | 11 B | 1.739730 | 1.746483 | 3.983485 | 2.913137 | 1.739752 |
|--------------------------------------------------------------------------------------------------------------------------------|-----------------------------------------------------------------------------------------------------------------------------------------------------------------------------------------------------------------------------------------------------------------------------------------------------------------------------------------------------------------------------------------------------------------------------------------------------------------------------------------------------------------------------------------------------------------------------------------------------------------------------------------------------------------------------------------------------------------------------------------------------------------------------------------------------------------------------------------------------------------------------------------------------------------------------------------------------------------------------------------------------------------------------------------------------------------------------------------------------------------------------------------------------------------------------------------------------------------------------------------------------------------------------------------------------------------------------------------------------------------------------------------------------------------------------------------------------------------------------------------------------------------------------------------------------------------------------------------------------------------------------------------------------------------------------------------------------------------------------------------------------------------------------------------------------------------------------------------------------------------------------------------------------------------------------------------------------------|----------|----------|----------|----------|---|---|------|----------|--|--|--|--|------|----------|----------|--|--|--|------|----------|----------|----------|--|--|------|----------|----------|----------|----------|--|-----|----------|----------|----------|----------|----------|-----|----------|----------|----------|----------|----------|-----|----------|----------|----------|----------|----------|------|----------|----------|----------|----------|----------|-----|----------|----------|----------|----------|----------|------|----------|----------|----------|----------|----------|------|----------|----------|----------|----------|----------|--|---|---|---|---|----|-----|----------|--|--|--|--|-----|----------|----------|--|--|--|------|----------|----------|----------|--|--|-----|----------|----------|----------|----------|--|------|----------|----------|----------|----------|----------|------|----------|----------|----------|----------|----------|
|                                                                                                                                | 1                                                                                                                                                                                                                                                                                                                                                                                                                                                                                                                                                                                                                                                                                                                                                                                                                                                                                                                                                                                                                                                                                                                                                                                                                                                                                                                                                                                                                                                                                                                                                                                                                                                                                                                                                                                                                                                                                                                                                         | 2        | 3        | 4        | 5        |   |   |      |          |  |  |  |  |      |          |          |  |  |  |      |          |          |          |  |  |      |          |          |          |          |  |     |          |          |          |          |          |     |          |          |          |          |          |     |          |          |          |          |          |      |          |          |          |          |          |     |          |          |          |          |          |      |          |          |          |          |          |      |          |          |          |          |          |  |   |   |   |   |    |     |          |  |  |  |  |     |          |          |  |  |  |      |          |          |          |  |  |     |          |          |          |          |  |      |          |          |          |          |          |      |          |          |          |          |          |
| 1 B                                                                                                                            | 0.000000                                                                                                                                                                                                                                                                                                                                                                                                                                                                                                                                                                                                                                                                                                                                                                                                                                                                                                                                                                                                                                                                                                                                                                                                                                                                                                                                                                                                                                                                                                                                                                                                                                                                                                                                                                                                                                                                                                                                                  |          |          |          |          |   |   |      |          |  |  |  |  |      |          |          |  |  |  |      |          |          |          |  |  |      |          |          |          |          |  |     |          |          |          |          |          |     |          |          |          |          |          |     |          |          |          |          |          |      |          |          |          |          |          |     |          |          |          |          |          |      |          |          |          |          |          |      |          |          |          |          |          |  |   |   |   |   |    |     |          |  |  |  |  |     |          |          |  |  |  |      |          |          |          |  |  |     |          |          |          |          |  |      |          |          |          |          |          |      |          |          |          |          |          |
| 2 Se                                                                                                                           | 2.121775                                                                                                                                                                                                                                                                                                                                                                                                                                                                                                                                                                                                                                                                                                                                                                                                                                                                                                                                                                                                                                                                                                                                                                                                                                                                                                                                                                                                                                                                                                                                                                                                                                                                                                                                                                                                                                                                                                                                                  | 0.000000 |          |          |          |   |   |      |          |  |  |  |  |      |          |          |  |  |  |      |          |          |          |  |  |      |          |          |          |          |  |     |          |          |          |          |          |     |          |          |          |          |          |     |          |          |          |          |          |      |          |          |          |          |          |     |          |          |          |          |          |      |          |          |          |          |          |      |          |          |          |          |          |  |   |   |   |   |    |     |          |  |  |  |  |     |          |          |  |  |  |      |          |          |          |  |  |     |          |          |          |          |  |      |          |          |          |          |          |      |          |          |          |          |          |
| 3 B                                                                                                                            | 1.744191                                                                                                                                                                                                                                                                                                                                                                                                                                                                                                                                                                                                                                                                                                                                                                                                                                                                                                                                                                                                                                                                                                                                                                                                                                                                                                                                                                                                                                                                                                                                                                                                                                                                                                                                                                                                                                                                                                                                                  | 3.195756 | 0.000000 |          |          |   |   |      |          |  |  |  |  |      |          |          |  |  |  |      |          |          |          |  |  |      |          |          |          |          |  |     |          |          |          |          |          |     |          |          |          |          |          |     |          |          |          |          |          |      |          |          |          |          |          |     |          |          |          |          |          |      |          |          |          |          |          |      |          |          |          |          |          |  |   |   |   |   |    |     |          |  |  |  |  |     |          |          |  |  |  |      |          |          |          |  |  |     |          |          |          |          |  |      |          |          |          |          |          |      |          |          |          |          |          |
| 4 Se                                                                                                                           | 3.252640                                                                                                                                                                                                                                                                                                                                                                                                                                                                                                                                                                                                                                                                                                                                                                                                                                                                                                                                                                                                                                                                                                                                                                                                                                                                                                                                                                                                                                                                                                                                                                                                                                                                                                                                                                                                                                                                                                                                                  | 3.397625 | 3.195714 | 0.000000 |          |   |   |      |          |  |  |  |  |      |          |          |  |  |  |      |          |          |          |  |  |      |          |          |          |          |  |     |          |          |          |          |          |     |          |          |          |          |          |     |          |          |          |          |          |      |          |          |          |          |          |     |          |          |          |          |          |      |          |          |          |          |          |      |          |          |          |          |          |  |   |   |   |   |    |     |          |  |  |  |  |     |          |          |  |  |  |      |          |          |          |  |  |     |          |          |          |          |  |      |          |          |          |          |          |      |          |          |          |          |          |
| 5 B                                                                                                                            | 3.024699                                                                                                                                                                                                                                                                                                                                                                                                                                                                                                                                                                                                                                                                                                                                                                                                                                                                                                                                                                                                                                                                                                                                                                                                                                                                                                                                                                                                                                                                                                                                                                                                                                                                                                                                                                                                                                                                                                                                                  | 2.040606 | 2.894301 | 3.170333 | 0.000000 |   |   |      |          |  |  |  |  |      |          |          |  |  |  |      |          |          |          |  |  |      |          |          |          |          |  |     |          |          |          |          |          |     |          |          |          |          |          |     |          |          |          |          |          |      |          |          |          |          |          |     |          |          |          |          |          |      |          |          |          |          |          |      |          |          |          |          |          |  |   |   |   |   |    |     |          |  |  |  |  |     |          |          |  |  |  |      |          |          |          |  |  |     |          |          |          |          |  |      |          |          |          |          |          |      |          |          |          |          |          |
| 6 B                                                                                                                            | 2.939124                                                                                                                                                                                                                                                                                                                                                                                                                                                                                                                                                                                                                                                                                                                                                                                                                                                                                                                                                                                                                                                                                                                                                                                                                                                                                                                                                                                                                                                                                                                                                                                                                                                                                                                                                                                                                                                                                                                                                  | 3.766280 | 1.761177 | 2.103939 | 2.889037 |   |   |      |          |  |  |  |  |      |          |          |  |  |  |      |          |          |          |  |  |      |          |          |          |          |  |     |          |          |          |          |          |     |          |          |          |          |          |     |          |          |          |          |          |      |          |          |          |          |          |     |          |          |          |          |          |      |          |          |          |          |          |      |          |          |          |          |          |  |   |   |   |   |    |     |          |  |  |  |  |     |          |          |  |  |  |      |          |          |          |  |  |     |          |          |          |          |  |      |          |          |          |          |          |      |          |          |          |          |          |
| 7 B                                                                                                                            | 3.499728                                                                                                                                                                                                                                                                                                                                                                                                                                                                                                                                                                                                                                                                                                                                                                                                                                                                                                                                                                                                                                                                                                                                                                                                                                                                                                                                                                                                                                                                                                                                                                                                                                                                                                                                                                                                                                                                                                                                                  | 3.170261 | 2.894294 | 2.040643 | 1.732573 |   |   |      |          |  |  |  |  |      |          |          |  |  |  |      |          |          |          |  |  |      |          |          |          |          |  |     |          |          |          |          |          |     |          |          |          |          |          |     |          |          |          |          |          |      |          |          |          |          |          |     |          |          |          |          |          |      |          |          |          |          |          |      |          |          |          |          |          |  |   |   |   |   |    |     |          |  |  |  |  |     |          |          |  |  |  |      |          |          |          |  |  |     |          |          |          |          |  |      |          |          |          |          |          |      |          |          |          |          |          |
| 8 Co                                                                                                                           | 2.108663                                                                                                                                                                                                                                                                                                                                                                                                                                                                                                                                                                                                                                                                                                                                                                                                                                                                                                                                                                                                                                                                                                                                                                                                                                                                                                                                                                                                                                                                                                                                                                                                                                                                                                                                                                                                                                                                                                                                                  | 2.334326 | 3.299203 | 2.334361 | 3.553249 |   |   |      |          |  |  |  |  |      |          |          |  |  |  |      |          |          |          |  |  |      |          |          |          |          |  |     |          |          |          |          |          |     |          |          |          |          |          |     |          |          |          |          |          |      |          |          |          |          |          |     |          |          |          |          |          |      |          |          |          |          |          |      |          |          |          |          |          |  |   |   |   |   |    |     |          |  |  |  |  |     |          |          |  |  |  |      |          |          |          |  |  |     |          |          |          |          |  |      |          |          |          |          |          |      |          |          |          |          |          |
| 9 B                                                                                                                            | 1.788851                                                                                                                                                                                                                                                                                                                                                                                                                                                                                                                                                                                                                                                                                                                                                                                                                                                                                                                                                                                                                                                                                                                                                                                                                                                                                                                                                                                                                                                                                                                                                                                                                                                                                                                                                                                                                                                                                                                                                  | 3.252640 | 1.744177 | 2.121724 | 3.499735 |   |   |      |          |  |  |  |  |      |          |          |  |  |  |      |          |          |          |  |  |      |          |          |          |          |  |     |          |          |          |          |          |     |          |          |          |          |          |     |          |          |          |          |          |      |          |          |          |          |          |     |          |          |          |          |          |      |          |          |          |          |          |      |          |          |          |          |          |  |   |   |   |   |    |     |          |  |  |  |  |     |          |          |  |  |  |      |          |          |          |  |  |     |          |          |          |          |  |      |          |          |          |          |          |      |          |          |          |          |          |
| 10 B                                                                                                                           | 1.870970                                                                                                                                                                                                                                                                                                                                                                                                                                                                                                                                                                                                                                                                                                                                                                                                                                                                                                                                                                                                                                                                                                                                                                                                                                                                                                                                                                                                                                                                                                                                                                                                                                                                                                                                                                                                                                                                                                                                                  | 2.103971 | 1.761177 | 3.766292 | 1.835894 |   |   |      |          |  |  |  |  |      |          |          |  |  |  |      |          |          |          |  |  |      |          |          |          |          |  |     |          |          |          |          |          |     |          |          |          |          |          |     |          |          |          |          |          |      |          |          |          |          |          |     |          |          |          |          |          |      |          |          |          |          |          |      |          |          |          |          |          |  |   |   |   |   |    |     |          |  |  |  |  |     |          |          |  |  |  |      |          |          |          |  |  |     |          |          |          |          |  |      |          |          |          |          |          |      |          |          |          |          |          |
| 11 B                                                                                                                           | 2.913134                                                                                                                                                                                                                                                                                                                                                                                                                                                                                                                                                                                                                                                                                                                                                                                                                                                                                                                                                                                                                                                                                                                                                                                                                                                                                                                                                                                                                                                                                                                                                                                                                                                                                                                                                                                                                                                                                                                                                  | 3.177265 | 1.780701 | 3.177275 | 1.746476 |   |   |      |          |  |  |  |  |      |          |          |  |  |  |      |          |          |          |  |  |      |          |          |          |          |  |     |          |          |          |          |          |     |          |          |          |          |          |     |          |          |          |          |          |      |          |          |          |          |          |     |          |          |          |          |          |      |          |          |          |          |          |      |          |          |          |          |          |  |   |   |   |   |    |     |          |  |  |  |  |     |          |          |  |  |  |      |          |          |          |  |  |     |          |          |          |          |  |      |          |          |          |          |          |      |          |          |          |          |          |
|                                                                                                                                | 6                                                                                                                                                                                                                                                                                                                                                                                                                                                                                                                                                                                                                                                                                                                                                                                                                                                                                                                                                                                                                                                                                                                                                                                                                                                                                                                                                                                                                                                                                                                                                                                                                                                                                                                                                                                                                                                                                                                                                         | 7        | 8        | 9        | 10       |   |   |      |          |  |  |  |  |      |          |          |  |  |  |      |          |          |          |  |  |      |          |          |          |          |  |     |          |          |          |          |          |     |          |          |          |          |          |     |          |          |          |          |          |      |          |          |          |          |          |     |          |          |          |          |          |      |          |          |          |          |          |      |          |          |          |          |          |  |   |   |   |   |    |     |          |  |  |  |  |     |          |          |  |  |  |      |          |          |          |  |  |     |          |          |          |          |  |      |          |          |          |          |          |      |          |          |          |          |          |
| 6 B                                                                                                                            | 0.000000                                                                                                                                                                                                                                                                                                                                                                                                                                                                                                                                                                                                                                                                                                                                                                                                                                                                                                                                                                                                                                                                                                                                                                                                                                                                                                                                                                                                                                                                                                                                                                                                                                                                                                                                                                                                                                                                                                                                                  |          |          |          |          |   |   |      |          |  |  |  |  |      |          |          |  |  |  |      |          |          |          |  |  |      |          |          |          |          |  |     |          |          |          |          |          |     |          |          |          |          |          |     |          |          |          |          |          |      |          |          |          |          |          |     |          |          |          |          |          |      |          |          |          |          |          |      |          |          |          |          |          |  |   |   |   |   |    |     |          |  |  |  |  |     |          |          |  |  |  |      |          |          |          |  |  |     |          |          |          |          |  |      |          |          |          |          |          |      |          |          |          |          |          |
| 7 B                                                                                                                            | 1.835872                                                                                                                                                                                                                                                                                                                                                                                                                                                                                                                                                                                                                                                                                                                                                                                                                                                                                                                                                                                                                                                                                                                                                                                                                                                                                                                                                                                                                                                                                                                                                                                                                                                                                                                                                                                                                                                                                                                                                  | 0.000000 |          |          |          |   |   |      |          |  |  |  |  |      |          |          |  |  |  |      |          |          |          |  |  |      |          |          |          |          |  |     |          |          |          |          |          |     |          |          |          |          |          |     |          |          |          |          |          |      |          |          |          |          |          |     |          |          |          |          |          |      |          |          |          |          |          |      |          |          |          |          |          |  |   |   |   |   |    |     |          |  |  |  |  |     |          |          |  |  |  |      |          |          |          |  |  |     |          |          |          |          |  |      |          |          |          |          |          |      |          |          |          |          |          |
| 8 Co                                                                                                                           | 3.454720                                                                                                                                                                                                                                                                                                                                                                                                                                                                                                                                                                                                                                                                                                                                                                                                                                                                                                                                                                                                                                                                                                                                                                                                                                                                                                                                                                                                                                                                                                                                                                                                                                                                                                                                                                                                                                                                                                                                                  | 3.553243 | 0.000000 |          |          |   |   |      |          |  |  |  |  |      |          |          |  |  |  |      |          |          |          |  |  |      |          |          |          |          |  |     |          |          |          |          |          |     |          |          |          |          |          |     |          |          |          |          |          |      |          |          |          |          |          |     |          |          |          |          |          |      |          |          |          |          |          |      |          |          |          |          |          |  |   |   |   |   |    |     |          |  |  |  |  |     |          |          |  |  |  |      |          |          |          |  |  |     |          |          |          |          |  |      |          |          |          |          |          |      |          |          |          |          |          |
| 9 B                                                                                                                            | 1.871018                                                                                                                                                                                                                                                                                                                                                                                                                                                                                                                                                                                                                                                                                                                                                                                                                                                                                                                                                                                                                                                                                                                                                                                                                                                                                                                                                                                                                                                                                                                                                                                                                                                                                                                                                                                                                                                                                                                                                  | 3.024699 | 2.108670 | 0.000000 |          |   |   |      |          |  |  |  |  |      |          |          |  |  |  |      |          |          |          |  |  |      |          |          |          |          |  |     |          |          |          |          |          |     |          |          |          |          |          |     |          |          |          |          |          |      |          |          |          |          |          |     |          |          |          |          |          |      |          |          |          |          |          |      |          |          |          |          |          |  |   |   |   |   |    |     |          |  |  |  |  |     |          |          |  |  |  |      |          |          |          |  |  |     |          |          |          |          |  |      |          |          |          |          |          |      |          |          |          |          |          |
| 10 B                                                                                                                           | 2.872089                                                                                                                                                                                                                                                                                                                                                                                                                                                                                                                                                                                                                                                                                                                                                                                                                                                                                                                                                                                                                                                                                                                                                                                                                                                                                                                                                                                                                                                                                                                                                                                                                                                                                                                                                                                                                                                                                                                                                  | 2.889049 | 3.454681 | 2.939093 | 0.000000 |   |   |      |          |  |  |  |  |      |          |          |  |  |  |      |          |          |          |  |  |      |          |          |          |          |  |     |          |          |          |          |          |     |          |          |          |          |          |     |          |          |          |          |          |      |          |          |          |          |          |     |          |          |          |          |          |      |          |          |          |          |          |      |          |          |          |          |          |  |   |   |   |   |    |     |          |  |  |  |  |     |          |          |  |  |  |      |          |          |          |  |  |     |          |          |          |          |  |      |          |          |          |          |          |      |          |          |          |          |          |
| 11 B                                                                                                                           | 1.739730                                                                                                                                                                                                                                                                                                                                                                                                                                                                                                                                                                                                                                                                                                                                                                                                                                                                                                                                                                                                                                                                                                                                                                                                                                                                                                                                                                                                                                                                                                                                                                                                                                                                                                                                                                                                                                                                                                                                                  | 1.746483 | 3.983485 | 2.913137 | 1.739752 |   |   |      |          |  |  |  |  |      |          |          |  |  |  |      |          |          |          |  |  |      |          |          |          |          |  |     |          |          |          |          |          |     |          |          |          |          |          |     |          |          |          |          |          |      |          |          |          |          |          |     |          |          |          |          |          |      |          |          |          |          |          |      |          |          |          |          |          |  |   |   |   |   |    |     |          |  |  |  |  |     |          |          |  |  |  |      |          |          |          |  |  |     |          |          |          |          |  |      |          |          |          |          |          |      |          |          |          |          |          |
|  <p>2. -6582.8229947 +3.9 C<sub>1</sub></p> | <table border="1"> <thead> <tr> <th></th> <th>1</th> <th>2</th> <th>3</th> <th>4</th> <th>5</th> </tr> </thead> <tbody> <tr><td>1 Se</td><td>0.000000</td><td></td><td></td><td></td><td></td></tr> <tr><td>2 B</td><td>2.116399</td><td>0.000000</td><td></td><td></td><td></td></tr> <tr><td>3 Se</td><td>3.352506</td><td>3.215123</td><td>0.000000</td><td></td><td></td></tr> <tr><td>4 B</td><td>3.272478</td><td>2.939806</td><td>3.188684</td><td>0.000000</td><td></td></tr> <tr><td>5 B</td><td>2.135924</td><td>1.884535</td><td>3.739053</td><td>1.775480</td><td>0.000000</td></tr> <tr><td>6 B</td><td>3.795113</td><td>2.914281</td><td>2.126753</td><td>1.746557</td><td>2.879658</td></tr> <tr><td>7 B</td><td>3.216983</td><td>1.738501</td><td>3.206869</td><td>1.785034</td><td>1.766174</td></tr> <tr><td>8 Co</td><td>2.326548</td><td>3.408852</td><td>3.510366</td><td>2.050082</td><td>2.078250</td></tr> <tr><td>9 B</td><td>3.272903</td><td>3.527111</td><td>2.076560</td><td>1.728820</td><td>2.897427</td></tr> <tr><td>10 B</td><td>2.035773</td><td>1.806536</td><td>2.044602</td><td>3.543712</td><td>3.032497</td></tr> <tr><td>11 B</td><td>3.222110</td><td>1.741810</td><td>2.136100</td><td>2.919139</td><td>2.923220</td></tr> <tr> <td></td> <td>6</td> <td>7</td> <td>8</td> <td>9</td> <td>10</td> </tr> <tr><td>6 B</td><td>0.000000</td><td></td><td></td><td></td><td></td></tr> <tr><td>7 B</td><td>1.759554</td><td>0.000000</td><td></td><td></td><td></td></tr> <tr><td>8 Co</td><td>3.285525</td><td>3.271872</td><td>0.000000</td><td></td><td></td></tr> <tr><td>9 B</td><td>1.836357</td><td>2.896265</td><td>2.023230</td><td>0.000000</td><td></td></tr> <tr><td>10 B</td><td>3.034758</td><td>2.900824</td><td>3.514969</td><td>3.189617</td><td>0.000000</td></tr> <tr><td>11 B</td><td>1.859113</td><td>1.743423</td><td>3.925322</td><td>3.048179</td><td>1.809227</td></tr> </tbody> </table> |          | 1        | 2        | 3        | 4 | 5 | 1 Se | 0.000000 |  |  |  |  | 2 B  | 2.116399 | 0.000000 |  |  |  | 3 Se | 3.352506 | 3.215123 | 0.000000 |  |  | 4 B  | 3.272478 | 2.939806 | 3.188684 | 0.000000 |  | 5 B | 2.135924 | 1.884535 | 3.739053 | 1.775480 | 0.000000 | 6 B | 3.795113 | 2.914281 | 2.126753 | 1.746557 | 2.879658 | 7 B | 3.216983 | 1.738501 | 3.206869 | 1.785034 | 1.766174 | 8 Co | 2.326548 | 3.408852 | 3.510366 | 2.050082 | 2.078250 | 9 B | 3.272903 | 3.527111 | 2.076560 | 1.728820 | 2.897427 | 10 B | 2.035773 | 1.806536 | 2.044602 | 3.543712 | 3.032497 | 11 B | 3.222110 | 1.741810 | 2.136100 | 2.919139 | 2.923220 |  | 6 | 7 | 8 | 9 | 10 | 6 B | 0.000000 |  |  |  |  | 7 B | 1.759554 | 0.000000 |  |  |  | 8 Co | 3.285525 | 3.271872 | 0.000000 |  |  | 9 B | 1.836357 | 2.896265 | 2.023230 | 0.000000 |  | 10 B | 3.034758 | 2.900824 | 3.514969 | 3.189617 | 0.000000 | 11 B | 1.859113 | 1.743423 | 3.925322 | 3.048179 | 1.809227 |
|                                                                                                                                | 1                                                                                                                                                                                                                                                                                                                                                                                                                                                                                                                                                                                                                                                                                                                                                                                                                                                                                                                                                                                                                                                                                                                                                                                                                                                                                                                                                                                                                                                                                                                                                                                                                                                                                                                                                                                                                                                                                                                                                         | 2        | 3        | 4        | 5        |   |   |      |          |  |  |  |  |      |          |          |  |  |  |      |          |          |          |  |  |      |          |          |          |          |  |     |          |          |          |          |          |     |          |          |          |          |          |     |          |          |          |          |          |      |          |          |          |          |          |     |          |          |          |          |          |      |          |          |          |          |          |      |          |          |          |          |          |  |   |   |   |   |    |     |          |  |  |  |  |     |          |          |  |  |  |      |          |          |          |  |  |     |          |          |          |          |  |      |          |          |          |          |          |      |          |          |          |          |          |
| 1 Se                                                                                                                           | 0.000000                                                                                                                                                                                                                                                                                                                                                                                                                                                                                                                                                                                                                                                                                                                                                                                                                                                                                                                                                                                                                                                                                                                                                                                                                                                                                                                                                                                                                                                                                                                                                                                                                                                                                                                                                                                                                                                                                                                                                  |          |          |          |          |   |   |      |          |  |  |  |  |      |          |          |  |  |  |      |          |          |          |  |  |      |          |          |          |          |  |     |          |          |          |          |          |     |          |          |          |          |          |     |          |          |          |          |          |      |          |          |          |          |          |     |          |          |          |          |          |      |          |          |          |          |          |      |          |          |          |          |          |  |   |   |   |   |    |     |          |  |  |  |  |     |          |          |  |  |  |      |          |          |          |  |  |     |          |          |          |          |  |      |          |          |          |          |          |      |          |          |          |          |          |
| 2 B                                                                                                                            | 2.116399                                                                                                                                                                                                                                                                                                                                                                                                                                                                                                                                                                                                                                                                                                                                                                                                                                                                                                                                                                                                                                                                                                                                                                                                                                                                                                                                                                                                                                                                                                                                                                                                                                                                                                                                                                                                                                                                                                                                                  | 0.000000 |          |          |          |   |   |      |          |  |  |  |  |      |          |          |  |  |  |      |          |          |          |  |  |      |          |          |          |          |  |     |          |          |          |          |          |     |          |          |          |          |          |     |          |          |          |          |          |      |          |          |          |          |          |     |          |          |          |          |          |      |          |          |          |          |          |      |          |          |          |          |          |  |   |   |   |   |    |     |          |  |  |  |  |     |          |          |  |  |  |      |          |          |          |  |  |     |          |          |          |          |  |      |          |          |          |          |          |      |          |          |          |          |          |
| 3 Se                                                                                                                           | 3.352506                                                                                                                                                                                                                                                                                                                                                                                                                                                                                                                                                                                                                                                                                                                                                                                                                                                                                                                                                                                                                                                                                                                                                                                                                                                                                                                                                                                                                                                                                                                                                                                                                                                                                                                                                                                                                                                                                                                                                  | 3.215123 | 0.000000 |          |          |   |   |      |          |  |  |  |  |      |          |          |  |  |  |      |          |          |          |  |  |      |          |          |          |          |  |     |          |          |          |          |          |     |          |          |          |          |          |     |          |          |          |          |          |      |          |          |          |          |          |     |          |          |          |          |          |      |          |          |          |          |          |      |          |          |          |          |          |  |   |   |   |   |    |     |          |  |  |  |  |     |          |          |  |  |  |      |          |          |          |  |  |     |          |          |          |          |  |      |          |          |          |          |          |      |          |          |          |          |          |
| 4 B                                                                                                                            | 3.272478                                                                                                                                                                                                                                                                                                                                                                                                                                                                                                                                                                                                                                                                                                                                                                                                                                                                                                                                                                                                                                                                                                                                                                                                                                                                                                                                                                                                                                                                                                                                                                                                                                                                                                                                                                                                                                                                                                                                                  | 2.939806 | 3.188684 | 0.000000 |          |   |   |      |          |  |  |  |  |      |          |          |  |  |  |      |          |          |          |  |  |      |          |          |          |          |  |     |          |          |          |          |          |     |          |          |          |          |          |     |          |          |          |          |          |      |          |          |          |          |          |     |          |          |          |          |          |      |          |          |          |          |          |      |          |          |          |          |          |  |   |   |   |   |    |     |          |  |  |  |  |     |          |          |  |  |  |      |          |          |          |  |  |     |          |          |          |          |  |      |          |          |          |          |          |      |          |          |          |          |          |
| 5 B                                                                                                                            | 2.135924                                                                                                                                                                                                                                                                                                                                                                                                                                                                                                                                                                                                                                                                                                                                                                                                                                                                                                                                                                                                                                                                                                                                                                                                                                                                                                                                                                                                                                                                                                                                                                                                                                                                                                                                                                                                                                                                                                                                                  | 1.884535 | 3.739053 | 1.775480 | 0.000000 |   |   |      |          |  |  |  |  |      |          |          |  |  |  |      |          |          |          |  |  |      |          |          |          |          |  |     |          |          |          |          |          |     |          |          |          |          |          |     |          |          |          |          |          |      |          |          |          |          |          |     |          |          |          |          |          |      |          |          |          |          |          |      |          |          |          |          |          |  |   |   |   |   |    |     |          |  |  |  |  |     |          |          |  |  |  |      |          |          |          |  |  |     |          |          |          |          |  |      |          |          |          |          |          |      |          |          |          |          |          |
| 6 B                                                                                                                            | 3.795113                                                                                                                                                                                                                                                                                                                                                                                                                                                                                                                                                                                                                                                                                                                                                                                                                                                                                                                                                                                                                                                                                                                                                                                                                                                                                                                                                                                                                                                                                                                                                                                                                                                                                                                                                                                                                                                                                                                                                  | 2.914281 | 2.126753 | 1.746557 | 2.879658 |   |   |      |          |  |  |  |  |      |          |          |  |  |  |      |          |          |          |  |  |      |          |          |          |          |  |     |          |          |          |          |          |     |          |          |          |          |          |     |          |          |          |          |          |      |          |          |          |          |          |     |          |          |          |          |          |      |          |          |          |          |          |      |          |          |          |          |          |  |   |   |   |   |    |     |          |  |  |  |  |     |          |          |  |  |  |      |          |          |          |  |  |     |          |          |          |          |  |      |          |          |          |          |          |      |          |          |          |          |          |
| 7 B                                                                                                                            | 3.216983                                                                                                                                                                                                                                                                                                                                                                                                                                                                                                                                                                                                                                                                                                                                                                                                                                                                                                                                                                                                                                                                                                                                                                                                                                                                                                                                                                                                                                                                                                                                                                                                                                                                                                                                                                                                                                                                                                                                                  | 1.738501 | 3.206869 | 1.785034 | 1.766174 |   |   |      |          |  |  |  |  |      |          |          |  |  |  |      |          |          |          |  |  |      |          |          |          |          |  |     |          |          |          |          |          |     |          |          |          |          |          |     |          |          |          |          |          |      |          |          |          |          |          |     |          |          |          |          |          |      |          |          |          |          |          |      |          |          |          |          |          |  |   |   |   |   |    |     |          |  |  |  |  |     |          |          |  |  |  |      |          |          |          |  |  |     |          |          |          |          |  |      |          |          |          |          |          |      |          |          |          |          |          |
| 8 Co                                                                                                                           | 2.326548                                                                                                                                                                                                                                                                                                                                                                                                                                                                                                                                                                                                                                                                                                                                                                                                                                                                                                                                                                                                                                                                                                                                                                                                                                                                                                                                                                                                                                                                                                                                                                                                                                                                                                                                                                                                                                                                                                                                                  | 3.408852 | 3.510366 | 2.050082 | 2.078250 |   |   |      |          |  |  |  |  |      |          |          |  |  |  |      |          |          |          |  |  |      |          |          |          |          |  |     |          |          |          |          |          |     |          |          |          |          |          |     |          |          |          |          |          |      |          |          |          |          |          |     |          |          |          |          |          |      |          |          |          |          |          |      |          |          |          |          |          |  |   |   |   |   |    |     |          |  |  |  |  |     |          |          |  |  |  |      |          |          |          |  |  |     |          |          |          |          |  |      |          |          |          |          |          |      |          |          |          |          |          |
| 9 B                                                                                                                            | 3.272903                                                                                                                                                                                                                                                                                                                                                                                                                                                                                                                                                                                                                                                                                                                                                                                                                                                                                                                                                                                                                                                                                                                                                                                                                                                                                                                                                                                                                                                                                                                                                                                                                                                                                                                                                                                                                                                                                                                                                  | 3.527111 | 2.076560 | 1.728820 | 2.897427 |   |   |      |          |  |  |  |  |      |          |          |  |  |  |      |          |          |          |  |  |      |          |          |          |          |  |     |          |          |          |          |          |     |          |          |          |          |          |     |          |          |          |          |          |      |          |          |          |          |          |     |          |          |          |          |          |      |          |          |          |          |          |      |          |          |          |          |          |  |   |   |   |   |    |     |          |  |  |  |  |     |          |          |  |  |  |      |          |          |          |  |  |     |          |          |          |          |  |      |          |          |          |          |          |      |          |          |          |          |          |
| 10 B                                                                                                                           | 2.035773                                                                                                                                                                                                                                                                                                                                                                                                                                                                                                                                                                                                                                                                                                                                                                                                                                                                                                                                                                                                                                                                                                                                                                                                                                                                                                                                                                                                                                                                                                                                                                                                                                                                                                                                                                                                                                                                                                                                                  | 1.806536 | 2.044602 | 3.543712 | 3.032497 |   |   |      |          |  |  |  |  |      |          |          |  |  |  |      |          |          |          |  |  |      |          |          |          |          |  |     |          |          |          |          |          |     |          |          |          |          |          |     |          |          |          |          |          |      |          |          |          |          |          |     |          |          |          |          |          |      |          |          |          |          |          |      |          |          |          |          |          |  |   |   |   |   |    |     |          |  |  |  |  |     |          |          |  |  |  |      |          |          |          |  |  |     |          |          |          |          |  |      |          |          |          |          |          |      |          |          |          |          |          |
| 11 B                                                                                                                           | 3.222110                                                                                                                                                                                                                                                                                                                                                                                                                                                                                                                                                                                                                                                                                                                                                                                                                                                                                                                                                                                                                                                                                                                                                                                                                                                                                                                                                                                                                                                                                                                                                                                                                                                                                                                                                                                                                                                                                                                                                  | 1.741810 | 2.136100 | 2.919139 | 2.923220 |   |   |      |          |  |  |  |  |      |          |          |  |  |  |      |          |          |          |  |  |      |          |          |          |          |  |     |          |          |          |          |          |     |          |          |          |          |          |     |          |          |          |          |          |      |          |          |          |          |          |     |          |          |          |          |          |      |          |          |          |          |          |      |          |          |          |          |          |  |   |   |   |   |    |     |          |  |  |  |  |     |          |          |  |  |  |      |          |          |          |  |  |     |          |          |          |          |  |      |          |          |          |          |          |      |          |          |          |          |          |
|                                                                                                                                | 6                                                                                                                                                                                                                                                                                                                                                                                                                                                                                                                                                                                                                                                                                                                                                                                                                                                                                                                                                                                                                                                                                                                                                                                                                                                                                                                                                                                                                                                                                                                                                                                                                                                                                                                                                                                                                                                                                                                                                         | 7        | 8        | 9        | 10       |   |   |      |          |  |  |  |  |      |          |          |  |  |  |      |          |          |          |  |  |      |          |          |          |          |  |     |          |          |          |          |          |     |          |          |          |          |          |     |          |          |          |          |          |      |          |          |          |          |          |     |          |          |          |          |          |      |          |          |          |          |          |      |          |          |          |          |          |  |   |   |   |   |    |     |          |  |  |  |  |     |          |          |  |  |  |      |          |          |          |  |  |     |          |          |          |          |  |      |          |          |          |          |          |      |          |          |          |          |          |
| 6 B                                                                                                                            | 0.000000                                                                                                                                                                                                                                                                                                                                                                                                                                                                                                                                                                                                                                                                                                                                                                                                                                                                                                                                                                                                                                                                                                                                                                                                                                                                                                                                                                                                                                                                                                                                                                                                                                                                                                                                                                                                                                                                                                                                                  |          |          |          |          |   |   |      |          |  |  |  |  |      |          |          |  |  |  |      |          |          |          |  |  |      |          |          |          |          |  |     |          |          |          |          |          |     |          |          |          |          |          |     |          |          |          |          |          |      |          |          |          |          |          |     |          |          |          |          |          |      |          |          |          |          |          |      |          |          |          |          |          |  |   |   |   |   |    |     |          |  |  |  |  |     |          |          |  |  |  |      |          |          |          |  |  |     |          |          |          |          |  |      |          |          |          |          |          |      |          |          |          |          |          |
| 7 B                                                                                                                            | 1.759554                                                                                                                                                                                                                                                                                                                                                                                                                                                                                                                                                                                                                                                                                                                                                                                                                                                                                                                                                                                                                                                                                                                                                                                                                                                                                                                                                                                                                                                                                                                                                                                                                                                                                                                                                                                                                                                                                                                                                  | 0.000000 |          |          |          |   |   |      |          |  |  |  |  |      |          |          |  |  |  |      |          |          |          |  |  |      |          |          |          |          |  |     |          |          |          |          |          |     |          |          |          |          |          |     |          |          |          |          |          |      |          |          |          |          |          |     |          |          |          |          |          |      |          |          |          |          |          |      |          |          |          |          |          |  |   |   |   |   |    |     |          |  |  |  |  |     |          |          |  |  |  |      |          |          |          |  |  |     |          |          |          |          |  |      |          |          |          |          |          |      |          |          |          |          |          |
| 8 Co                                                                                                                           | 3.285525                                                                                                                                                                                                                                                                                                                                                                                                                                                                                                                                                                                                                                                                                                                                                                                                                                                                                                                                                                                                                                                                                                                                                                                                                                                                                                                                                                                                                                                                                                                                                                                                                                                                                                                                                                                                                                                                                                                                                  | 3.271872 | 0.000000 |          |          |   |   |      |          |  |  |  |  |      |          |          |  |  |  |      |          |          |          |  |  |      |          |          |          |          |  |     |          |          |          |          |          |     |          |          |          |          |          |     |          |          |          |          |          |      |          |          |          |          |          |     |          |          |          |          |          |      |          |          |          |          |          |      |          |          |          |          |          |  |   |   |   |   |    |     |          |  |  |  |  |     |          |          |  |  |  |      |          |          |          |  |  |     |          |          |          |          |  |      |          |          |          |          |          |      |          |          |          |          |          |
| 9 B                                                                                                                            | 1.836357                                                                                                                                                                                                                                                                                                                                                                                                                                                                                                                                                                                                                                                                                                                                                                                                                                                                                                                                                                                                                                                                                                                                                                                                                                                                                                                                                                                                                                                                                                                                                                                                                                                                                                                                                                                                                                                                                                                                                  | 2.896265 | 2.023230 | 0.000000 |          |   |   |      |          |  |  |  |  |      |          |          |  |  |  |      |          |          |          |  |  |      |          |          |          |          |  |     |          |          |          |          |          |     |          |          |          |          |          |     |          |          |          |          |          |      |          |          |          |          |          |     |          |          |          |          |          |      |          |          |          |          |          |      |          |          |          |          |          |  |   |   |   |   |    |     |          |  |  |  |  |     |          |          |  |  |  |      |          |          |          |  |  |     |          |          |          |          |  |      |          |          |          |          |          |      |          |          |          |          |          |
| 10 B                                                                                                                           | 3.034758                                                                                                                                                                                                                                                                                                                                                                                                                                                                                                                                                                                                                                                                                                                                                                                                                                                                                                                                                                                                                                                                                                                                                                                                                                                                                                                                                                                                                                                                                                                                                                                                                                                                                                                                                                                                                                                                                                                                                  | 2.900824 | 3.514969 | 3.189617 | 0.000000 |   |   |      |          |  |  |  |  |      |          |          |  |  |  |      |          |          |          |  |  |      |          |          |          |          |  |     |          |          |          |          |          |     |          |          |          |          |          |     |          |          |          |          |          |      |          |          |          |          |          |     |          |          |          |          |          |      |          |          |          |          |          |      |          |          |          |          |          |  |   |   |   |   |    |     |          |  |  |  |  |     |          |          |  |  |  |      |          |          |          |  |  |     |          |          |          |          |  |      |          |          |          |          |          |      |          |          |          |          |          |
| 11 B                                                                                                                           | 1.859113                                                                                                                                                                                                                                                                                                                                                                                                                                                                                                                                                                                                                                                                                                                                                                                                                                                                                                                                                                                                                                                                                                                                                                                                                                                                                                                                                                                                                                                                                                                                                                                                                                                                                                                                                                                                                                                                                                                                                  | 1.743423 | 3.925322 | 3.048179 | 1.809227 |   |   |      |          |  |  |  |  |      |          |          |  |  |  |      |          |          |          |  |  |      |          |          |          |          |  |     |          |          |          |          |          |     |          |          |          |          |          |     |          |          |          |          |          |      |          |          |          |          |          |     |          |          |          |          |          |      |          |          |          |          |          |      |          |          |          |          |          |  |   |   |   |   |    |     |          |  |  |  |  |     |          |          |  |  |  |      |          |          |          |  |  |     |          |          |          |          |  |      |          |          |          |          |          |      |          |          |          |          |          |



| 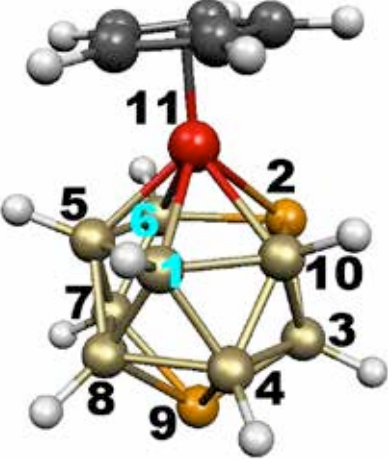 <p>3. -6582.8189216 +6.5 C<sub>1</sub></p>  | <table border="1"> <thead> <tr> <th></th> <th>1</th> <th>2</th> <th>3</th> <th>4</th> <th>5</th> </tr> </thead> <tbody> <tr><td>1 B</td><td>0.000000</td><td></td><td></td><td></td><td></td></tr> <tr><td>2 Se</td><td>3.289986</td><td>0.000000</td><td></td><td></td><td></td></tr> <tr><td>3 B</td><td>2.913816</td><td>2.040283</td><td>0.000000</td><td></td><td></td></tr> <tr><td>4 B</td><td>1.742619</td><td>3.237403</td><td>1.794233</td><td>0.000000</td><td></td></tr> <tr><td>5 B</td><td>1.777725</td><td>3.216381</td><td>3.507327</td><td>2.903219</td><td>0.000000</td></tr> <tr><td>6 B</td><td>2.954492</td><td>2.048441</td><td>3.140060</td><td>3.511720</td><td>1.785043</td></tr> <tr><td>7 B</td><td>2.897313</td><td>3.156207</td><td>3.142654</td><td>3.028855</td><td>1.737605</td></tr> <tr><td>8 B</td><td>1.764960</td><td>3.770446</td><td>3.033651</td><td>1.890231</td><td>1.737133</td></tr> <tr><td>9 Se</td><td>3.220529</td><td>3.279604</td><td>2.037096</td><td>2.153995</td><td>3.176397</td></tr> <tr><td>10 B</td><td>1.755735</td><td>2.214671</td><td>1.811513</td><td>1.725650</td><td>2.906316</td></tr> <tr><td>11 Co</td><td>2.103757</td><td>2.351618</td><td>3.366140</td><td>3.293802</td><td>2.069009</td></tr> <tr> <th></th> <th>6</th> <th>7</th> <th>8</th> <th>9</th> <th>10</th> </tr> <tr><td>6 B</td><td>0.000000</td><td></td><td></td><td></td><td></td></tr> <tr><td>7 B</td><td>1.742001</td><td>0.000000</td><td></td><td></td><td></td></tr> <tr><td>8 B</td><td>2.908430</td><td>1.811704</td><td>0.000000</td><td></td><td></td></tr> <tr><td>9 Se</td><td>3.132524</td><td>2.038024</td><td>2.131527</td><td>0.000000</td><td></td></tr> <tr><td>10 B</td><td>3.067932</td><td>3.501480</td><td>2.924533</td><td>3.221501</td><td>0.000000</td></tr> <tr><td>11 Co</td><td>2.122462</td><td>3.281186</td><td>3.294095</td><td>4.173055</td><td>2.114173</td></tr> </tbody> </table> |          | 1        | 2        | 3        | 4 | 5 | 1 B  | 0.000000 |  |  |  |  | 2 Se | 3.289986 | 0.000000 |  |  |  | 3 B | 2.913816 | 2.040283 | 0.000000 |  |  | 4 B | 1.742619 | 3.237403 | 1.794233 | 0.000000 |  | 5 B  | 1.777725 | 3.216381 | 3.507327 | 2.903219 | 0.000000 | 6 B | 2.954492 | 2.048441 | 3.140060 | 3.511720 | 1.785043 | 7 B | 2.897313 | 3.156207 | 3.142654 | 3.028855 | 1.737605 | 8 B  | 1.764960 | 3.770446 | 3.033651 | 1.890231 | 1.737133 | 9 Se | 3.220529 | 3.279604 | 2.037096 | 2.153995 | 3.176397 | 10 B | 1.755735 | 2.214671 | 1.811513 | 1.725650 | 2.906316 | 11 Co | 2.103757 | 2.351618 | 3.366140 | 3.293802 | 2.069009 |  | 6 | 7 | 8 | 9 | 10 | 6 B | 0.000000 |  |  |  |  | 7 B | 1.742001 | 0.000000 |  |  |  | 8 B  | 2.908430 | 1.811704 | 0.000000 |  |  | 9 Se | 3.132524 | 2.038024 | 2.131527 | 0.000000 |  | 10 B | 3.067932 | 3.501480 | 2.924533 | 3.221501 | 0.000000 | 11 Co | 2.122462 | 3.281186 | 3.294095 | 4.173055 | 2.114173 |
|-------------------------------------------------------------------------------------------------------------------------------|------------------------------------------------------------------------------------------------------------------------------------------------------------------------------------------------------------------------------------------------------------------------------------------------------------------------------------------------------------------------------------------------------------------------------------------------------------------------------------------------------------------------------------------------------------------------------------------------------------------------------------------------------------------------------------------------------------------------------------------------------------------------------------------------------------------------------------------------------------------------------------------------------------------------------------------------------------------------------------------------------------------------------------------------------------------------------------------------------------------------------------------------------------------------------------------------------------------------------------------------------------------------------------------------------------------------------------------------------------------------------------------------------------------------------------------------------------------------------------------------------------------------------------------------------------------------------------------------------------------------------------------------------------------------------------------------------------------------------------------------------------------------------------------------------------------------------------------------------------------------------------------------------------------------------------------------------------|----------|----------|----------|----------|---|---|------|----------|--|--|--|--|------|----------|----------|--|--|--|-----|----------|----------|----------|--|--|-----|----------|----------|----------|----------|--|------|----------|----------|----------|----------|----------|-----|----------|----------|----------|----------|----------|-----|----------|----------|----------|----------|----------|------|----------|----------|----------|----------|----------|------|----------|----------|----------|----------|----------|------|----------|----------|----------|----------|----------|-------|----------|----------|----------|----------|----------|--|---|---|---|---|----|-----|----------|--|--|--|--|-----|----------|----------|--|--|--|------|----------|----------|----------|--|--|------|----------|----------|----------|----------|--|------|----------|----------|----------|----------|----------|-------|----------|----------|----------|----------|----------|
|                                                                                                                               | 1                                                                                                                                                                                                                                                                                                                                                                                                                                                                                                                                                                                                                                                                                                                                                                                                                                                                                                                                                                                                                                                                                                                                                                                                                                                                                                                                                                                                                                                                                                                                                                                                                                                                                                                                                                                                                                                                                                                                                          | 2        | 3        | 4        | 5        |   |   |      |          |  |  |  |  |      |          |          |  |  |  |     |          |          |          |  |  |     |          |          |          |          |  |      |          |          |          |          |          |     |          |          |          |          |          |     |          |          |          |          |          |      |          |          |          |          |          |      |          |          |          |          |          |      |          |          |          |          |          |       |          |          |          |          |          |  |   |   |   |   |    |     |          |  |  |  |  |     |          |          |  |  |  |      |          |          |          |  |  |      |          |          |          |          |  |      |          |          |          |          |          |       |          |          |          |          |          |
| 1 B                                                                                                                           | 0.000000                                                                                                                                                                                                                                                                                                                                                                                                                                                                                                                                                                                                                                                                                                                                                                                                                                                                                                                                                                                                                                                                                                                                                                                                                                                                                                                                                                                                                                                                                                                                                                                                                                                                                                                                                                                                                                                                                                                                                   |          |          |          |          |   |   |      |          |  |  |  |  |      |          |          |  |  |  |     |          |          |          |  |  |     |          |          |          |          |  |      |          |          |          |          |          |     |          |          |          |          |          |     |          |          |          |          |          |      |          |          |          |          |          |      |          |          |          |          |          |      |          |          |          |          |          |       |          |          |          |          |          |  |   |   |   |   |    |     |          |  |  |  |  |     |          |          |  |  |  |      |          |          |          |  |  |      |          |          |          |          |  |      |          |          |          |          |          |       |          |          |          |          |          |
| 2 Se                                                                                                                          | 3.289986                                                                                                                                                                                                                                                                                                                                                                                                                                                                                                                                                                                                                                                                                                                                                                                                                                                                                                                                                                                                                                                                                                                                                                                                                                                                                                                                                                                                                                                                                                                                                                                                                                                                                                                                                                                                                                                                                                                                                   | 0.000000 |          |          |          |   |   |      |          |  |  |  |  |      |          |          |  |  |  |     |          |          |          |  |  |     |          |          |          |          |  |      |          |          |          |          |          |     |          |          |          |          |          |     |          |          |          |          |          |      |          |          |          |          |          |      |          |          |          |          |          |      |          |          |          |          |          |       |          |          |          |          |          |  |   |   |   |   |    |     |          |  |  |  |  |     |          |          |  |  |  |      |          |          |          |  |  |      |          |          |          |          |  |      |          |          |          |          |          |       |          |          |          |          |          |
| 3 B                                                                                                                           | 2.913816                                                                                                                                                                                                                                                                                                                                                                                                                                                                                                                                                                                                                                                                                                                                                                                                                                                                                                                                                                                                                                                                                                                                                                                                                                                                                                                                                                                                                                                                                                                                                                                                                                                                                                                                                                                                                                                                                                                                                   | 2.040283 | 0.000000 |          |          |   |   |      |          |  |  |  |  |      |          |          |  |  |  |     |          |          |          |  |  |     |          |          |          |          |  |      |          |          |          |          |          |     |          |          |          |          |          |     |          |          |          |          |          |      |          |          |          |          |          |      |          |          |          |          |          |      |          |          |          |          |          |       |          |          |          |          |          |  |   |   |   |   |    |     |          |  |  |  |  |     |          |          |  |  |  |      |          |          |          |  |  |      |          |          |          |          |  |      |          |          |          |          |          |       |          |          |          |          |          |
| 4 B                                                                                                                           | 1.742619                                                                                                                                                                                                                                                                                                                                                                                                                                                                                                                                                                                                                                                                                                                                                                                                                                                                                                                                                                                                                                                                                                                                                                                                                                                                                                                                                                                                                                                                                                                                                                                                                                                                                                                                                                                                                                                                                                                                                   | 3.237403 | 1.794233 | 0.000000 |          |   |   |      |          |  |  |  |  |      |          |          |  |  |  |     |          |          |          |  |  |     |          |          |          |          |  |      |          |          |          |          |          |     |          |          |          |          |          |     |          |          |          |          |          |      |          |          |          |          |          |      |          |          |          |          |          |      |          |          |          |          |          |       |          |          |          |          |          |  |   |   |   |   |    |     |          |  |  |  |  |     |          |          |  |  |  |      |          |          |          |  |  |      |          |          |          |          |  |      |          |          |          |          |          |       |          |          |          |          |          |
| 5 B                                                                                                                           | 1.777725                                                                                                                                                                                                                                                                                                                                                                                                                                                                                                                                                                                                                                                                                                                                                                                                                                                                                                                                                                                                                                                                                                                                                                                                                                                                                                                                                                                                                                                                                                                                                                                                                                                                                                                                                                                                                                                                                                                                                   | 3.216381 | 3.507327 | 2.903219 | 0.000000 |   |   |      |          |  |  |  |  |      |          |          |  |  |  |     |          |          |          |  |  |     |          |          |          |          |  |      |          |          |          |          |          |     |          |          |          |          |          |     |          |          |          |          |          |      |          |          |          |          |          |      |          |          |          |          |          |      |          |          |          |          |          |       |          |          |          |          |          |  |   |   |   |   |    |     |          |  |  |  |  |     |          |          |  |  |  |      |          |          |          |  |  |      |          |          |          |          |  |      |          |          |          |          |          |       |          |          |          |          |          |
| 6 B                                                                                                                           | 2.954492                                                                                                                                                                                                                                                                                                                                                                                                                                                                                                                                                                                                                                                                                                                                                                                                                                                                                                                                                                                                                                                                                                                                                                                                                                                                                                                                                                                                                                                                                                                                                                                                                                                                                                                                                                                                                                                                                                                                                   | 2.048441 | 3.140060 | 3.511720 | 1.785043 |   |   |      |          |  |  |  |  |      |          |          |  |  |  |     |          |          |          |  |  |     |          |          |          |          |  |      |          |          |          |          |          |     |          |          |          |          |          |     |          |          |          |          |          |      |          |          |          |          |          |      |          |          |          |          |          |      |          |          |          |          |          |       |          |          |          |          |          |  |   |   |   |   |    |     |          |  |  |  |  |     |          |          |  |  |  |      |          |          |          |  |  |      |          |          |          |          |  |      |          |          |          |          |          |       |          |          |          |          |          |
| 7 B                                                                                                                           | 2.897313                                                                                                                                                                                                                                                                                                                                                                                                                                                                                                                                                                                                                                                                                                                                                                                                                                                                                                                                                                                                                                                                                                                                                                                                                                                                                                                                                                                                                                                                                                                                                                                                                                                                                                                                                                                                                                                                                                                                                   | 3.156207 | 3.142654 | 3.028855 | 1.737605 |   |   |      |          |  |  |  |  |      |          |          |  |  |  |     |          |          |          |  |  |     |          |          |          |          |  |      |          |          |          |          |          |     |          |          |          |          |          |     |          |          |          |          |          |      |          |          |          |          |          |      |          |          |          |          |          |      |          |          |          |          |          |       |          |          |          |          |          |  |   |   |   |   |    |     |          |  |  |  |  |     |          |          |  |  |  |      |          |          |          |  |  |      |          |          |          |          |  |      |          |          |          |          |          |       |          |          |          |          |          |
| 8 B                                                                                                                           | 1.764960                                                                                                                                                                                                                                                                                                                                                                                                                                                                                                                                                                                                                                                                                                                                                                                                                                                                                                                                                                                                                                                                                                                                                                                                                                                                                                                                                                                                                                                                                                                                                                                                                                                                                                                                                                                                                                                                                                                                                   | 3.770446 | 3.033651 | 1.890231 | 1.737133 |   |   |      |          |  |  |  |  |      |          |          |  |  |  |     |          |          |          |  |  |     |          |          |          |          |  |      |          |          |          |          |          |     |          |          |          |          |          |     |          |          |          |          |          |      |          |          |          |          |          |      |          |          |          |          |          |      |          |          |          |          |          |       |          |          |          |          |          |  |   |   |   |   |    |     |          |  |  |  |  |     |          |          |  |  |  |      |          |          |          |  |  |      |          |          |          |          |  |      |          |          |          |          |          |       |          |          |          |          |          |
| 9 Se                                                                                                                          | 3.220529                                                                                                                                                                                                                                                                                                                                                                                                                                                                                                                                                                                                                                                                                                                                                                                                                                                                                                                                                                                                                                                                                                                                                                                                                                                                                                                                                                                                                                                                                                                                                                                                                                                                                                                                                                                                                                                                                                                                                   | 3.279604 | 2.037096 | 2.153995 | 3.176397 |   |   |      |          |  |  |  |  |      |          |          |  |  |  |     |          |          |          |  |  |     |          |          |          |          |  |      |          |          |          |          |          |     |          |          |          |          |          |     |          |          |          |          |          |      |          |          |          |          |          |      |          |          |          |          |          |      |          |          |          |          |          |       |          |          |          |          |          |  |   |   |   |   |    |     |          |  |  |  |  |     |          |          |  |  |  |      |          |          |          |  |  |      |          |          |          |          |  |      |          |          |          |          |          |       |          |          |          |          |          |
| 10 B                                                                                                                          | 1.755735                                                                                                                                                                                                                                                                                                                                                                                                                                                                                                                                                                                                                                                                                                                                                                                                                                                                                                                                                                                                                                                                                                                                                                                                                                                                                                                                                                                                                                                                                                                                                                                                                                                                                                                                                                                                                                                                                                                                                   | 2.214671 | 1.811513 | 1.725650 | 2.906316 |   |   |      |          |  |  |  |  |      |          |          |  |  |  |     |          |          |          |  |  |     |          |          |          |          |  |      |          |          |          |          |          |     |          |          |          |          |          |     |          |          |          |          |          |      |          |          |          |          |          |      |          |          |          |          |          |      |          |          |          |          |          |       |          |          |          |          |          |  |   |   |   |   |    |     |          |  |  |  |  |     |          |          |  |  |  |      |          |          |          |  |  |      |          |          |          |          |  |      |          |          |          |          |          |       |          |          |          |          |          |
| 11 Co                                                                                                                         | 2.103757                                                                                                                                                                                                                                                                                                                                                                                                                                                                                                                                                                                                                                                                                                                                                                                                                                                                                                                                                                                                                                                                                                                                                                                                                                                                                                                                                                                                                                                                                                                                                                                                                                                                                                                                                                                                                                                                                                                                                   | 2.351618 | 3.366140 | 3.293802 | 2.069009 |   |   |      |          |  |  |  |  |      |          |          |  |  |  |     |          |          |          |  |  |     |          |          |          |          |  |      |          |          |          |          |          |     |          |          |          |          |          |     |          |          |          |          |          |      |          |          |          |          |          |      |          |          |          |          |          |      |          |          |          |          |          |       |          |          |          |          |          |  |   |   |   |   |    |     |          |  |  |  |  |     |          |          |  |  |  |      |          |          |          |  |  |      |          |          |          |          |  |      |          |          |          |          |          |       |          |          |          |          |          |
|                                                                                                                               | 6                                                                                                                                                                                                                                                                                                                                                                                                                                                                                                                                                                                                                                                                                                                                                                                                                                                                                                                                                                                                                                                                                                                                                                                                                                                                                                                                                                                                                                                                                                                                                                                                                                                                                                                                                                                                                                                                                                                                                          | 7        | 8        | 9        | 10       |   |   |      |          |  |  |  |  |      |          |          |  |  |  |     |          |          |          |  |  |     |          |          |          |          |  |      |          |          |          |          |          |     |          |          |          |          |          |     |          |          |          |          |          |      |          |          |          |          |          |      |          |          |          |          |          |      |          |          |          |          |          |       |          |          |          |          |          |  |   |   |   |   |    |     |          |  |  |  |  |     |          |          |  |  |  |      |          |          |          |  |  |      |          |          |          |          |  |      |          |          |          |          |          |       |          |          |          |          |          |
| 6 B                                                                                                                           | 0.000000                                                                                                                                                                                                                                                                                                                                                                                                                                                                                                                                                                                                                                                                                                                                                                                                                                                                                                                                                                                                                                                                                                                                                                                                                                                                                                                                                                                                                                                                                                                                                                                                                                                                                                                                                                                                                                                                                                                                                   |          |          |          |          |   |   |      |          |  |  |  |  |      |          |          |  |  |  |     |          |          |          |  |  |     |          |          |          |          |  |      |          |          |          |          |          |     |          |          |          |          |          |     |          |          |          |          |          |      |          |          |          |          |          |      |          |          |          |          |          |      |          |          |          |          |          |       |          |          |          |          |          |  |   |   |   |   |    |     |          |  |  |  |  |     |          |          |  |  |  |      |          |          |          |  |  |      |          |          |          |          |  |      |          |          |          |          |          |       |          |          |          |          |          |
| 7 B                                                                                                                           | 1.742001                                                                                                                                                                                                                                                                                                                                                                                                                                                                                                                                                                                                                                                                                                                                                                                                                                                                                                                                                                                                                                                                                                                                                                                                                                                                                                                                                                                                                                                                                                                                                                                                                                                                                                                                                                                                                                                                                                                                                   | 0.000000 |          |          |          |   |   |      |          |  |  |  |  |      |          |          |  |  |  |     |          |          |          |  |  |     |          |          |          |          |  |      |          |          |          |          |          |     |          |          |          |          |          |     |          |          |          |          |          |      |          |          |          |          |          |      |          |          |          |          |          |      |          |          |          |          |          |       |          |          |          |          |          |  |   |   |   |   |    |     |          |  |  |  |  |     |          |          |  |  |  |      |          |          |          |  |  |      |          |          |          |          |  |      |          |          |          |          |          |       |          |          |          |          |          |
| 8 B                                                                                                                           | 2.908430                                                                                                                                                                                                                                                                                                                                                                                                                                                                                                                                                                                                                                                                                                                                                                                                                                                                                                                                                                                                                                                                                                                                                                                                                                                                                                                                                                                                                                                                                                                                                                                                                                                                                                                                                                                                                                                                                                                                                   | 1.811704 | 0.000000 |          |          |   |   |      |          |  |  |  |  |      |          |          |  |  |  |     |          |          |          |  |  |     |          |          |          |          |  |      |          |          |          |          |          |     |          |          |          |          |          |     |          |          |          |          |          |      |          |          |          |          |          |      |          |          |          |          |          |      |          |          |          |          |          |       |          |          |          |          |          |  |   |   |   |   |    |     |          |  |  |  |  |     |          |          |  |  |  |      |          |          |          |  |  |      |          |          |          |          |  |      |          |          |          |          |          |       |          |          |          |          |          |
| 9 Se                                                                                                                          | 3.132524                                                                                                                                                                                                                                                                                                                                                                                                                                                                                                                                                                                                                                                                                                                                                                                                                                                                                                                                                                                                                                                                                                                                                                                                                                                                                                                                                                                                                                                                                                                                                                                                                                                                                                                                                                                                                                                                                                                                                   | 2.038024 | 2.131527 | 0.000000 |          |   |   |      |          |  |  |  |  |      |          |          |  |  |  |     |          |          |          |  |  |     |          |          |          |          |  |      |          |          |          |          |          |     |          |          |          |          |          |     |          |          |          |          |          |      |          |          |          |          |          |      |          |          |          |          |          |      |          |          |          |          |          |       |          |          |          |          |          |  |   |   |   |   |    |     |          |  |  |  |  |     |          |          |  |  |  |      |          |          |          |  |  |      |          |          |          |          |  |      |          |          |          |          |          |       |          |          |          |          |          |
| 10 B                                                                                                                          | 3.067932                                                                                                                                                                                                                                                                                                                                                                                                                                                                                                                                                                                                                                                                                                                                                                                                                                                                                                                                                                                                                                                                                                                                                                                                                                                                                                                                                                                                                                                                                                                                                                                                                                                                                                                                                                                                                                                                                                                                                   | 3.501480 | 2.924533 | 3.221501 | 0.000000 |   |   |      |          |  |  |  |  |      |          |          |  |  |  |     |          |          |          |  |  |     |          |          |          |          |  |      |          |          |          |          |          |     |          |          |          |          |          |     |          |          |          |          |          |      |          |          |          |          |          |      |          |          |          |          |          |      |          |          |          |          |          |       |          |          |          |          |          |  |   |   |   |   |    |     |          |  |  |  |  |     |          |          |  |  |  |      |          |          |          |  |  |      |          |          |          |          |  |      |          |          |          |          |          |       |          |          |          |          |          |
| 11 Co                                                                                                                         | 2.122462                                                                                                                                                                                                                                                                                                                                                                                                                                                                                                                                                                                                                                                                                                                                                                                                                                                                                                                                                                                                                                                                                                                                                                                                                                                                                                                                                                                                                                                                                                                                                                                                                                                                                                                                                                                                                                                                                                                                                   | 3.281186 | 3.294095 | 4.173055 | 2.114173 |   |   |      |          |  |  |  |  |      |          |          |  |  |  |     |          |          |          |  |  |     |          |          |          |          |  |      |          |          |          |          |          |     |          |          |          |          |          |     |          |          |          |          |          |      |          |          |          |          |          |      |          |          |          |          |          |      |          |          |          |          |          |       |          |          |          |          |          |  |   |   |   |   |    |     |          |  |  |  |  |     |          |          |  |  |  |      |          |          |          |  |  |      |          |          |          |          |  |      |          |          |          |          |          |       |          |          |          |          |          |
|  <p>4. -6582.8183513 +6.8 C<sub>1</sub></p> | <table border="1"> <thead> <tr> <th></th> <th>1</th> <th>2</th> <th>3</th> <th>4</th> <th>5</th> </tr> </thead> <tbody> <tr><td>1 Co</td><td>0.000000</td><td></td><td></td><td></td><td></td></tr> <tr><td>2 B</td><td>2.069031</td><td>0.000000</td><td></td><td></td><td></td></tr> <tr><td>3 B</td><td>2.072285</td><td>2.951037</td><td>0.000000</td><td></td><td></td></tr> <tr><td>4 B</td><td>3.419818</td><td>3.151526</td><td>2.918340</td><td>0.000000</td><td></td></tr> <tr><td>5 Se</td><td>3.611772</td><td>2.055489</td><td>3.220733</td><td>3.164021</td><td>0.000000</td></tr> <tr><td>6 B</td><td>3.304267</td><td>3.530302</td><td>1.775737</td><td>1.744237</td><td>3.184350</td></tr> <tr><td>7 B</td><td>3.945576</td><td>3.141391</td><td>2.922801</td><td>1.703119</td><td>2.060166</td></tr> <tr><td>8 Se</td><td>2.376595</td><td>2.021362</td><td>3.258532</td><td>2.053906</td><td>3.298517</td></tr> <tr><td>9 B</td><td>2.167981</td><td>3.070265</td><td>1.784495</td><td>1.831075</td><td>3.759693</td></tr> <tr><td>10 B</td><td>2.054640</td><td>1.866165</td><td>1.742731</td><td>3.513588</td><td>2.148837</td></tr> <tr><td>11 B</td><td>3.334090</td><td>3.046276</td><td>1.771245</td><td>2.889164</td><td>2.102823</td></tr> <tr> <th></th> <th>6</th> <th>7</th> <th>8</th> <th>9</th> <th>10</th> </tr> <tr><td>6 B</td><td>0.000000</td><td></td><td></td><td></td><td></td></tr> <tr><td>7 B</td><td>1.757736</td><td>0.000000</td><td></td><td></td><td></td></tr> <tr><td>8 Se</td><td>3.192897</td><td>3.111517</td><td>0.000000</td><td></td><td></td></tr> <tr><td>9 B</td><td>1.722188</td><td>2.874694</td><td>2.179532</td><td>0.000000</td><td></td></tr> <tr><td>10 B</td><td>2.903498</td><td>3.054238</td><td>3.246822</td><td>2.941049</td><td>0.000000</td></tr> <tr><td>11 B</td><td>1.752047</td><td>1.860319</td><td>3.742634</td><td>2.876546</td><td>1.857920</td></tr> </tbody> </table>  |          | 1        | 2        | 3        | 4 | 5 | 1 Co | 0.000000 |  |  |  |  | 2 B  | 2.069031 | 0.000000 |  |  |  | 3 B | 2.072285 | 2.951037 | 0.000000 |  |  | 4 B | 3.419818 | 3.151526 | 2.918340 | 0.000000 |  | 5 Se | 3.611772 | 2.055489 | 3.220733 | 3.164021 | 0.000000 | 6 B | 3.304267 | 3.530302 | 1.775737 | 1.744237 | 3.184350 | 7 B | 3.945576 | 3.141391 | 2.922801 | 1.703119 | 2.060166 | 8 Se | 2.376595 | 2.021362 | 3.258532 | 2.053906 | 3.298517 | 9 B  | 2.167981 | 3.070265 | 1.784495 | 1.831075 | 3.759693 | 10 B | 2.054640 | 1.866165 | 1.742731 | 3.513588 | 2.148837 | 11 B  | 3.334090 | 3.046276 | 1.771245 | 2.889164 | 2.102823 |  | 6 | 7 | 8 | 9 | 10 | 6 B | 0.000000 |  |  |  |  | 7 B | 1.757736 | 0.000000 |  |  |  | 8 Se | 3.192897 | 3.111517 | 0.000000 |  |  | 9 B  | 1.722188 | 2.874694 | 2.179532 | 0.000000 |  | 10 B | 2.903498 | 3.054238 | 3.246822 | 2.941049 | 0.000000 | 11 B  | 1.752047 | 1.860319 | 3.742634 | 2.876546 | 1.857920 |
|                                                                                                                               | 1                                                                                                                                                                                                                                                                                                                                                                                                                                                                                                                                                                                                                                                                                                                                                                                                                                                                                                                                                                                                                                                                                                                                                                                                                                                                                                                                                                                                                                                                                                                                                                                                                                                                                                                                                                                                                                                                                                                                                          | 2        | 3        | 4        | 5        |   |   |      |          |  |  |  |  |      |          |          |  |  |  |     |          |          |          |  |  |     |          |          |          |          |  |      |          |          |          |          |          |     |          |          |          |          |          |     |          |          |          |          |          |      |          |          |          |          |          |      |          |          |          |          |          |      |          |          |          |          |          |       |          |          |          |          |          |  |   |   |   |   |    |     |          |  |  |  |  |     |          |          |  |  |  |      |          |          |          |  |  |      |          |          |          |          |  |      |          |          |          |          |          |       |          |          |          |          |          |
| 1 Co                                                                                                                          | 0.000000                                                                                                                                                                                                                                                                                                                                                                                                                                                                                                                                                                                                                                                                                                                                                                                                                                                                                                                                                                                                                                                                                                                                                                                                                                                                                                                                                                                                                                                                                                                                                                                                                                                                                                                                                                                                                                                                                                                                                   |          |          |          |          |   |   |      |          |  |  |  |  |      |          |          |  |  |  |     |          |          |          |  |  |     |          |          |          |          |  |      |          |          |          |          |          |     |          |          |          |          |          |     |          |          |          |          |          |      |          |          |          |          |          |      |          |          |          |          |          |      |          |          |          |          |          |       |          |          |          |          |          |  |   |   |   |   |    |     |          |  |  |  |  |     |          |          |  |  |  |      |          |          |          |  |  |      |          |          |          |          |  |      |          |          |          |          |          |       |          |          |          |          |          |
| 2 B                                                                                                                           | 2.069031                                                                                                                                                                                                                                                                                                                                                                                                                                                                                                                                                                                                                                                                                                                                                                                                                                                                                                                                                                                                                                                                                                                                                                                                                                                                                                                                                                                                                                                                                                                                                                                                                                                                                                                                                                                                                                                                                                                                                   | 0.000000 |          |          |          |   |   |      |          |  |  |  |  |      |          |          |  |  |  |     |          |          |          |  |  |     |          |          |          |          |  |      |          |          |          |          |          |     |          |          |          |          |          |     |          |          |          |          |          |      |          |          |          |          |          |      |          |          |          |          |          |      |          |          |          |          |          |       |          |          |          |          |          |  |   |   |   |   |    |     |          |  |  |  |  |     |          |          |  |  |  |      |          |          |          |  |  |      |          |          |          |          |  |      |          |          |          |          |          |       |          |          |          |          |          |
| 3 B                                                                                                                           | 2.072285                                                                                                                                                                                                                                                                                                                                                                                                                                                                                                                                                                                                                                                                                                                                                                                                                                                                                                                                                                                                                                                                                                                                                                                                                                                                                                                                                                                                                                                                                                                                                                                                                                                                                                                                                                                                                                                                                                                                                   | 2.951037 | 0.000000 |          |          |   |   |      |          |  |  |  |  |      |          |          |  |  |  |     |          |          |          |  |  |     |          |          |          |          |  |      |          |          |          |          |          |     |          |          |          |          |          |     |          |          |          |          |          |      |          |          |          |          |          |      |          |          |          |          |          |      |          |          |          |          |          |       |          |          |          |          |          |  |   |   |   |   |    |     |          |  |  |  |  |     |          |          |  |  |  |      |          |          |          |  |  |      |          |          |          |          |  |      |          |          |          |          |          |       |          |          |          |          |          |
| 4 B                                                                                                                           | 3.419818                                                                                                                                                                                                                                                                                                                                                                                                                                                                                                                                                                                                                                                                                                                                                                                                                                                                                                                                                                                                                                                                                                                                                                                                                                                                                                                                                                                                                                                                                                                                                                                                                                                                                                                                                                                                                                                                                                                                                   | 3.151526 | 2.918340 | 0.000000 |          |   |   |      |          |  |  |  |  |      |          |          |  |  |  |     |          |          |          |  |  |     |          |          |          |          |  |      |          |          |          |          |          |     |          |          |          |          |          |     |          |          |          |          |          |      |          |          |          |          |          |      |          |          |          |          |          |      |          |          |          |          |          |       |          |          |          |          |          |  |   |   |   |   |    |     |          |  |  |  |  |     |          |          |  |  |  |      |          |          |          |  |  |      |          |          |          |          |  |      |          |          |          |          |          |       |          |          |          |          |          |
| 5 Se                                                                                                                          | 3.611772                                                                                                                                                                                                                                                                                                                                                                                                                                                                                                                                                                                                                                                                                                                                                                                                                                                                                                                                                                                                                                                                                                                                                                                                                                                                                                                                                                                                                                                                                                                                                                                                                                                                                                                                                                                                                                                                                                                                                   | 2.055489 | 3.220733 | 3.164021 | 0.000000 |   |   |      |          |  |  |  |  |      |          |          |  |  |  |     |          |          |          |  |  |     |          |          |          |          |  |      |          |          |          |          |          |     |          |          |          |          |          |     |          |          |          |          |          |      |          |          |          |          |          |      |          |          |          |          |          |      |          |          |          |          |          |       |          |          |          |          |          |  |   |   |   |   |    |     |          |  |  |  |  |     |          |          |  |  |  |      |          |          |          |  |  |      |          |          |          |          |  |      |          |          |          |          |          |       |          |          |          |          |          |
| 6 B                                                                                                                           | 3.304267                                                                                                                                                                                                                                                                                                                                                                                                                                                                                                                                                                                                                                                                                                                                                                                                                                                                                                                                                                                                                                                                                                                                                                                                                                                                                                                                                                                                                                                                                                                                                                                                                                                                                                                                                                                                                                                                                                                                                   | 3.530302 | 1.775737 | 1.744237 | 3.184350 |   |   |      |          |  |  |  |  |      |          |          |  |  |  |     |          |          |          |  |  |     |          |          |          |          |  |      |          |          |          |          |          |     |          |          |          |          |          |     |          |          |          |          |          |      |          |          |          |          |          |      |          |          |          |          |          |      |          |          |          |          |          |       |          |          |          |          |          |  |   |   |   |   |    |     |          |  |  |  |  |     |          |          |  |  |  |      |          |          |          |  |  |      |          |          |          |          |  |      |          |          |          |          |          |       |          |          |          |          |          |
| 7 B                                                                                                                           | 3.945576                                                                                                                                                                                                                                                                                                                                                                                                                                                                                                                                                                                                                                                                                                                                                                                                                                                                                                                                                                                                                                                                                                                                                                                                                                                                                                                                                                                                                                                                                                                                                                                                                                                                                                                                                                                                                                                                                                                                                   | 3.141391 | 2.922801 | 1.703119 | 2.060166 |   |   |      |          |  |  |  |  |      |          |          |  |  |  |     |          |          |          |  |  |     |          |          |          |          |  |      |          |          |          |          |          |     |          |          |          |          |          |     |          |          |          |          |          |      |          |          |          |          |          |      |          |          |          |          |          |      |          |          |          |          |          |       |          |          |          |          |          |  |   |   |   |   |    |     |          |  |  |  |  |     |          |          |  |  |  |      |          |          |          |  |  |      |          |          |          |          |  |      |          |          |          |          |          |       |          |          |          |          |          |
| 8 Se                                                                                                                          | 2.376595                                                                                                                                                                                                                                                                                                                                                                                                                                                                                                                                                                                                                                                                                                                                                                                                                                                                                                                                                                                                                                                                                                                                                                                                                                                                                                                                                                                                                                                                                                                                                                                                                                                                                                                                                                                                                                                                                                                                                   | 2.021362 | 3.258532 | 2.053906 | 3.298517 |   |   |      |          |  |  |  |  |      |          |          |  |  |  |     |          |          |          |  |  |     |          |          |          |          |  |      |          |          |          |          |          |     |          |          |          |          |          |     |          |          |          |          |          |      |          |          |          |          |          |      |          |          |          |          |          |      |          |          |          |          |          |       |          |          |          |          |          |  |   |   |   |   |    |     |          |  |  |  |  |     |          |          |  |  |  |      |          |          |          |  |  |      |          |          |          |          |  |      |          |          |          |          |          |       |          |          |          |          |          |
| 9 B                                                                                                                           | 2.167981                                                                                                                                                                                                                                                                                                                                                                                                                                                                                                                                                                                                                                                                                                                                                                                                                                                                                                                                                                                                                                                                                                                                                                                                                                                                                                                                                                                                                                                                                                                                                                                                                                                                                                                                                                                                                                                                                                                                                   | 3.070265 | 1.784495 | 1.831075 | 3.759693 |   |   |      |          |  |  |  |  |      |          |          |  |  |  |     |          |          |          |  |  |     |          |          |          |          |  |      |          |          |          |          |          |     |          |          |          |          |          |     |          |          |          |          |          |      |          |          |          |          |          |      |          |          |          |          |          |      |          |          |          |          |          |       |          |          |          |          |          |  |   |   |   |   |    |     |          |  |  |  |  |     |          |          |  |  |  |      |          |          |          |  |  |      |          |          |          |          |  |      |          |          |          |          |          |       |          |          |          |          |          |
| 10 B                                                                                                                          | 2.054640                                                                                                                                                                                                                                                                                                                                                                                                                                                                                                                                                                                                                                                                                                                                                                                                                                                                                                                                                                                                                                                                                                                                                                                                                                                                                                                                                                                                                                                                                                                                                                                                                                                                                                                                                                                                                                                                                                                                                   | 1.866165 | 1.742731 | 3.513588 | 2.148837 |   |   |      |          |  |  |  |  |      |          |          |  |  |  |     |          |          |          |  |  |     |          |          |          |          |  |      |          |          |          |          |          |     |          |          |          |          |          |     |          |          |          |          |          |      |          |          |          |          |          |      |          |          |          |          |          |      |          |          |          |          |          |       |          |          |          |          |          |  |   |   |   |   |    |     |          |  |  |  |  |     |          |          |  |  |  |      |          |          |          |  |  |      |          |          |          |          |  |      |          |          |          |          |          |       |          |          |          |          |          |
| 11 B                                                                                                                          | 3.334090                                                                                                                                                                                                                                                                                                                                                                                                                                                                                                                                                                                                                                                                                                                                                                                                                                                                                                                                                                                                                                                                                                                                                                                                                                                                                                                                                                                                                                                                                                                                                                                                                                                                                                                                                                                                                                                                                                                                                   | 3.046276 | 1.771245 | 2.889164 | 2.102823 |   |   |      |          |  |  |  |  |      |          |          |  |  |  |     |          |          |          |  |  |     |          |          |          |          |  |      |          |          |          |          |          |     |          |          |          |          |          |     |          |          |          |          |          |      |          |          |          |          |          |      |          |          |          |          |          |      |          |          |          |          |          |       |          |          |          |          |          |  |   |   |   |   |    |     |          |  |  |  |  |     |          |          |  |  |  |      |          |          |          |  |  |      |          |          |          |          |  |      |          |          |          |          |          |       |          |          |          |          |          |
|                                                                                                                               | 6                                                                                                                                                                                                                                                                                                                                                                                                                                                                                                                                                                                                                                                                                                                                                                                                                                                                                                                                                                                                                                                                                                                                                                                                                                                                                                                                                                                                                                                                                                                                                                                                                                                                                                                                                                                                                                                                                                                                                          | 7        | 8        | 9        | 10       |   |   |      |          |  |  |  |  |      |          |          |  |  |  |     |          |          |          |  |  |     |          |          |          |          |  |      |          |          |          |          |          |     |          |          |          |          |          |     |          |          |          |          |          |      |          |          |          |          |          |      |          |          |          |          |          |      |          |          |          |          |          |       |          |          |          |          |          |  |   |   |   |   |    |     |          |  |  |  |  |     |          |          |  |  |  |      |          |          |          |  |  |      |          |          |          |          |  |      |          |          |          |          |          |       |          |          |          |          |          |
| 6 B                                                                                                                           | 0.000000                                                                                                                                                                                                                                                                                                                                                                                                                                                                                                                                                                                                                                                                                                                                                                                                                                                                                                                                                                                                                                                                                                                                                                                                                                                                                                                                                                                                                                                                                                                                                                                                                                                                                                                                                                                                                                                                                                                                                   |          |          |          |          |   |   |      |          |  |  |  |  |      |          |          |  |  |  |     |          |          |          |  |  |     |          |          |          |          |  |      |          |          |          |          |          |     |          |          |          |          |          |     |          |          |          |          |          |      |          |          |          |          |          |      |          |          |          |          |          |      |          |          |          |          |          |       |          |          |          |          |          |  |   |   |   |   |    |     |          |  |  |  |  |     |          |          |  |  |  |      |          |          |          |  |  |      |          |          |          |          |  |      |          |          |          |          |          |       |          |          |          |          |          |
| 7 B                                                                                                                           | 1.757736                                                                                                                                                                                                                                                                                                                                                                                                                                                                                                                                                                                                                                                                                                                                                                                                                                                                                                                                                                                                                                                                                                                                                                                                                                                                                                                                                                                                                                                                                                                                                                                                                                                                                                                                                                                                                                                                                                                                                   | 0.000000 |          |          |          |   |   |      |          |  |  |  |  |      |          |          |  |  |  |     |          |          |          |  |  |     |          |          |          |          |  |      |          |          |          |          |          |     |          |          |          |          |          |     |          |          |          |          |          |      |          |          |          |          |          |      |          |          |          |          |          |      |          |          |          |          |          |       |          |          |          |          |          |  |   |   |   |   |    |     |          |  |  |  |  |     |          |          |  |  |  |      |          |          |          |  |  |      |          |          |          |          |  |      |          |          |          |          |          |       |          |          |          |          |          |
| 8 Se                                                                                                                          | 3.192897                                                                                                                                                                                                                                                                                                                                                                                                                                                                                                                                                                                                                                                                                                                                                                                                                                                                                                                                                                                                                                                                                                                                                                                                                                                                                                                                                                                                                                                                                                                                                                                                                                                                                                                                                                                                                                                                                                                                                   | 3.111517 | 0.000000 |          |          |   |   |      |          |  |  |  |  |      |          |          |  |  |  |     |          |          |          |  |  |     |          |          |          |          |  |      |          |          |          |          |          |     |          |          |          |          |          |     |          |          |          |          |          |      |          |          |          |          |          |      |          |          |          |          |          |      |          |          |          |          |          |       |          |          |          |          |          |  |   |   |   |   |    |     |          |  |  |  |  |     |          |          |  |  |  |      |          |          |          |  |  |      |          |          |          |          |  |      |          |          |          |          |          |       |          |          |          |          |          |
| 9 B                                                                                                                           | 1.722188                                                                                                                                                                                                                                                                                                                                                                                                                                                                                                                                                                                                                                                                                                                                                                                                                                                                                                                                                                                                                                                                                                                                                                                                                                                                                                                                                                                                                                                                                                                                                                                                                                                                                                                                                                                                                                                                                                                                                   | 2.874694 | 2.179532 | 0.000000 |          |   |   |      |          |  |  |  |  |      |          |          |  |  |  |     |          |          |          |  |  |     |          |          |          |          |  |      |          |          |          |          |          |     |          |          |          |          |          |     |          |          |          |          |          |      |          |          |          |          |          |      |          |          |          |          |          |      |          |          |          |          |          |       |          |          |          |          |          |  |   |   |   |   |    |     |          |  |  |  |  |     |          |          |  |  |  |      |          |          |          |  |  |      |          |          |          |          |  |      |          |          |          |          |          |       |          |          |          |          |          |
| 10 B                                                                                                                          | 2.903498                                                                                                                                                                                                                                                                                                                                                                                                                                                                                                                                                                                                                                                                                                                                                                                                                                                                                                                                                                                                                                                                                                                                                                                                                                                                                                                                                                                                                                                                                                                                                                                                                                                                                                                                                                                                                                                                                                                                                   | 3.054238 | 3.246822 | 2.941049 | 0.000000 |   |   |      |          |  |  |  |  |      |          |          |  |  |  |     |          |          |          |  |  |     |          |          |          |          |  |      |          |          |          |          |          |     |          |          |          |          |          |     |          |          |          |          |          |      |          |          |          |          |          |      |          |          |          |          |          |      |          |          |          |          |          |       |          |          |          |          |          |  |   |   |   |   |    |     |          |  |  |  |  |     |          |          |  |  |  |      |          |          |          |  |  |      |          |          |          |          |  |      |          |          |          |          |          |       |          |          |          |          |          |
| 11 B                                                                                                                          | 1.752047                                                                                                                                                                                                                                                                                                                                                                                                                                                                                                                                                                                                                                                                                                                                                                                                                                                                                                                                                                                                                                                                                                                                                                                                                                                                                                                                                                                                                                                                                                                                                                                                                                                                                                                                                                                                                                                                                                                                                   | 1.860319 | 3.742634 | 2.876546 | 1.857920 |   |   |      |          |  |  |  |  |      |          |          |  |  |  |     |          |          |          |  |  |     |          |          |          |          |  |      |          |          |          |          |          |     |          |          |          |          |          |     |          |          |          |          |          |      |          |          |          |          |          |      |          |          |          |          |          |      |          |          |          |          |          |       |          |          |          |          |          |  |   |   |   |   |    |     |          |  |  |  |  |     |          |          |  |  |  |      |          |          |          |  |  |      |          |          |          |          |  |      |          |          |          |          |          |       |          |          |          |          |          |

| 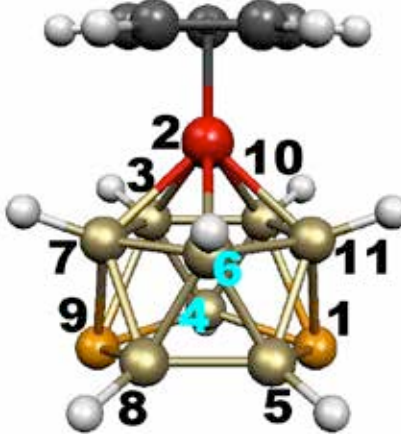 <p>5. -6582.8156162 +8.5 C<sub>s</sub></p>   | <table border="1"> <thead> <tr> <th></th> <th>1</th> <th>2</th> <th>3</th> <th>4</th> <th>5</th> </tr> </thead> <tbody> <tr><td>1 Se</td><td>0.000000</td><td></td><td></td><td></td><td></td></tr> <tr><td>2 Co</td><td>3.599465</td><td>0.000000</td><td></td><td></td><td></td></tr> <tr><td>3 B</td><td>3.230092</td><td>2.005630</td><td>0.000000</td><td></td><td></td></tr> <tr><td>4 B</td><td>2.040401</td><td>3.270786</td><td>1.805644</td><td>0.000000</td><td></td></tr> <tr><td>5 B</td><td>2.059306</td><td>3.291932</td><td>3.515721</td><td>3.141438</td><td>0.000000</td></tr> <tr><td>6 B</td><td>3.196709</td><td>2.056949</td><td>2.937277</td><td>3.522887</td><td>1.750200</td></tr> <tr><td>7 B</td><td>3.767711</td><td>2.051188</td><td>1.920226</td><td>3.054831</td><td>2.889017</td></tr> <tr><td>8 B</td><td>3.150120</td><td>3.291778</td><td>3.057012</td><td>3.141529</td><td>1.715903</td></tr> <tr><td>9 Se</td><td>3.311410</td><td>3.599267</td><td>2.148193</td><td>2.040407</td><td>3.150014</td></tr> <tr><td>10 B</td><td>2.148487</td><td>2.005682</td><td>1.756894</td><td>1.805599</td><td>3.057208</td></tr> <tr><td>11 B</td><td>2.136627</td><td>2.051358</td><td>2.965638</td><td>3.054418</td><td>1.832496</td></tr> <tr> <th></th> <th>6</th> <th>7</th> <th>8</th> <th>9</th> <th>10</th> </tr> <tr><td>6 B</td><td>0.000000</td><td></td><td></td><td></td><td></td></tr> <tr><td>7 B</td><td>1.748410</td><td>0.000000</td><td></td><td></td><td></td></tr> <tr><td>8 B</td><td>1.750340</td><td>1.832129</td><td>0.000000</td><td></td><td></td></tr> <tr><td>9 Se</td><td>3.196926</td><td>2.136931</td><td>2.059365</td><td>0.000000</td><td></td></tr> <tr><td>10 B</td><td>2.937210</td><td>2.965830</td><td>3.515802</td><td>3.229989</td><td>0.000000</td></tr> <tr><td>11 B</td><td>1.748449</td><td>2.907938</td><td>2.889256</td><td>3.767592</td><td>1.919897</td></tr> </tbody> </table> |          | 1        | 2        | 3        | 4 | 5 | 1 Se | 0.000000 |  |  |  |  | 2 Co | 3.599465 | 0.000000 |  |  |  | 3 B | 3.230092 | 2.005630 | 0.000000 |  |  | 4 B | 2.040401 | 3.270786 | 1.805644 | 0.000000 |  | 5 B  | 2.059306 | 3.291932 | 3.515721 | 3.141438 | 0.000000 | 6 B | 3.196709 | 2.056949 | 2.937277 | 3.522887 | 1.750200 | 7 B | 3.767711 | 2.051188 | 1.920226 | 3.054831 | 2.889017 | 8 B | 3.150120 | 3.291778 | 3.057012 | 3.141529 | 1.715903 | 9 Se | 3.311410 | 3.599267 | 2.148193 | 2.040407 | 3.150014 | 10 B  | 2.148487 | 2.005682 | 1.756894 | 1.805599 | 3.057208 | 11 B | 2.136627 | 2.051358 | 2.965638 | 3.054418 | 1.832496 |  | 6 | 7 | 8 | 9 | 10 | 6 B | 0.000000 |  |  |  |  | 7 B | 1.748410 | 0.000000 |  |  |  | 8 B | 1.750340 | 1.832129 | 0.000000 |  |  | 9 Se | 3.196926 | 2.136931 | 2.059365 | 0.000000 |  | 10 B  | 2.937210 | 2.965830 | 3.515802 | 3.229989 | 0.000000 | 11 B | 1.748449 | 2.907938 | 2.889256 | 3.767592 | 1.919897 |
|--------------------------------------------------------------------------------------------------------------------------------|-----------------------------------------------------------------------------------------------------------------------------------------------------------------------------------------------------------------------------------------------------------------------------------------------------------------------------------------------------------------------------------------------------------------------------------------------------------------------------------------------------------------------------------------------------------------------------------------------------------------------------------------------------------------------------------------------------------------------------------------------------------------------------------------------------------------------------------------------------------------------------------------------------------------------------------------------------------------------------------------------------------------------------------------------------------------------------------------------------------------------------------------------------------------------------------------------------------------------------------------------------------------------------------------------------------------------------------------------------------------------------------------------------------------------------------------------------------------------------------------------------------------------------------------------------------------------------------------------------------------------------------------------------------------------------------------------------------------------------------------------------------------------------------------------------------------------------------------------------------------------------------------------------------------------------------------------------------|----------|----------|----------|----------|---|---|------|----------|--|--|--|--|------|----------|----------|--|--|--|-----|----------|----------|----------|--|--|-----|----------|----------|----------|----------|--|------|----------|----------|----------|----------|----------|-----|----------|----------|----------|----------|----------|-----|----------|----------|----------|----------|----------|-----|----------|----------|----------|----------|----------|------|----------|----------|----------|----------|----------|-------|----------|----------|----------|----------|----------|------|----------|----------|----------|----------|----------|--|---|---|---|---|----|-----|----------|--|--|--|--|-----|----------|----------|--|--|--|-----|----------|----------|----------|--|--|------|----------|----------|----------|----------|--|-------|----------|----------|----------|----------|----------|------|----------|----------|----------|----------|----------|
|                                                                                                                                | 1                                                                                                                                                                                                                                                                                                                                                                                                                                                                                                                                                                                                                                                                                                                                                                                                                                                                                                                                                                                                                                                                                                                                                                                                                                                                                                                                                                                                                                                                                                                                                                                                                                                                                                                                                                                                                                                                                                                                                         | 2        | 3        | 4        | 5        |   |   |      |          |  |  |  |  |      |          |          |  |  |  |     |          |          |          |  |  |     |          |          |          |          |  |      |          |          |          |          |          |     |          |          |          |          |          |     |          |          |          |          |          |     |          |          |          |          |          |      |          |          |          |          |          |       |          |          |          |          |          |      |          |          |          |          |          |  |   |   |   |   |    |     |          |  |  |  |  |     |          |          |  |  |  |     |          |          |          |  |  |      |          |          |          |          |  |       |          |          |          |          |          |      |          |          |          |          |          |
| 1 Se                                                                                                                           | 0.000000                                                                                                                                                                                                                                                                                                                                                                                                                                                                                                                                                                                                                                                                                                                                                                                                                                                                                                                                                                                                                                                                                                                                                                                                                                                                                                                                                                                                                                                                                                                                                                                                                                                                                                                                                                                                                                                                                                                                                  |          |          |          |          |   |   |      |          |  |  |  |  |      |          |          |  |  |  |     |          |          |          |  |  |     |          |          |          |          |  |      |          |          |          |          |          |     |          |          |          |          |          |     |          |          |          |          |          |     |          |          |          |          |          |      |          |          |          |          |          |       |          |          |          |          |          |      |          |          |          |          |          |  |   |   |   |   |    |     |          |  |  |  |  |     |          |          |  |  |  |     |          |          |          |  |  |      |          |          |          |          |  |       |          |          |          |          |          |      |          |          |          |          |          |
| 2 Co                                                                                                                           | 3.599465                                                                                                                                                                                                                                                                                                                                                                                                                                                                                                                                                                                                                                                                                                                                                                                                                                                                                                                                                                                                                                                                                                                                                                                                                                                                                                                                                                                                                                                                                                                                                                                                                                                                                                                                                                                                                                                                                                                                                  | 0.000000 |          |          |          |   |   |      |          |  |  |  |  |      |          |          |  |  |  |     |          |          |          |  |  |     |          |          |          |          |  |      |          |          |          |          |          |     |          |          |          |          |          |     |          |          |          |          |          |     |          |          |          |          |          |      |          |          |          |          |          |       |          |          |          |          |          |      |          |          |          |          |          |  |   |   |   |   |    |     |          |  |  |  |  |     |          |          |  |  |  |     |          |          |          |  |  |      |          |          |          |          |  |       |          |          |          |          |          |      |          |          |          |          |          |
| 3 B                                                                                                                            | 3.230092                                                                                                                                                                                                                                                                                                                                                                                                                                                                                                                                                                                                                                                                                                                                                                                                                                                                                                                                                                                                                                                                                                                                                                                                                                                                                                                                                                                                                                                                                                                                                                                                                                                                                                                                                                                                                                                                                                                                                  | 2.005630 | 0.000000 |          |          |   |   |      |          |  |  |  |  |      |          |          |  |  |  |     |          |          |          |  |  |     |          |          |          |          |  |      |          |          |          |          |          |     |          |          |          |          |          |     |          |          |          |          |          |     |          |          |          |          |          |      |          |          |          |          |          |       |          |          |          |          |          |      |          |          |          |          |          |  |   |   |   |   |    |     |          |  |  |  |  |     |          |          |  |  |  |     |          |          |          |  |  |      |          |          |          |          |  |       |          |          |          |          |          |      |          |          |          |          |          |
| 4 B                                                                                                                            | 2.040401                                                                                                                                                                                                                                                                                                                                                                                                                                                                                                                                                                                                                                                                                                                                                                                                                                                                                                                                                                                                                                                                                                                                                                                                                                                                                                                                                                                                                                                                                                                                                                                                                                                                                                                                                                                                                                                                                                                                                  | 3.270786 | 1.805644 | 0.000000 |          |   |   |      |          |  |  |  |  |      |          |          |  |  |  |     |          |          |          |  |  |     |          |          |          |          |  |      |          |          |          |          |          |     |          |          |          |          |          |     |          |          |          |          |          |     |          |          |          |          |          |      |          |          |          |          |          |       |          |          |          |          |          |      |          |          |          |          |          |  |   |   |   |   |    |     |          |  |  |  |  |     |          |          |  |  |  |     |          |          |          |  |  |      |          |          |          |          |  |       |          |          |          |          |          |      |          |          |          |          |          |
| 5 B                                                                                                                            | 2.059306                                                                                                                                                                                                                                                                                                                                                                                                                                                                                                                                                                                                                                                                                                                                                                                                                                                                                                                                                                                                                                                                                                                                                                                                                                                                                                                                                                                                                                                                                                                                                                                                                                                                                                                                                                                                                                                                                                                                                  | 3.291932 | 3.515721 | 3.141438 | 0.000000 |   |   |      |          |  |  |  |  |      |          |          |  |  |  |     |          |          |          |  |  |     |          |          |          |          |  |      |          |          |          |          |          |     |          |          |          |          |          |     |          |          |          |          |          |     |          |          |          |          |          |      |          |          |          |          |          |       |          |          |          |          |          |      |          |          |          |          |          |  |   |   |   |   |    |     |          |  |  |  |  |     |          |          |  |  |  |     |          |          |          |  |  |      |          |          |          |          |  |       |          |          |          |          |          |      |          |          |          |          |          |
| 6 B                                                                                                                            | 3.196709                                                                                                                                                                                                                                                                                                                                                                                                                                                                                                                                                                                                                                                                                                                                                                                                                                                                                                                                                                                                                                                                                                                                                                                                                                                                                                                                                                                                                                                                                                                                                                                                                                                                                                                                                                                                                                                                                                                                                  | 2.056949 | 2.937277 | 3.522887 | 1.750200 |   |   |      |          |  |  |  |  |      |          |          |  |  |  |     |          |          |          |  |  |     |          |          |          |          |  |      |          |          |          |          |          |     |          |          |          |          |          |     |          |          |          |          |          |     |          |          |          |          |          |      |          |          |          |          |          |       |          |          |          |          |          |      |          |          |          |          |          |  |   |   |   |   |    |     |          |  |  |  |  |     |          |          |  |  |  |     |          |          |          |  |  |      |          |          |          |          |  |       |          |          |          |          |          |      |          |          |          |          |          |
| 7 B                                                                                                                            | 3.767711                                                                                                                                                                                                                                                                                                                                                                                                                                                                                                                                                                                                                                                                                                                                                                                                                                                                                                                                                                                                                                                                                                                                                                                                                                                                                                                                                                                                                                                                                                                                                                                                                                                                                                                                                                                                                                                                                                                                                  | 2.051188 | 1.920226 | 3.054831 | 2.889017 |   |   |      |          |  |  |  |  |      |          |          |  |  |  |     |          |          |          |  |  |     |          |          |          |          |  |      |          |          |          |          |          |     |          |          |          |          |          |     |          |          |          |          |          |     |          |          |          |          |          |      |          |          |          |          |          |       |          |          |          |          |          |      |          |          |          |          |          |  |   |   |   |   |    |     |          |  |  |  |  |     |          |          |  |  |  |     |          |          |          |  |  |      |          |          |          |          |  |       |          |          |          |          |          |      |          |          |          |          |          |
| 8 B                                                                                                                            | 3.150120                                                                                                                                                                                                                                                                                                                                                                                                                                                                                                                                                                                                                                                                                                                                                                                                                                                                                                                                                                                                                                                                                                                                                                                                                                                                                                                                                                                                                                                                                                                                                                                                                                                                                                                                                                                                                                                                                                                                                  | 3.291778 | 3.057012 | 3.141529 | 1.715903 |   |   |      |          |  |  |  |  |      |          |          |  |  |  |     |          |          |          |  |  |     |          |          |          |          |  |      |          |          |          |          |          |     |          |          |          |          |          |     |          |          |          |          |          |     |          |          |          |          |          |      |          |          |          |          |          |       |          |          |          |          |          |      |          |          |          |          |          |  |   |   |   |   |    |     |          |  |  |  |  |     |          |          |  |  |  |     |          |          |          |  |  |      |          |          |          |          |  |       |          |          |          |          |          |      |          |          |          |          |          |
| 9 Se                                                                                                                           | 3.311410                                                                                                                                                                                                                                                                                                                                                                                                                                                                                                                                                                                                                                                                                                                                                                                                                                                                                                                                                                                                                                                                                                                                                                                                                                                                                                                                                                                                                                                                                                                                                                                                                                                                                                                                                                                                                                                                                                                                                  | 3.599267 | 2.148193 | 2.040407 | 3.150014 |   |   |      |          |  |  |  |  |      |          |          |  |  |  |     |          |          |          |  |  |     |          |          |          |          |  |      |          |          |          |          |          |     |          |          |          |          |          |     |          |          |          |          |          |     |          |          |          |          |          |      |          |          |          |          |          |       |          |          |          |          |          |      |          |          |          |          |          |  |   |   |   |   |    |     |          |  |  |  |  |     |          |          |  |  |  |     |          |          |          |  |  |      |          |          |          |          |  |       |          |          |          |          |          |      |          |          |          |          |          |
| 10 B                                                                                                                           | 2.148487                                                                                                                                                                                                                                                                                                                                                                                                                                                                                                                                                                                                                                                                                                                                                                                                                                                                                                                                                                                                                                                                                                                                                                                                                                                                                                                                                                                                                                                                                                                                                                                                                                                                                                                                                                                                                                                                                                                                                  | 2.005682 | 1.756894 | 1.805599 | 3.057208 |   |   |      |          |  |  |  |  |      |          |          |  |  |  |     |          |          |          |  |  |     |          |          |          |          |  |      |          |          |          |          |          |     |          |          |          |          |          |     |          |          |          |          |          |     |          |          |          |          |          |      |          |          |          |          |          |       |          |          |          |          |          |      |          |          |          |          |          |  |   |   |   |   |    |     |          |  |  |  |  |     |          |          |  |  |  |     |          |          |          |  |  |      |          |          |          |          |  |       |          |          |          |          |          |      |          |          |          |          |          |
| 11 B                                                                                                                           | 2.136627                                                                                                                                                                                                                                                                                                                                                                                                                                                                                                                                                                                                                                                                                                                                                                                                                                                                                                                                                                                                                                                                                                                                                                                                                                                                                                                                                                                                                                                                                                                                                                                                                                                                                                                                                                                                                                                                                                                                                  | 2.051358 | 2.965638 | 3.054418 | 1.832496 |   |   |      |          |  |  |  |  |      |          |          |  |  |  |     |          |          |          |  |  |     |          |          |          |          |  |      |          |          |          |          |          |     |          |          |          |          |          |     |          |          |          |          |          |     |          |          |          |          |          |      |          |          |          |          |          |       |          |          |          |          |          |      |          |          |          |          |          |  |   |   |   |   |    |     |          |  |  |  |  |     |          |          |  |  |  |     |          |          |          |  |  |      |          |          |          |          |  |       |          |          |          |          |          |      |          |          |          |          |          |
|                                                                                                                                | 6                                                                                                                                                                                                                                                                                                                                                                                                                                                                                                                                                                                                                                                                                                                                                                                                                                                                                                                                                                                                                                                                                                                                                                                                                                                                                                                                                                                                                                                                                                                                                                                                                                                                                                                                                                                                                                                                                                                                                         | 7        | 8        | 9        | 10       |   |   |      |          |  |  |  |  |      |          |          |  |  |  |     |          |          |          |  |  |     |          |          |          |          |  |      |          |          |          |          |          |     |          |          |          |          |          |     |          |          |          |          |          |     |          |          |          |          |          |      |          |          |          |          |          |       |          |          |          |          |          |      |          |          |          |          |          |  |   |   |   |   |    |     |          |  |  |  |  |     |          |          |  |  |  |     |          |          |          |  |  |      |          |          |          |          |  |       |          |          |          |          |          |      |          |          |          |          |          |
| 6 B                                                                                                                            | 0.000000                                                                                                                                                                                                                                                                                                                                                                                                                                                                                                                                                                                                                                                                                                                                                                                                                                                                                                                                                                                                                                                                                                                                                                                                                                                                                                                                                                                                                                                                                                                                                                                                                                                                                                                                                                                                                                                                                                                                                  |          |          |          |          |   |   |      |          |  |  |  |  |      |          |          |  |  |  |     |          |          |          |  |  |     |          |          |          |          |  |      |          |          |          |          |          |     |          |          |          |          |          |     |          |          |          |          |          |     |          |          |          |          |          |      |          |          |          |          |          |       |          |          |          |          |          |      |          |          |          |          |          |  |   |   |   |   |    |     |          |  |  |  |  |     |          |          |  |  |  |     |          |          |          |  |  |      |          |          |          |          |  |       |          |          |          |          |          |      |          |          |          |          |          |
| 7 B                                                                                                                            | 1.748410                                                                                                                                                                                                                                                                                                                                                                                                                                                                                                                                                                                                                                                                                                                                                                                                                                                                                                                                                                                                                                                                                                                                                                                                                                                                                                                                                                                                                                                                                                                                                                                                                                                                                                                                                                                                                                                                                                                                                  | 0.000000 |          |          |          |   |   |      |          |  |  |  |  |      |          |          |  |  |  |     |          |          |          |  |  |     |          |          |          |          |  |      |          |          |          |          |          |     |          |          |          |          |          |     |          |          |          |          |          |     |          |          |          |          |          |      |          |          |          |          |          |       |          |          |          |          |          |      |          |          |          |          |          |  |   |   |   |   |    |     |          |  |  |  |  |     |          |          |  |  |  |     |          |          |          |  |  |      |          |          |          |          |  |       |          |          |          |          |          |      |          |          |          |          |          |
| 8 B                                                                                                                            | 1.750340                                                                                                                                                                                                                                                                                                                                                                                                                                                                                                                                                                                                                                                                                                                                                                                                                                                                                                                                                                                                                                                                                                                                                                                                                                                                                                                                                                                                                                                                                                                                                                                                                                                                                                                                                                                                                                                                                                                                                  | 1.832129 | 0.000000 |          |          |   |   |      |          |  |  |  |  |      |          |          |  |  |  |     |          |          |          |  |  |     |          |          |          |          |  |      |          |          |          |          |          |     |          |          |          |          |          |     |          |          |          |          |          |     |          |          |          |          |          |      |          |          |          |          |          |       |          |          |          |          |          |      |          |          |          |          |          |  |   |   |   |   |    |     |          |  |  |  |  |     |          |          |  |  |  |     |          |          |          |  |  |      |          |          |          |          |  |       |          |          |          |          |          |      |          |          |          |          |          |
| 9 Se                                                                                                                           | 3.196926                                                                                                                                                                                                                                                                                                                                                                                                                                                                                                                                                                                                                                                                                                                                                                                                                                                                                                                                                                                                                                                                                                                                                                                                                                                                                                                                                                                                                                                                                                                                                                                                                                                                                                                                                                                                                                                                                                                                                  | 2.136931 | 2.059365 | 0.000000 |          |   |   |      |          |  |  |  |  |      |          |          |  |  |  |     |          |          |          |  |  |     |          |          |          |          |  |      |          |          |          |          |          |     |          |          |          |          |          |     |          |          |          |          |          |     |          |          |          |          |          |      |          |          |          |          |          |       |          |          |          |          |          |      |          |          |          |          |          |  |   |   |   |   |    |     |          |  |  |  |  |     |          |          |  |  |  |     |          |          |          |  |  |      |          |          |          |          |  |       |          |          |          |          |          |      |          |          |          |          |          |
| 10 B                                                                                                                           | 2.937210                                                                                                                                                                                                                                                                                                                                                                                                                                                                                                                                                                                                                                                                                                                                                                                                                                                                                                                                                                                                                                                                                                                                                                                                                                                                                                                                                                                                                                                                                                                                                                                                                                                                                                                                                                                                                                                                                                                                                  | 2.965830 | 3.515802 | 3.229989 | 0.000000 |   |   |      |          |  |  |  |  |      |          |          |  |  |  |     |          |          |          |  |  |     |          |          |          |          |  |      |          |          |          |          |          |     |          |          |          |          |          |     |          |          |          |          |          |     |          |          |          |          |          |      |          |          |          |          |          |       |          |          |          |          |          |      |          |          |          |          |          |  |   |   |   |   |    |     |          |  |  |  |  |     |          |          |  |  |  |     |          |          |          |  |  |      |          |          |          |          |  |       |          |          |          |          |          |      |          |          |          |          |          |
| 11 B                                                                                                                           | 1.748449                                                                                                                                                                                                                                                                                                                                                                                                                                                                                                                                                                                                                                                                                                                                                                                                                                                                                                                                                                                                                                                                                                                                                                                                                                                                                                                                                                                                                                                                                                                                                                                                                                                                                                                                                                                                                                                                                                                                                  | 2.907938 | 2.889256 | 3.767592 | 1.919897 |   |   |      |          |  |  |  |  |      |          |          |  |  |  |     |          |          |          |  |  |     |          |          |          |          |  |      |          |          |          |          |          |     |          |          |          |          |          |     |          |          |          |          |          |     |          |          |          |          |          |      |          |          |          |          |          |       |          |          |          |          |          |      |          |          |          |          |          |  |   |   |   |   |    |     |          |  |  |  |  |     |          |          |  |  |  |     |          |          |          |  |  |      |          |          |          |          |  |       |          |          |          |          |          |      |          |          |          |          |          |
|  <p>6. -6582.8051844 +15.1 C<sub>s</sub></p> | <table border="1"> <thead> <tr> <th></th> <th>1</th> <th>2</th> <th>3</th> <th>4</th> <th>5</th> </tr> </thead> <tbody> <tr><td>1 B</td><td>0.000000</td><td></td><td></td><td></td><td></td></tr> <tr><td>2 Se</td><td>3.147700</td><td>0.000000</td><td></td><td></td><td></td></tr> <tr><td>3 B</td><td>3.156875</td><td>2.030910</td><td>0.000000</td><td></td><td></td></tr> <tr><td>4 B</td><td>1.911375</td><td>3.751772</td><td>3.039235</td><td>0.000000</td><td></td></tr> <tr><td>5 Co</td><td>2.071692</td><td>3.595865</td><td>3.985291</td><td>2.011080</td><td>0.000000</td></tr> <tr><td>6 B</td><td>2.910727</td><td>2.130214</td><td>3.039076</td><td>2.879288</td><td>2.011163</td></tr> <tr><td>7 B</td><td>3.522694</td><td>2.112550</td><td>1.812307</td><td>2.925415</td><td>3.294108</td></tr> <tr><td>8 B</td><td>2.962637</td><td>3.216358</td><td>2.916320</td><td>1.770084</td><td>2.043200</td></tr> <tr><td>9 B</td><td>3.074512</td><td>3.211739</td><td>1.812307</td><td>1.863033</td><td>3.294117</td></tr> <tr><td>10 Se</td><td>2.089026</td><td>3.312406</td><td>2.030901</td><td>2.130184</td><td>3.595767</td></tr> <tr><td>11 B</td><td>1.673781</td><td>2.088917</td><td>3.156802</td><td>2.910785</td><td>2.071747</td></tr> <tr> <th></th> <th>6</th> <th>7</th> <th>8</th> <th>9</th> <th>10</th> </tr> <tr><td>6 B</td><td>0.000000</td><td></td><td></td><td></td><td></td></tr> <tr><td>7 B</td><td>1.862803</td><td>0.000000</td><td></td><td></td><td></td></tr> <tr><td>8 B</td><td>1.770073</td><td>1.752452</td><td>0.000000</td><td></td><td></td></tr> <tr><td>9 B</td><td>2.925235</td><td>1.766777</td><td>1.752370</td><td>0.000000</td><td></td></tr> <tr><td>10 Se</td><td>3.751592</td><td>3.211685</td><td>3.216193</td><td>2.112523</td><td>0.000000</td></tr> <tr><td>11 B</td><td>1.911295</td><td>3.074343</td><td>2.962619</td><td>3.522674</td><td>3.147709</td></tr> </tbody> </table> |          | 1        | 2        | 3        | 4 | 5 | 1 B  | 0.000000 |  |  |  |  | 2 Se | 3.147700 | 0.000000 |  |  |  | 3 B | 3.156875 | 2.030910 | 0.000000 |  |  | 4 B | 1.911375 | 3.751772 | 3.039235 | 0.000000 |  | 5 Co | 2.071692 | 3.595865 | 3.985291 | 2.011080 | 0.000000 | 6 B | 2.910727 | 2.130214 | 3.039076 | 2.879288 | 2.011163 | 7 B | 3.522694 | 2.112550 | 1.812307 | 2.925415 | 3.294108 | 8 B | 2.962637 | 3.216358 | 2.916320 | 1.770084 | 2.043200 | 9 B  | 3.074512 | 3.211739 | 1.812307 | 1.863033 | 3.294117 | 10 Se | 2.089026 | 3.312406 | 2.030901 | 2.130184 | 3.595767 | 11 B | 1.673781 | 2.088917 | 3.156802 | 2.910785 | 2.071747 |  | 6 | 7 | 8 | 9 | 10 | 6 B | 0.000000 |  |  |  |  | 7 B | 1.862803 | 0.000000 |  |  |  | 8 B | 1.770073 | 1.752452 | 0.000000 |  |  | 9 B  | 2.925235 | 1.766777 | 1.752370 | 0.000000 |  | 10 Se | 3.751592 | 3.211685 | 3.216193 | 2.112523 | 0.000000 | 11 B | 1.911295 | 3.074343 | 2.962619 | 3.522674 | 3.147709 |
|                                                                                                                                | 1                                                                                                                                                                                                                                                                                                                                                                                                                                                                                                                                                                                                                                                                                                                                                                                                                                                                                                                                                                                                                                                                                                                                                                                                                                                                                                                                                                                                                                                                                                                                                                                                                                                                                                                                                                                                                                                                                                                                                         | 2        | 3        | 4        | 5        |   |   |      |          |  |  |  |  |      |          |          |  |  |  |     |          |          |          |  |  |     |          |          |          |          |  |      |          |          |          |          |          |     |          |          |          |          |          |     |          |          |          |          |          |     |          |          |          |          |          |      |          |          |          |          |          |       |          |          |          |          |          |      |          |          |          |          |          |  |   |   |   |   |    |     |          |  |  |  |  |     |          |          |  |  |  |     |          |          |          |  |  |      |          |          |          |          |  |       |          |          |          |          |          |      |          |          |          |          |          |
| 1 B                                                                                                                            | 0.000000                                                                                                                                                                                                                                                                                                                                                                                                                                                                                                                                                                                                                                                                                                                                                                                                                                                                                                                                                                                                                                                                                                                                                                                                                                                                                                                                                                                                                                                                                                                                                                                                                                                                                                                                                                                                                                                                                                                                                  |          |          |          |          |   |   |      |          |  |  |  |  |      |          |          |  |  |  |     |          |          |          |  |  |     |          |          |          |          |  |      |          |          |          |          |          |     |          |          |          |          |          |     |          |          |          |          |          |     |          |          |          |          |          |      |          |          |          |          |          |       |          |          |          |          |          |      |          |          |          |          |          |  |   |   |   |   |    |     |          |  |  |  |  |     |          |          |  |  |  |     |          |          |          |  |  |      |          |          |          |          |  |       |          |          |          |          |          |      |          |          |          |          |          |
| 2 Se                                                                                                                           | 3.147700                                                                                                                                                                                                                                                                                                                                                                                                                                                                                                                                                                                                                                                                                                                                                                                                                                                                                                                                                                                                                                                                                                                                                                                                                                                                                                                                                                                                                                                                                                                                                                                                                                                                                                                                                                                                                                                                                                                                                  | 0.000000 |          |          |          |   |   |      |          |  |  |  |  |      |          |          |  |  |  |     |          |          |          |  |  |     |          |          |          |          |  |      |          |          |          |          |          |     |          |          |          |          |          |     |          |          |          |          |          |     |          |          |          |          |          |      |          |          |          |          |          |       |          |          |          |          |          |      |          |          |          |          |          |  |   |   |   |   |    |     |          |  |  |  |  |     |          |          |  |  |  |     |          |          |          |  |  |      |          |          |          |          |  |       |          |          |          |          |          |      |          |          |          |          |          |
| 3 B                                                                                                                            | 3.156875                                                                                                                                                                                                                                                                                                                                                                                                                                                                                                                                                                                                                                                                                                                                                                                                                                                                                                                                                                                                                                                                                                                                                                                                                                                                                                                                                                                                                                                                                                                                                                                                                                                                                                                                                                                                                                                                                                                                                  | 2.030910 | 0.000000 |          |          |   |   |      |          |  |  |  |  |      |          |          |  |  |  |     |          |          |          |  |  |     |          |          |          |          |  |      |          |          |          |          |          |     |          |          |          |          |          |     |          |          |          |          |          |     |          |          |          |          |          |      |          |          |          |          |          |       |          |          |          |          |          |      |          |          |          |          |          |  |   |   |   |   |    |     |          |  |  |  |  |     |          |          |  |  |  |     |          |          |          |  |  |      |          |          |          |          |  |       |          |          |          |          |          |      |          |          |          |          |          |
| 4 B                                                                                                                            | 1.911375                                                                                                                                                                                                                                                                                                                                                                                                                                                                                                                                                                                                                                                                                                                                                                                                                                                                                                                                                                                                                                                                                                                                                                                                                                                                                                                                                                                                                                                                                                                                                                                                                                                                                                                                                                                                                                                                                                                                                  | 3.751772 | 3.039235 | 0.000000 |          |   |   |      |          |  |  |  |  |      |          |          |  |  |  |     |          |          |          |  |  |     |          |          |          |          |  |      |          |          |          |          |          |     |          |          |          |          |          |     |          |          |          |          |          |     |          |          |          |          |          |      |          |          |          |          |          |       |          |          |          |          |          |      |          |          |          |          |          |  |   |   |   |   |    |     |          |  |  |  |  |     |          |          |  |  |  |     |          |          |          |  |  |      |          |          |          |          |  |       |          |          |          |          |          |      |          |          |          |          |          |
| 5 Co                                                                                                                           | 2.071692                                                                                                                                                                                                                                                                                                                                                                                                                                                                                                                                                                                                                                                                                                                                                                                                                                                                                                                                                                                                                                                                                                                                                                                                                                                                                                                                                                                                                                                                                                                                                                                                                                                                                                                                                                                                                                                                                                                                                  | 3.595865 | 3.985291 | 2.011080 | 0.000000 |   |   |      |          |  |  |  |  |      |          |          |  |  |  |     |          |          |          |  |  |     |          |          |          |          |  |      |          |          |          |          |          |     |          |          |          |          |          |     |          |          |          |          |          |     |          |          |          |          |          |      |          |          |          |          |          |       |          |          |          |          |          |      |          |          |          |          |          |  |   |   |   |   |    |     |          |  |  |  |  |     |          |          |  |  |  |     |          |          |          |  |  |      |          |          |          |          |  |       |          |          |          |          |          |      |          |          |          |          |          |
| 6 B                                                                                                                            | 2.910727                                                                                                                                                                                                                                                                                                                                                                                                                                                                                                                                                                                                                                                                                                                                                                                                                                                                                                                                                                                                                                                                                                                                                                                                                                                                                                                                                                                                                                                                                                                                                                                                                                                                                                                                                                                                                                                                                                                                                  | 2.130214 | 3.039076 | 2.879288 | 2.011163 |   |   |      |          |  |  |  |  |      |          |          |  |  |  |     |          |          |          |  |  |     |          |          |          |          |  |      |          |          |          |          |          |     |          |          |          |          |          |     |          |          |          |          |          |     |          |          |          |          |          |      |          |          |          |          |          |       |          |          |          |          |          |      |          |          |          |          |          |  |   |   |   |   |    |     |          |  |  |  |  |     |          |          |  |  |  |     |          |          |          |  |  |      |          |          |          |          |  |       |          |          |          |          |          |      |          |          |          |          |          |
| 7 B                                                                                                                            | 3.522694                                                                                                                                                                                                                                                                                                                                                                                                                                                                                                                                                                                                                                                                                                                                                                                                                                                                                                                                                                                                                                                                                                                                                                                                                                                                                                                                                                                                                                                                                                                                                                                                                                                                                                                                                                                                                                                                                                                                                  | 2.112550 | 1.812307 | 2.925415 | 3.294108 |   |   |      |          |  |  |  |  |      |          |          |  |  |  |     |          |          |          |  |  |     |          |          |          |          |  |      |          |          |          |          |          |     |          |          |          |          |          |     |          |          |          |          |          |     |          |          |          |          |          |      |          |          |          |          |          |       |          |          |          |          |          |      |          |          |          |          |          |  |   |   |   |   |    |     |          |  |  |  |  |     |          |          |  |  |  |     |          |          |          |  |  |      |          |          |          |          |  |       |          |          |          |          |          |      |          |          |          |          |          |
| 8 B                                                                                                                            | 2.962637                                                                                                                                                                                                                                                                                                                                                                                                                                                                                                                                                                                                                                                                                                                                                                                                                                                                                                                                                                                                                                                                                                                                                                                                                                                                                                                                                                                                                                                                                                                                                                                                                                                                                                                                                                                                                                                                                                                                                  | 3.216358 | 2.916320 | 1.770084 | 2.043200 |   |   |      |          |  |  |  |  |      |          |          |  |  |  |     |          |          |          |  |  |     |          |          |          |          |  |      |          |          |          |          |          |     |          |          |          |          |          |     |          |          |          |          |          |     |          |          |          |          |          |      |          |          |          |          |          |       |          |          |          |          |          |      |          |          |          |          |          |  |   |   |   |   |    |     |          |  |  |  |  |     |          |          |  |  |  |     |          |          |          |  |  |      |          |          |          |          |  |       |          |          |          |          |          |      |          |          |          |          |          |
| 9 B                                                                                                                            | 3.074512                                                                                                                                                                                                                                                                                                                                                                                                                                                                                                                                                                                                                                                                                                                                                                                                                                                                                                                                                                                                                                                                                                                                                                                                                                                                                                                                                                                                                                                                                                                                                                                                                                                                                                                                                                                                                                                                                                                                                  | 3.211739 | 1.812307 | 1.863033 | 3.294117 |   |   |      |          |  |  |  |  |      |          |          |  |  |  |     |          |          |          |  |  |     |          |          |          |          |  |      |          |          |          |          |          |     |          |          |          |          |          |     |          |          |          |          |          |     |          |          |          |          |          |      |          |          |          |          |          |       |          |          |          |          |          |      |          |          |          |          |          |  |   |   |   |   |    |     |          |  |  |  |  |     |          |          |  |  |  |     |          |          |          |  |  |      |          |          |          |          |  |       |          |          |          |          |          |      |          |          |          |          |          |
| 10 Se                                                                                                                          | 2.089026                                                                                                                                                                                                                                                                                                                                                                                                                                                                                                                                                                                                                                                                                                                                                                                                                                                                                                                                                                                                                                                                                                                                                                                                                                                                                                                                                                                                                                                                                                                                                                                                                                                                                                                                                                                                                                                                                                                                                  | 3.312406 | 2.030901 | 2.130184 | 3.595767 |   |   |      |          |  |  |  |  |      |          |          |  |  |  |     |          |          |          |  |  |     |          |          |          |          |  |      |          |          |          |          |          |     |          |          |          |          |          |     |          |          |          |          |          |     |          |          |          |          |          |      |          |          |          |          |          |       |          |          |          |          |          |      |          |          |          |          |          |  |   |   |   |   |    |     |          |  |  |  |  |     |          |          |  |  |  |     |          |          |          |  |  |      |          |          |          |          |  |       |          |          |          |          |          |      |          |          |          |          |          |
| 11 B                                                                                                                           | 1.673781                                                                                                                                                                                                                                                                                                                                                                                                                                                                                                                                                                                                                                                                                                                                                                                                                                                                                                                                                                                                                                                                                                                                                                                                                                                                                                                                                                                                                                                                                                                                                                                                                                                                                                                                                                                                                                                                                                                                                  | 2.088917 | 3.156802 | 2.910785 | 2.071747 |   |   |      |          |  |  |  |  |      |          |          |  |  |  |     |          |          |          |  |  |     |          |          |          |          |  |      |          |          |          |          |          |     |          |          |          |          |          |     |          |          |          |          |          |     |          |          |          |          |          |      |          |          |          |          |          |       |          |          |          |          |          |      |          |          |          |          |          |  |   |   |   |   |    |     |          |  |  |  |  |     |          |          |  |  |  |     |          |          |          |  |  |      |          |          |          |          |  |       |          |          |          |          |          |      |          |          |          |          |          |
|                                                                                                                                | 6                                                                                                                                                                                                                                                                                                                                                                                                                                                                                                                                                                                                                                                                                                                                                                                                                                                                                                                                                                                                                                                                                                                                                                                                                                                                                                                                                                                                                                                                                                                                                                                                                                                                                                                                                                                                                                                                                                                                                         | 7        | 8        | 9        | 10       |   |   |      |          |  |  |  |  |      |          |          |  |  |  |     |          |          |          |  |  |     |          |          |          |          |  |      |          |          |          |          |          |     |          |          |          |          |          |     |          |          |          |          |          |     |          |          |          |          |          |      |          |          |          |          |          |       |          |          |          |          |          |      |          |          |          |          |          |  |   |   |   |   |    |     |          |  |  |  |  |     |          |          |  |  |  |     |          |          |          |  |  |      |          |          |          |          |  |       |          |          |          |          |          |      |          |          |          |          |          |
| 6 B                                                                                                                            | 0.000000                                                                                                                                                                                                                                                                                                                                                                                                                                                                                                                                                                                                                                                                                                                                                                                                                                                                                                                                                                                                                                                                                                                                                                                                                                                                                                                                                                                                                                                                                                                                                                                                                                                                                                                                                                                                                                                                                                                                                  |          |          |          |          |   |   |      |          |  |  |  |  |      |          |          |  |  |  |     |          |          |          |  |  |     |          |          |          |          |  |      |          |          |          |          |          |     |          |          |          |          |          |     |          |          |          |          |          |     |          |          |          |          |          |      |          |          |          |          |          |       |          |          |          |          |          |      |          |          |          |          |          |  |   |   |   |   |    |     |          |  |  |  |  |     |          |          |  |  |  |     |          |          |          |  |  |      |          |          |          |          |  |       |          |          |          |          |          |      |          |          |          |          |          |
| 7 B                                                                                                                            | 1.862803                                                                                                                                                                                                                                                                                                                                                                                                                                                                                                                                                                                                                                                                                                                                                                                                                                                                                                                                                                                                                                                                                                                                                                                                                                                                                                                                                                                                                                                                                                                                                                                                                                                                                                                                                                                                                                                                                                                                                  | 0.000000 |          |          |          |   |   |      |          |  |  |  |  |      |          |          |  |  |  |     |          |          |          |  |  |     |          |          |          |          |  |      |          |          |          |          |          |     |          |          |          |          |          |     |          |          |          |          |          |     |          |          |          |          |          |      |          |          |          |          |          |       |          |          |          |          |          |      |          |          |          |          |          |  |   |   |   |   |    |     |          |  |  |  |  |     |          |          |  |  |  |     |          |          |          |  |  |      |          |          |          |          |  |       |          |          |          |          |          |      |          |          |          |          |          |
| 8 B                                                                                                                            | 1.770073                                                                                                                                                                                                                                                                                                                                                                                                                                                                                                                                                                                                                                                                                                                                                                                                                                                                                                                                                                                                                                                                                                                                                                                                                                                                                                                                                                                                                                                                                                                                                                                                                                                                                                                                                                                                                                                                                                                                                  | 1.752452 | 0.000000 |          |          |   |   |      |          |  |  |  |  |      |          |          |  |  |  |     |          |          |          |  |  |     |          |          |          |          |  |      |          |          |          |          |          |     |          |          |          |          |          |     |          |          |          |          |          |     |          |          |          |          |          |      |          |          |          |          |          |       |          |          |          |          |          |      |          |          |          |          |          |  |   |   |   |   |    |     |          |  |  |  |  |     |          |          |  |  |  |     |          |          |          |  |  |      |          |          |          |          |  |       |          |          |          |          |          |      |          |          |          |          |          |
| 9 B                                                                                                                            | 2.925235                                                                                                                                                                                                                                                                                                                                                                                                                                                                                                                                                                                                                                                                                                                                                                                                                                                                                                                                                                                                                                                                                                                                                                                                                                                                                                                                                                                                                                                                                                                                                                                                                                                                                                                                                                                                                                                                                                                                                  | 1.766777 | 1.752370 | 0.000000 |          |   |   |      |          |  |  |  |  |      |          |          |  |  |  |     |          |          |          |  |  |     |          |          |          |          |  |      |          |          |          |          |          |     |          |          |          |          |          |     |          |          |          |          |          |     |          |          |          |          |          |      |          |          |          |          |          |       |          |          |          |          |          |      |          |          |          |          |          |  |   |   |   |   |    |     |          |  |  |  |  |     |          |          |  |  |  |     |          |          |          |  |  |      |          |          |          |          |  |       |          |          |          |          |          |      |          |          |          |          |          |
| 10 Se                                                                                                                          | 3.751592                                                                                                                                                                                                                                                                                                                                                                                                                                                                                                                                                                                                                                                                                                                                                                                                                                                                                                                                                                                                                                                                                                                                                                                                                                                                                                                                                                                                                                                                                                                                                                                                                                                                                                                                                                                                                                                                                                                                                  | 3.211685 | 3.216193 | 2.112523 | 0.000000 |   |   |      |          |  |  |  |  |      |          |          |  |  |  |     |          |          |          |  |  |     |          |          |          |          |  |      |          |          |          |          |          |     |          |          |          |          |          |     |          |          |          |          |          |     |          |          |          |          |          |      |          |          |          |          |          |       |          |          |          |          |          |      |          |          |          |          |          |  |   |   |   |   |    |     |          |  |  |  |  |     |          |          |  |  |  |     |          |          |          |  |  |      |          |          |          |          |  |       |          |          |          |          |          |      |          |          |          |          |          |
| 11 B                                                                                                                           | 1.911295                                                                                                                                                                                                                                                                                                                                                                                                                                                                                                                                                                                                                                                                                                                                                                                                                                                                                                                                                                                                                                                                                                                                                                                                                                                                                                                                                                                                                                                                                                                                                                                                                                                                                                                                                                                                                                                                                                                                                  | 3.074343 | 2.962619 | 3.522674 | 3.147709 |   |   |      |          |  |  |  |  |      |          |          |  |  |  |     |          |          |          |  |  |     |          |          |          |          |  |      |          |          |          |          |          |     |          |          |          |          |          |     |          |          |          |          |          |     |          |          |          |          |          |      |          |          |          |          |          |       |          |          |          |          |          |      |          |          |          |          |          |  |   |   |   |   |    |     |          |  |  |  |  |     |          |          |  |  |  |     |          |          |          |  |  |      |          |          |          |          |  |       |          |          |          |          |          |      |          |          |          |          |          |

| 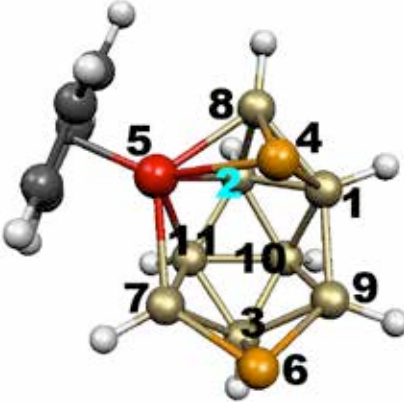 <p>7. -6582.7986749 +19.2 C<sub>1</sub></p>  | <table border="1"> <thead> <tr> <th></th> <th>1</th> <th>2</th> <th>3</th> <th>4</th> <th>5</th> </tr> </thead> <tbody> <tr><td>1 B</td><td>0.000000</td><td></td><td></td><td></td><td></td></tr> <tr><td>2 B</td><td>1.822617</td><td>0.000000</td><td></td><td></td><td></td></tr> <tr><td>3 B</td><td>3.056588</td><td>2.976212</td><td>0.000000</td><td></td><td></td></tr> <tr><td>4 Se</td><td>2.103545</td><td>2.952755</td><td>3.899174</td><td>0.000000</td><td></td></tr> <tr><td>5 Co</td><td>2.952501</td><td>2.125095</td><td>3.386792</td><td>2.394423</td><td>0.000000</td></tr> <tr><td>6 Se</td><td>3.485058</td><td>4.081925</td><td>2.058887</td><td>3.323620</td><td>3.668304</td></tr> <tr><td>7 B</td><td>3.423879</td><td>3.048563</td><td>1.847284</td><td>3.249489</td><td>2.185288</td></tr> <tr><td>8 B</td><td>1.836694</td><td>1.708819</td><td>4.117156</td><td>1.929645</td><td>2.104208</td></tr> <tr><td>9 B</td><td>1.927292</td><td>2.992675</td><td>1.873096</td><td>2.932983</td><td>3.648449</td></tr> <tr><td>10 B</td><td>1.766194</td><td>1.751286</td><td>1.744234</td><td>3.400590</td><td>3.177810</td></tr> <tr><td>11 B</td><td>2.830900</td><td>1.761606</td><td>1.758018</td><td>3.540488</td><td>2.116428</td></tr> <tr> <th></th> <th>6</th> <th>7</th> <th>8</th> <th>9</th> <th>10</th> </tr> <tr><td>6 Se</td><td>0.000000</td><td></td><td></td><td></td><td></td></tr> <tr><td>7 B</td><td>2.015873</td><td>0.000000</td><td></td><td></td><td></td></tr> <tr><td>8 B</td><td>4.475475</td><td>3.719350</td><td>0.000000</td><td></td><td></td></tr> <tr><td>9 B</td><td>2.018048</td><td>2.825264</td><td>3.520549</td><td>0.000000</td><td></td></tr> <tr><td>10 B</td><td>3.164399</td><td>2.829585</td><td>3.004217</td><td>1.707288</td><td>0.000000</td></tr> <tr><td>11 B</td><td>3.175986</td><td>1.720545</td><td>3.100138</td><td>2.824746</td><td>1.790113</td></tr> </tbody> </table> |          | 1        | 2        | 3        | 4 | 5 | 1 B  | 0.000000 |  |  |  |  | 2 B | 1.822617 | 0.000000 |  |  |  | 3 B  | 3.056588 | 2.976212 | 0.000000 |  |  | 4 Se | 2.103545 | 2.952755 | 3.899174 | 0.000000 |  | 5 Co | 2.952501 | 2.125095 | 3.386792 | 2.394423 | 0.000000 | 6 Se | 3.485058 | 4.081925 | 2.058887 | 3.323620 | 3.668304 | 7 B | 3.423879 | 3.048563 | 1.847284 | 3.249489 | 2.185288 | 8 B  | 1.836694 | 1.708819 | 4.117156 | 1.929645 | 2.104208 | 9 B | 1.927292 | 2.992675 | 1.873096 | 2.932983 | 3.648449 | 10 B | 1.766194 | 1.751286 | 1.744234 | 3.400590 | 3.177810 | 11 B | 2.830900 | 1.761606 | 1.758018 | 3.540488 | 2.116428 |  | 6 | 7 | 8 | 9 | 10 | 6 Se | 0.000000 |  |  |  |  | 7 B | 2.015873 | 0.000000 |  |  |  | 8 B  | 4.475475 | 3.719350 | 0.000000 |  |  | 9 B | 2.018048 | 2.825264 | 3.520549 | 0.000000 |  | 10 B | 3.164399 | 2.829585 | 3.004217 | 1.707288 | 0.000000 | 11 B | 3.175986 | 1.720545 | 3.100138 | 2.824746 | 1.790113 |
|--------------------------------------------------------------------------------------------------------------------------------|-----------------------------------------------------------------------------------------------------------------------------------------------------------------------------------------------------------------------------------------------------------------------------------------------------------------------------------------------------------------------------------------------------------------------------------------------------------------------------------------------------------------------------------------------------------------------------------------------------------------------------------------------------------------------------------------------------------------------------------------------------------------------------------------------------------------------------------------------------------------------------------------------------------------------------------------------------------------------------------------------------------------------------------------------------------------------------------------------------------------------------------------------------------------------------------------------------------------------------------------------------------------------------------------------------------------------------------------------------------------------------------------------------------------------------------------------------------------------------------------------------------------------------------------------------------------------------------------------------------------------------------------------------------------------------------------------------------------------------------------------------------------------------------------------------------------------------------------------------------------------------------------------------------------------------------------------------------|----------|----------|----------|----------|---|---|------|----------|--|--|--|--|-----|----------|----------|--|--|--|------|----------|----------|----------|--|--|------|----------|----------|----------|----------|--|------|----------|----------|----------|----------|----------|------|----------|----------|----------|----------|----------|-----|----------|----------|----------|----------|----------|------|----------|----------|----------|----------|----------|-----|----------|----------|----------|----------|----------|------|----------|----------|----------|----------|----------|------|----------|----------|----------|----------|----------|--|---|---|---|---|----|------|----------|--|--|--|--|-----|----------|----------|--|--|--|------|----------|----------|----------|--|--|-----|----------|----------|----------|----------|--|------|----------|----------|----------|----------|----------|------|----------|----------|----------|----------|----------|
|                                                                                                                                | 1                                                                                                                                                                                                                                                                                                                                                                                                                                                                                                                                                                                                                                                                                                                                                                                                                                                                                                                                                                                                                                                                                                                                                                                                                                                                                                                                                                                                                                                                                                                                                                                                                                                                                                                                                                                                                                                                                                                                                         | 2        | 3        | 4        | 5        |   |   |      |          |  |  |  |  |     |          |          |  |  |  |      |          |          |          |  |  |      |          |          |          |          |  |      |          |          |          |          |          |      |          |          |          |          |          |     |          |          |          |          |          |      |          |          |          |          |          |     |          |          |          |          |          |      |          |          |          |          |          |      |          |          |          |          |          |  |   |   |   |   |    |      |          |  |  |  |  |     |          |          |  |  |  |      |          |          |          |  |  |     |          |          |          |          |  |      |          |          |          |          |          |      |          |          |          |          |          |
| 1 B                                                                                                                            | 0.000000                                                                                                                                                                                                                                                                                                                                                                                                                                                                                                                                                                                                                                                                                                                                                                                                                                                                                                                                                                                                                                                                                                                                                                                                                                                                                                                                                                                                                                                                                                                                                                                                                                                                                                                                                                                                                                                                                                                                                  |          |          |          |          |   |   |      |          |  |  |  |  |     |          |          |  |  |  |      |          |          |          |  |  |      |          |          |          |          |  |      |          |          |          |          |          |      |          |          |          |          |          |     |          |          |          |          |          |      |          |          |          |          |          |     |          |          |          |          |          |      |          |          |          |          |          |      |          |          |          |          |          |  |   |   |   |   |    |      |          |  |  |  |  |     |          |          |  |  |  |      |          |          |          |  |  |     |          |          |          |          |  |      |          |          |          |          |          |      |          |          |          |          |          |
| 2 B                                                                                                                            | 1.822617                                                                                                                                                                                                                                                                                                                                                                                                                                                                                                                                                                                                                                                                                                                                                                                                                                                                                                                                                                                                                                                                                                                                                                                                                                                                                                                                                                                                                                                                                                                                                                                                                                                                                                                                                                                                                                                                                                                                                  | 0.000000 |          |          |          |   |   |      |          |  |  |  |  |     |          |          |  |  |  |      |          |          |          |  |  |      |          |          |          |          |  |      |          |          |          |          |          |      |          |          |          |          |          |     |          |          |          |          |          |      |          |          |          |          |          |     |          |          |          |          |          |      |          |          |          |          |          |      |          |          |          |          |          |  |   |   |   |   |    |      |          |  |  |  |  |     |          |          |  |  |  |      |          |          |          |  |  |     |          |          |          |          |  |      |          |          |          |          |          |      |          |          |          |          |          |
| 3 B                                                                                                                            | 3.056588                                                                                                                                                                                                                                                                                                                                                                                                                                                                                                                                                                                                                                                                                                                                                                                                                                                                                                                                                                                                                                                                                                                                                                                                                                                                                                                                                                                                                                                                                                                                                                                                                                                                                                                                                                                                                                                                                                                                                  | 2.976212 | 0.000000 |          |          |   |   |      |          |  |  |  |  |     |          |          |  |  |  |      |          |          |          |  |  |      |          |          |          |          |  |      |          |          |          |          |          |      |          |          |          |          |          |     |          |          |          |          |          |      |          |          |          |          |          |     |          |          |          |          |          |      |          |          |          |          |          |      |          |          |          |          |          |  |   |   |   |   |    |      |          |  |  |  |  |     |          |          |  |  |  |      |          |          |          |  |  |     |          |          |          |          |  |      |          |          |          |          |          |      |          |          |          |          |          |
| 4 Se                                                                                                                           | 2.103545                                                                                                                                                                                                                                                                                                                                                                                                                                                                                                                                                                                                                                                                                                                                                                                                                                                                                                                                                                                                                                                                                                                                                                                                                                                                                                                                                                                                                                                                                                                                                                                                                                                                                                                                                                                                                                                                                                                                                  | 2.952755 | 3.899174 | 0.000000 |          |   |   |      |          |  |  |  |  |     |          |          |  |  |  |      |          |          |          |  |  |      |          |          |          |          |  |      |          |          |          |          |          |      |          |          |          |          |          |     |          |          |          |          |          |      |          |          |          |          |          |     |          |          |          |          |          |      |          |          |          |          |          |      |          |          |          |          |          |  |   |   |   |   |    |      |          |  |  |  |  |     |          |          |  |  |  |      |          |          |          |  |  |     |          |          |          |          |  |      |          |          |          |          |          |      |          |          |          |          |          |
| 5 Co                                                                                                                           | 2.952501                                                                                                                                                                                                                                                                                                                                                                                                                                                                                                                                                                                                                                                                                                                                                                                                                                                                                                                                                                                                                                                                                                                                                                                                                                                                                                                                                                                                                                                                                                                                                                                                                                                                                                                                                                                                                                                                                                                                                  | 2.125095 | 3.386792 | 2.394423 | 0.000000 |   |   |      |          |  |  |  |  |     |          |          |  |  |  |      |          |          |          |  |  |      |          |          |          |          |  |      |          |          |          |          |          |      |          |          |          |          |          |     |          |          |          |          |          |      |          |          |          |          |          |     |          |          |          |          |          |      |          |          |          |          |          |      |          |          |          |          |          |  |   |   |   |   |    |      |          |  |  |  |  |     |          |          |  |  |  |      |          |          |          |  |  |     |          |          |          |          |  |      |          |          |          |          |          |      |          |          |          |          |          |
| 6 Se                                                                                                                           | 3.485058                                                                                                                                                                                                                                                                                                                                                                                                                                                                                                                                                                                                                                                                                                                                                                                                                                                                                                                                                                                                                                                                                                                                                                                                                                                                                                                                                                                                                                                                                                                                                                                                                                                                                                                                                                                                                                                                                                                                                  | 4.081925 | 2.058887 | 3.323620 | 3.668304 |   |   |      |          |  |  |  |  |     |          |          |  |  |  |      |          |          |          |  |  |      |          |          |          |          |  |      |          |          |          |          |          |      |          |          |          |          |          |     |          |          |          |          |          |      |          |          |          |          |          |     |          |          |          |          |          |      |          |          |          |          |          |      |          |          |          |          |          |  |   |   |   |   |    |      |          |  |  |  |  |     |          |          |  |  |  |      |          |          |          |  |  |     |          |          |          |          |  |      |          |          |          |          |          |      |          |          |          |          |          |
| 7 B                                                                                                                            | 3.423879                                                                                                                                                                                                                                                                                                                                                                                                                                                                                                                                                                                                                                                                                                                                                                                                                                                                                                                                                                                                                                                                                                                                                                                                                                                                                                                                                                                                                                                                                                                                                                                                                                                                                                                                                                                                                                                                                                                                                  | 3.048563 | 1.847284 | 3.249489 | 2.185288 |   |   |      |          |  |  |  |  |     |          |          |  |  |  |      |          |          |          |  |  |      |          |          |          |          |  |      |          |          |          |          |          |      |          |          |          |          |          |     |          |          |          |          |          |      |          |          |          |          |          |     |          |          |          |          |          |      |          |          |          |          |          |      |          |          |          |          |          |  |   |   |   |   |    |      |          |  |  |  |  |     |          |          |  |  |  |      |          |          |          |  |  |     |          |          |          |          |  |      |          |          |          |          |          |      |          |          |          |          |          |
| 8 B                                                                                                                            | 1.836694                                                                                                                                                                                                                                                                                                                                                                                                                                                                                                                                                                                                                                                                                                                                                                                                                                                                                                                                                                                                                                                                                                                                                                                                                                                                                                                                                                                                                                                                                                                                                                                                                                                                                                                                                                                                                                                                                                                                                  | 1.708819 | 4.117156 | 1.929645 | 2.104208 |   |   |      |          |  |  |  |  |     |          |          |  |  |  |      |          |          |          |  |  |      |          |          |          |          |  |      |          |          |          |          |          |      |          |          |          |          |          |     |          |          |          |          |          |      |          |          |          |          |          |     |          |          |          |          |          |      |          |          |          |          |          |      |          |          |          |          |          |  |   |   |   |   |    |      |          |  |  |  |  |     |          |          |  |  |  |      |          |          |          |  |  |     |          |          |          |          |  |      |          |          |          |          |          |      |          |          |          |          |          |
| 9 B                                                                                                                            | 1.927292                                                                                                                                                                                                                                                                                                                                                                                                                                                                                                                                                                                                                                                                                                                                                                                                                                                                                                                                                                                                                                                                                                                                                                                                                                                                                                                                                                                                                                                                                                                                                                                                                                                                                                                                                                                                                                                                                                                                                  | 2.992675 | 1.873096 | 2.932983 | 3.648449 |   |   |      |          |  |  |  |  |     |          |          |  |  |  |      |          |          |          |  |  |      |          |          |          |          |  |      |          |          |          |          |          |      |          |          |          |          |          |     |          |          |          |          |          |      |          |          |          |          |          |     |          |          |          |          |          |      |          |          |          |          |          |      |          |          |          |          |          |  |   |   |   |   |    |      |          |  |  |  |  |     |          |          |  |  |  |      |          |          |          |  |  |     |          |          |          |          |  |      |          |          |          |          |          |      |          |          |          |          |          |
| 10 B                                                                                                                           | 1.766194                                                                                                                                                                                                                                                                                                                                                                                                                                                                                                                                                                                                                                                                                                                                                                                                                                                                                                                                                                                                                                                                                                                                                                                                                                                                                                                                                                                                                                                                                                                                                                                                                                                                                                                                                                                                                                                                                                                                                  | 1.751286 | 1.744234 | 3.400590 | 3.177810 |   |   |      |          |  |  |  |  |     |          |          |  |  |  |      |          |          |          |  |  |      |          |          |          |          |  |      |          |          |          |          |          |      |          |          |          |          |          |     |          |          |          |          |          |      |          |          |          |          |          |     |          |          |          |          |          |      |          |          |          |          |          |      |          |          |          |          |          |  |   |   |   |   |    |      |          |  |  |  |  |     |          |          |  |  |  |      |          |          |          |  |  |     |          |          |          |          |  |      |          |          |          |          |          |      |          |          |          |          |          |
| 11 B                                                                                                                           | 2.830900                                                                                                                                                                                                                                                                                                                                                                                                                                                                                                                                                                                                                                                                                                                                                                                                                                                                                                                                                                                                                                                                                                                                                                                                                                                                                                                                                                                                                                                                                                                                                                                                                                                                                                                                                                                                                                                                                                                                                  | 1.761606 | 1.758018 | 3.540488 | 2.116428 |   |   |      |          |  |  |  |  |     |          |          |  |  |  |      |          |          |          |  |  |      |          |          |          |          |  |      |          |          |          |          |          |      |          |          |          |          |          |     |          |          |          |          |          |      |          |          |          |          |          |     |          |          |          |          |          |      |          |          |          |          |          |      |          |          |          |          |          |  |   |   |   |   |    |      |          |  |  |  |  |     |          |          |  |  |  |      |          |          |          |  |  |     |          |          |          |          |  |      |          |          |          |          |          |      |          |          |          |          |          |
|                                                                                                                                | 6                                                                                                                                                                                                                                                                                                                                                                                                                                                                                                                                                                                                                                                                                                                                                                                                                                                                                                                                                                                                                                                                                                                                                                                                                                                                                                                                                                                                                                                                                                                                                                                                                                                                                                                                                                                                                                                                                                                                                         | 7        | 8        | 9        | 10       |   |   |      |          |  |  |  |  |     |          |          |  |  |  |      |          |          |          |  |  |      |          |          |          |          |  |      |          |          |          |          |          |      |          |          |          |          |          |     |          |          |          |          |          |      |          |          |          |          |          |     |          |          |          |          |          |      |          |          |          |          |          |      |          |          |          |          |          |  |   |   |   |   |    |      |          |  |  |  |  |     |          |          |  |  |  |      |          |          |          |  |  |     |          |          |          |          |  |      |          |          |          |          |          |      |          |          |          |          |          |
| 6 Se                                                                                                                           | 0.000000                                                                                                                                                                                                                                                                                                                                                                                                                                                                                                                                                                                                                                                                                                                                                                                                                                                                                                                                                                                                                                                                                                                                                                                                                                                                                                                                                                                                                                                                                                                                                                                                                                                                                                                                                                                                                                                                                                                                                  |          |          |          |          |   |   |      |          |  |  |  |  |     |          |          |  |  |  |      |          |          |          |  |  |      |          |          |          |          |  |      |          |          |          |          |          |      |          |          |          |          |          |     |          |          |          |          |          |      |          |          |          |          |          |     |          |          |          |          |          |      |          |          |          |          |          |      |          |          |          |          |          |  |   |   |   |   |    |      |          |  |  |  |  |     |          |          |  |  |  |      |          |          |          |  |  |     |          |          |          |          |  |      |          |          |          |          |          |      |          |          |          |          |          |
| 7 B                                                                                                                            | 2.015873                                                                                                                                                                                                                                                                                                                                                                                                                                                                                                                                                                                                                                                                                                                                                                                                                                                                                                                                                                                                                                                                                                                                                                                                                                                                                                                                                                                                                                                                                                                                                                                                                                                                                                                                                                                                                                                                                                                                                  | 0.000000 |          |          |          |   |   |      |          |  |  |  |  |     |          |          |  |  |  |      |          |          |          |  |  |      |          |          |          |          |  |      |          |          |          |          |          |      |          |          |          |          |          |     |          |          |          |          |          |      |          |          |          |          |          |     |          |          |          |          |          |      |          |          |          |          |          |      |          |          |          |          |          |  |   |   |   |   |    |      |          |  |  |  |  |     |          |          |  |  |  |      |          |          |          |  |  |     |          |          |          |          |  |      |          |          |          |          |          |      |          |          |          |          |          |
| 8 B                                                                                                                            | 4.475475                                                                                                                                                                                                                                                                                                                                                                                                                                                                                                                                                                                                                                                                                                                                                                                                                                                                                                                                                                                                                                                                                                                                                                                                                                                                                                                                                                                                                                                                                                                                                                                                                                                                                                                                                                                                                                                                                                                                                  | 3.719350 | 0.000000 |          |          |   |   |      |          |  |  |  |  |     |          |          |  |  |  |      |          |          |          |  |  |      |          |          |          |          |  |      |          |          |          |          |          |      |          |          |          |          |          |     |          |          |          |          |          |      |          |          |          |          |          |     |          |          |          |          |          |      |          |          |          |          |          |      |          |          |          |          |          |  |   |   |   |   |    |      |          |  |  |  |  |     |          |          |  |  |  |      |          |          |          |  |  |     |          |          |          |          |  |      |          |          |          |          |          |      |          |          |          |          |          |
| 9 B                                                                                                                            | 2.018048                                                                                                                                                                                                                                                                                                                                                                                                                                                                                                                                                                                                                                                                                                                                                                                                                                                                                                                                                                                                                                                                                                                                                                                                                                                                                                                                                                                                                                                                                                                                                                                                                                                                                                                                                                                                                                                                                                                                                  | 2.825264 | 3.520549 | 0.000000 |          |   |   |      |          |  |  |  |  |     |          |          |  |  |  |      |          |          |          |  |  |      |          |          |          |          |  |      |          |          |          |          |          |      |          |          |          |          |          |     |          |          |          |          |          |      |          |          |          |          |          |     |          |          |          |          |          |      |          |          |          |          |          |      |          |          |          |          |          |  |   |   |   |   |    |      |          |  |  |  |  |     |          |          |  |  |  |      |          |          |          |  |  |     |          |          |          |          |  |      |          |          |          |          |          |      |          |          |          |          |          |
| 10 B                                                                                                                           | 3.164399                                                                                                                                                                                                                                                                                                                                                                                                                                                                                                                                                                                                                                                                                                                                                                                                                                                                                                                                                                                                                                                                                                                                                                                                                                                                                                                                                                                                                                                                                                                                                                                                                                                                                                                                                                                                                                                                                                                                                  | 2.829585 | 3.004217 | 1.707288 | 0.000000 |   |   |      |          |  |  |  |  |     |          |          |  |  |  |      |          |          |          |  |  |      |          |          |          |          |  |      |          |          |          |          |          |      |          |          |          |          |          |     |          |          |          |          |          |      |          |          |          |          |          |     |          |          |          |          |          |      |          |          |          |          |          |      |          |          |          |          |          |  |   |   |   |   |    |      |          |  |  |  |  |     |          |          |  |  |  |      |          |          |          |  |  |     |          |          |          |          |  |      |          |          |          |          |          |      |          |          |          |          |          |
| 11 B                                                                                                                           | 3.175986                                                                                                                                                                                                                                                                                                                                                                                                                                                                                                                                                                                                                                                                                                                                                                                                                                                                                                                                                                                                                                                                                                                                                                                                                                                                                                                                                                                                                                                                                                                                                                                                                                                                                                                                                                                                                                                                                                                                                  | 1.720545 | 3.100138 | 2.824746 | 1.790113 |   |   |      |          |  |  |  |  |     |          |          |  |  |  |      |          |          |          |  |  |      |          |          |          |          |  |      |          |          |          |          |          |      |          |          |          |          |          |     |          |          |          |          |          |      |          |          |          |          |          |     |          |          |          |          |          |      |          |          |          |          |          |      |          |          |          |          |          |  |   |   |   |   |    |      |          |  |  |  |  |     |          |          |  |  |  |      |          |          |          |  |  |     |          |          |          |          |  |      |          |          |          |          |          |      |          |          |          |          |          |
|  <p>8. -6582.7890312 +25.2 C<sub>S</sub></p> | <table border="1"> <thead> <tr> <th></th> <th>1</th> <th>2</th> <th>3</th> <th>4</th> <th>5</th> </tr> </thead> <tbody> <tr><td>1 Se</td><td>0.000000</td><td></td><td></td><td></td><td></td></tr> <tr><td>2 B</td><td>3.392659</td><td>0.000000</td><td></td><td></td><td></td></tr> <tr><td>3 Co</td><td>2.315150</td><td>3.449917</td><td>0.000000</td><td></td><td></td></tr> <tr><td>4 B</td><td>3.392604</td><td>2.578523</td><td>3.449880</td><td>0.000000</td><td></td></tr> <tr><td>5 B</td><td>4.431703</td><td>1.886054</td><td>4.524328</td><td>1.886079</td><td>0.000000</td></tr> <tr><td>6 B</td><td>3.188282</td><td>2.785816</td><td>2.065241</td><td>1.786289</td><td>2.991938</td></tr> <tr><td>7 B</td><td>4.098555</td><td>1.852599</td><td>3.367958</td><td>1.852635</td><td>1.659265</td></tr> <tr><td>8 Se</td><td>3.240191</td><td>2.107545</td><td>4.304686</td><td>2.107552</td><td>1.924855</td></tr> <tr><td>9 B</td><td>2.003383</td><td>3.328406</td><td>2.135233</td><td>1.965161</td><td>3.617346</td></tr> <tr><td>10 B</td><td>2.003439</td><td>1.965104</td><td>2.135254</td><td>3.328294</td><td>3.617246</td></tr> <tr><td>11 B</td><td>3.188308</td><td>1.786313</td><td>2.065252</td><td>2.785769</td><td>2.991914</td></tr> <tr> <th></th> <th>6</th> <th>7</th> <th>8</th> <th>9</th> <th>10</th> </tr> <tr><td>6 B</td><td>0.000000</td><td></td><td></td><td></td><td></td></tr> <tr><td>7 B</td><td>1.750076</td><td>0.000000</td><td></td><td></td><td></td></tr> <tr><td>8 Se</td><td>3.405538</td><td>2.918187</td><td>0.000000</td><td></td><td></td></tr> <tr><td>9 B</td><td>1.722247</td><td>3.050479</td><td>3.068754</td><td>0.000000</td><td></td></tr> <tr><td>10 B</td><td>2.815259</td><td>3.050369</td><td>3.068666</td><td>2.798566</td><td>0.000000</td></tr> <tr><td>11 B</td><td>1.772242</td><td>1.750019</td><td>3.405527</td><td>2.815306</td><td>1.722215</td></tr> </tbody> </table> |          | 1        | 2        | 3        | 4 | 5 | 1 Se | 0.000000 |  |  |  |  | 2 B | 3.392659 | 0.000000 |  |  |  | 3 Co | 2.315150 | 3.449917 | 0.000000 |  |  | 4 B  | 3.392604 | 2.578523 | 3.449880 | 0.000000 |  | 5 B  | 4.431703 | 1.886054 | 4.524328 | 1.886079 | 0.000000 | 6 B  | 3.188282 | 2.785816 | 2.065241 | 1.786289 | 2.991938 | 7 B | 4.098555 | 1.852599 | 3.367958 | 1.852635 | 1.659265 | 8 Se | 3.240191 | 2.107545 | 4.304686 | 2.107552 | 1.924855 | 9 B | 2.003383 | 3.328406 | 2.135233 | 1.965161 | 3.617346 | 10 B | 2.003439 | 1.965104 | 2.135254 | 3.328294 | 3.617246 | 11 B | 3.188308 | 1.786313 | 2.065252 | 2.785769 | 2.991914 |  | 6 | 7 | 8 | 9 | 10 | 6 B  | 0.000000 |  |  |  |  | 7 B | 1.750076 | 0.000000 |  |  |  | 8 Se | 3.405538 | 2.918187 | 0.000000 |  |  | 9 B | 1.722247 | 3.050479 | 3.068754 | 0.000000 |  | 10 B | 2.815259 | 3.050369 | 3.068666 | 2.798566 | 0.000000 | 11 B | 1.772242 | 1.750019 | 3.405527 | 2.815306 | 1.722215 |
|                                                                                                                                | 1                                                                                                                                                                                                                                                                                                                                                                                                                                                                                                                                                                                                                                                                                                                                                                                                                                                                                                                                                                                                                                                                                                                                                                                                                                                                                                                                                                                                                                                                                                                                                                                                                                                                                                                                                                                                                                                                                                                                                         | 2        | 3        | 4        | 5        |   |   |      |          |  |  |  |  |     |          |          |  |  |  |      |          |          |          |  |  |      |          |          |          |          |  |      |          |          |          |          |          |      |          |          |          |          |          |     |          |          |          |          |          |      |          |          |          |          |          |     |          |          |          |          |          |      |          |          |          |          |          |      |          |          |          |          |          |  |   |   |   |   |    |      |          |  |  |  |  |     |          |          |  |  |  |      |          |          |          |  |  |     |          |          |          |          |  |      |          |          |          |          |          |      |          |          |          |          |          |
| 1 Se                                                                                                                           | 0.000000                                                                                                                                                                                                                                                                                                                                                                                                                                                                                                                                                                                                                                                                                                                                                                                                                                                                                                                                                                                                                                                                                                                                                                                                                                                                                                                                                                                                                                                                                                                                                                                                                                                                                                                                                                                                                                                                                                                                                  |          |          |          |          |   |   |      |          |  |  |  |  |     |          |          |  |  |  |      |          |          |          |  |  |      |          |          |          |          |  |      |          |          |          |          |          |      |          |          |          |          |          |     |          |          |          |          |          |      |          |          |          |          |          |     |          |          |          |          |          |      |          |          |          |          |          |      |          |          |          |          |          |  |   |   |   |   |    |      |          |  |  |  |  |     |          |          |  |  |  |      |          |          |          |  |  |     |          |          |          |          |  |      |          |          |          |          |          |      |          |          |          |          |          |
| 2 B                                                                                                                            | 3.392659                                                                                                                                                                                                                                                                                                                                                                                                                                                                                                                                                                                                                                                                                                                                                                                                                                                                                                                                                                                                                                                                                                                                                                                                                                                                                                                                                                                                                                                                                                                                                                                                                                                                                                                                                                                                                                                                                                                                                  | 0.000000 |          |          |          |   |   |      |          |  |  |  |  |     |          |          |  |  |  |      |          |          |          |  |  |      |          |          |          |          |  |      |          |          |          |          |          |      |          |          |          |          |          |     |          |          |          |          |          |      |          |          |          |          |          |     |          |          |          |          |          |      |          |          |          |          |          |      |          |          |          |          |          |  |   |   |   |   |    |      |          |  |  |  |  |     |          |          |  |  |  |      |          |          |          |  |  |     |          |          |          |          |  |      |          |          |          |          |          |      |          |          |          |          |          |
| 3 Co                                                                                                                           | 2.315150                                                                                                                                                                                                                                                                                                                                                                                                                                                                                                                                                                                                                                                                                                                                                                                                                                                                                                                                                                                                                                                                                                                                                                                                                                                                                                                                                                                                                                                                                                                                                                                                                                                                                                                                                                                                                                                                                                                                                  | 3.449917 | 0.000000 |          |          |   |   |      |          |  |  |  |  |     |          |          |  |  |  |      |          |          |          |  |  |      |          |          |          |          |  |      |          |          |          |          |          |      |          |          |          |          |          |     |          |          |          |          |          |      |          |          |          |          |          |     |          |          |          |          |          |      |          |          |          |          |          |      |          |          |          |          |          |  |   |   |   |   |    |      |          |  |  |  |  |     |          |          |  |  |  |      |          |          |          |  |  |     |          |          |          |          |  |      |          |          |          |          |          |      |          |          |          |          |          |
| 4 B                                                                                                                            | 3.392604                                                                                                                                                                                                                                                                                                                                                                                                                                                                                                                                                                                                                                                                                                                                                                                                                                                                                                                                                                                                                                                                                                                                                                                                                                                                                                                                                                                                                                                                                                                                                                                                                                                                                                                                                                                                                                                                                                                                                  | 2.578523 | 3.449880 | 0.000000 |          |   |   |      |          |  |  |  |  |     |          |          |  |  |  |      |          |          |          |  |  |      |          |          |          |          |  |      |          |          |          |          |          |      |          |          |          |          |          |     |          |          |          |          |          |      |          |          |          |          |          |     |          |          |          |          |          |      |          |          |          |          |          |      |          |          |          |          |          |  |   |   |   |   |    |      |          |  |  |  |  |     |          |          |  |  |  |      |          |          |          |  |  |     |          |          |          |          |  |      |          |          |          |          |          |      |          |          |          |          |          |
| 5 B                                                                                                                            | 4.431703                                                                                                                                                                                                                                                                                                                                                                                                                                                                                                                                                                                                                                                                                                                                                                                                                                                                                                                                                                                                                                                                                                                                                                                                                                                                                                                                                                                                                                                                                                                                                                                                                                                                                                                                                                                                                                                                                                                                                  | 1.886054 | 4.524328 | 1.886079 | 0.000000 |   |   |      |          |  |  |  |  |     |          |          |  |  |  |      |          |          |          |  |  |      |          |          |          |          |  |      |          |          |          |          |          |      |          |          |          |          |          |     |          |          |          |          |          |      |          |          |          |          |          |     |          |          |          |          |          |      |          |          |          |          |          |      |          |          |          |          |          |  |   |   |   |   |    |      |          |  |  |  |  |     |          |          |  |  |  |      |          |          |          |  |  |     |          |          |          |          |  |      |          |          |          |          |          |      |          |          |          |          |          |
| 6 B                                                                                                                            | 3.188282                                                                                                                                                                                                                                                                                                                                                                                                                                                                                                                                                                                                                                                                                                                                                                                                                                                                                                                                                                                                                                                                                                                                                                                                                                                                                                                                                                                                                                                                                                                                                                                                                                                                                                                                                                                                                                                                                                                                                  | 2.785816 | 2.065241 | 1.786289 | 2.991938 |   |   |      |          |  |  |  |  |     |          |          |  |  |  |      |          |          |          |  |  |      |          |          |          |          |  |      |          |          |          |          |          |      |          |          |          |          |          |     |          |          |          |          |          |      |          |          |          |          |          |     |          |          |          |          |          |      |          |          |          |          |          |      |          |          |          |          |          |  |   |   |   |   |    |      |          |  |  |  |  |     |          |          |  |  |  |      |          |          |          |  |  |     |          |          |          |          |  |      |          |          |          |          |          |      |          |          |          |          |          |
| 7 B                                                                                                                            | 4.098555                                                                                                                                                                                                                                                                                                                                                                                                                                                                                                                                                                                                                                                                                                                                                                                                                                                                                                                                                                                                                                                                                                                                                                                                                                                                                                                                                                                                                                                                                                                                                                                                                                                                                                                                                                                                                                                                                                                                                  | 1.852599 | 3.367958 | 1.852635 | 1.659265 |   |   |      |          |  |  |  |  |     |          |          |  |  |  |      |          |          |          |  |  |      |          |          |          |          |  |      |          |          |          |          |          |      |          |          |          |          |          |     |          |          |          |          |          |      |          |          |          |          |          |     |          |          |          |          |          |      |          |          |          |          |          |      |          |          |          |          |          |  |   |   |   |   |    |      |          |  |  |  |  |     |          |          |  |  |  |      |          |          |          |  |  |     |          |          |          |          |  |      |          |          |          |          |          |      |          |          |          |          |          |
| 8 Se                                                                                                                           | 3.240191                                                                                                                                                                                                                                                                                                                                                                                                                                                                                                                                                                                                                                                                                                                                                                                                                                                                                                                                                                                                                                                                                                                                                                                                                                                                                                                                                                                                                                                                                                                                                                                                                                                                                                                                                                                                                                                                                                                                                  | 2.107545 | 4.304686 | 2.107552 | 1.924855 |   |   |      |          |  |  |  |  |     |          |          |  |  |  |      |          |          |          |  |  |      |          |          |          |          |  |      |          |          |          |          |          |      |          |          |          |          |          |     |          |          |          |          |          |      |          |          |          |          |          |     |          |          |          |          |          |      |          |          |          |          |          |      |          |          |          |          |          |  |   |   |   |   |    |      |          |  |  |  |  |     |          |          |  |  |  |      |          |          |          |  |  |     |          |          |          |          |  |      |          |          |          |          |          |      |          |          |          |          |          |
| 9 B                                                                                                                            | 2.003383                                                                                                                                                                                                                                                                                                                                                                                                                                                                                                                                                                                                                                                                                                                                                                                                                                                                                                                                                                                                                                                                                                                                                                                                                                                                                                                                                                                                                                                                                                                                                                                                                                                                                                                                                                                                                                                                                                                                                  | 3.328406 | 2.135233 | 1.965161 | 3.617346 |   |   |      |          |  |  |  |  |     |          |          |  |  |  |      |          |          |          |  |  |      |          |          |          |          |  |      |          |          |          |          |          |      |          |          |          |          |          |     |          |          |          |          |          |      |          |          |          |          |          |     |          |          |          |          |          |      |          |          |          |          |          |      |          |          |          |          |          |  |   |   |   |   |    |      |          |  |  |  |  |     |          |          |  |  |  |      |          |          |          |  |  |     |          |          |          |          |  |      |          |          |          |          |          |      |          |          |          |          |          |
| 10 B                                                                                                                           | 2.003439                                                                                                                                                                                                                                                                                                                                                                                                                                                                                                                                                                                                                                                                                                                                                                                                                                                                                                                                                                                                                                                                                                                                                                                                                                                                                                                                                                                                                                                                                                                                                                                                                                                                                                                                                                                                                                                                                                                                                  | 1.965104 | 2.135254 | 3.328294 | 3.617246 |   |   |      |          |  |  |  |  |     |          |          |  |  |  |      |          |          |          |  |  |      |          |          |          |          |  |      |          |          |          |          |          |      |          |          |          |          |          |     |          |          |          |          |          |      |          |          |          |          |          |     |          |          |          |          |          |      |          |          |          |          |          |      |          |          |          |          |          |  |   |   |   |   |    |      |          |  |  |  |  |     |          |          |  |  |  |      |          |          |          |  |  |     |          |          |          |          |  |      |          |          |          |          |          |      |          |          |          |          |          |
| 11 B                                                                                                                           | 3.188308                                                                                                                                                                                                                                                                                                                                                                                                                                                                                                                                                                                                                                                                                                                                                                                                                                                                                                                                                                                                                                                                                                                                                                                                                                                                                                                                                                                                                                                                                                                                                                                                                                                                                                                                                                                                                                                                                                                                                  | 1.786313 | 2.065252 | 2.785769 | 2.991914 |   |   |      |          |  |  |  |  |     |          |          |  |  |  |      |          |          |          |  |  |      |          |          |          |          |  |      |          |          |          |          |          |      |          |          |          |          |          |     |          |          |          |          |          |      |          |          |          |          |          |     |          |          |          |          |          |      |          |          |          |          |          |      |          |          |          |          |          |  |   |   |   |   |    |      |          |  |  |  |  |     |          |          |  |  |  |      |          |          |          |  |  |     |          |          |          |          |  |      |          |          |          |          |          |      |          |          |          |          |          |
|                                                                                                                                | 6                                                                                                                                                                                                                                                                                                                                                                                                                                                                                                                                                                                                                                                                                                                                                                                                                                                                                                                                                                                                                                                                                                                                                                                                                                                                                                                                                                                                                                                                                                                                                                                                                                                                                                                                                                                                                                                                                                                                                         | 7        | 8        | 9        | 10       |   |   |      |          |  |  |  |  |     |          |          |  |  |  |      |          |          |          |  |  |      |          |          |          |          |  |      |          |          |          |          |          |      |          |          |          |          |          |     |          |          |          |          |          |      |          |          |          |          |          |     |          |          |          |          |          |      |          |          |          |          |          |      |          |          |          |          |          |  |   |   |   |   |    |      |          |  |  |  |  |     |          |          |  |  |  |      |          |          |          |  |  |     |          |          |          |          |  |      |          |          |          |          |          |      |          |          |          |          |          |
| 6 B                                                                                                                            | 0.000000                                                                                                                                                                                                                                                                                                                                                                                                                                                                                                                                                                                                                                                                                                                                                                                                                                                                                                                                                                                                                                                                                                                                                                                                                                                                                                                                                                                                                                                                                                                                                                                                                                                                                                                                                                                                                                                                                                                                                  |          |          |          |          |   |   |      |          |  |  |  |  |     |          |          |  |  |  |      |          |          |          |  |  |      |          |          |          |          |  |      |          |          |          |          |          |      |          |          |          |          |          |     |          |          |          |          |          |      |          |          |          |          |          |     |          |          |          |          |          |      |          |          |          |          |          |      |          |          |          |          |          |  |   |   |   |   |    |      |          |  |  |  |  |     |          |          |  |  |  |      |          |          |          |  |  |     |          |          |          |          |  |      |          |          |          |          |          |      |          |          |          |          |          |
| 7 B                                                                                                                            | 1.750076                                                                                                                                                                                                                                                                                                                                                                                                                                                                                                                                                                                                                                                                                                                                                                                                                                                                                                                                                                                                                                                                                                                                                                                                                                                                                                                                                                                                                                                                                                                                                                                                                                                                                                                                                                                                                                                                                                                                                  | 0.000000 |          |          |          |   |   |      |          |  |  |  |  |     |          |          |  |  |  |      |          |          |          |  |  |      |          |          |          |          |  |      |          |          |          |          |          |      |          |          |          |          |          |     |          |          |          |          |          |      |          |          |          |          |          |     |          |          |          |          |          |      |          |          |          |          |          |      |          |          |          |          |          |  |   |   |   |   |    |      |          |  |  |  |  |     |          |          |  |  |  |      |          |          |          |  |  |     |          |          |          |          |  |      |          |          |          |          |          |      |          |          |          |          |          |
| 8 Se                                                                                                                           | 3.405538                                                                                                                                                                                                                                                                                                                                                                                                                                                                                                                                                                                                                                                                                                                                                                                                                                                                                                                                                                                                                                                                                                                                                                                                                                                                                                                                                                                                                                                                                                                                                                                                                                                                                                                                                                                                                                                                                                                                                  | 2.918187 | 0.000000 |          |          |   |   |      |          |  |  |  |  |     |          |          |  |  |  |      |          |          |          |  |  |      |          |          |          |          |  |      |          |          |          |          |          |      |          |          |          |          |          |     |          |          |          |          |          |      |          |          |          |          |          |     |          |          |          |          |          |      |          |          |          |          |          |      |          |          |          |          |          |  |   |   |   |   |    |      |          |  |  |  |  |     |          |          |  |  |  |      |          |          |          |  |  |     |          |          |          |          |  |      |          |          |          |          |          |      |          |          |          |          |          |
| 9 B                                                                                                                            | 1.722247                                                                                                                                                                                                                                                                                                                                                                                                                                                                                                                                                                                                                                                                                                                                                                                                                                                                                                                                                                                                                                                                                                                                                                                                                                                                                                                                                                                                                                                                                                                                                                                                                                                                                                                                                                                                                                                                                                                                                  | 3.050479 | 3.068754 | 0.000000 |          |   |   |      |          |  |  |  |  |     |          |          |  |  |  |      |          |          |          |  |  |      |          |          |          |          |  |      |          |          |          |          |          |      |          |          |          |          |          |     |          |          |          |          |          |      |          |          |          |          |          |     |          |          |          |          |          |      |          |          |          |          |          |      |          |          |          |          |          |  |   |   |   |   |    |      |          |  |  |  |  |     |          |          |  |  |  |      |          |          |          |  |  |     |          |          |          |          |  |      |          |          |          |          |          |      |          |          |          |          |          |
| 10 B                                                                                                                           | 2.815259                                                                                                                                                                                                                                                                                                                                                                                                                                                                                                                                                                                                                                                                                                                                                                                                                                                                                                                                                                                                                                                                                                                                                                                                                                                                                                                                                                                                                                                                                                                                                                                                                                                                                                                                                                                                                                                                                                                                                  | 3.050369 | 3.068666 | 2.798566 | 0.000000 |   |   |      |          |  |  |  |  |     |          |          |  |  |  |      |          |          |          |  |  |      |          |          |          |          |  |      |          |          |          |          |          |      |          |          |          |          |          |     |          |          |          |          |          |      |          |          |          |          |          |     |          |          |          |          |          |      |          |          |          |          |          |      |          |          |          |          |          |  |   |   |   |   |    |      |          |  |  |  |  |     |          |          |  |  |  |      |          |          |          |  |  |     |          |          |          |          |  |      |          |          |          |          |          |      |          |          |          |          |          |
| 11 B                                                                                                                           | 1.772242                                                                                                                                                                                                                                                                                                                                                                                                                                                                                                                                                                                                                                                                                                                                                                                                                                                                                                                                                                                                                                                                                                                                                                                                                                                                                                                                                                                                                                                                                                                                                                                                                                                                                                                                                                                                                                                                                                                                                  | 1.750019 | 3.405527 | 2.815306 | 1.722215 |   |   |      |          |  |  |  |  |     |          |          |  |  |  |      |          |          |          |  |  |      |          |          |          |          |  |      |          |          |          |          |          |      |          |          |          |          |          |     |          |          |          |          |          |      |          |          |          |          |          |     |          |          |          |          |          |      |          |          |          |          |          |      |          |          |          |          |          |  |   |   |   |   |    |      |          |  |  |  |  |     |          |          |  |  |  |      |          |          |          |  |  |     |          |          |          |          |  |      |          |          |          |          |          |      |          |          |          |          |          |

Table S4C. Energy ranking for all of the CpCoSe<sub>2</sub>B<sub>8</sub>H<sub>8</sub> optimized structures after B3LYP/6-31G(d) optimizations:

| No | Initial structure          | Final energy (a.u.) | $\Delta E$<br>(kcal/mol) |
|----|----------------------------|---------------------|--------------------------|
| 1  | 3-TricapCubeB-Co3Se2Se7    | -6578.6152600       | 0.00                     |
| 2  | 2-TricapCubeA-Co1Se1Se5    | -6578.6152533       | 0.00                     |
| 3  | 4-Icos-1vx-Co5Se1Se7       | -6578.6151960       | 0.04                     |
| 4  | 4-Icos-1vx-Co3Se1Se1       | -6578.6151798       | 0.05                     |
| 5  | 1-PentaCapTriPri-Co1Se1Se2 | -6578.6151728       | 0.05                     |
| 6  | 4-Icos-1vx-Co3Se1Se5       | -6578.6151643       | 0.06                     |
| 7  | 3-TricapCubeB-Co2Se1Se7    | -6578.6151616       | 0.06                     |
| 8  | 2-TricapCubeA-Co3Se7Se1    | -6578.6151585       | 0.06                     |
| 9  | 4-Icos-1vx-Co2Se1Se4       | -6578.6151344       | 0.08                     |
| 10 | 3-TricapCubeB-Co3Se4Se1    | -6578.6018117       | 8.44                     |
| 11 | 4-Icos-1vx-Co3Se1Se2       | -6578.6017671       | 8.47                     |
| 12 | 3-TricapCubeB-Co3Se2Se3    | -6578.6017631       | 8.47                     |
| 13 | 2-TricapCubeA-Co3Se3Se3    | -6578.6017628       | 8.47                     |
| 14 | 3-TricapCubeB-Co2Se3Se1    | -6578.6017588       | 8.47                     |
| 15 | 4-Icos-1vx-Co2Se2Se3       | -6578.6017474       | 8.48                     |
| 16 | 4-Icos-1vx-Co2Se1Se2       | -6578.6017446       | 8.48                     |
| 17 | 2-TricapCubeA-Co4Se2Se1    | -6578.6017350       | 8.49                     |
| 18 | 2-TricapCubeA-Co3Se4Se3    | -6578.6017267       | 8.49                     |
| 19 | 3-TricapCubeB-Co1Se1Se2    | -6578.6017245       | 8.49                     |
| 20 | 4-Icos-1vx-Co1Se1Se5       | -6578.6017217       | 8.50                     |
| 21 | 4-Icos-1vx-Co3Se1Se4       | -6578.6017209       | 8.50                     |
| 22 | 4-Icos-1vx-Co2Se1Se5       | -6578.6017181       | 8.50                     |
| 23 | 2-TricapCubeA-Co3Se9Se1    | -6578.6017172       | 8.50                     |
| 24 | 1-PentaCapTriPri-Co1Se1Se8 | -6578.6017151       | 8.50                     |
| 25 | 4-Icos-1vx-Co4Se3Se3       | -6578.6017102       | 8.50                     |
| 26 | 2-TricapCubeA-Co4Se3Se2    | -6578.6017076       | 8.50                     |
| 27 | 3-TricapCubeB-Co2Se1Se3    | -6578.6016959       | 8.51                     |
| 28 | 4-Icos-1vx-Co1Se3Se7       | -6578.6016955       | 8.51                     |
| 29 | 2-TricapCubeA-Co2Se1Se5    | -6578.6016943       | 8.51                     |
| 30 | 2-TricapCubeA-Co2Se2Se4    | -6578.6016936       | 8.51                     |
| 31 | 3-TricapCubeB-Co2Se5Se1    | -6578.5968817       | 11.53                    |
| 32 | 2-TricapCubeA-Co3Se7Se2    | -6578.5968776       | 11.54                    |
| 33 | 4-Icos-1vx-Co5Se3Se4       | -6578.5968729       | 11.54                    |
| 34 | 2-TricapCubeA-Co3Se2Se4    | -6578.5968692       | 11.54                    |
| 35 | 3-TricapCubeB-Co4Se1Se4    | -6578.5968596       | 11.55                    |
| 36 | 2-TricapCubeA-Co1Se2Se3    | -6578.5968567       | 11.55                    |
| 37 | 4-Icos-1vx-Co5Se1Se9       | -6578.5968508       | 11.55                    |
| 38 | 2-TricapCubeA-Co2Se4Se2    | -6578.5968480       | 11.55                    |
| 39 | 4-Icos-1vx-Co4Se1Se4       | -6578.5968478       | 11.55                    |

|    |                            |               |       |
|----|----------------------------|---------------|-------|
| 40 | 3-TricapCubeB-Co1Se2Se1    | -6578.5968468 | 11.55 |
| 41 | 4-Icos-1vx-Co5Se4Se4       | -6578.5968459 | 11.56 |
| 42 | 4-Icos-1vx-Co5Se2Se7       | -6578.5968415 | 11.56 |
| 43 | 2-TricapCubeA-Co2Se1Se7    | -6578.5968301 | 11.57 |
| 44 | 3-TricapCubeB-Co4Se2Se3    | -6578.5968283 | 11.57 |
| 45 | 1-PentaCapTriPri-Co1Se1Se5 | -6578.5968133 | 11.58 |
| 46 | 2-TricapCubeA-Co4Se5Se2    | -6578.5968088 | 11.58 |
| 47 | 2-TricapCubeA-Co2Se2Se3    | -6578.5968078 | 11.58 |
| 48 | 2-TricapCubeA-Co1Se2Se1    | -6578.5968011 | 11.58 |
| 49 | 4-Icos-1vx-Co3Se5Se5       | -6578.5967930 | 11.59 |
| 50 | 2-TricapCubeA-Co4Se2Se2    | -6578.5967928 | 11.59 |
| 51 | 2-TricapCubeA-Co2Se1Se3    | -6578.5967918 | 11.59 |
| 52 | 2-TricapCubeA-Co1Se3Se4    | -6578.5967898 | 11.59 |
| 53 | 2-TricapCubeA-Co1Se2Se2    | -6578.5967751 | 11.60 |
| 54 | 4-Icos-1vx-Co2Se2Se1       | -6578.5967743 | 11.60 |
| 55 | 3-TricapCubeB-Co1Se2Se6    | -6578.5967624 | 11.61 |
| 56 | 2-TricapCubeA-Co1Se1Se9    | -6578.5967563 | 11.61 |
| 57 | 4-Icos-1vx-Co4Se2Se2       | -6578.5967554 | 11.61 |
| 58 | 3-TricapCubeB-Co4Se2Se7    | -6578.5967476 | 11.62 |
| 59 | 2-TricapCubeA-Co2Se1Se9    | -6578.5962402 | 11.94 |
| 60 | 3-TricapCubeB-Co1Se1Se4    | -6578.5962331 | 11.94 |
| 61 | 3-TricapCubeB-Co1Se4Se3    | -6578.5962059 | 11.96 |
| 62 | 4-Icos-1vx-Co5Se1Se4       | -6578.5962057 | 11.96 |
| 63 | 4-Icos-1vx-Co4Se1Se6       | -6578.5962029 | 11.96 |
| 64 | 3-TricapCubeB-Co3Se5Se2    | -6578.5961938 | 11.96 |
| 65 | 3-TricapCubeB-Co3Se3Se3    | -6578.5961861 | 11.97 |
| 66 | 3-TricapCubeB-Co4Se1Se2    | -6578.5961846 | 11.97 |
| 67 | 2-TricapCubeA-Co4Se6Se2    | -6578.5961793 | 11.97 |
| 68 | 3-TricapCubeB-Co4Se5Se2    | -6578.5961783 | 11.97 |
| 69 | 4-Icos-1vx-Co2Se1Se6       | -6578.5961759 | 11.98 |
| 70 | 2-TricapCubeA-Co4Se6Se4    | -6578.5961739 | 11.98 |
| 71 | 3-TricapCubeB-Co2Se5Se2    | -6578.5961724 | 11.98 |
| 72 | 2-TricapCubeA-Co2Se3Se7    | -6578.5961682 | 11.98 |
| 73 | 2-TricapCubeA-Co1Se1Se3    | -6578.5961615 | 11.98 |
| 74 | 2-TricapCubeA-Co4Se4Se4    | -6578.5961599 | 11.99 |
| 75 | 2-TricapCubeA-Co4Se1Se7    | -6578.5961585 | 11.99 |
| 76 | 4-Icos-1vx-Co3Se7Se2       | -6578.5961570 | 11.99 |
| 77 | 4-Icos-1vx-Co1Se3Se4       | -6578.5961551 | 11.99 |
| 78 | 4-Icos-1vx-Co5Se4Se2       | -6578.5961545 | 11.99 |
| 79 | 2-TricapCubeA-Co2Se4Se3    | -6578.5961502 | 11.99 |
| 80 | 2-TricapCubeA-Co1Se1Se8    | -6578.5961496 | 11.99 |
| 81 | 2-TricapCubeA-Co3Se4Se5    | -6578.5961489 | 11.99 |
| 82 | 2-TricapCubeA-Co4Se2Se6    | -6578.5961478 | 11.99 |

|     |                              |               |       |
|-----|------------------------------|---------------|-------|
| 83  | 3-TricapCubeB-Co2Se1Se6      | -6578.5961446 | 12.00 |
| 84  | 4-Icos-1vx-Co3Se5Se4         | -6578.5961418 | 12.00 |
| 85  | 2-TricapCubeA-Co3Se2Se2      | -6578.5961414 | 12.00 |
| 86  | 3-TricapCubeB-Co1Se3Se3      | -6578.5961414 | 12.00 |
| 87  | 3-TricapCubeB-Co3Se2Se1      | -6578.5961383 | 12.00 |
| 88  | 4-Icos-1vx-Co4Se2Se5         | -6578.5961342 | 12.00 |
| 89  | 2-TricapCubeA-Co3Se6Se2      | -6578.5961283 | 12.01 |
| 90  | 2-TricapCubeA-Co4Se8Se1      | -6578.5961269 | 12.01 |
| 91  | 4-Icos-1vx-Co2Se2Se5         | -6578.5961149 | 12.01 |
| 92  | 4-Icos-1vx-Co3Se9Se1         | -6578.5961148 | 12.01 |
| 93  | 2-TricapCubeA-Co3Se6Se4      | -6578.5961082 | 12.02 |
| 94  | 2-TricapCubeA-Co1Se3Se7      | -6578.5960983 | 12.02 |
| 95  | 3-TricapCubeB-Co4Se6Se1      | -6578.5960968 | 12.03 |
| 96  | 4-Icos-1vx-Co3Se6Se3         | -6578.5960950 | 12.03 |
| 97  | 2-TricapCubeA-Co3Se1Se6      | -6578.5826795 | 20.44 |
| 98  | 2-TricapCubeA-Co4Se7Se1      | -6578.5826725 | 20.45 |
| 99  | 4-Icos-1vx-Co3Se3Se7         | -6578.5826600 | 20.46 |
| 100 | 2-TricapCubeA-Co3Se5Se3      | -6578.5826582 | 20.46 |
| 101 | 4-Icos-1vx-Co5Se4Se6         | -6578.5826582 | 20.46 |
| 102 | 4-Icos-1vx-Co5Se4Se1         | -6578.5826567 | 20.46 |
| 103 | 4-Icos-1vx-Co5Se3Se7         | -6578.5826469 | 20.47 |
| 104 | 2-TricapCubeA-Co4Se8Se2      | -6578.5826276 | 20.48 |
| 105 | 3-TricapCubeB-Co3Se3Se7      | -6578.5826096 | 20.49 |
| 106 | 3-TricapCubeB-Co4Se1Se6      | -6578.5826016 | 20.49 |
| 107 | 1-PentaCapTriPri-Co1Se3Se2   | -6578.5825730 | 20.51 |
| 108 | 4-Icos-1vx-Co3Se8Se1         | -6578.5825724 | 20.51 |
| 109 | 2-TricapCubeA-Co1Se3Se1      | -6578.5825679 | 20.51 |
| 110 | 2-TricapCubeA-Co4Se7Se3      | -6578.5722247 | 27.01 |
| 111 | 4-Icos-1vx-Co3Se8Se2         | -6578.5721897 | 27.03 |
| 112 | 3-TricapCubeB-Co2Se2Se8      | -6578.5721831 | 27.03 |
| 113 | 1-PentaCapTriPri-Co2Se5Se1   | -6578.5721712 | 27.04 |
| 114 | 3-TricapCubeB-Co2Se2Se4      | -6578.5721665 | 27.04 |
| 115 | 4-Icos-1vx-Co4Se2Se3         | -6578.5721642 | 27.04 |
| 116 | 2-TricapCubeA-Co3Se2Se5_r-17 | -6578.5721616 | 27.05 |
| 117 | 2-TricapCubeA-Co4Se5Se4      | -6578.5721601 | 27.05 |
| 118 | 2-TricapCubeA-Co3Se2Se5_i-17 | -6578.5721539 | 27.05 |
| 119 | 2-TricapCubeA-Co3Se2Se1      | -6578.5721538 | 27.05 |
| 120 | 2-TricapCubeA-Co2Se4Se1      | -6578.5721453 | 27.06 |
| 121 | 1-PentaCapTriPri-Co2Se4Se2   | -6578.5721417 | 27.06 |
| 122 | 4-Icos-1vx-Co3Se4Se6         | -6578.5721366 | 27.06 |
| 123 | 3-TricapCubeB-Co4Se1Se1      | -6578.5712398 | 27.62 |
| 124 | 3-TricapCubeB-Co1Se3Se2      | -6578.5712282 | 27.63 |
| 125 | 4-Icos-1vx-Co4Se1Se1         | -6578.5712252 | 27.63 |

|     |                            |               |       |
|-----|----------------------------|---------------|-------|
| 126 | 3-TricapCubeB-Co3Se1Se1    | -6578.5712221 | 27.63 |
| 127 | 2-TricapCubeA-Co4Se6Se1    | -6578.5712065 | 27.64 |
| 128 | 4-Icos-1vx-Co1Se3Se5       | -6578.5711991 | 27.65 |
| 129 | 3-TricapCubeB-Co1Se1Se3    | -6578.5711769 | 27.66 |
| 130 | 2-TricapCubeA-Co4Se1Se2    | -6578.5711694 | 27.67 |
| 131 | 1-PentaCapTriPri-Co2Se3Se3 | -6578.5711339 | 27.69 |
| 132 | 3-TricapCubeB-Co4Se2Se4    | -6578.5711311 | 27.69 |
| 133 | 2-TricapCubeA-Co3Se4Se6    | -6578.5711248 | 27.70 |
| 134 | 4-Icos-1vx-Co3Se4Se1       | -6578.5711095 | 27.71 |
| 135 | 3-TricapCubeB-Co1Se5Se1    | -6578.5646360 | 31.77 |
| 136 | 4-Icos-1vx-Co4Se4Se1       | -6578.5646337 | 31.77 |
| 137 | 1-PentaCapTriPri-Co2Se1Se3 | -6578.5646190 | 31.78 |
| 138 | 2-TricapCubeA-Co2Se1Se8    | -6578.5646093 | 31.78 |
| 139 | 3-TricapCubeB-Co3Se1Se3    | -6578.5611536 | 33.95 |
| 140 | 4-Icos-1vx-Co5Se2Se4       | -6578.5611480 | 33.96 |
| 141 | 4-Icos-1vx-Co2Se1Se1       | -6578.5611408 | 33.96 |
| 142 | 4-Icos-1vx-Co1Se1Se4       | -6578.5611304 | 33.97 |
| 143 | 2-TricapCubeA-Co4Se4Se2    | -6578.5611276 | 33.97 |
| 144 | 3-TricapCubeB-Co3Se2Se4    | -6578.5611256 | 33.97 |
| 145 | 4-Icos-1vx-Co3Se5Se1       | -6578.5611222 | 33.97 |
| 146 | 2-TricapCubeA-Co1Se1Se7    | -6578.5611140 | 33.98 |
| 147 | 4-Icos-1vx-Co5Se1Se6       | -6578.5611043 | 33.98 |
| 148 | 2-TricapCubeA-Co3Se3Se1    | -6578.5610610 | 34.01 |
| 149 | 2-TricapCubeA-Co2Se1Se6    | -6578.5577108 | 36.11 |
| 150 | 2-TricapCubeA-Co3Se1Se5    | -6578.5576936 | 36.12 |
| 151 | 4-Icos-1vx-Co4Se1Se3       | -6578.5576637 | 36.14 |
| 152 | 2-TricapCubeA-Co2Se3Se1    | -6578.5576526 | 36.15 |
| 153 | 2-TricapCubeA-Co4Se1Se3    | -6578.5558071 | 37.31 |
| 154 | 3-TricapCubeB-Co3Se2Se2    | -6578.5557964 | 37.31 |
| 155 | 1-PentaCapTriPri-Co2Se1Se4 | -6578.5557765 | 37.33 |
| 156 | 3-TricapCubeB-Co4Se1Se5    | -6578.5557733 | 37.33 |
| 157 | 4-Icos-1vx-Co2Se1Se3       | -6578.5557683 | 37.33 |
| 158 | 4-Icos-1vx-Co3Se6Se1       | -6578.5557542 | 37.34 |
| 159 | 2-TricapCubeA-Co3Se4Se2    | -6578.5557491 | 37.34 |
| 160 | 4-Icos-1vx-Co5Se1Se1       | -6578.5557194 | 37.36 |
| 161 | 2-TricapCubeA-Co3Se1Se9    | -6578.5557127 | 37.37 |
| 162 | 2-TricapCubeA-Co3Se8Se1    | -6578.5557113 | 37.37 |
| 163 | 1-PentaCapTriPri-Co2Se6Se1 | -6578.5536008 | 38.69 |
| 164 | 3-TricapCubeB-Co3Se1Se4    | -6578.5535696 | 38.71 |
| 165 | 3-TricapCubeB-Co2Se1Se1    | -6578.5535568 | 38.72 |
| 166 | 4-Icos-1vx-Co3Se2Se1       | -6578.5535490 | 38.72 |
| 167 | 4-Icos-1vx-Co2Se6Se1       | -6578.5535204 | 38.74 |
| 168 | 4-Icos-1vx-Co5Se2Se5       | -6578.5521330 | 39.61 |

|     |                              |               |       |
|-----|------------------------------|---------------|-------|
| 169 | 4-Icos-1vx-Co3Se5Se2         | -6578.5521200 | 39.62 |
| 170 | 4-Icos-1vx-Co2Se1Se7         | -6578.5519341 | 39.74 |
| 171 | 3-TricapCubeB-Co3Se4Se2      | -6578.5519104 | 39.75 |
| 172 | 3-TricapCubeB-Co4Se4Se2      | -6578.5519070 | 39.76 |
| 173 | 2-TricapCubeA-Co4Se1Se5      | -6578.5518927 | 39.76 |
| 174 | 4-Icos-1vx-Co2Se4Se1         | -6578.5518867 | 39.77 |
| 175 | 4-Icos-1vx-Co4Se1Se2         | -6578.5516742 | 39.90 |
| 176 | 2-TricapCubeA-Co3Se1Se7      | -6578.5516640 | 39.91 |
| 177 | 3-TricapCubeB-Co1Se1Se1      | -6578.5516168 | 39.94 |
| 178 | 2-TricapCubeA-Co4Se3Se1      | -6578.5515753 | 39.96 |
| 179 | 1-PentaCapTriPri-Co2Se1Se2   | -6578.5491284 | 41.50 |
| 180 | 4-Icos-1vx-Co5Se1Se8         | -6578.5490929 | 41.52 |
| 181 | 3-TricapCubeB-Co4Se4Se3      | -6578.5490860 | 41.53 |
| 182 | 4-Icos-1vx-Co5Se4Se3         | -6578.5490845 | 41.53 |
| 183 | 3-TricapCubeB-Co4Se5Se1      | -6578.5490612 | 41.54 |
| 184 | 2-TricapCubeA-Co4Se1Se6      | -6578.5482421 | 42.06 |
| 185 | 2-TricapCubeA-Co3Se8Se2      | -6578.5482273 | 42.06 |
| 186 | 4-Icos-1vx-Co1Se3Se2         | -6578.5481780 | 42.10 |
| 187 | 4-Icos-1vx-Co3Se4Se3         | -6578.5481607 | 42.11 |
| 188 | 2-TricapCubeA-Co2Se1Se1      | -6578.5472803 | 42.66 |
| 189 | 3-TricapCubeB-Co1Se1Se5      | -6578.5472771 | 42.66 |
| 190 | 4-Icos-1vx-Co4Se3Se1         | -6578.5472710 | 42.66 |
| 191 | 4-Icos-1vx-Co4Se3Se5         | -6578.5472679 | 42.67 |
| 192 | 2-TricapCubeA-Co2Se3Se4      | -6578.5472633 | 42.67 |
| 193 | 2-TricapCubeA-Co3Se1Se4      | -6578.5472536 | 42.68 |
| 194 | 3-TricapCubeB-Co1Se1Se7      | -6578.5472467 | 42.68 |
| 195 | 2-TricapCubeA-Co2Se1Se4 i-16 | -6578.5472305 | 42.69 |
| 196 | 2-TricapCubeA-Co3Se3Se2      | -6578.5472241 | 42.69 |
| 197 | 2-TricapCubeA-Co2Se1Se4 r-16 | -6578.5471855 | 42.72 |
| 198 | 1-PentaCapTriPri-Co2Se5Se5   | -6578.5450205 | 44.08 |
| 199 | 3-TricapCubeB-Co1Se4Se1      | -6578.5444877 | 44.41 |
| 200 | 2-TricapCubeA-Co3Se2Se8      | -6578.5444636 | 44.43 |
| 201 | 2-TricapCubeA-Co4Se4Se1      | -6578.5444611 | 44.43 |
| 202 | 4-Icos-1vx-Co4Se1Se9         | -6578.5444469 | 44.44 |
| 203 | 2-TricapCubeA-Co1Se1Se6      | -6578.5444436 | 44.44 |
| 204 | 2-TricapCubeA-Co2Se1Se2      | -6578.5444412 | 44.44 |
| 205 | 1-PentaCapTriPri-Co2Se1Se1   | -6578.5444274 | 44.45 |
| 206 | 4-Icos-1vx-Co3Se5Se3         | -6578.5444234 | 44.45 |
| 207 | 4-Icos-1vx-Co3Se3Se3         | -6578.5444140 | 44.46 |
| 208 | 4-Icos-1vx-Co4Se2Se6         | -6578.5444131 | 44.46 |
| 209 | 4-Icos-1vx-Co4Se4Se2         | -6578.5443897 | 44.47 |
| 210 | 2-TricapCubeA-Co3Se1Se8      | -6578.5443837 | 44.48 |
| 211 | 2-TricapCubeA-Co1Se3Se6      | -6578.5443618 | 44.49 |



|     |                            |               |       |
|-----|----------------------------|---------------|-------|
| 212 | 3-TricapCubeB-Co1Se1Se9    | -6578.5443419 | 44.50 |
| 213 | 3-TricapCubeB-Co3Se2Se6    | -6578.5443333 | 44.51 |
| 214 | 2-TricapCubeA-Co4Se2Se4    | -6578.5441801 | 44.60 |
| 215 | 4-Icos-1vx-Co1Se1Se3       | -6578.5441669 | 44.61 |
| 216 | 4-Icos-1vx-Co2Se1Se9       | -6578.5441642 | 44.61 |
| 217 | 4-Icos-1vx-Co3Se1Se9       | -6578.5441406 | 44.63 |
| 218 | 4-Icos-1vx-Co2Se2Se6       | -6578.5441255 | 44.64 |
| 219 | 4-Icos-1vx-Co1Se2Se5       | -6578.5441229 | 44.64 |
| 220 | 4-Icos-1vx-Co2Se3Se2       | -6578.5441052 | 44.65 |
| 221 | 4-Icos-1vx-Co3Se6Se4       | -6578.5410026 | 46.60 |
| 222 | 4-Icos-1vx-Co5Se1Se2       | -6578.5409513 | 46.63 |
| 223 | 2-TricapCubeA-Co2Se3Se3    | -6578.5408872 | 46.67 |
| 224 | 2-TricapCubeA-Co1Se1Se4    | -6578.5408828 | 46.67 |
| 225 | 3-TricapCubeB-Co3Se6Se1    | -6578.5408569 | 46.69 |
| 226 | 2-TricapCubeA-Co3Se1Se2    | -6578.5408233 | 46.71 |
| 227 | 2-TricapCubeA-Co3Se4Se1    | -6578.5393597 | 47.63 |
| 228 | 4-Icos-1vx-Co4Se1Se8       | -6578.5393315 | 47.65 |
| 229 | 4-Icos-1vx-Co5Se1Se5       | -6578.5393002 | 47.67 |
| 230 | 4-Icos-1vx-Co3Se2Se3       | -6578.5392874 | 47.67 |
| 231 | 1-PentaCapTriPri-Co1Se1Se6 | -6578.5392678 | 47.69 |
| 232 | 3-TricapCubeB-Co1Se1Se8    | -6578.5392018 | 47.73 |
| 233 | 3-TricapCubeB-Co4Se4Se1    | -6578.5389047 | 47.91 |
| 234 | 4-Icos-1vx-Co1Se1Se6       | -6578.5384148 | 48.22 |
| 235 | 2-TricapCubeA-Co4Se3Se4    | -6578.5378997 | 48.55 |
| 236 | 4-Icos-1vx-Co5Se4Se5       | -6578.5369700 | 49.13 |
| 237 | 2-TricapCubeA-Co4Se9Se1    | -6578.5369320 | 49.15 |
| 238 | 2-TricapCubeA-Co3Se1Se1    | -6578.5369120 | 49.16 |
| 239 | 3-TricapCubeB-Co4Se2Se1    | -6578.5368918 | 49.18 |
| 240 | 3-TricapCubeB-Co2Se3Se6    | -6578.5366790 | 49.31 |
| 241 | 4-Icos-1vx-Co1Se3Se1       | -6578.5366579 | 49.32 |
| 242 | 2-TricapCubeA-Co3Se2Se6    | -6578.5366526 | 49.33 |
| 243 | 3-TricapCubeB-Co1Se2Se4    | -6578.5360376 | 49.71 |
| 244 | 3-TricapCubeB-Co4Se3Se2    | -6578.5360224 | 49.72 |
| 245 | 3-TricapCubeB-Co3Se3Se2    | -6578.5360146 | 49.73 |
| 246 | 3-TricapCubeB-Co4Se2Se5    | -6578.5360130 | 49.73 |
| 247 | 4-Icos-1vx-Co1Se2Se2_r-22  | -6578.5360107 | 49.73 |
| 248 | 3-TricapCubeB-Co1Se2Se5    | -6578.5360096 | 49.73 |
| 249 | 4-Icos-1vx-Co5Se3Se2       | -6578.5359613 | 49.76 |
| 250 | 2-TricapCubeA-Co4Se5Se5    | -6578.5359552 | 49.77 |
| 251 | 1-PentaCapTriPri-Co2Se4Se3 | -6578.5359523 | 49.77 |
| 252 | 3-TricapCubeB-Co3Se1Se2    | -6578.5359326 | 49.78 |
| 253 | 4-Icos-1vx-Co4Se3Se2       | -6578.5355889 | 50.00 |
| 254 | 1-PentaCapTriPri-Co1Se2Se5 | -6578.5355738 | 50.00 |

|     |                              |               |       |
|-----|------------------------------|---------------|-------|
| 255 | 2-TricapCubeA-Co1Se2Se4      | -6578.5355475 | 50.02 |
| 256 | 2-TricapCubeA-Co3Se3Se4      | -6578.5355382 | 50.03 |
| 257 | 4-Icos-1vx-Co3Se2Se4         | -6578.5344415 | 50.72 |
| 258 | 2-TricapCubeA-Co1Se1Se1      | -6578.5344294 | 50.72 |
| 259 | 3-TricapCubeB-Co4Se2Se2      | -6578.5343869 | 50.75 |
| 260 | 4-Icos-1vx-Co3Se1Se6         | -6578.5343180 | 50.79 |
| 261 | 4-Icos-1vx-Co3Se4Se2         | -6578.5342950 | 50.81 |
| 262 | 2-TricapCubeA-Co4Se4Se3      | -6578.5342836 | 50.81 |
| 263 | 3-TricapCubeB-Co3Se1Se5      | -6578.5342362 | 50.84 |
| 264 | 4-Icos-1vx-Co3Se2Se5         | -6578.5338972 | 51.06 |
| 265 | 3-TricapCubeB-Co2Se1Se2      | -6578.5336916 | 51.19 |
| 266 | 1-PentaCapTriPri-Co1Se1Se9   | -6578.5333188 | 51.42 |
| 267 | 3-TricapCubeB-Co1Se3Se5      | -6578.5313080 | 52.68 |
| 268 | 3-TricapCubeB-Co3Se1Se8      | -6578.5313001 | 52.69 |
| 269 | 4-Icos-1vx-Co5Se1Se3         | -6578.5312486 | 52.72 |
| 270 | 2-TricapCubeA-Co4Se1Se4      | -6578.5312053 | 52.75 |
| 271 | 2-TricapCubeA-Co1Se3Se5      | -6578.5311508 | 52.78 |
| 272 | 4-Icos-1vx-Co3Se3Se2         | -6578.5311373 | 52.79 |
| 273 | 2-TricapCubeA-Co1Se1Se2      | -6578.5310342 | 52.85 |
| 274 | 2-TricapCubeA-Co3Se5Se4      | -6578.5302813 | 53.33 |
| 275 | 4-Icos-1vx-Co4Se5Se2         | -6578.5302397 | 53.35 |
| 276 | 1-PentaCapTriPri-Co2Se2Se2   | -6578.5302198 | 53.36 |
| 277 | 2-TricapCubeA-Co4Se7Se2      | -6578.5301903 | 53.38 |
| 278 | 4-Icos-1vx-Co5Se2Se2         | -6578.5292798 | 53.95 |
| 279 | 4-Icos-1vx-Co2Se2Se2         | -6578.5291640 | 54.03 |
| 280 | 4-Icos-1vx-Co3Se4Se5         | -6578.5290952 | 54.07 |
| 281 | 4-Icos-1vx-Co3Se6Se2         | -6578.5290584 | 54.09 |
| 282 | 2-TricapCubeA-Co4Se4Se6 r-22 | -6578.5289696 | 54.15 |
| 283 | 2-TricapCubeA-Co3Se3Se5      | -6578.5289451 | 54.16 |
| 284 | 2-TricapCubeA-Co4Se3Se6      | -6578.5289314 | 54.17 |
| 285 | 3-TricapCubeB-Co3Se3Se1      | -6578.5289128 | 54.18 |
| 286 | 4-Icos-1vx-Co3Se1Se8         | -6578.5288370 | 54.23 |
| 287 | 1-PentaCapTriPri-Co2Se3Se2   | -6578.5287588 | 54.28 |
| 288 | 2-TricapCubeA-Co3Se1Se3      | -6578.5287404 | 54.29 |
| 289 | 2-TricapCubeA-Co4Se2Se3      | -6578.5286633 | 54.34 |
| 290 | 2-TricapCubeA-Co3Se7Se3      | -6578.5286435 | 54.35 |
| 291 | 4-Icos-1vx-Co4Se2Se4         | -6578.5286403 | 54.36 |
| 292 | 3-TricapCubeB-Co1Se2Se3      | -6578.5286127 | 54.37 |
| 293 | 1-PentaCapTriPri-Co1Se2Se2   | -6578.5285953 | 54.38 |
| 294 | 3-TricapCubeB-Co1Se2Se2      | -6578.5285701 | 54.40 |
| 295 | 3-TricapCubeB-Co3Se2Se5      | -6578.5285584 | 54.41 |
| 296 | 2-TricapCubeA-Co4Se4Se5      | -6578.5285569 | 54.41 |
| 297 | 2-TricapCubeA-Co3Se5Se2      | -6578.5285476 | 54.41 |

|     |                            |               |       |
|-----|----------------------------|---------------|-------|
| 298 | 4-Icos-1vx-Co3Se7Se3       | -6578.5285149 | 54.43 |
| 299 | 4-Icos-1vx-Co4Se3Se6       | -6578.5284105 | 54.50 |
| 300 | 3-TricapCubeB-Co1Se3Se6    | -6578.5283839 | 54.52 |
| 301 | 3-TricapCubeB-Co2Se1Se4    | -6578.5283538 | 54.54 |
| 302 | 1-PentaCapTriPri-Co2Se3Se6 | -6578.5276079 | 55.00 |
| 303 | 1-PentaCapTriPri-Co2Se3Se7 | -6578.5276011 | 55.01 |
| 304 | 2-TricapCubeA-Co3Se3Se7    | -6578.5275991 | 55.01 |
| 305 | 4-Icos-1vx-Co3Se2Se7       | -6578.5275639 | 55.03 |
| 306 | 4-Icos-1vx-Co4Se3Se4       | -6578.5275111 | 55.06 |
| 307 | 1-PentaCapTriPri-Co2Se3Se5 | -6578.5257760 | 56.15 |
| 308 | 4-Icos-1vx-Co4Se2Se1       | -6578.5254129 | 56.38 |
| 309 | 4-Icos-1vx-Co3Se1Se3       | -6578.5254063 | 56.38 |
| 310 | 2-TricapCubeA-Co3Se3Se6    | -6578.5254061 | 56.39 |
| 311 | 4-Icos-1vx-Co2Se3Se5       | -6578.5249161 | 56.69 |
| 312 | 4-Icos-1vx-Co2Se1Se8       | -6578.5249083 | 56.70 |
| 313 | 2-TricapCubeA-Co3Se2Se3    | -6578.5245681 | 56.91 |
| 314 | 2-TricapCubeA-Co3Se6Se1    | -6578.5240545 | 57.23 |
| 315 | 3-TricapCubeB-Co4Se3Se1    | -6578.5240405 | 57.24 |
| 316 | 3-TricapCubeB-Co4Se3Se3    | -6578.5240383 | 57.24 |
| 317 | 3-TricapCubeB-Co1Se3Se1    | -6578.5239896 | 57.27 |
| 318 | 2-TricapCubeA-Co3Se4Se4    | -6578.5239688 | 57.29 |
| 319 | 4-Icos-1vx-Co1Se1Se2       | -6578.5230352 | 57.87 |
| 320 | 4-Icos-1vx-Co3Se1Se7       | -6578.5230224 | 57.88 |
| 321 | 1-PentaCapTriPri-Co2Se2Se5 | -6578.5219466 | 58.56 |
| 322 | 2-TricapCubeA-Co4Se1Se9    | -6578.5219136 | 58.58 |
| 323 | 4-Icos-1vx-Co2Se2Se4       | -6578.5212678 | 58.98 |
| 324 | 4-Icos-1vx-Co1Se3Se6       | -6578.5210596 | 59.11 |
| 325 | 3-TricapCubeB-Co3Se1Se9    | -6578.5209797 | 59.16 |
| 326 | 3-TricapCubeB-Co3Se3Se5    | -6578.5209312 | 59.19 |
| 327 | 3-TricapCubeB-Co4Se3Se6    | -6578.5209030 | 59.21 |
| 328 | 3-TricapCubeB-Co4Se2Se8    | -6578.5208892 | 59.22 |
| 329 | 4-Icos-1vx-Co5Se3Se6       | -6578.5208627 | 59.24 |
| 330 | 3-TricapCubeB-Co4Se1Se9    | -6578.5205302 | 59.44 |
| 331 | 3-TricapCubeB-Co4Se2Se6    | -6578.5205255 | 59.45 |
| 332 | 4-Icos-1vx-Co5Se2Se8       | -6578.5204657 | 59.49 |
| 333 | 3-TricapCubeB-Co4Se3Se5    | -6578.5204615 | 59.49 |
| 334 | 4-Icos-1vx-Co5Se3Se5       | -6578.5204553 | 59.49 |
| 335 | 3-TricapCubeB-Co4Se1Se8    | -6578.5204425 | 59.50 |
| 336 | 1-PentaCapTriPri-Co1Se1Se7 | -6578.5204331 | 59.51 |
| 337 | 4-Icos-1vx-Co5Se2Se6       | -6578.5204303 | 59.51 |
| 338 | 3-TricapCubeB-Co2Se4Se3    | -6578.5203439 | 59.56 |
| 339 | 3-TricapCubeB-Co2Se3Se4    | -6578.5203426 | 59.56 |
| 340 | 2-TricapCubeA-Co3Se6Se3    | -6578.5203282 | 59.57 |

|     |                              |               |       |
|-----|------------------------------|---------------|-------|
| 341 | 4-Icos-1vx-Co4Se6Se1         | -6578.5202910 | 59.59 |
| 342 | 4-Icos-1vx-Co2Se2Se8         | -6578.5197683 | 59.92 |
| 343 | 2-TricapCubeA-Co4Se1Se8      | -6578.5197626 | 59.93 |
| 344 | 4-Icos-1vx-Co2Se5Se1         | -6578.5197389 | 59.94 |
| 345 | 2-TricapCubeA-Co2Se3Se6      | -6578.5189349 | 60.45 |
| 346 | 4-Icos-1vx-Co4Se1Se7         | -6578.5188625 | 60.49 |
| 347 | 2-TricapCubeA-Co4Se3Se3      | -6578.5187882 | 60.54 |
| 348 | 3-TricapCubeB-Co4Se1Se3      | -6578.5187822 | 60.54 |
| 349 | 3-TricapCubeB-Co2Se2Se2      | -6578.5185775 | 60.67 |
| 350 | 2-TricapCubeA-Co4Se6Se3      | -6578.5185538 | 60.69 |
| 351 | 4-Icos-1vx-Co3Se3Se1         | -6578.5184976 | 60.72 |
| 352 | 4-Icos-1vx-Co5Se3Se3         | -6578.5184923 | 60.72 |
| 353 | 3-TricapCubeB-Co2Se3Se3      | -6578.5184796 | 60.73 |
| 354 | 3-TricapCubeB-Co2Se2Se1      | -6578.5184756 | 60.73 |
| 355 | 1-PentaCapTriPri-Co2Se1Se6   | -6578.5183271 | 60.83 |
| 356 | 2-TricapCubeA-Co4Se4Se6_i-22 | -6578.5178132 | 61.15 |
| 357 | 2-TricapCubeA-Co2Se5Se1      | -6578.5174932 | 61.35 |
| 358 | 3-TricapCubeB-Co1Se3Se7      | -6578.5158281 | 62.40 |
| 359 | 4-Icos-1vx-Co4Se1Se5         | -6578.5157794 | 62.43 |
| 360 | 3-TricapCubeB-Co1Se2Se7      | -6578.5157515 | 62.44 |
| 361 | 2-TricapCubeA-Co3Se5Se1      | -6578.5156755 | 62.49 |
| 362 | 4-Icos-1vx-Co5Se2Se3         | -6578.5156489 | 62.51 |
| 363 | 4-Icos-1vx-Co3Se2Se6         | -6578.5152969 | 62.73 |
| 364 | 2-TricapCubeA-Co4Se3Se7      | -6578.5147939 | 63.04 |
| 365 | 2-TricapCubeA-Co4Se2Se7      | -6578.5145670 | 63.19 |
| 366 | 1-PentaCapTriPri-Co2Se2Se3   | -6578.5145376 | 63.21 |
| 367 | 4-Icos-1vx-Co3Se7Se1         | -6578.5137294 | 63.71 |
| 368 | 2-TricapCubeA-Co4Se5Se3      | -6578.5136896 | 63.74 |
| 369 | 4-Icos-1vx-Co4Se3Se7         | -6578.5134885 | 63.86 |
| 370 | 4-Icos-1vx-Co3Se2Se8         | -6578.5134582 | 63.88 |
| 371 | 4-Icos-1vx-Co4Se2Se7         | -6578.5133698 | 63.94 |
| 372 | 2-TricapCubeA-Co3Se2Se7      | -6578.5131649 | 64.07 |
| 373 | 4-Icos-1vx-Co3Se4Se4         | -6578.5131490 | 64.08 |
| 374 | 3-TricapCubeB-Co1Se4Se2      | -6578.5131437 | 64.08 |
| 375 | 4-Icos-1vx-Co1Se4Se2         | -6578.5131351 | 64.09 |
| 376 | 4-Icos-1vx-Co1Se3Se3         | -6578.5131223 | 64.09 |
| 377 | 3-TricapCubeB-Co1Se5Se2      | -6578.5130853 | 64.12 |
| 378 | 4-Icos-1vx-Co4Se2Se8         | -6578.5130650 | 64.13 |
| 379 | 1-PentaCapTriPri-Co2Se2Se4   | -6578.5125183 | 64.47 |
| 380 | 2-TricapCubeA-Co2Se2Se2      | -6578.5121722 | 64.69 |
| 381 | 4-Icos-1vx-Co2Se3Se1         | -6578.5121211 | 64.72 |
| 382 | 4-Icos-1vx-Co2Se3Se3         | -6578.5120968 | 64.74 |
| 383 | 2-TricapCubeA-Co2Se2Se1_r-14 | -6578.5120512 | 64.77 |

|     |                              |               |       |
|-----|------------------------------|---------------|-------|
| 384 | 2-TricapCubeA-Co2Se2Se1_i-14 | -6578.5118957 | 64.86 |
| 385 | 1-PentaCapTriPri-Co2Se5Se4   | -6578.5117523 | 64.95 |
| 386 | 4-Icos-1vx-Co4Se4Se3         | -6578.5108401 | 65.53 |
| 387 | 1-PentaCapTriPri-Co1Se2Se3   | -6578.5108103 | 65.54 |
| 388 | 4-Icos-1vx-Co5Se2Se1         | -6578.5093104 | 66.49 |
| 389 | 4-Icos-1vx-Co2Se4Se2         | -6578.5086391 | 66.91 |
| 390 | 2-TricapCubeA-Co2Se3Se5      | -6578.5086365 | 66.91 |
| 391 | 4-Icos-1vx-Co1Se2Se4         | -6578.5083427 | 67.09 |
| 392 | 1-PentaCapTriPri-Co1Se3Se1   | -6578.5082689 | 67.14 |
| 393 | 4-Icos-1vx-Co5Se3Se1         | -6578.5082262 | 67.17 |
| 394 | 3-TricapCubeB-Co3Se3Se4      | -6578.5082226 | 67.17 |
| 395 | 1-PentaCapTriPri-Co1Se1Se4   | -6578.5079239 | 67.36 |
| 396 | 2-TricapCubeA-Co3Se5Se5      | -6578.5078141 | 67.42 |
| 397 | 1-PentaCapTriPri-Co1Se3Se3   | -6578.5077844 | 67.44 |
| 398 | 4-Icos-1vx-Co1Se4Se3         | -6578.5077665 | 67.45 |
| 399 | 3-TricapCubeB-Co1Se6Se1      | -6578.5077332 | 67.48 |
| 400 | 1-PentaCapTriPri-Co1Se4Se1   | -6578.5077268 | 67.48 |
| 401 | 3-TricapCubeB-Co4Se3Se7      | -6578.5076913 | 67.50 |
| 402 | 4-Icos-1vx-Co1Se2Se2_i-22    | -6578.5072818 | 67.76 |
| 403 | 4-Icos-1vx-Co2Se3Se7         | -6578.5060734 | 68.52 |
| 404 | 4-Icos-1vx-Co2Se2Se7         | -6578.5060528 | 68.53 |
| 405 | 2-TricapCubeA-Co4Se2Se5      | -6578.5059129 | 68.62 |
| 406 | 4-Icos-1vx-Co3Se2Se2         | -6578.5059111 | 68.62 |
| 407 | 3-TricapCubeB-Co3Se1Se7      | -6578.5058209 | 68.68 |
| 408 | 2-TricapCubeA-Co2Se2Se5      | -6578.5056458 | 68.79 |
| 409 | 1-PentaCapTriPri-Co2Se1Se5   | -6578.5055817 | 68.83 |
| 410 | 4-Icos-1vx-Co2Se3Se4         | -6578.5052453 | 69.04 |
| 411 | 4-Icos-1vx-Co4Se5Se1         | -6578.5049239 | 69.24 |
| 412 | 4-Icos-1vx-Co1Se1Se1         | -6578.5048520 | 69.28 |
| 413 | 3-TricapCubeB-Co4Se3Se4      | -6578.5040992 | 69.76 |
| 414 | 3-TricapCubeB-Co3Se2Se8      | -6578.5039294 | 69.86 |
| 415 | 3-TricapCubeB-Co3Se5Se1      | -6578.5039285 | 69.86 |
| 416 | 4-Icos-1vx-Co2Se4Se3         | -6578.5038696 | 69.90 |
| 417 | 4-Icos-1vx-Co3Se3Se6         | -6578.5038537 | 69.91 |
| 418 | 3-TricapCubeB-Co3Se3Se6      | -6578.5038482 | 69.91 |
| 419 | 1-PentaCapTriPri-Co1Se1Se3   | -6578.5023908 | 70.83 |
| 420 | 4-Icos-1vx-Co5Se5Se1         | -6578.5017324 | 71.24 |
| 421 | 3-TricapCubeB-Co2Se1Se5      | -6578.5006861 | 71.90 |
| 422 | 3-TricapCubeB-Co1Se3Se4      | -6578.5006634 | 71.91 |
| 423 | 3-TricapCubeB-Co2Se2Se6      | -6578.5006151 | 71.94 |
| 424 | 2-TricapCubeA-Co2Se3Se2      | -6578.5002889 | 72.15 |
| 425 | 3-TricapCubeB-Co2Se4Se1      | -6578.4994174 | 72.69 |
| 426 | 3-TricapCubeB-Co2Se3Se5      | -6578.4993814 | 72.72 |

|     |                            |               |        |
|-----|----------------------------|---------------|--------|
| 427 | 3-TricapCubeB-Co2Se1Se8    | -6578.4993723 | 72.72  |
| 428 | 2-TricapCubeA-Co2Se2Se6    | -6578.4988514 | 73.05  |
| 429 | 2-TricapCubeA-Co4Se2Se8    | -6578.4977537 | 73.74  |
| 430 | 1-PentaCapTriPri-Co2Se5Se2 | -6578.4962233 | 74.70  |
| 431 | 3-TricapCubeB-Co4Se1Se7    | -6578.4952153 | 75.33  |
| 432 | 4-Icos-1vx-Co2Se3Se6       | -6578.4940977 | 76.03  |
| 433 | 4-Icos-1vx-Co2Se5Se2       | -6578.4939754 | 76.11  |
| 434 | 1-PentaCapTriPri-Co1Se2Se1 | -6578.4931064 | 76.65  |
| 435 | 4-Icos-1vx-Co1Se2Se3       | -6578.4928647 | 76.81  |
| 436 | 4-Icos-1vx-Co3Se3Se4       | -6578.4925194 | 77.02  |
| 437 | 2-TricapCubeA-Co4Se1Se1    | -6578.4912131 | 77.84  |
| 438 | 3-TricapCubeB-Co3Se4Se3    | -6578.4903219 | 78.40  |
| 439 | 3-TricapCubeB-Co3Se1Se6    | -6578.4888494 | 79.33  |
| 440 | 4-Icos-1vx-Co3Se3Se5       | -6578.4887466 | 79.39  |
| 441 | 1-PentaCapTriPri-Co1Se1Se1 | -6578.4871154 | 80.41  |
| 442 | 1-PentaCapTriPri-Co2Se4Se1 | -6578.4863892 | 80.87  |
| 443 | 3-TricapCubeB-Co2Se2Se7    | -6578.4842224 | 82.23  |
| 444 | 3-TricapCubeB-Co2Se4Se2    | -6578.4841846 | 82.25  |
| 445 | 3-TricapCubeB-Co2Se3Se7    | -6578.4841832 | 82.25  |
| 446 | 2-TricapCubeA-Co1Se3Se2    | -6578.4837260 | 82.54  |
| 447 | 3-TricapCubeB-Co2Se2Se3    | -6578.4819245 | 83.67  |
| 448 | 3-TricapCubeB-Co2Se1Se9    | -6578.4818555 | 83.71  |
| 449 | 1-PentaCapTriPri-Co1Se2Se4 | -6578.4815315 | 83.92  |
| 450 | 4-Icos-1vx-Co1Se4Se1       | -6578.4808428 | 84.35  |
| 451 | 1-PentaCapTriPri-Co1Se3Se4 | -6578.4803481 | 84.66  |
| 452 | 3-TricapCubeB-Co1Se1Se6    | -6578.4702036 | 91.03  |
| 453 | 1-PentaCapTriPri-Co2Se5Se3 | -6578.4691782 | 91.67  |
| 454 | 3-TricapCubeB-Co1Se2Se8    | -6578.4681788 | 92.30  |
| 455 | 1-PentaCapTriPri-Co2Se4Se4 | -6578.4680835 | 92.36  |
| 456 | 1-PentaCapTriPri-Co2Se3Se1 | -6578.4680503 | 92.38  |
| 457 | 1-PentaCapTriPri-Co2Se4Se6 | -6578.4672363 | 92.89  |
| 458 | 1-PentaCapTriPri-Co2Se2Se1 | -6578.4666185 | 93.28  |
| 459 | 2-TricapCubeA-Co4Se3Se5    | -6578.4659254 | 93.71  |
| 460 | 3-TricapCubeB-Co2Se2Se5    | -6578.4630171 | 95.54  |
| 461 | 3-TricapCubeB-Co2Se6Se1    | -6578.4629362 | 95.59  |
| 462 | 2-TricapCubeA-Co4Se5Se1    | -6578.4593344 | 97.85  |
| 463 | 2-TricapCubeA-Co1Se3Se3    | -6578.4544629 | 100.90 |
| 464 | 4-Icos-1vx-Co1Se2Se1       | -6578.4511233 | 103.00 |
| 465 | 1-PentaCapTriPri-Co2Se3Se4 | -6578.4471603 | 105.49 |
| 466 | 1-PentaCapTriPri-Co2Se4Se5 | -6578.4456616 | 106.43 |
| 467 | 3-TricapCubeB-Co2Se3Se2    | -6578.4168480 | 124.51 |

Table S5A. Initial CpCoSe<sub>2</sub>B<sub>9</sub>H<sub>9</sub> structures, 150 structures.

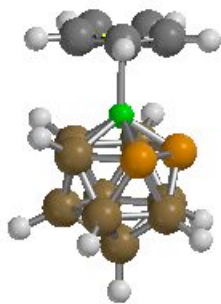

1. Icosahedron 9 structures

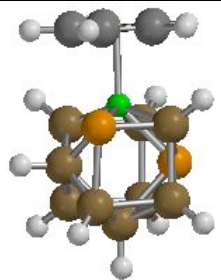

2. Cubeoctahedron 53 structures

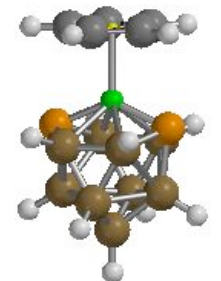

3. Anticubeoctahedron 88 structures

Table S5B. Distance table for the lowest-lying CpCoSe<sub>2</sub>B<sub>9</sub>H<sub>9</sub> structures after M06L/6-311G(d,p) optimization. Included are the ZPcorrected E (a.u.), relative energy (kcal/mol) and symmetry.

| 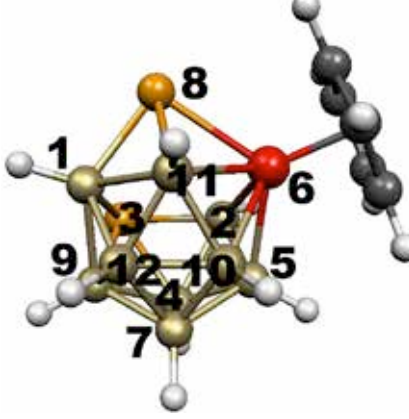 <p>1. -6608.2722608 0.0 C<sub>1</sub></p>     | <table border="1"> <thead> <tr> <th></th> <th>1</th> <th>2</th> <th>3</th> <th>4</th> <th>5</th> </tr> </thead> <tbody> <tr><td>1 B</td><td>0.000000</td><td></td><td></td><td></td><td></td></tr> <tr><td>2 B</td><td>3.173086</td><td>0.000000</td><td></td><td></td><td></td></tr> <tr><td>3 Se</td><td>2.445628</td><td>2.033443</td><td>0.000000</td><td></td><td></td></tr> <tr><td>4 B</td><td>3.214985</td><td>1.858278</td><td>2.045929</td><td>0.000000</td><td></td></tr> <tr><td>5 B</td><td>3.474298</td><td>1.717378</td><td>3.151615</td><td>1.763457</td><td>0.000000</td></tr> <tr><td>6 Co</td><td>3.218468</td><td>2.161084</td><td>3.644937</td><td>3.401980</td><td>2.118279</td></tr> <tr><td>7 B</td><td>2.954267</td><td>2.887485</td><td>3.203926</td><td>1.756087</td><td>1.779424</td></tr> <tr><td>8 Se</td><td>2.034479</td><td>3.127516</td><td>3.257663</td><td>4.183145</td><td>3.794754</td></tr> <tr><td>9 B</td><td>1.898684</td><td>2.931980</td><td>2.070987</td><td>1.874788</td><td>2.844965</td></tr> <tr><td>10 B</td><td>2.917814</td><td>2.957370</td><td>3.869872</td><td>2.914024</td><td>1.770505</td></tr> <tr><td>11 B</td><td>2.009127</td><td>3.416247</td><td>3.840728</td><td>3.825513</td><td>3.074116</td></tr> <tr><td>12 B</td><td>1.759454</td><td>3.477391</td><td>3.356154</td><td>2.958397</td><td>2.861313</td></tr> <tr> <td></td> <td>6</td> <td>7</td> <td>8</td> <td>9</td> <td>10</td> </tr> <tr><td>7 B</td><td>3.283234</td><td>0.000000</td><td></td><td></td><td></td></tr> <tr><td>8 Se</td><td>2.371821</td><td>4.154895</td><td>0.000000</td><td></td><td></td></tr> <tr><td>9 B</td><td>3.780240</td><td>1.750963</td><td>3.629346</td><td>0.000000</td><td></td></tr> <tr><td>10 B</td><td>2.098140</td><td>1.738781</td><td>3.346698</td><td>2.845046</td><td>0.000000</td></tr> <tr><td>11 B</td><td>2.167809</td><td>2.971924</td><td>2.013877</td><td>3.098326</td><td>1.776495</td></tr> <tr><td>12 B</td><td>3.215358</td><td>1.757822</td><td>3.181180</td><td>1.750357</td><td>1.773048</td></tr> <tr> <td></td> <td>11</td> <td>12</td> <td></td> <td></td> <td></td> </tr> <tr><td>12 B</td><td>1.777108</td><td>0.000000</td><td></td><td></td><td></td></tr> </tbody> </table>    |          | 1        | 2        | 3        | 4 | 5 | 1 B | 0.000000 |  |  |  |  | 2 B | 3.173086 | 0.000000 |  |  |  | 3 Se | 2.445628 | 2.033443 | 0.000000 |  |  | 4 B | 3.214985 | 1.858278 | 2.045929 | 0.000000 |  | 5 B | 3.474298 | 1.717378 | 3.151615 | 1.763457 | 0.000000 | 6 Co | 3.218468 | 2.161084 | 3.644937 | 3.401980 | 2.118279 | 7 B | 2.954267 | 2.887485 | 3.203926 | 1.756087 | 1.779424 | 8 Se | 2.034479 | 3.127516 | 3.257663 | 4.183145 | 3.794754 | 9 B | 1.898684 | 2.931980 | 2.070987 | 1.874788 | 2.844965 | 10 B  | 2.917814 | 2.957370 | 3.869872 | 2.914024 | 1.770505 | 11 B  | 2.009127 | 3.416247 | 3.840728 | 3.825513 | 3.074116 | 12 B  | 1.759454 | 3.477391 | 3.356154 | 2.958397 | 2.861313 |  | 6 | 7 | 8 | 9 | 10 | 7 B | 3.283234 | 0.000000 |  |  |  | 8 Se | 2.371821 | 4.154895 | 0.000000 |  |  | 9 B | 3.780240 | 1.750963 | 3.629346 | 0.000000 |  | 10 B  | 2.098140 | 1.738781 | 3.346698 | 2.845046 | 0.000000 | 11 B  | 2.167809 | 2.971924 | 2.013877 | 3.098326 | 1.776495 | 12 B  | 3.215358 | 1.757822 | 3.181180 | 1.750357 | 1.773048 |  | 11 | 12 |  |  |  | 12 B  | 1.777108 | 0.000000 |  |  |  |
|---------------------------------------------------------------------------------------------------------------------------------|--------------------------------------------------------------------------------------------------------------------------------------------------------------------------------------------------------------------------------------------------------------------------------------------------------------------------------------------------------------------------------------------------------------------------------------------------------------------------------------------------------------------------------------------------------------------------------------------------------------------------------------------------------------------------------------------------------------------------------------------------------------------------------------------------------------------------------------------------------------------------------------------------------------------------------------------------------------------------------------------------------------------------------------------------------------------------------------------------------------------------------------------------------------------------------------------------------------------------------------------------------------------------------------------------------------------------------------------------------------------------------------------------------------------------------------------------------------------------------------------------------------------------------------------------------------------------------------------------------------------------------------------------------------------------------------------------------------------------------------------------------------------------------------------------------------------------------------------------------------------------------------------------------------------------------------------------------------------------------------------------------------------------------------------------------------------------------------------------------------------------------------------------------------------------------------------------------------------------------------------------------------------------|----------|----------|----------|----------|---|---|-----|----------|--|--|--|--|-----|----------|----------|--|--|--|------|----------|----------|----------|--|--|-----|----------|----------|----------|----------|--|-----|----------|----------|----------|----------|----------|------|----------|----------|----------|----------|----------|-----|----------|----------|----------|----------|----------|------|----------|----------|----------|----------|----------|-----|----------|----------|----------|----------|----------|-------|----------|----------|----------|----------|----------|-------|----------|----------|----------|----------|----------|-------|----------|----------|----------|----------|----------|--|---|---|---|---|----|-----|----------|----------|--|--|--|------|----------|----------|----------|--|--|-----|----------|----------|----------|----------|--|-------|----------|----------|----------|----------|----------|-------|----------|----------|----------|----------|----------|-------|----------|----------|----------|----------|----------|--|----|----|--|--|--|-------|----------|----------|--|--|--|
|                                                                                                                                 | 1                                                                                                                                                                                                                                                                                                                                                                                                                                                                                                                                                                                                                                                                                                                                                                                                                                                                                                                                                                                                                                                                                                                                                                                                                                                                                                                                                                                                                                                                                                                                                                                                                                                                                                                                                                                                                                                                                                                                                                                                                                                                                                                                                                                                                                                                        | 2        | 3        | 4        | 5        |   |   |     |          |  |  |  |  |     |          |          |  |  |  |      |          |          |          |  |  |     |          |          |          |          |  |     |          |          |          |          |          |      |          |          |          |          |          |     |          |          |          |          |          |      |          |          |          |          |          |     |          |          |          |          |          |       |          |          |          |          |          |       |          |          |          |          |          |       |          |          |          |          |          |  |   |   |   |   |    |     |          |          |  |  |  |      |          |          |          |  |  |     |          |          |          |          |  |       |          |          |          |          |          |       |          |          |          |          |          |       |          |          |          |          |          |  |    |    |  |  |  |       |          |          |  |  |  |
| 1 B                                                                                                                             | 0.000000                                                                                                                                                                                                                                                                                                                                                                                                                                                                                                                                                                                                                                                                                                                                                                                                                                                                                                                                                                                                                                                                                                                                                                                                                                                                                                                                                                                                                                                                                                                                                                                                                                                                                                                                                                                                                                                                                                                                                                                                                                                                                                                                                                                                                                                                 |          |          |          |          |   |   |     |          |  |  |  |  |     |          |          |  |  |  |      |          |          |          |  |  |     |          |          |          |          |  |     |          |          |          |          |          |      |          |          |          |          |          |     |          |          |          |          |          |      |          |          |          |          |          |     |          |          |          |          |          |       |          |          |          |          |          |       |          |          |          |          |          |       |          |          |          |          |          |  |   |   |   |   |    |     |          |          |  |  |  |      |          |          |          |  |  |     |          |          |          |          |  |       |          |          |          |          |          |       |          |          |          |          |          |       |          |          |          |          |          |  |    |    |  |  |  |       |          |          |  |  |  |
| 2 B                                                                                                                             | 3.173086                                                                                                                                                                                                                                                                                                                                                                                                                                                                                                                                                                                                                                                                                                                                                                                                                                                                                                                                                                                                                                                                                                                                                                                                                                                                                                                                                                                                                                                                                                                                                                                                                                                                                                                                                                                                                                                                                                                                                                                                                                                                                                                                                                                                                                                                 | 0.000000 |          |          |          |   |   |     |          |  |  |  |  |     |          |          |  |  |  |      |          |          |          |  |  |     |          |          |          |          |  |     |          |          |          |          |          |      |          |          |          |          |          |     |          |          |          |          |          |      |          |          |          |          |          |     |          |          |          |          |          |       |          |          |          |          |          |       |          |          |          |          |          |       |          |          |          |          |          |  |   |   |   |   |    |     |          |          |  |  |  |      |          |          |          |  |  |     |          |          |          |          |  |       |          |          |          |          |          |       |          |          |          |          |          |       |          |          |          |          |          |  |    |    |  |  |  |       |          |          |  |  |  |
| 3 Se                                                                                                                            | 2.445628                                                                                                                                                                                                                                                                                                                                                                                                                                                                                                                                                                                                                                                                                                                                                                                                                                                                                                                                                                                                                                                                                                                                                                                                                                                                                                                                                                                                                                                                                                                                                                                                                                                                                                                                                                                                                                                                                                                                                                                                                                                                                                                                                                                                                                                                 | 2.033443 | 0.000000 |          |          |   |   |     |          |  |  |  |  |     |          |          |  |  |  |      |          |          |          |  |  |     |          |          |          |          |  |     |          |          |          |          |          |      |          |          |          |          |          |     |          |          |          |          |          |      |          |          |          |          |          |     |          |          |          |          |          |       |          |          |          |          |          |       |          |          |          |          |          |       |          |          |          |          |          |  |   |   |   |   |    |     |          |          |  |  |  |      |          |          |          |  |  |     |          |          |          |          |  |       |          |          |          |          |          |       |          |          |          |          |          |       |          |          |          |          |          |  |    |    |  |  |  |       |          |          |  |  |  |
| 4 B                                                                                                                             | 3.214985                                                                                                                                                                                                                                                                                                                                                                                                                                                                                                                                                                                                                                                                                                                                                                                                                                                                                                                                                                                                                                                                                                                                                                                                                                                                                                                                                                                                                                                                                                                                                                                                                                                                                                                                                                                                                                                                                                                                                                                                                                                                                                                                                                                                                                                                 | 1.858278 | 2.045929 | 0.000000 |          |   |   |     |          |  |  |  |  |     |          |          |  |  |  |      |          |          |          |  |  |     |          |          |          |          |  |     |          |          |          |          |          |      |          |          |          |          |          |     |          |          |          |          |          |      |          |          |          |          |          |     |          |          |          |          |          |       |          |          |          |          |          |       |          |          |          |          |          |       |          |          |          |          |          |  |   |   |   |   |    |     |          |          |  |  |  |      |          |          |          |  |  |     |          |          |          |          |  |       |          |          |          |          |          |       |          |          |          |          |          |       |          |          |          |          |          |  |    |    |  |  |  |       |          |          |  |  |  |
| 5 B                                                                                                                             | 3.474298                                                                                                                                                                                                                                                                                                                                                                                                                                                                                                                                                                                                                                                                                                                                                                                                                                                                                                                                                                                                                                                                                                                                                                                                                                                                                                                                                                                                                                                                                                                                                                                                                                                                                                                                                                                                                                                                                                                                                                                                                                                                                                                                                                                                                                                                 | 1.717378 | 3.151615 | 1.763457 | 0.000000 |   |   |     |          |  |  |  |  |     |          |          |  |  |  |      |          |          |          |  |  |     |          |          |          |          |  |     |          |          |          |          |          |      |          |          |          |          |          |     |          |          |          |          |          |      |          |          |          |          |          |     |          |          |          |          |          |       |          |          |          |          |          |       |          |          |          |          |          |       |          |          |          |          |          |  |   |   |   |   |    |     |          |          |  |  |  |      |          |          |          |  |  |     |          |          |          |          |  |       |          |          |          |          |          |       |          |          |          |          |          |       |          |          |          |          |          |  |    |    |  |  |  |       |          |          |  |  |  |
| 6 Co                                                                                                                            | 3.218468                                                                                                                                                                                                                                                                                                                                                                                                                                                                                                                                                                                                                                                                                                                                                                                                                                                                                                                                                                                                                                                                                                                                                                                                                                                                                                                                                                                                                                                                                                                                                                                                                                                                                                                                                                                                                                                                                                                                                                                                                                                                                                                                                                                                                                                                 | 2.161084 | 3.644937 | 3.401980 | 2.118279 |   |   |     |          |  |  |  |  |     |          |          |  |  |  |      |          |          |          |  |  |     |          |          |          |          |  |     |          |          |          |          |          |      |          |          |          |          |          |     |          |          |          |          |          |      |          |          |          |          |          |     |          |          |          |          |          |       |          |          |          |          |          |       |          |          |          |          |          |       |          |          |          |          |          |  |   |   |   |   |    |     |          |          |  |  |  |      |          |          |          |  |  |     |          |          |          |          |  |       |          |          |          |          |          |       |          |          |          |          |          |       |          |          |          |          |          |  |    |    |  |  |  |       |          |          |  |  |  |
| 7 B                                                                                                                             | 2.954267                                                                                                                                                                                                                                                                                                                                                                                                                                                                                                                                                                                                                                                                                                                                                                                                                                                                                                                                                                                                                                                                                                                                                                                                                                                                                                                                                                                                                                                                                                                                                                                                                                                                                                                                                                                                                                                                                                                                                                                                                                                                                                                                                                                                                                                                 | 2.887485 | 3.203926 | 1.756087 | 1.779424 |   |   |     |          |  |  |  |  |     |          |          |  |  |  |      |          |          |          |  |  |     |          |          |          |          |  |     |          |          |          |          |          |      |          |          |          |          |          |     |          |          |          |          |          |      |          |          |          |          |          |     |          |          |          |          |          |       |          |          |          |          |          |       |          |          |          |          |          |       |          |          |          |          |          |  |   |   |   |   |    |     |          |          |  |  |  |      |          |          |          |  |  |     |          |          |          |          |  |       |          |          |          |          |          |       |          |          |          |          |          |       |          |          |          |          |          |  |    |    |  |  |  |       |          |          |  |  |  |
| 8 Se                                                                                                                            | 2.034479                                                                                                                                                                                                                                                                                                                                                                                                                                                                                                                                                                                                                                                                                                                                                                                                                                                                                                                                                                                                                                                                                                                                                                                                                                                                                                                                                                                                                                                                                                                                                                                                                                                                                                                                                                                                                                                                                                                                                                                                                                                                                                                                                                                                                                                                 | 3.127516 | 3.257663 | 4.183145 | 3.794754 |   |   |     |          |  |  |  |  |     |          |          |  |  |  |      |          |          |          |  |  |     |          |          |          |          |  |     |          |          |          |          |          |      |          |          |          |          |          |     |          |          |          |          |          |      |          |          |          |          |          |     |          |          |          |          |          |       |          |          |          |          |          |       |          |          |          |          |          |       |          |          |          |          |          |  |   |   |   |   |    |     |          |          |  |  |  |      |          |          |          |  |  |     |          |          |          |          |  |       |          |          |          |          |          |       |          |          |          |          |          |       |          |          |          |          |          |  |    |    |  |  |  |       |          |          |  |  |  |
| 9 B                                                                                                                             | 1.898684                                                                                                                                                                                                                                                                                                                                                                                                                                                                                                                                                                                                                                                                                                                                                                                                                                                                                                                                                                                                                                                                                                                                                                                                                                                                                                                                                                                                                                                                                                                                                                                                                                                                                                                                                                                                                                                                                                                                                                                                                                                                                                                                                                                                                                                                 | 2.931980 | 2.070987 | 1.874788 | 2.844965 |   |   |     |          |  |  |  |  |     |          |          |  |  |  |      |          |          |          |  |  |     |          |          |          |          |  |     |          |          |          |          |          |      |          |          |          |          |          |     |          |          |          |          |          |      |          |          |          |          |          |     |          |          |          |          |          |       |          |          |          |          |          |       |          |          |          |          |          |       |          |          |          |          |          |  |   |   |   |   |    |     |          |          |  |  |  |      |          |          |          |  |  |     |          |          |          |          |  |       |          |          |          |          |          |       |          |          |          |          |          |       |          |          |          |          |          |  |    |    |  |  |  |       |          |          |  |  |  |
| 10 B                                                                                                                            | 2.917814                                                                                                                                                                                                                                                                                                                                                                                                                                                                                                                                                                                                                                                                                                                                                                                                                                                                                                                                                                                                                                                                                                                                                                                                                                                                                                                                                                                                                                                                                                                                                                                                                                                                                                                                                                                                                                                                                                                                                                                                                                                                                                                                                                                                                                                                 | 2.957370 | 3.869872 | 2.914024 | 1.770505 |   |   |     |          |  |  |  |  |     |          |          |  |  |  |      |          |          |          |  |  |     |          |          |          |          |  |     |          |          |          |          |          |      |          |          |          |          |          |     |          |          |          |          |          |      |          |          |          |          |          |     |          |          |          |          |          |       |          |          |          |          |          |       |          |          |          |          |          |       |          |          |          |          |          |  |   |   |   |   |    |     |          |          |  |  |  |      |          |          |          |  |  |     |          |          |          |          |  |       |          |          |          |          |          |       |          |          |          |          |          |       |          |          |          |          |          |  |    |    |  |  |  |       |          |          |  |  |  |
| 11 B                                                                                                                            | 2.009127                                                                                                                                                                                                                                                                                                                                                                                                                                                                                                                                                                                                                                                                                                                                                                                                                                                                                                                                                                                                                                                                                                                                                                                                                                                                                                                                                                                                                                                                                                                                                                                                                                                                                                                                                                                                                                                                                                                                                                                                                                                                                                                                                                                                                                                                 | 3.416247 | 3.840728 | 3.825513 | 3.074116 |   |   |     |          |  |  |  |  |     |          |          |  |  |  |      |          |          |          |  |  |     |          |          |          |          |  |     |          |          |          |          |          |      |          |          |          |          |          |     |          |          |          |          |          |      |          |          |          |          |          |     |          |          |          |          |          |       |          |          |          |          |          |       |          |          |          |          |          |       |          |          |          |          |          |  |   |   |   |   |    |     |          |          |  |  |  |      |          |          |          |  |  |     |          |          |          |          |  |       |          |          |          |          |          |       |          |          |          |          |          |       |          |          |          |          |          |  |    |    |  |  |  |       |          |          |  |  |  |
| 12 B                                                                                                                            | 1.759454                                                                                                                                                                                                                                                                                                                                                                                                                                                                                                                                                                                                                                                                                                                                                                                                                                                                                                                                                                                                                                                                                                                                                                                                                                                                                                                                                                                                                                                                                                                                                                                                                                                                                                                                                                                                                                                                                                                                                                                                                                                                                                                                                                                                                                                                 | 3.477391 | 3.356154 | 2.958397 | 2.861313 |   |   |     |          |  |  |  |  |     |          |          |  |  |  |      |          |          |          |  |  |     |          |          |          |          |  |     |          |          |          |          |          |      |          |          |          |          |          |     |          |          |          |          |          |      |          |          |          |          |          |     |          |          |          |          |          |       |          |          |          |          |          |       |          |          |          |          |          |       |          |          |          |          |          |  |   |   |   |   |    |     |          |          |  |  |  |      |          |          |          |  |  |     |          |          |          |          |  |       |          |          |          |          |          |       |          |          |          |          |          |       |          |          |          |          |          |  |    |    |  |  |  |       |          |          |  |  |  |
|                                                                                                                                 | 6                                                                                                                                                                                                                                                                                                                                                                                                                                                                                                                                                                                                                                                                                                                                                                                                                                                                                                                                                                                                                                                                                                                                                                                                                                                                                                                                                                                                                                                                                                                                                                                                                                                                                                                                                                                                                                                                                                                                                                                                                                                                                                                                                                                                                                                                        | 7        | 8        | 9        | 10       |   |   |     |          |  |  |  |  |     |          |          |  |  |  |      |          |          |          |  |  |     |          |          |          |          |  |     |          |          |          |          |          |      |          |          |          |          |          |     |          |          |          |          |          |      |          |          |          |          |          |     |          |          |          |          |          |       |          |          |          |          |          |       |          |          |          |          |          |       |          |          |          |          |          |  |   |   |   |   |    |     |          |          |  |  |  |      |          |          |          |  |  |     |          |          |          |          |  |       |          |          |          |          |          |       |          |          |          |          |          |       |          |          |          |          |          |  |    |    |  |  |  |       |          |          |  |  |  |
| 7 B                                                                                                                             | 3.283234                                                                                                                                                                                                                                                                                                                                                                                                                                                                                                                                                                                                                                                                                                                                                                                                                                                                                                                                                                                                                                                                                                                                                                                                                                                                                                                                                                                                                                                                                                                                                                                                                                                                                                                                                                                                                                                                                                                                                                                                                                                                                                                                                                                                                                                                 | 0.000000 |          |          |          |   |   |     |          |  |  |  |  |     |          |          |  |  |  |      |          |          |          |  |  |     |          |          |          |          |  |     |          |          |          |          |          |      |          |          |          |          |          |     |          |          |          |          |          |      |          |          |          |          |          |     |          |          |          |          |          |       |          |          |          |          |          |       |          |          |          |          |          |       |          |          |          |          |          |  |   |   |   |   |    |     |          |          |  |  |  |      |          |          |          |  |  |     |          |          |          |          |  |       |          |          |          |          |          |       |          |          |          |          |          |       |          |          |          |          |          |  |    |    |  |  |  |       |          |          |  |  |  |
| 8 Se                                                                                                                            | 2.371821                                                                                                                                                                                                                                                                                                                                                                                                                                                                                                                                                                                                                                                                                                                                                                                                                                                                                                                                                                                                                                                                                                                                                                                                                                                                                                                                                                                                                                                                                                                                                                                                                                                                                                                                                                                                                                                                                                                                                                                                                                                                                                                                                                                                                                                                 | 4.154895 | 0.000000 |          |          |   |   |     |          |  |  |  |  |     |          |          |  |  |  |      |          |          |          |  |  |     |          |          |          |          |  |     |          |          |          |          |          |      |          |          |          |          |          |     |          |          |          |          |          |      |          |          |          |          |          |     |          |          |          |          |          |       |          |          |          |          |          |       |          |          |          |          |          |       |          |          |          |          |          |  |   |   |   |   |    |     |          |          |  |  |  |      |          |          |          |  |  |     |          |          |          |          |  |       |          |          |          |          |          |       |          |          |          |          |          |       |          |          |          |          |          |  |    |    |  |  |  |       |          |          |  |  |  |
| 9 B                                                                                                                             | 3.780240                                                                                                                                                                                                                                                                                                                                                                                                                                                                                                                                                                                                                                                                                                                                                                                                                                                                                                                                                                                                                                                                                                                                                                                                                                                                                                                                                                                                                                                                                                                                                                                                                                                                                                                                                                                                                                                                                                                                                                                                                                                                                                                                                                                                                                                                 | 1.750963 | 3.629346 | 0.000000 |          |   |   |     |          |  |  |  |  |     |          |          |  |  |  |      |          |          |          |  |  |     |          |          |          |          |  |     |          |          |          |          |          |      |          |          |          |          |          |     |          |          |          |          |          |      |          |          |          |          |          |     |          |          |          |          |          |       |          |          |          |          |          |       |          |          |          |          |          |       |          |          |          |          |          |  |   |   |   |   |    |     |          |          |  |  |  |      |          |          |          |  |  |     |          |          |          |          |  |       |          |          |          |          |          |       |          |          |          |          |          |       |          |          |          |          |          |  |    |    |  |  |  |       |          |          |  |  |  |
| 10 B                                                                                                                            | 2.098140                                                                                                                                                                                                                                                                                                                                                                                                                                                                                                                                                                                                                                                                                                                                                                                                                                                                                                                                                                                                                                                                                                                                                                                                                                                                                                                                                                                                                                                                                                                                                                                                                                                                                                                                                                                                                                                                                                                                                                                                                                                                                                                                                                                                                                                                 | 1.738781 | 3.346698 | 2.845046 | 0.000000 |   |   |     |          |  |  |  |  |     |          |          |  |  |  |      |          |          |          |  |  |     |          |          |          |          |  |     |          |          |          |          |          |      |          |          |          |          |          |     |          |          |          |          |          |      |          |          |          |          |          |     |          |          |          |          |          |       |          |          |          |          |          |       |          |          |          |          |          |       |          |          |          |          |          |  |   |   |   |   |    |     |          |          |  |  |  |      |          |          |          |  |  |     |          |          |          |          |  |       |          |          |          |          |          |       |          |          |          |          |          |       |          |          |          |          |          |  |    |    |  |  |  |       |          |          |  |  |  |
| 11 B                                                                                                                            | 2.167809                                                                                                                                                                                                                                                                                                                                                                                                                                                                                                                                                                                                                                                                                                                                                                                                                                                                                                                                                                                                                                                                                                                                                                                                                                                                                                                                                                                                                                                                                                                                                                                                                                                                                                                                                                                                                                                                                                                                                                                                                                                                                                                                                                                                                                                                 | 2.971924 | 2.013877 | 3.098326 | 1.776495 |   |   |     |          |  |  |  |  |     |          |          |  |  |  |      |          |          |          |  |  |     |          |          |          |          |  |     |          |          |          |          |          |      |          |          |          |          |          |     |          |          |          |          |          |      |          |          |          |          |          |     |          |          |          |          |          |       |          |          |          |          |          |       |          |          |          |          |          |       |          |          |          |          |          |  |   |   |   |   |    |     |          |          |  |  |  |      |          |          |          |  |  |     |          |          |          |          |  |       |          |          |          |          |          |       |          |          |          |          |          |       |          |          |          |          |          |  |    |    |  |  |  |       |          |          |  |  |  |
| 12 B                                                                                                                            | 3.215358                                                                                                                                                                                                                                                                                                                                                                                                                                                                                                                                                                                                                                                                                                                                                                                                                                                                                                                                                                                                                                                                                                                                                                                                                                                                                                                                                                                                                                                                                                                                                                                                                                                                                                                                                                                                                                                                                                                                                                                                                                                                                                                                                                                                                                                                 | 1.757822 | 3.181180 | 1.750357 | 1.773048 |   |   |     |          |  |  |  |  |     |          |          |  |  |  |      |          |          |          |  |  |     |          |          |          |          |  |     |          |          |          |          |          |      |          |          |          |          |          |     |          |          |          |          |          |      |          |          |          |          |          |     |          |          |          |          |          |       |          |          |          |          |          |       |          |          |          |          |          |       |          |          |          |          |          |  |   |   |   |   |    |     |          |          |  |  |  |      |          |          |          |  |  |     |          |          |          |          |  |       |          |          |          |          |          |       |          |          |          |          |          |       |          |          |          |          |          |  |    |    |  |  |  |       |          |          |  |  |  |
|                                                                                                                                 | 11                                                                                                                                                                                                                                                                                                                                                                                                                                                                                                                                                                                                                                                                                                                                                                                                                                                                                                                                                                                                                                                                                                                                                                                                                                                                                                                                                                                                                                                                                                                                                                                                                                                                                                                                                                                                                                                                                                                                                                                                                                                                                                                                                                                                                                                                       | 12       |          |          |          |   |   |     |          |  |  |  |  |     |          |          |  |  |  |      |          |          |          |  |  |     |          |          |          |          |  |     |          |          |          |          |          |      |          |          |          |          |          |     |          |          |          |          |          |      |          |          |          |          |          |     |          |          |          |          |          |       |          |          |          |          |          |       |          |          |          |          |          |       |          |          |          |          |          |  |   |   |   |   |    |     |          |          |  |  |  |      |          |          |          |  |  |     |          |          |          |          |  |       |          |          |          |          |          |       |          |          |          |          |          |       |          |          |          |          |          |  |    |    |  |  |  |       |          |          |  |  |  |
| 12 B                                                                                                                            | 1.777108                                                                                                                                                                                                                                                                                                                                                                                                                                                                                                                                                                                                                                                                                                                                                                                                                                                                                                                                                                                                                                                                                                                                                                                                                                                                                                                                                                                                                                                                                                                                                                                                                                                                                                                                                                                                                                                                                                                                                                                                                                                                                                                                                                                                                                                                 | 0.000000 |          |          |          |   |   |     |          |  |  |  |  |     |          |          |  |  |  |      |          |          |          |  |  |     |          |          |          |          |  |     |          |          |          |          |          |      |          |          |          |          |          |     |          |          |          |          |          |      |          |          |          |          |          |     |          |          |          |          |          |       |          |          |          |          |          |       |          |          |          |          |          |       |          |          |          |          |          |  |   |   |   |   |    |     |          |          |  |  |  |      |          |          |          |  |  |     |          |          |          |          |  |       |          |          |          |          |          |       |          |          |          |          |          |       |          |          |          |          |          |  |    |    |  |  |  |       |          |          |  |  |  |
|  <p>2. -6608.2720732 +0.12 C<sub>1</sub></p> | <table border="1"> <thead> <tr> <th></th> <th>1</th> <th>2</th> <th>3</th> <th>4</th> <th>5</th> </tr> </thead> <tbody> <tr><td>1 B</td><td>0.000000</td><td></td><td></td><td></td><td></td></tr> <tr><td>2 B</td><td>2.845115</td><td>0.000000</td><td></td><td></td><td></td></tr> <tr><td>3 B</td><td>1.752899</td><td>1.778475</td><td>0.000000</td><td></td><td></td></tr> <tr><td>4 B</td><td>1.757045</td><td>1.773967</td><td>1.757193</td><td>0.000000</td><td></td></tr> <tr><td>5 B</td><td>3.467339</td><td>1.687907</td><td>2.868609</td><td>2.943062</td><td>0.000000</td></tr> <tr><td>6 B</td><td>2.940834</td><td>1.769151</td><td>1.745080</td><td>2.918111</td><td>1.844860</td></tr> <tr><td>7 B</td><td>2.891072</td><td>1.770616</td><td>2.897123</td><td>1.800023</td><td>1.917119</td></tr> <tr><td>8 B</td><td>1.758358</td><td>2.853337</td><td>1.730794</td><td>2.856890</td><td>2.964713</td></tr> <tr><td>9 B</td><td>1.799453</td><td>2.995762</td><td>2.955575</td><td>1.737074</td><td>3.320018</td></tr> <tr><td>10 Se</td><td>3.301450</td><td>3.126505</td><td>3.195590</td><td>3.810047</td><td>2.017464</td></tr> <tr><td>11 Co</td><td>2.133769</td><td>3.828500</td><td>3.354430</td><td>3.281428</td><td>3.425471</td></tr> <tr><td>12 Se</td><td>3.384943</td><td>3.608836</td><td>4.197087</td><td>3.262386</td><td>2.948831</td></tr> <tr> <td></td> <td>6</td> <td>7</td> <td>8</td> <td>9</td> <td>10</td> </tr> <tr><td>7 B</td><td>3.027549</td><td>0.000000</td><td></td><td></td><td></td></tr> <tr><td>8 B</td><td>1.862559</td><td>3.442647</td><td>0.000000</td><td></td><td></td></tr> <tr><td>9 B</td><td>3.753604</td><td>1.945698</td><td>3.104280</td><td>0.000000</td><td></td></tr> <tr><td>10 Se</td><td>2.078530</td><td>3.284260</td><td>2.111333</td><td>3.668633</td><td>0.000000</td></tr> <tr><td>11 Co</td><td>3.520120</td><td>3.245911</td><td>2.247778</td><td>2.220306</td><td>2.453693</td></tr> <tr><td>12 Se</td><td>4.160731</td><td>2.086810</td><td>3.889066</td><td>2.021691</td><td>3.246841</td></tr> <tr> <td></td> <td>11</td> <td>12</td> <td></td> <td></td> <td></td> </tr> <tr><td>12 Se</td><td>2.407464</td><td>0.000000</td><td></td><td></td><td></td></tr> </tbody> </table> |          | 1        | 2        | 3        | 4 | 5 | 1 B | 0.000000 |  |  |  |  | 2 B | 2.845115 | 0.000000 |  |  |  | 3 B  | 1.752899 | 1.778475 | 0.000000 |  |  | 4 B | 1.757045 | 1.773967 | 1.757193 | 0.000000 |  | 5 B | 3.467339 | 1.687907 | 2.868609 | 2.943062 | 0.000000 | 6 B  | 2.940834 | 1.769151 | 1.745080 | 2.918111 | 1.844860 | 7 B | 2.891072 | 1.770616 | 2.897123 | 1.800023 | 1.917119 | 8 B  | 1.758358 | 2.853337 | 1.730794 | 2.856890 | 2.964713 | 9 B | 1.799453 | 2.995762 | 2.955575 | 1.737074 | 3.320018 | 10 Se | 3.301450 | 3.126505 | 3.195590 | 3.810047 | 2.017464 | 11 Co | 2.133769 | 3.828500 | 3.354430 | 3.281428 | 3.425471 | 12 Se | 3.384943 | 3.608836 | 4.197087 | 3.262386 | 2.948831 |  | 6 | 7 | 8 | 9 | 10 | 7 B | 3.027549 | 0.000000 |  |  |  | 8 B  | 1.862559 | 3.442647 | 0.000000 |  |  | 9 B | 3.753604 | 1.945698 | 3.104280 | 0.000000 |  | 10 Se | 2.078530 | 3.284260 | 2.111333 | 3.668633 | 0.000000 | 11 Co | 3.520120 | 3.245911 | 2.247778 | 2.220306 | 2.453693 | 12 Se | 4.160731 | 2.086810 | 3.889066 | 2.021691 | 3.246841 |  | 11 | 12 |  |  |  | 12 Se | 2.407464 | 0.000000 |  |  |  |
|                                                                                                                                 | 1                                                                                                                                                                                                                                                                                                                                                                                                                                                                                                                                                                                                                                                                                                                                                                                                                                                                                                                                                                                                                                                                                                                                                                                                                                                                                                                                                                                                                                                                                                                                                                                                                                                                                                                                                                                                                                                                                                                                                                                                                                                                                                                                                                                                                                                                        | 2        | 3        | 4        | 5        |   |   |     |          |  |  |  |  |     |          |          |  |  |  |      |          |          |          |  |  |     |          |          |          |          |  |     |          |          |          |          |          |      |          |          |          |          |          |     |          |          |          |          |          |      |          |          |          |          |          |     |          |          |          |          |          |       |          |          |          |          |          |       |          |          |          |          |          |       |          |          |          |          |          |  |   |   |   |   |    |     |          |          |  |  |  |      |          |          |          |  |  |     |          |          |          |          |  |       |          |          |          |          |          |       |          |          |          |          |          |       |          |          |          |          |          |  |    |    |  |  |  |       |          |          |  |  |  |
| 1 B                                                                                                                             | 0.000000                                                                                                                                                                                                                                                                                                                                                                                                                                                                                                                                                                                                                                                                                                                                                                                                                                                                                                                                                                                                                                                                                                                                                                                                                                                                                                                                                                                                                                                                                                                                                                                                                                                                                                                                                                                                                                                                                                                                                                                                                                                                                                                                                                                                                                                                 |          |          |          |          |   |   |     |          |  |  |  |  |     |          |          |  |  |  |      |          |          |          |  |  |     |          |          |          |          |  |     |          |          |          |          |          |      |          |          |          |          |          |     |          |          |          |          |          |      |          |          |          |          |          |     |          |          |          |          |          |       |          |          |          |          |          |       |          |          |          |          |          |       |          |          |          |          |          |  |   |   |   |   |    |     |          |          |  |  |  |      |          |          |          |  |  |     |          |          |          |          |  |       |          |          |          |          |          |       |          |          |          |          |          |       |          |          |          |          |          |  |    |    |  |  |  |       |          |          |  |  |  |
| 2 B                                                                                                                             | 2.845115                                                                                                                                                                                                                                                                                                                                                                                                                                                                                                                                                                                                                                                                                                                                                                                                                                                                                                                                                                                                                                                                                                                                                                                                                                                                                                                                                                                                                                                                                                                                                                                                                                                                                                                                                                                                                                                                                                                                                                                                                                                                                                                                                                                                                                                                 | 0.000000 |          |          |          |   |   |     |          |  |  |  |  |     |          |          |  |  |  |      |          |          |          |  |  |     |          |          |          |          |  |     |          |          |          |          |          |      |          |          |          |          |          |     |          |          |          |          |          |      |          |          |          |          |          |     |          |          |          |          |          |       |          |          |          |          |          |       |          |          |          |          |          |       |          |          |          |          |          |  |   |   |   |   |    |     |          |          |  |  |  |      |          |          |          |  |  |     |          |          |          |          |  |       |          |          |          |          |          |       |          |          |          |          |          |       |          |          |          |          |          |  |    |    |  |  |  |       |          |          |  |  |  |
| 3 B                                                                                                                             | 1.752899                                                                                                                                                                                                                                                                                                                                                                                                                                                                                                                                                                                                                                                                                                                                                                                                                                                                                                                                                                                                                                                                                                                                                                                                                                                                                                                                                                                                                                                                                                                                                                                                                                                                                                                                                                                                                                                                                                                                                                                                                                                                                                                                                                                                                                                                 | 1.778475 | 0.000000 |          |          |   |   |     |          |  |  |  |  |     |          |          |  |  |  |      |          |          |          |  |  |     |          |          |          |          |  |     |          |          |          |          |          |      |          |          |          |          |          |     |          |          |          |          |          |      |          |          |          |          |          |     |          |          |          |          |          |       |          |          |          |          |          |       |          |          |          |          |          |       |          |          |          |          |          |  |   |   |   |   |    |     |          |          |  |  |  |      |          |          |          |  |  |     |          |          |          |          |  |       |          |          |          |          |          |       |          |          |          |          |          |       |          |          |          |          |          |  |    |    |  |  |  |       |          |          |  |  |  |
| 4 B                                                                                                                             | 1.757045                                                                                                                                                                                                                                                                                                                                                                                                                                                                                                                                                                                                                                                                                                                                                                                                                                                                                                                                                                                                                                                                                                                                                                                                                                                                                                                                                                                                                                                                                                                                                                                                                                                                                                                                                                                                                                                                                                                                                                                                                                                                                                                                                                                                                                                                 | 1.773967 | 1.757193 | 0.000000 |          |   |   |     |          |  |  |  |  |     |          |          |  |  |  |      |          |          |          |  |  |     |          |          |          |          |  |     |          |          |          |          |          |      |          |          |          |          |          |     |          |          |          |          |          |      |          |          |          |          |          |     |          |          |          |          |          |       |          |          |          |          |          |       |          |          |          |          |          |       |          |          |          |          |          |  |   |   |   |   |    |     |          |          |  |  |  |      |          |          |          |  |  |     |          |          |          |          |  |       |          |          |          |          |          |       |          |          |          |          |          |       |          |          |          |          |          |  |    |    |  |  |  |       |          |          |  |  |  |
| 5 B                                                                                                                             | 3.467339                                                                                                                                                                                                                                                                                                                                                                                                                                                                                                                                                                                                                                                                                                                                                                                                                                                                                                                                                                                                                                                                                                                                                                                                                                                                                                                                                                                                                                                                                                                                                                                                                                                                                                                                                                                                                                                                                                                                                                                                                                                                                                                                                                                                                                                                 | 1.687907 | 2.868609 | 2.943062 | 0.000000 |   |   |     |          |  |  |  |  |     |          |          |  |  |  |      |          |          |          |  |  |     |          |          |          |          |  |     |          |          |          |          |          |      |          |          |          |          |          |     |          |          |          |          |          |      |          |          |          |          |          |     |          |          |          |          |          |       |          |          |          |          |          |       |          |          |          |          |          |       |          |          |          |          |          |  |   |   |   |   |    |     |          |          |  |  |  |      |          |          |          |  |  |     |          |          |          |          |  |       |          |          |          |          |          |       |          |          |          |          |          |       |          |          |          |          |          |  |    |    |  |  |  |       |          |          |  |  |  |
| 6 B                                                                                                                             | 2.940834                                                                                                                                                                                                                                                                                                                                                                                                                                                                                                                                                                                                                                                                                                                                                                                                                                                                                                                                                                                                                                                                                                                                                                                                                                                                                                                                                                                                                                                                                                                                                                                                                                                                                                                                                                                                                                                                                                                                                                                                                                                                                                                                                                                                                                                                 | 1.769151 | 1.745080 | 2.918111 | 1.844860 |   |   |     |          |  |  |  |  |     |          |          |  |  |  |      |          |          |          |  |  |     |          |          |          |          |  |     |          |          |          |          |          |      |          |          |          |          |          |     |          |          |          |          |          |      |          |          |          |          |          |     |          |          |          |          |          |       |          |          |          |          |          |       |          |          |          |          |          |       |          |          |          |          |          |  |   |   |   |   |    |     |          |          |  |  |  |      |          |          |          |  |  |     |          |          |          |          |  |       |          |          |          |          |          |       |          |          |          |          |          |       |          |          |          |          |          |  |    |    |  |  |  |       |          |          |  |  |  |
| 7 B                                                                                                                             | 2.891072                                                                                                                                                                                                                                                                                                                                                                                                                                                                                                                                                                                                                                                                                                                                                                                                                                                                                                                                                                                                                                                                                                                                                                                                                                                                                                                                                                                                                                                                                                                                                                                                                                                                                                                                                                                                                                                                                                                                                                                                                                                                                                                                                                                                                                                                 | 1.770616 | 2.897123 | 1.800023 | 1.917119 |   |   |     |          |  |  |  |  |     |          |          |  |  |  |      |          |          |          |  |  |     |          |          |          |          |  |     |          |          |          |          |          |      |          |          |          |          |          |     |          |          |          |          |          |      |          |          |          |          |          |     |          |          |          |          |          |       |          |          |          |          |          |       |          |          |          |          |          |       |          |          |          |          |          |  |   |   |   |   |    |     |          |          |  |  |  |      |          |          |          |  |  |     |          |          |          |          |  |       |          |          |          |          |          |       |          |          |          |          |          |       |          |          |          |          |          |  |    |    |  |  |  |       |          |          |  |  |  |
| 8 B                                                                                                                             | 1.758358                                                                                                                                                                                                                                                                                                                                                                                                                                                                                                                                                                                                                                                                                                                                                                                                                                                                                                                                                                                                                                                                                                                                                                                                                                                                                                                                                                                                                                                                                                                                                                                                                                                                                                                                                                                                                                                                                                                                                                                                                                                                                                                                                                                                                                                                 | 2.853337 | 1.730794 | 2.856890 | 2.964713 |   |   |     |          |  |  |  |  |     |          |          |  |  |  |      |          |          |          |  |  |     |          |          |          |          |  |     |          |          |          |          |          |      |          |          |          |          |          |     |          |          |          |          |          |      |          |          |          |          |          |     |          |          |          |          |          |       |          |          |          |          |          |       |          |          |          |          |          |       |          |          |          |          |          |  |   |   |   |   |    |     |          |          |  |  |  |      |          |          |          |  |  |     |          |          |          |          |  |       |          |          |          |          |          |       |          |          |          |          |          |       |          |          |          |          |          |  |    |    |  |  |  |       |          |          |  |  |  |
| 9 B                                                                                                                             | 1.799453                                                                                                                                                                                                                                                                                                                                                                                                                                                                                                                                                                                                                                                                                                                                                                                                                                                                                                                                                                                                                                                                                                                                                                                                                                                                                                                                                                                                                                                                                                                                                                                                                                                                                                                                                                                                                                                                                                                                                                                                                                                                                                                                                                                                                                                                 | 2.995762 | 2.955575 | 1.737074 | 3.320018 |   |   |     |          |  |  |  |  |     |          |          |  |  |  |      |          |          |          |  |  |     |          |          |          |          |  |     |          |          |          |          |          |      |          |          |          |          |          |     |          |          |          |          |          |      |          |          |          |          |          |     |          |          |          |          |          |       |          |          |          |          |          |       |          |          |          |          |          |       |          |          |          |          |          |  |   |   |   |   |    |     |          |          |  |  |  |      |          |          |          |  |  |     |          |          |          |          |  |       |          |          |          |          |          |       |          |          |          |          |          |       |          |          |          |          |          |  |    |    |  |  |  |       |          |          |  |  |  |
| 10 Se                                                                                                                           | 3.301450                                                                                                                                                                                                                                                                                                                                                                                                                                                                                                                                                                                                                                                                                                                                                                                                                                                                                                                                                                                                                                                                                                                                                                                                                                                                                                                                                                                                                                                                                                                                                                                                                                                                                                                                                                                                                                                                                                                                                                                                                                                                                                                                                                                                                                                                 | 3.126505 | 3.195590 | 3.810047 | 2.017464 |   |   |     |          |  |  |  |  |     |          |          |  |  |  |      |          |          |          |  |  |     |          |          |          |          |  |     |          |          |          |          |          |      |          |          |          |          |          |     |          |          |          |          |          |      |          |          |          |          |          |     |          |          |          |          |          |       |          |          |          |          |          |       |          |          |          |          |          |       |          |          |          |          |          |  |   |   |   |   |    |     |          |          |  |  |  |      |          |          |          |  |  |     |          |          |          |          |  |       |          |          |          |          |          |       |          |          |          |          |          |       |          |          |          |          |          |  |    |    |  |  |  |       |          |          |  |  |  |
| 11 Co                                                                                                                           | 2.133769                                                                                                                                                                                                                                                                                                                                                                                                                                                                                                                                                                                                                                                                                                                                                                                                                                                                                                                                                                                                                                                                                                                                                                                                                                                                                                                                                                                                                                                                                                                                                                                                                                                                                                                                                                                                                                                                                                                                                                                                                                                                                                                                                                                                                                                                 | 3.828500 | 3.354430 | 3.281428 | 3.425471 |   |   |     |          |  |  |  |  |     |          |          |  |  |  |      |          |          |          |  |  |     |          |          |          |          |  |     |          |          |          |          |          |      |          |          |          |          |          |     |          |          |          |          |          |      |          |          |          |          |          |     |          |          |          |          |          |       |          |          |          |          |          |       |          |          |          |          |          |       |          |          |          |          |          |  |   |   |   |   |    |     |          |          |  |  |  |      |          |          |          |  |  |     |          |          |          |          |  |       |          |          |          |          |          |       |          |          |          |          |          |       |          |          |          |          |          |  |    |    |  |  |  |       |          |          |  |  |  |
| 12 Se                                                                                                                           | 3.384943                                                                                                                                                                                                                                                                                                                                                                                                                                                                                                                                                                                                                                                                                                                                                                                                                                                                                                                                                                                                                                                                                                                                                                                                                                                                                                                                                                                                                                                                                                                                                                                                                                                                                                                                                                                                                                                                                                                                                                                                                                                                                                                                                                                                                                                                 | 3.608836 | 4.197087 | 3.262386 | 2.948831 |   |   |     |          |  |  |  |  |     |          |          |  |  |  |      |          |          |          |  |  |     |          |          |          |          |  |     |          |          |          |          |          |      |          |          |          |          |          |     |          |          |          |          |          |      |          |          |          |          |          |     |          |          |          |          |          |       |          |          |          |          |          |       |          |          |          |          |          |       |          |          |          |          |          |  |   |   |   |   |    |     |          |          |  |  |  |      |          |          |          |  |  |     |          |          |          |          |  |       |          |          |          |          |          |       |          |          |          |          |          |       |          |          |          |          |          |  |    |    |  |  |  |       |          |          |  |  |  |
|                                                                                                                                 | 6                                                                                                                                                                                                                                                                                                                                                                                                                                                                                                                                                                                                                                                                                                                                                                                                                                                                                                                                                                                                                                                                                                                                                                                                                                                                                                                                                                                                                                                                                                                                                                                                                                                                                                                                                                                                                                                                                                                                                                                                                                                                                                                                                                                                                                                                        | 7        | 8        | 9        | 10       |   |   |     |          |  |  |  |  |     |          |          |  |  |  |      |          |          |          |  |  |     |          |          |          |          |  |     |          |          |          |          |          |      |          |          |          |          |          |     |          |          |          |          |          |      |          |          |          |          |          |     |          |          |          |          |          |       |          |          |          |          |          |       |          |          |          |          |          |       |          |          |          |          |          |  |   |   |   |   |    |     |          |          |  |  |  |      |          |          |          |  |  |     |          |          |          |          |  |       |          |          |          |          |          |       |          |          |          |          |          |       |          |          |          |          |          |  |    |    |  |  |  |       |          |          |  |  |  |
| 7 B                                                                                                                             | 3.027549                                                                                                                                                                                                                                                                                                                                                                                                                                                                                                                                                                                                                                                                                                                                                                                                                                                                                                                                                                                                                                                                                                                                                                                                                                                                                                                                                                                                                                                                                                                                                                                                                                                                                                                                                                                                                                                                                                                                                                                                                                                                                                                                                                                                                                                                 | 0.000000 |          |          |          |   |   |     |          |  |  |  |  |     |          |          |  |  |  |      |          |          |          |  |  |     |          |          |          |          |  |     |          |          |          |          |          |      |          |          |          |          |          |     |          |          |          |          |          |      |          |          |          |          |          |     |          |          |          |          |          |       |          |          |          |          |          |       |          |          |          |          |          |       |          |          |          |          |          |  |   |   |   |   |    |     |          |          |  |  |  |      |          |          |          |  |  |     |          |          |          |          |  |       |          |          |          |          |          |       |          |          |          |          |          |       |          |          |          |          |          |  |    |    |  |  |  |       |          |          |  |  |  |
| 8 B                                                                                                                             | 1.862559                                                                                                                                                                                                                                                                                                                                                                                                                                                                                                                                                                                                                                                                                                                                                                                                                                                                                                                                                                                                                                                                                                                                                                                                                                                                                                                                                                                                                                                                                                                                                                                                                                                                                                                                                                                                                                                                                                                                                                                                                                                                                                                                                                                                                                                                 | 3.442647 | 0.000000 |          |          |   |   |     |          |  |  |  |  |     |          |          |  |  |  |      |          |          |          |  |  |     |          |          |          |          |  |     |          |          |          |          |          |      |          |          |          |          |          |     |          |          |          |          |          |      |          |          |          |          |          |     |          |          |          |          |          |       |          |          |          |          |          |       |          |          |          |          |          |       |          |          |          |          |          |  |   |   |   |   |    |     |          |          |  |  |  |      |          |          |          |  |  |     |          |          |          |          |  |       |          |          |          |          |          |       |          |          |          |          |          |       |          |          |          |          |          |  |    |    |  |  |  |       |          |          |  |  |  |
| 9 B                                                                                                                             | 3.753604                                                                                                                                                                                                                                                                                                                                                                                                                                                                                                                                                                                                                                                                                                                                                                                                                                                                                                                                                                                                                                                                                                                                                                                                                                                                                                                                                                                                                                                                                                                                                                                                                                                                                                                                                                                                                                                                                                                                                                                                                                                                                                                                                                                                                                                                 | 1.945698 | 3.104280 | 0.000000 |          |   |   |     |          |  |  |  |  |     |          |          |  |  |  |      |          |          |          |  |  |     |          |          |          |          |  |     |          |          |          |          |          |      |          |          |          |          |          |     |          |          |          |          |          |      |          |          |          |          |          |     |          |          |          |          |          |       |          |          |          |          |          |       |          |          |          |          |          |       |          |          |          |          |          |  |   |   |   |   |    |     |          |          |  |  |  |      |          |          |          |  |  |     |          |          |          |          |  |       |          |          |          |          |          |       |          |          |          |          |          |       |          |          |          |          |          |  |    |    |  |  |  |       |          |          |  |  |  |
| 10 Se                                                                                                                           | 2.078530                                                                                                                                                                                                                                                                                                                                                                                                                                                                                                                                                                                                                                                                                                                                                                                                                                                                                                                                                                                                                                                                                                                                                                                                                                                                                                                                                                                                                                                                                                                                                                                                                                                                                                                                                                                                                                                                                                                                                                                                                                                                                                                                                                                                                                                                 | 3.284260 | 2.111333 | 3.668633 | 0.000000 |   |   |     |          |  |  |  |  |     |          |          |  |  |  |      |          |          |          |  |  |     |          |          |          |          |  |     |          |          |          |          |          |      |          |          |          |          |          |     |          |          |          |          |          |      |          |          |          |          |          |     |          |          |          |          |          |       |          |          |          |          |          |       |          |          |          |          |          |       |          |          |          |          |          |  |   |   |   |   |    |     |          |          |  |  |  |      |          |          |          |  |  |     |          |          |          |          |  |       |          |          |          |          |          |       |          |          |          |          |          |       |          |          |          |          |          |  |    |    |  |  |  |       |          |          |  |  |  |
| 11 Co                                                                                                                           | 3.520120                                                                                                                                                                                                                                                                                                                                                                                                                                                                                                                                                                                                                                                                                                                                                                                                                                                                                                                                                                                                                                                                                                                                                                                                                                                                                                                                                                                                                                                                                                                                                                                                                                                                                                                                                                                                                                                                                                                                                                                                                                                                                                                                                                                                                                                                 | 3.245911 | 2.247778 | 2.220306 | 2.453693 |   |   |     |          |  |  |  |  |     |          |          |  |  |  |      |          |          |          |  |  |     |          |          |          |          |  |     |          |          |          |          |          |      |          |          |          |          |          |     |          |          |          |          |          |      |          |          |          |          |          |     |          |          |          |          |          |       |          |          |          |          |          |       |          |          |          |          |          |       |          |          |          |          |          |  |   |   |   |   |    |     |          |          |  |  |  |      |          |          |          |  |  |     |          |          |          |          |  |       |          |          |          |          |          |       |          |          |          |          |          |       |          |          |          |          |          |  |    |    |  |  |  |       |          |          |  |  |  |
| 12 Se                                                                                                                           | 4.160731                                                                                                                                                                                                                                                                                                                                                                                                                                                                                                                                                                                                                                                                                                                                                                                                                                                                                                                                                                                                                                                                                                                                                                                                                                                                                                                                                                                                                                                                                                                                                                                                                                                                                                                                                                                                                                                                                                                                                                                                                                                                                                                                                                                                                                                                 | 2.086810 | 3.889066 | 2.021691 | 3.246841 |   |   |     |          |  |  |  |  |     |          |          |  |  |  |      |          |          |          |  |  |     |          |          |          |          |  |     |          |          |          |          |          |      |          |          |          |          |          |     |          |          |          |          |          |      |          |          |          |          |          |     |          |          |          |          |          |       |          |          |          |          |          |       |          |          |          |          |          |       |          |          |          |          |          |  |   |   |   |   |    |     |          |          |  |  |  |      |          |          |          |  |  |     |          |          |          |          |  |       |          |          |          |          |          |       |          |          |          |          |          |       |          |          |          |          |          |  |    |    |  |  |  |       |          |          |  |  |  |
|                                                                                                                                 | 11                                                                                                                                                                                                                                                                                                                                                                                                                                                                                                                                                                                                                                                                                                                                                                                                                                                                                                                                                                                                                                                                                                                                                                                                                                                                                                                                                                                                                                                                                                                                                                                                                                                                                                                                                                                                                                                                                                                                                                                                                                                                                                                                                                                                                                                                       | 12       |          |          |          |   |   |     |          |  |  |  |  |     |          |          |  |  |  |      |          |          |          |  |  |     |          |          |          |          |  |     |          |          |          |          |          |      |          |          |          |          |          |     |          |          |          |          |          |      |          |          |          |          |          |     |          |          |          |          |          |       |          |          |          |          |          |       |          |          |          |          |          |       |          |          |          |          |          |  |   |   |   |   |    |     |          |          |  |  |  |      |          |          |          |  |  |     |          |          |          |          |  |       |          |          |          |          |          |       |          |          |          |          |          |       |          |          |          |          |          |  |    |    |  |  |  |       |          |          |  |  |  |
| 12 Se                                                                                                                           | 2.407464                                                                                                                                                                                                                                                                                                                                                                                                                                                                                                                                                                                                                                                                                                                                                                                                                                                                                                                                                                                                                                                                                                                                                                                                                                                                                                                                                                                                                                                                                                                                                                                                                                                                                                                                                                                                                                                                                                                                                                                                                                                                                                                                                                                                                                                                 | 0.000000 |          |          |          |   |   |     |          |  |  |  |  |     |          |          |  |  |  |      |          |          |          |  |  |     |          |          |          |          |  |     |          |          |          |          |          |      |          |          |          |          |          |     |          |          |          |          |          |      |          |          |          |          |          |     |          |          |          |          |          |       |          |          |          |          |          |       |          |          |          |          |          |       |          |          |          |          |          |  |   |   |   |   |    |     |          |          |  |  |  |      |          |          |          |  |  |     |          |          |          |          |  |       |          |          |          |          |          |       |          |          |          |          |          |       |          |          |          |          |          |  |    |    |  |  |  |       |          |          |  |  |  |



| 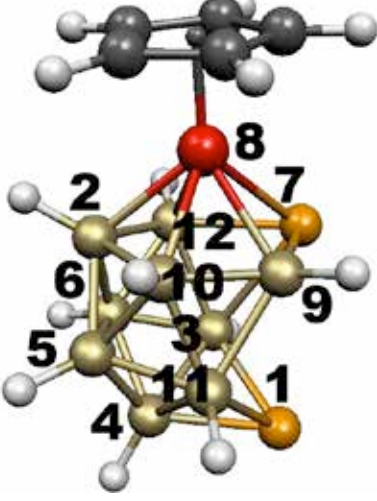 <p>3. -6608.2710100 +0.8 C<sub>1</sub></p>   | <table border="1"> <thead> <tr> <th></th> <th>1</th> <th>2</th> <th>3</th> <th>4</th> <th>5</th> </tr> </thead> <tbody> <tr><td>1 Se</td><td>0.000000</td><td></td><td></td><td></td><td></td></tr> <tr><td>2 B</td><td>4.107631</td><td>0.000000</td><td></td><td></td><td></td></tr> <tr><td>3 B</td><td>2.080878</td><td>2.967447</td><td>0.000000</td><td></td><td></td></tr> <tr><td>4 B</td><td>2.010934</td><td>2.932617</td><td>1.939621</td><td>0.000000</td><td></td></tr> <tr><td>5 B</td><td>3.249975</td><td>1.735146</td><td>2.874433</td><td>1.728873</td><td>0.000000</td></tr> <tr><td>6 B</td><td>3.220364</td><td>1.764349</td><td>1.760634</td><td>1.762346</td><td>1.776461</td></tr> <tr><td>7 Se</td><td>3.156556</td><td>3.255696</td><td>2.372302</td><td>3.757254</td><td>3.871183</td></tr> <tr><td>8 Co</td><td>4.501850</td><td>2.080854</td><td>3.593881</td><td>4.230935</td><td>3.336127</td></tr> <tr><td>9 B</td><td>2.935086</td><td>2.900955</td><td>3.094892</td><td>3.366650</td><td>2.979472</td></tr> <tr><td>10 B</td><td>3.580242</td><td>1.776097</td><td>3.386047</td><td>2.982719</td><td>1.762505</td></tr> <tr><td>11 B</td><td>2.088152</td><td>2.892267</td><td>2.814033</td><td>1.919497</td><td>1.808328</td></tr> <tr><td>12 B</td><td>3.663241</td><td>1.787747</td><td>1.939151</td><td>3.080676</td><td>2.864849</td></tr> <tr> <th></th> <th>6</th> <th>7</th> <th>8</th> <th>9</th> <th>10</th> </tr> <tr><td>6 B</td><td>0.000000</td><td></td><td></td><td></td><td></td></tr> <tr><td>7 Se</td><td>3.327179</td><td>0.000000</td><td></td><td></td><td></td></tr> <tr><td>8 Co</td><td>3.347551</td><td>2.293408</td><td>0.000000</td><td></td><td></td></tr> <tr><td>9 B</td><td>3.465684</td><td>2.013647</td><td>2.126393</td><td>0.000000</td><td></td></tr> <tr><td>10 B</td><td>2.834511</td><td>3.149115</td><td>2.094730</td><td>1.710954</td><td>0.000000</td></tr> <tr><td>11 B</td><td>2.844764</td><td>3.304102</td><td>3.453033</td><td>1.952219</td><td>1.786504</td></tr> <tr><td>12 B</td><td>1.757334</td><td>2.072067</td><td>2.146742</td><td>2.911924</td><td>2.831002</td></tr> <tr> <th></th> <th>11</th> <th>12</th> <th colspan="3"></th> </tr> <tr><td>12 B</td><td>3.375572</td><td>0.000000</td><td colspan="3"></td></tr> </tbody> </table> |          | 1        | 2        | 3        | 4 | 5 | 1 Se | 0.000000 |  |  |  |  | 2 B | 4.107631 | 0.000000 |  |  |  | 3 B  | 2.080878 | 2.967447 | 0.000000 |  |  | 4 B | 2.010934 | 2.932617 | 1.939621 | 0.000000 |  | 5 B | 3.249975 | 1.735146 | 2.874433 | 1.728873 | 0.000000 | 6 B  | 3.220364 | 1.764349 | 1.760634 | 1.762346 | 1.776461 | 7 Se | 3.156556 | 3.255696 | 2.372302 | 3.757254 | 3.871183 | 8 Co | 4.501850 | 2.080854 | 3.593881 | 4.230935 | 3.336127 | 9 B | 2.935086 | 2.900955 | 3.094892 | 3.366650 | 2.979472 | 10 B | 3.580242 | 1.776097 | 3.386047 | 2.982719 | 1.762505 | 11 B | 2.088152 | 2.892267 | 2.814033 | 1.919497 | 1.808328 | 12 B | 3.663241 | 1.787747 | 1.939151 | 3.080676 | 2.864849 |  | 6 | 7 | 8 | 9 | 10 | 6 B  | 0.000000 |  |  |  |  | 7 Se | 3.327179 | 0.000000 |  |  |  | 8 Co | 3.347551 | 2.293408 | 0.000000 |  |  | 9 B | 3.465684 | 2.013647 | 2.126393 | 0.000000 |  | 10 B | 2.834511 | 3.149115 | 2.094730 | 1.710954 | 0.000000 | 11 B | 2.844764 | 3.304102 | 3.453033 | 1.952219 | 1.786504 | 12 B | 1.757334 | 2.072067 | 2.146742 | 2.911924 | 2.831002 |  | 11 | 12 |  |  |  | 12 B | 3.375572 | 0.000000 |  |  |  |
|--------------------------------------------------------------------------------------------------------------------------------|-------------------------------------------------------------------------------------------------------------------------------------------------------------------------------------------------------------------------------------------------------------------------------------------------------------------------------------------------------------------------------------------------------------------------------------------------------------------------------------------------------------------------------------------------------------------------------------------------------------------------------------------------------------------------------------------------------------------------------------------------------------------------------------------------------------------------------------------------------------------------------------------------------------------------------------------------------------------------------------------------------------------------------------------------------------------------------------------------------------------------------------------------------------------------------------------------------------------------------------------------------------------------------------------------------------------------------------------------------------------------------------------------------------------------------------------------------------------------------------------------------------------------------------------------------------------------------------------------------------------------------------------------------------------------------------------------------------------------------------------------------------------------------------------------------------------------------------------------------------------------------------------------------------------------------------------------------------------------------------------------------------------------------------------------------------------------------------------------------------------------------------------------------------------------------------------------------------------------------------------------------------------------------------------------------------------------------------|----------|----------|----------|----------|---|---|------|----------|--|--|--|--|-----|----------|----------|--|--|--|------|----------|----------|----------|--|--|-----|----------|----------|----------|----------|--|-----|----------|----------|----------|----------|----------|------|----------|----------|----------|----------|----------|------|----------|----------|----------|----------|----------|------|----------|----------|----------|----------|----------|-----|----------|----------|----------|----------|----------|------|----------|----------|----------|----------|----------|------|----------|----------|----------|----------|----------|------|----------|----------|----------|----------|----------|--|---|---|---|---|----|------|----------|--|--|--|--|------|----------|----------|--|--|--|------|----------|----------|----------|--|--|-----|----------|----------|----------|----------|--|------|----------|----------|----------|----------|----------|------|----------|----------|----------|----------|----------|------|----------|----------|----------|----------|----------|--|----|----|--|--|--|------|----------|----------|--|--|--|
|                                                                                                                                | 1                                                                                                                                                                                                                                                                                                                                                                                                                                                                                                                                                                                                                                                                                                                                                                                                                                                                                                                                                                                                                                                                                                                                                                                                                                                                                                                                                                                                                                                                                                                                                                                                                                                                                                                                                                                                                                                                                                                                                                                                                                                                                                                                                                                                                                                                                                                                   | 2        | 3        | 4        | 5        |   |   |      |          |  |  |  |  |     |          |          |  |  |  |      |          |          |          |  |  |     |          |          |          |          |  |     |          |          |          |          |          |      |          |          |          |          |          |      |          |          |          |          |          |      |          |          |          |          |          |     |          |          |          |          |          |      |          |          |          |          |          |      |          |          |          |          |          |      |          |          |          |          |          |  |   |   |   |   |    |      |          |  |  |  |  |      |          |          |  |  |  |      |          |          |          |  |  |     |          |          |          |          |  |      |          |          |          |          |          |      |          |          |          |          |          |      |          |          |          |          |          |  |    |    |  |  |  |      |          |          |  |  |  |
| 1 Se                                                                                                                           | 0.000000                                                                                                                                                                                                                                                                                                                                                                                                                                                                                                                                                                                                                                                                                                                                                                                                                                                                                                                                                                                                                                                                                                                                                                                                                                                                                                                                                                                                                                                                                                                                                                                                                                                                                                                                                                                                                                                                                                                                                                                                                                                                                                                                                                                                                                                                                                                            |          |          |          |          |   |   |      |          |  |  |  |  |     |          |          |  |  |  |      |          |          |          |  |  |     |          |          |          |          |  |     |          |          |          |          |          |      |          |          |          |          |          |      |          |          |          |          |          |      |          |          |          |          |          |     |          |          |          |          |          |      |          |          |          |          |          |      |          |          |          |          |          |      |          |          |          |          |          |  |   |   |   |   |    |      |          |  |  |  |  |      |          |          |  |  |  |      |          |          |          |  |  |     |          |          |          |          |  |      |          |          |          |          |          |      |          |          |          |          |          |      |          |          |          |          |          |  |    |    |  |  |  |      |          |          |  |  |  |
| 2 B                                                                                                                            | 4.107631                                                                                                                                                                                                                                                                                                                                                                                                                                                                                                                                                                                                                                                                                                                                                                                                                                                                                                                                                                                                                                                                                                                                                                                                                                                                                                                                                                                                                                                                                                                                                                                                                                                                                                                                                                                                                                                                                                                                                                                                                                                                                                                                                                                                                                                                                                                            | 0.000000 |          |          |          |   |   |      |          |  |  |  |  |     |          |          |  |  |  |      |          |          |          |  |  |     |          |          |          |          |  |     |          |          |          |          |          |      |          |          |          |          |          |      |          |          |          |          |          |      |          |          |          |          |          |     |          |          |          |          |          |      |          |          |          |          |          |      |          |          |          |          |          |      |          |          |          |          |          |  |   |   |   |   |    |      |          |  |  |  |  |      |          |          |  |  |  |      |          |          |          |  |  |     |          |          |          |          |  |      |          |          |          |          |          |      |          |          |          |          |          |      |          |          |          |          |          |  |    |    |  |  |  |      |          |          |  |  |  |
| 3 B                                                                                                                            | 2.080878                                                                                                                                                                                                                                                                                                                                                                                                                                                                                                                                                                                                                                                                                                                                                                                                                                                                                                                                                                                                                                                                                                                                                                                                                                                                                                                                                                                                                                                                                                                                                                                                                                                                                                                                                                                                                                                                                                                                                                                                                                                                                                                                                                                                                                                                                                                            | 2.967447 | 0.000000 |          |          |   |   |      |          |  |  |  |  |     |          |          |  |  |  |      |          |          |          |  |  |     |          |          |          |          |  |     |          |          |          |          |          |      |          |          |          |          |          |      |          |          |          |          |          |      |          |          |          |          |          |     |          |          |          |          |          |      |          |          |          |          |          |      |          |          |          |          |          |      |          |          |          |          |          |  |   |   |   |   |    |      |          |  |  |  |  |      |          |          |  |  |  |      |          |          |          |  |  |     |          |          |          |          |  |      |          |          |          |          |          |      |          |          |          |          |          |      |          |          |          |          |          |  |    |    |  |  |  |      |          |          |  |  |  |
| 4 B                                                                                                                            | 2.010934                                                                                                                                                                                                                                                                                                                                                                                                                                                                                                                                                                                                                                                                                                                                                                                                                                                                                                                                                                                                                                                                                                                                                                                                                                                                                                                                                                                                                                                                                                                                                                                                                                                                                                                                                                                                                                                                                                                                                                                                                                                                                                                                                                                                                                                                                                                            | 2.932617 | 1.939621 | 0.000000 |          |   |   |      |          |  |  |  |  |     |          |          |  |  |  |      |          |          |          |  |  |     |          |          |          |          |  |     |          |          |          |          |          |      |          |          |          |          |          |      |          |          |          |          |          |      |          |          |          |          |          |     |          |          |          |          |          |      |          |          |          |          |          |      |          |          |          |          |          |      |          |          |          |          |          |  |   |   |   |   |    |      |          |  |  |  |  |      |          |          |  |  |  |      |          |          |          |  |  |     |          |          |          |          |  |      |          |          |          |          |          |      |          |          |          |          |          |      |          |          |          |          |          |  |    |    |  |  |  |      |          |          |  |  |  |
| 5 B                                                                                                                            | 3.249975                                                                                                                                                                                                                                                                                                                                                                                                                                                                                                                                                                                                                                                                                                                                                                                                                                                                                                                                                                                                                                                                                                                                                                                                                                                                                                                                                                                                                                                                                                                                                                                                                                                                                                                                                                                                                                                                                                                                                                                                                                                                                                                                                                                                                                                                                                                            | 1.735146 | 2.874433 | 1.728873 | 0.000000 |   |   |      |          |  |  |  |  |     |          |          |  |  |  |      |          |          |          |  |  |     |          |          |          |          |  |     |          |          |          |          |          |      |          |          |          |          |          |      |          |          |          |          |          |      |          |          |          |          |          |     |          |          |          |          |          |      |          |          |          |          |          |      |          |          |          |          |          |      |          |          |          |          |          |  |   |   |   |   |    |      |          |  |  |  |  |      |          |          |  |  |  |      |          |          |          |  |  |     |          |          |          |          |  |      |          |          |          |          |          |      |          |          |          |          |          |      |          |          |          |          |          |  |    |    |  |  |  |      |          |          |  |  |  |
| 6 B                                                                                                                            | 3.220364                                                                                                                                                                                                                                                                                                                                                                                                                                                                                                                                                                                                                                                                                                                                                                                                                                                                                                                                                                                                                                                                                                                                                                                                                                                                                                                                                                                                                                                                                                                                                                                                                                                                                                                                                                                                                                                                                                                                                                                                                                                                                                                                                                                                                                                                                                                            | 1.764349 | 1.760634 | 1.762346 | 1.776461 |   |   |      |          |  |  |  |  |     |          |          |  |  |  |      |          |          |          |  |  |     |          |          |          |          |  |     |          |          |          |          |          |      |          |          |          |          |          |      |          |          |          |          |          |      |          |          |          |          |          |     |          |          |          |          |          |      |          |          |          |          |          |      |          |          |          |          |          |      |          |          |          |          |          |  |   |   |   |   |    |      |          |  |  |  |  |      |          |          |  |  |  |      |          |          |          |  |  |     |          |          |          |          |  |      |          |          |          |          |          |      |          |          |          |          |          |      |          |          |          |          |          |  |    |    |  |  |  |      |          |          |  |  |  |
| 7 Se                                                                                                                           | 3.156556                                                                                                                                                                                                                                                                                                                                                                                                                                                                                                                                                                                                                                                                                                                                                                                                                                                                                                                                                                                                                                                                                                                                                                                                                                                                                                                                                                                                                                                                                                                                                                                                                                                                                                                                                                                                                                                                                                                                                                                                                                                                                                                                                                                                                                                                                                                            | 3.255696 | 2.372302 | 3.757254 | 3.871183 |   |   |      |          |  |  |  |  |     |          |          |  |  |  |      |          |          |          |  |  |     |          |          |          |          |  |     |          |          |          |          |          |      |          |          |          |          |          |      |          |          |          |          |          |      |          |          |          |          |          |     |          |          |          |          |          |      |          |          |          |          |          |      |          |          |          |          |          |      |          |          |          |          |          |  |   |   |   |   |    |      |          |  |  |  |  |      |          |          |  |  |  |      |          |          |          |  |  |     |          |          |          |          |  |      |          |          |          |          |          |      |          |          |          |          |          |      |          |          |          |          |          |  |    |    |  |  |  |      |          |          |  |  |  |
| 8 Co                                                                                                                           | 4.501850                                                                                                                                                                                                                                                                                                                                                                                                                                                                                                                                                                                                                                                                                                                                                                                                                                                                                                                                                                                                                                                                                                                                                                                                                                                                                                                                                                                                                                                                                                                                                                                                                                                                                                                                                                                                                                                                                                                                                                                                                                                                                                                                                                                                                                                                                                                            | 2.080854 | 3.593881 | 4.230935 | 3.336127 |   |   |      |          |  |  |  |  |     |          |          |  |  |  |      |          |          |          |  |  |     |          |          |          |          |  |     |          |          |          |          |          |      |          |          |          |          |          |      |          |          |          |          |          |      |          |          |          |          |          |     |          |          |          |          |          |      |          |          |          |          |          |      |          |          |          |          |          |      |          |          |          |          |          |  |   |   |   |   |    |      |          |  |  |  |  |      |          |          |  |  |  |      |          |          |          |  |  |     |          |          |          |          |  |      |          |          |          |          |          |      |          |          |          |          |          |      |          |          |          |          |          |  |    |    |  |  |  |      |          |          |  |  |  |
| 9 B                                                                                                                            | 2.935086                                                                                                                                                                                                                                                                                                                                                                                                                                                                                                                                                                                                                                                                                                                                                                                                                                                                                                                                                                                                                                                                                                                                                                                                                                                                                                                                                                                                                                                                                                                                                                                                                                                                                                                                                                                                                                                                                                                                                                                                                                                                                                                                                                                                                                                                                                                            | 2.900955 | 3.094892 | 3.366650 | 2.979472 |   |   |      |          |  |  |  |  |     |          |          |  |  |  |      |          |          |          |  |  |     |          |          |          |          |  |     |          |          |          |          |          |      |          |          |          |          |          |      |          |          |          |          |          |      |          |          |          |          |          |     |          |          |          |          |          |      |          |          |          |          |          |      |          |          |          |          |          |      |          |          |          |          |          |  |   |   |   |   |    |      |          |  |  |  |  |      |          |          |  |  |  |      |          |          |          |  |  |     |          |          |          |          |  |      |          |          |          |          |          |      |          |          |          |          |          |      |          |          |          |          |          |  |    |    |  |  |  |      |          |          |  |  |  |
| 10 B                                                                                                                           | 3.580242                                                                                                                                                                                                                                                                                                                                                                                                                                                                                                                                                                                                                                                                                                                                                                                                                                                                                                                                                                                                                                                                                                                                                                                                                                                                                                                                                                                                                                                                                                                                                                                                                                                                                                                                                                                                                                                                                                                                                                                                                                                                                                                                                                                                                                                                                                                            | 1.776097 | 3.386047 | 2.982719 | 1.762505 |   |   |      |          |  |  |  |  |     |          |          |  |  |  |      |          |          |          |  |  |     |          |          |          |          |  |     |          |          |          |          |          |      |          |          |          |          |          |      |          |          |          |          |          |      |          |          |          |          |          |     |          |          |          |          |          |      |          |          |          |          |          |      |          |          |          |          |          |      |          |          |          |          |          |  |   |   |   |   |    |      |          |  |  |  |  |      |          |          |  |  |  |      |          |          |          |  |  |     |          |          |          |          |  |      |          |          |          |          |          |      |          |          |          |          |          |      |          |          |          |          |          |  |    |    |  |  |  |      |          |          |  |  |  |
| 11 B                                                                                                                           | 2.088152                                                                                                                                                                                                                                                                                                                                                                                                                                                                                                                                                                                                                                                                                                                                                                                                                                                                                                                                                                                                                                                                                                                                                                                                                                                                                                                                                                                                                                                                                                                                                                                                                                                                                                                                                                                                                                                                                                                                                                                                                                                                                                                                                                                                                                                                                                                            | 2.892267 | 2.814033 | 1.919497 | 1.808328 |   |   |      |          |  |  |  |  |     |          |          |  |  |  |      |          |          |          |  |  |     |          |          |          |          |  |     |          |          |          |          |          |      |          |          |          |          |          |      |          |          |          |          |          |      |          |          |          |          |          |     |          |          |          |          |          |      |          |          |          |          |          |      |          |          |          |          |          |      |          |          |          |          |          |  |   |   |   |   |    |      |          |  |  |  |  |      |          |          |  |  |  |      |          |          |          |  |  |     |          |          |          |          |  |      |          |          |          |          |          |      |          |          |          |          |          |      |          |          |          |          |          |  |    |    |  |  |  |      |          |          |  |  |  |
| 12 B                                                                                                                           | 3.663241                                                                                                                                                                                                                                                                                                                                                                                                                                                                                                                                                                                                                                                                                                                                                                                                                                                                                                                                                                                                                                                                                                                                                                                                                                                                                                                                                                                                                                                                                                                                                                                                                                                                                                                                                                                                                                                                                                                                                                                                                                                                                                                                                                                                                                                                                                                            | 1.787747 | 1.939151 | 3.080676 | 2.864849 |   |   |      |          |  |  |  |  |     |          |          |  |  |  |      |          |          |          |  |  |     |          |          |          |          |  |     |          |          |          |          |          |      |          |          |          |          |          |      |          |          |          |          |          |      |          |          |          |          |          |     |          |          |          |          |          |      |          |          |          |          |          |      |          |          |          |          |          |      |          |          |          |          |          |  |   |   |   |   |    |      |          |  |  |  |  |      |          |          |  |  |  |      |          |          |          |  |  |     |          |          |          |          |  |      |          |          |          |          |          |      |          |          |          |          |          |      |          |          |          |          |          |  |    |    |  |  |  |      |          |          |  |  |  |
|                                                                                                                                | 6                                                                                                                                                                                                                                                                                                                                                                                                                                                                                                                                                                                                                                                                                                                                                                                                                                                                                                                                                                                                                                                                                                                                                                                                                                                                                                                                                                                                                                                                                                                                                                                                                                                                                                                                                                                                                                                                                                                                                                                                                                                                                                                                                                                                                                                                                                                                   | 7        | 8        | 9        | 10       |   |   |      |          |  |  |  |  |     |          |          |  |  |  |      |          |          |          |  |  |     |          |          |          |          |  |     |          |          |          |          |          |      |          |          |          |          |          |      |          |          |          |          |          |      |          |          |          |          |          |     |          |          |          |          |          |      |          |          |          |          |          |      |          |          |          |          |          |      |          |          |          |          |          |  |   |   |   |   |    |      |          |  |  |  |  |      |          |          |  |  |  |      |          |          |          |  |  |     |          |          |          |          |  |      |          |          |          |          |          |      |          |          |          |          |          |      |          |          |          |          |          |  |    |    |  |  |  |      |          |          |  |  |  |
| 6 B                                                                                                                            | 0.000000                                                                                                                                                                                                                                                                                                                                                                                                                                                                                                                                                                                                                                                                                                                                                                                                                                                                                                                                                                                                                                                                                                                                                                                                                                                                                                                                                                                                                                                                                                                                                                                                                                                                                                                                                                                                                                                                                                                                                                                                                                                                                                                                                                                                                                                                                                                            |          |          |          |          |   |   |      |          |  |  |  |  |     |          |          |  |  |  |      |          |          |          |  |  |     |          |          |          |          |  |     |          |          |          |          |          |      |          |          |          |          |          |      |          |          |          |          |          |      |          |          |          |          |          |     |          |          |          |          |          |      |          |          |          |          |          |      |          |          |          |          |          |      |          |          |          |          |          |  |   |   |   |   |    |      |          |  |  |  |  |      |          |          |  |  |  |      |          |          |          |  |  |     |          |          |          |          |  |      |          |          |          |          |          |      |          |          |          |          |          |      |          |          |          |          |          |  |    |    |  |  |  |      |          |          |  |  |  |
| 7 Se                                                                                                                           | 3.327179                                                                                                                                                                                                                                                                                                                                                                                                                                                                                                                                                                                                                                                                                                                                                                                                                                                                                                                                                                                                                                                                                                                                                                                                                                                                                                                                                                                                                                                                                                                                                                                                                                                                                                                                                                                                                                                                                                                                                                                                                                                                                                                                                                                                                                                                                                                            | 0.000000 |          |          |          |   |   |      |          |  |  |  |  |     |          |          |  |  |  |      |          |          |          |  |  |     |          |          |          |          |  |     |          |          |          |          |          |      |          |          |          |          |          |      |          |          |          |          |          |      |          |          |          |          |          |     |          |          |          |          |          |      |          |          |          |          |          |      |          |          |          |          |          |      |          |          |          |          |          |  |   |   |   |   |    |      |          |  |  |  |  |      |          |          |  |  |  |      |          |          |          |  |  |     |          |          |          |          |  |      |          |          |          |          |          |      |          |          |          |          |          |      |          |          |          |          |          |  |    |    |  |  |  |      |          |          |  |  |  |
| 8 Co                                                                                                                           | 3.347551                                                                                                                                                                                                                                                                                                                                                                                                                                                                                                                                                                                                                                                                                                                                                                                                                                                                                                                                                                                                                                                                                                                                                                                                                                                                                                                                                                                                                                                                                                                                                                                                                                                                                                                                                                                                                                                                                                                                                                                                                                                                                                                                                                                                                                                                                                                            | 2.293408 | 0.000000 |          |          |   |   |      |          |  |  |  |  |     |          |          |  |  |  |      |          |          |          |  |  |     |          |          |          |          |  |     |          |          |          |          |          |      |          |          |          |          |          |      |          |          |          |          |          |      |          |          |          |          |          |     |          |          |          |          |          |      |          |          |          |          |          |      |          |          |          |          |          |      |          |          |          |          |          |  |   |   |   |   |    |      |          |  |  |  |  |      |          |          |  |  |  |      |          |          |          |  |  |     |          |          |          |          |  |      |          |          |          |          |          |      |          |          |          |          |          |      |          |          |          |          |          |  |    |    |  |  |  |      |          |          |  |  |  |
| 9 B                                                                                                                            | 3.465684                                                                                                                                                                                                                                                                                                                                                                                                                                                                                                                                                                                                                                                                                                                                                                                                                                                                                                                                                                                                                                                                                                                                                                                                                                                                                                                                                                                                                                                                                                                                                                                                                                                                                                                                                                                                                                                                                                                                                                                                                                                                                                                                                                                                                                                                                                                            | 2.013647 | 2.126393 | 0.000000 |          |   |   |      |          |  |  |  |  |     |          |          |  |  |  |      |          |          |          |  |  |     |          |          |          |          |  |     |          |          |          |          |          |      |          |          |          |          |          |      |          |          |          |          |          |      |          |          |          |          |          |     |          |          |          |          |          |      |          |          |          |          |          |      |          |          |          |          |          |      |          |          |          |          |          |  |   |   |   |   |    |      |          |  |  |  |  |      |          |          |  |  |  |      |          |          |          |  |  |     |          |          |          |          |  |      |          |          |          |          |          |      |          |          |          |          |          |      |          |          |          |          |          |  |    |    |  |  |  |      |          |          |  |  |  |
| 10 B                                                                                                                           | 2.834511                                                                                                                                                                                                                                                                                                                                                                                                                                                                                                                                                                                                                                                                                                                                                                                                                                                                                                                                                                                                                                                                                                                                                                                                                                                                                                                                                                                                                                                                                                                                                                                                                                                                                                                                                                                                                                                                                                                                                                                                                                                                                                                                                                                                                                                                                                                            | 3.149115 | 2.094730 | 1.710954 | 0.000000 |   |   |      |          |  |  |  |  |     |          |          |  |  |  |      |          |          |          |  |  |     |          |          |          |          |  |     |          |          |          |          |          |      |          |          |          |          |          |      |          |          |          |          |          |      |          |          |          |          |          |     |          |          |          |          |          |      |          |          |          |          |          |      |          |          |          |          |          |      |          |          |          |          |          |  |   |   |   |   |    |      |          |  |  |  |  |      |          |          |  |  |  |      |          |          |          |  |  |     |          |          |          |          |  |      |          |          |          |          |          |      |          |          |          |          |          |      |          |          |          |          |          |  |    |    |  |  |  |      |          |          |  |  |  |
| 11 B                                                                                                                           | 2.844764                                                                                                                                                                                                                                                                                                                                                                                                                                                                                                                                                                                                                                                                                                                                                                                                                                                                                                                                                                                                                                                                                                                                                                                                                                                                                                                                                                                                                                                                                                                                                                                                                                                                                                                                                                                                                                                                                                                                                                                                                                                                                                                                                                                                                                                                                                                            | 3.304102 | 3.453033 | 1.952219 | 1.786504 |   |   |      |          |  |  |  |  |     |          |          |  |  |  |      |          |          |          |  |  |     |          |          |          |          |  |     |          |          |          |          |          |      |          |          |          |          |          |      |          |          |          |          |          |      |          |          |          |          |          |     |          |          |          |          |          |      |          |          |          |          |          |      |          |          |          |          |          |      |          |          |          |          |          |  |   |   |   |   |    |      |          |  |  |  |  |      |          |          |  |  |  |      |          |          |          |  |  |     |          |          |          |          |  |      |          |          |          |          |          |      |          |          |          |          |          |      |          |          |          |          |          |  |    |    |  |  |  |      |          |          |  |  |  |
| 12 B                                                                                                                           | 1.757334                                                                                                                                                                                                                                                                                                                                                                                                                                                                                                                                                                                                                                                                                                                                                                                                                                                                                                                                                                                                                                                                                                                                                                                                                                                                                                                                                                                                                                                                                                                                                                                                                                                                                                                                                                                                                                                                                                                                                                                                                                                                                                                                                                                                                                                                                                                            | 2.072067 | 2.146742 | 2.911924 | 2.831002 |   |   |      |          |  |  |  |  |     |          |          |  |  |  |      |          |          |          |  |  |     |          |          |          |          |  |     |          |          |          |          |          |      |          |          |          |          |          |      |          |          |          |          |          |      |          |          |          |          |          |     |          |          |          |          |          |      |          |          |          |          |          |      |          |          |          |          |          |      |          |          |          |          |          |  |   |   |   |   |    |      |          |  |  |  |  |      |          |          |  |  |  |      |          |          |          |  |  |     |          |          |          |          |  |      |          |          |          |          |          |      |          |          |          |          |          |      |          |          |          |          |          |  |    |    |  |  |  |      |          |          |  |  |  |
|                                                                                                                                | 11                                                                                                                                                                                                                                                                                                                                                                                                                                                                                                                                                                                                                                                                                                                                                                                                                                                                                                                                                                                                                                                                                                                                                                                                                                                                                                                                                                                                                                                                                                                                                                                                                                                                                                                                                                                                                                                                                                                                                                                                                                                                                                                                                                                                                                                                                                                                  | 12       |          |          |          |   |   |      |          |  |  |  |  |     |          |          |  |  |  |      |          |          |          |  |  |     |          |          |          |          |  |     |          |          |          |          |          |      |          |          |          |          |          |      |          |          |          |          |          |      |          |          |          |          |          |     |          |          |          |          |          |      |          |          |          |          |          |      |          |          |          |          |          |      |          |          |          |          |          |  |   |   |   |   |    |      |          |  |  |  |  |      |          |          |  |  |  |      |          |          |          |  |  |     |          |          |          |          |  |      |          |          |          |          |          |      |          |          |          |          |          |      |          |          |          |          |          |  |    |    |  |  |  |      |          |          |  |  |  |
| 12 B                                                                                                                           | 3.375572                                                                                                                                                                                                                                                                                                                                                                                                                                                                                                                                                                                                                                                                                                                                                                                                                                                                                                                                                                                                                                                                                                                                                                                                                                                                                                                                                                                                                                                                                                                                                                                                                                                                                                                                                                                                                                                                                                                                                                                                                                                                                                                                                                                                                                                                                                                            | 0.000000 |          |          |          |   |   |      |          |  |  |  |  |     |          |          |  |  |  |      |          |          |          |  |  |     |          |          |          |          |  |     |          |          |          |          |          |      |          |          |          |          |          |      |          |          |          |          |          |      |          |          |          |          |          |     |          |          |          |          |          |      |          |          |          |          |          |      |          |          |          |          |          |      |          |          |          |          |          |  |   |   |   |   |    |      |          |  |  |  |  |      |          |          |  |  |  |      |          |          |          |  |  |     |          |          |          |          |  |      |          |          |          |          |          |      |          |          |          |          |          |      |          |          |          |          |          |  |    |    |  |  |  |      |          |          |  |  |  |
|  <p>4. -6608.2613520 +6.9 C<sub>1</sub></p> | <table border="1"> <thead> <tr> <th></th> <th>1</th> <th>2</th> <th>3</th> <th>4</th> <th>5</th> </tr> </thead> <tbody> <tr><td>1 B</td><td>0.000000</td><td></td><td></td><td></td><td></td></tr> <tr><td>2 B</td><td>3.821567</td><td>0.000000</td><td></td><td></td><td></td></tr> <tr><td>3 Se</td><td>2.021386</td><td>4.024614</td><td>0.000000</td><td></td><td></td></tr> <tr><td>4 B</td><td>1.878863</td><td>3.060432</td><td>2.076481</td><td>0.000000</td><td></td></tr> <tr><td>5 B</td><td>3.317685</td><td>1.882488</td><td>2.794754</td><td>1.928091</td><td>0.000000</td></tr> <tr><td>6 Se</td><td>3.897075</td><td>2.048197</td><td>3.210348</td><td>3.413122</td><td>2.039966</td></tr> <tr><td>7 Co</td><td>2.034280</td><td>3.332014</td><td>3.510115</td><td>3.228768</td><td>3.872895</td></tr> <tr><td>8 B</td><td>3.172297</td><td>1.866551</td><td>3.639547</td><td>3.409554</td><td>2.911547</td></tr> <tr><td>9 B</td><td>1.745127</td><td>2.943649</td><td>3.252159</td><td>1.800158</td><td>2.960289</td></tr> <tr><td>10 B</td><td>2.993522</td><td>1.749376</td><td>4.070059</td><td>2.899657</td><td>2.882596</td></tr> <tr><td>11 B</td><td>2.982900</td><td>1.766251</td><td>3.516474</td><td>1.777623</td><td>1.694626</td></tr> <tr><td>12 B</td><td>2.012112</td><td>3.236317</td><td>2.071627</td><td>2.858502</td><td>3.084050</td></tr> <tr> <th></th> <th>6</th> <th>7</th> <th>8</th> <th>9</th> <th>10</th> </tr> <tr><td>6 Se</td><td>0.000000</td><td></td><td></td><td></td><td></td></tr> <tr><td>7 Co</td><td>3.734451</td><td>0.000000</td><td></td><td></td><td></td></tr> <tr><td>8 B</td><td>2.069275</td><td>2.028284</td><td>0.000000</td><td></td><td></td></tr> <tr><td>9 B</td><td>3.935711</td><td>2.065373</td><td>2.894183</td><td>0.000000</td><td></td></tr> <tr><td>10 B</td><td>3.220812</td><td>2.054469</td><td>1.766868</td><td>1.766681</td><td>0.000000</td></tr> <tr><td>11 B</td><td>3.145949</td><td>3.234929</td><td>2.835500</td><td>1.772997</td><td>1.782612</td></tr> <tr><td>12 B</td><td>2.499087</td><td>1.989597</td><td>1.981291</td><td>2.912260</td><td>2.986884</td></tr> <tr> <th></th> <th>11</th> <th>12</th> <th colspan="3"></th> </tr> <tr><td>12 B</td><td>3.410172</td><td>0.000000</td><td colspan="3"></td></tr> </tbody> </table> |          | 1        | 2        | 3        | 4 | 5 | 1 B  | 0.000000 |  |  |  |  | 2 B | 3.821567 | 0.000000 |  |  |  | 3 Se | 2.021386 | 4.024614 | 0.000000 |  |  | 4 B | 1.878863 | 3.060432 | 2.076481 | 0.000000 |  | 5 B | 3.317685 | 1.882488 | 2.794754 | 1.928091 | 0.000000 | 6 Se | 3.897075 | 2.048197 | 3.210348 | 3.413122 | 2.039966 | 7 Co | 2.034280 | 3.332014 | 3.510115 | 3.228768 | 3.872895 | 8 B  | 3.172297 | 1.866551 | 3.639547 | 3.409554 | 2.911547 | 9 B | 1.745127 | 2.943649 | 3.252159 | 1.800158 | 2.960289 | 10 B | 2.993522 | 1.749376 | 4.070059 | 2.899657 | 2.882596 | 11 B | 2.982900 | 1.766251 | 3.516474 | 1.777623 | 1.694626 | 12 B | 2.012112 | 3.236317 | 2.071627 | 2.858502 | 3.084050 |  | 6 | 7 | 8 | 9 | 10 | 6 Se | 0.000000 |  |  |  |  | 7 Co | 3.734451 | 0.000000 |  |  |  | 8 B  | 2.069275 | 2.028284 | 0.000000 |  |  | 9 B | 3.935711 | 2.065373 | 2.894183 | 0.000000 |  | 10 B | 3.220812 | 2.054469 | 1.766868 | 1.766681 | 0.000000 | 11 B | 3.145949 | 3.234929 | 2.835500 | 1.772997 | 1.782612 | 12 B | 2.499087 | 1.989597 | 1.981291 | 2.912260 | 2.986884 |  | 11 | 12 |  |  |  | 12 B | 3.410172 | 0.000000 |  |  |  |
|                                                                                                                                | 1                                                                                                                                                                                                                                                                                                                                                                                                                                                                                                                                                                                                                                                                                                                                                                                                                                                                                                                                                                                                                                                                                                                                                                                                                                                                                                                                                                                                                                                                                                                                                                                                                                                                                                                                                                                                                                                                                                                                                                                                                                                                                                                                                                                                                                                                                                                                   | 2        | 3        | 4        | 5        |   |   |      |          |  |  |  |  |     |          |          |  |  |  |      |          |          |          |  |  |     |          |          |          |          |  |     |          |          |          |          |          |      |          |          |          |          |          |      |          |          |          |          |          |      |          |          |          |          |          |     |          |          |          |          |          |      |          |          |          |          |          |      |          |          |          |          |          |      |          |          |          |          |          |  |   |   |   |   |    |      |          |  |  |  |  |      |          |          |  |  |  |      |          |          |          |  |  |     |          |          |          |          |  |      |          |          |          |          |          |      |          |          |          |          |          |      |          |          |          |          |          |  |    |    |  |  |  |      |          |          |  |  |  |
| 1 B                                                                                                                            | 0.000000                                                                                                                                                                                                                                                                                                                                                                                                                                                                                                                                                                                                                                                                                                                                                                                                                                                                                                                                                                                                                                                                                                                                                                                                                                                                                                                                                                                                                                                                                                                                                                                                                                                                                                                                                                                                                                                                                                                                                                                                                                                                                                                                                                                                                                                                                                                            |          |          |          |          |   |   |      |          |  |  |  |  |     |          |          |  |  |  |      |          |          |          |  |  |     |          |          |          |          |  |     |          |          |          |          |          |      |          |          |          |          |          |      |          |          |          |          |          |      |          |          |          |          |          |     |          |          |          |          |          |      |          |          |          |          |          |      |          |          |          |          |          |      |          |          |          |          |          |  |   |   |   |   |    |      |          |  |  |  |  |      |          |          |  |  |  |      |          |          |          |  |  |     |          |          |          |          |  |      |          |          |          |          |          |      |          |          |          |          |          |      |          |          |          |          |          |  |    |    |  |  |  |      |          |          |  |  |  |
| 2 B                                                                                                                            | 3.821567                                                                                                                                                                                                                                                                                                                                                                                                                                                                                                                                                                                                                                                                                                                                                                                                                                                                                                                                                                                                                                                                                                                                                                                                                                                                                                                                                                                                                                                                                                                                                                                                                                                                                                                                                                                                                                                                                                                                                                                                                                                                                                                                                                                                                                                                                                                            | 0.000000 |          |          |          |   |   |      |          |  |  |  |  |     |          |          |  |  |  |      |          |          |          |  |  |     |          |          |          |          |  |     |          |          |          |          |          |      |          |          |          |          |          |      |          |          |          |          |          |      |          |          |          |          |          |     |          |          |          |          |          |      |          |          |          |          |          |      |          |          |          |          |          |      |          |          |          |          |          |  |   |   |   |   |    |      |          |  |  |  |  |      |          |          |  |  |  |      |          |          |          |  |  |     |          |          |          |          |  |      |          |          |          |          |          |      |          |          |          |          |          |      |          |          |          |          |          |  |    |    |  |  |  |      |          |          |  |  |  |
| 3 Se                                                                                                                           | 2.021386                                                                                                                                                                                                                                                                                                                                                                                                                                                                                                                                                                                                                                                                                                                                                                                                                                                                                                                                                                                                                                                                                                                                                                                                                                                                                                                                                                                                                                                                                                                                                                                                                                                                                                                                                                                                                                                                                                                                                                                                                                                                                                                                                                                                                                                                                                                            | 4.024614 | 0.000000 |          |          |   |   |      |          |  |  |  |  |     |          |          |  |  |  |      |          |          |          |  |  |     |          |          |          |          |  |     |          |          |          |          |          |      |          |          |          |          |          |      |          |          |          |          |          |      |          |          |          |          |          |     |          |          |          |          |          |      |          |          |          |          |          |      |          |          |          |          |          |      |          |          |          |          |          |  |   |   |   |   |    |      |          |  |  |  |  |      |          |          |  |  |  |      |          |          |          |  |  |     |          |          |          |          |  |      |          |          |          |          |          |      |          |          |          |          |          |      |          |          |          |          |          |  |    |    |  |  |  |      |          |          |  |  |  |
| 4 B                                                                                                                            | 1.878863                                                                                                                                                                                                                                                                                                                                                                                                                                                                                                                                                                                                                                                                                                                                                                                                                                                                                                                                                                                                                                                                                                                                                                                                                                                                                                                                                                                                                                                                                                                                                                                                                                                                                                                                                                                                                                                                                                                                                                                                                                                                                                                                                                                                                                                                                                                            | 3.060432 | 2.076481 | 0.000000 |          |   |   |      |          |  |  |  |  |     |          |          |  |  |  |      |          |          |          |  |  |     |          |          |          |          |  |     |          |          |          |          |          |      |          |          |          |          |          |      |          |          |          |          |          |      |          |          |          |          |          |     |          |          |          |          |          |      |          |          |          |          |          |      |          |          |          |          |          |      |          |          |          |          |          |  |   |   |   |   |    |      |          |  |  |  |  |      |          |          |  |  |  |      |          |          |          |  |  |     |          |          |          |          |  |      |          |          |          |          |          |      |          |          |          |          |          |      |          |          |          |          |          |  |    |    |  |  |  |      |          |          |  |  |  |
| 5 B                                                                                                                            | 3.317685                                                                                                                                                                                                                                                                                                                                                                                                                                                                                                                                                                                                                                                                                                                                                                                                                                                                                                                                                                                                                                                                                                                                                                                                                                                                                                                                                                                                                                                                                                                                                                                                                                                                                                                                                                                                                                                                                                                                                                                                                                                                                                                                                                                                                                                                                                                            | 1.882488 | 2.794754 | 1.928091 | 0.000000 |   |   |      |          |  |  |  |  |     |          |          |  |  |  |      |          |          |          |  |  |     |          |          |          |          |  |     |          |          |          |          |          |      |          |          |          |          |          |      |          |          |          |          |          |      |          |          |          |          |          |     |          |          |          |          |          |      |          |          |          |          |          |      |          |          |          |          |          |      |          |          |          |          |          |  |   |   |   |   |    |      |          |  |  |  |  |      |          |          |  |  |  |      |          |          |          |  |  |     |          |          |          |          |  |      |          |          |          |          |          |      |          |          |          |          |          |      |          |          |          |          |          |  |    |    |  |  |  |      |          |          |  |  |  |
| 6 Se                                                                                                                           | 3.897075                                                                                                                                                                                                                                                                                                                                                                                                                                                                                                                                                                                                                                                                                                                                                                                                                                                                                                                                                                                                                                                                                                                                                                                                                                                                                                                                                                                                                                                                                                                                                                                                                                                                                                                                                                                                                                                                                                                                                                                                                                                                                                                                                                                                                                                                                                                            | 2.048197 | 3.210348 | 3.413122 | 2.039966 |   |   |      |          |  |  |  |  |     |          |          |  |  |  |      |          |          |          |  |  |     |          |          |          |          |  |     |          |          |          |          |          |      |          |          |          |          |          |      |          |          |          |          |          |      |          |          |          |          |          |     |          |          |          |          |          |      |          |          |          |          |          |      |          |          |          |          |          |      |          |          |          |          |          |  |   |   |   |   |    |      |          |  |  |  |  |      |          |          |  |  |  |      |          |          |          |  |  |     |          |          |          |          |  |      |          |          |          |          |          |      |          |          |          |          |          |      |          |          |          |          |          |  |    |    |  |  |  |      |          |          |  |  |  |
| 7 Co                                                                                                                           | 2.034280                                                                                                                                                                                                                                                                                                                                                                                                                                                                                                                                                                                                                                                                                                                                                                                                                                                                                                                                                                                                                                                                                                                                                                                                                                                                                                                                                                                                                                                                                                                                                                                                                                                                                                                                                                                                                                                                                                                                                                                                                                                                                                                                                                                                                                                                                                                            | 3.332014 | 3.510115 | 3.228768 | 3.872895 |   |   |      |          |  |  |  |  |     |          |          |  |  |  |      |          |          |          |  |  |     |          |          |          |          |  |     |          |          |          |          |          |      |          |          |          |          |          |      |          |          |          |          |          |      |          |          |          |          |          |     |          |          |          |          |          |      |          |          |          |          |          |      |          |          |          |          |          |      |          |          |          |          |          |  |   |   |   |   |    |      |          |  |  |  |  |      |          |          |  |  |  |      |          |          |          |  |  |     |          |          |          |          |  |      |          |          |          |          |          |      |          |          |          |          |          |      |          |          |          |          |          |  |    |    |  |  |  |      |          |          |  |  |  |
| 8 B                                                                                                                            | 3.172297                                                                                                                                                                                                                                                                                                                                                                                                                                                                                                                                                                                                                                                                                                                                                                                                                                                                                                                                                                                                                                                                                                                                                                                                                                                                                                                                                                                                                                                                                                                                                                                                                                                                                                                                                                                                                                                                                                                                                                                                                                                                                                                                                                                                                                                                                                                            | 1.866551 | 3.639547 | 3.409554 | 2.911547 |   |   |      |          |  |  |  |  |     |          |          |  |  |  |      |          |          |          |  |  |     |          |          |          |          |  |     |          |          |          |          |          |      |          |          |          |          |          |      |          |          |          |          |          |      |          |          |          |          |          |     |          |          |          |          |          |      |          |          |          |          |          |      |          |          |          |          |          |      |          |          |          |          |          |  |   |   |   |   |    |      |          |  |  |  |  |      |          |          |  |  |  |      |          |          |          |  |  |     |          |          |          |          |  |      |          |          |          |          |          |      |          |          |          |          |          |      |          |          |          |          |          |  |    |    |  |  |  |      |          |          |  |  |  |
| 9 B                                                                                                                            | 1.745127                                                                                                                                                                                                                                                                                                                                                                                                                                                                                                                                                                                                                                                                                                                                                                                                                                                                                                                                                                                                                                                                                                                                                                                                                                                                                                                                                                                                                                                                                                                                                                                                                                                                                                                                                                                                                                                                                                                                                                                                                                                                                                                                                                                                                                                                                                                            | 2.943649 | 3.252159 | 1.800158 | 2.960289 |   |   |      |          |  |  |  |  |     |          |          |  |  |  |      |          |          |          |  |  |     |          |          |          |          |  |     |          |          |          |          |          |      |          |          |          |          |          |      |          |          |          |          |          |      |          |          |          |          |          |     |          |          |          |          |          |      |          |          |          |          |          |      |          |          |          |          |          |      |          |          |          |          |          |  |   |   |   |   |    |      |          |  |  |  |  |      |          |          |  |  |  |      |          |          |          |  |  |     |          |          |          |          |  |      |          |          |          |          |          |      |          |          |          |          |          |      |          |          |          |          |          |  |    |    |  |  |  |      |          |          |  |  |  |
| 10 B                                                                                                                           | 2.993522                                                                                                                                                                                                                                                                                                                                                                                                                                                                                                                                                                                                                                                                                                                                                                                                                                                                                                                                                                                                                                                                                                                                                                                                                                                                                                                                                                                                                                                                                                                                                                                                                                                                                                                                                                                                                                                                                                                                                                                                                                                                                                                                                                                                                                                                                                                            | 1.749376 | 4.070059 | 2.899657 | 2.882596 |   |   |      |          |  |  |  |  |     |          |          |  |  |  |      |          |          |          |  |  |     |          |          |          |          |  |     |          |          |          |          |          |      |          |          |          |          |          |      |          |          |          |          |          |      |          |          |          |          |          |     |          |          |          |          |          |      |          |          |          |          |          |      |          |          |          |          |          |      |          |          |          |          |          |  |   |   |   |   |    |      |          |  |  |  |  |      |          |          |  |  |  |      |          |          |          |  |  |     |          |          |          |          |  |      |          |          |          |          |          |      |          |          |          |          |          |      |          |          |          |          |          |  |    |    |  |  |  |      |          |          |  |  |  |
| 11 B                                                                                                                           | 2.982900                                                                                                                                                                                                                                                                                                                                                                                                                                                                                                                                                                                                                                                                                                                                                                                                                                                                                                                                                                                                                                                                                                                                                                                                                                                                                                                                                                                                                                                                                                                                                                                                                                                                                                                                                                                                                                                                                                                                                                                                                                                                                                                                                                                                                                                                                                                            | 1.766251 | 3.516474 | 1.777623 | 1.694626 |   |   |      |          |  |  |  |  |     |          |          |  |  |  |      |          |          |          |  |  |     |          |          |          |          |  |     |          |          |          |          |          |      |          |          |          |          |          |      |          |          |          |          |          |      |          |          |          |          |          |     |          |          |          |          |          |      |          |          |          |          |          |      |          |          |          |          |          |      |          |          |          |          |          |  |   |   |   |   |    |      |          |  |  |  |  |      |          |          |  |  |  |      |          |          |          |  |  |     |          |          |          |          |  |      |          |          |          |          |          |      |          |          |          |          |          |      |          |          |          |          |          |  |    |    |  |  |  |      |          |          |  |  |  |
| 12 B                                                                                                                           | 2.012112                                                                                                                                                                                                                                                                                                                                                                                                                                                                                                                                                                                                                                                                                                                                                                                                                                                                                                                                                                                                                                                                                                                                                                                                                                                                                                                                                                                                                                                                                                                                                                                                                                                                                                                                                                                                                                                                                                                                                                                                                                                                                                                                                                                                                                                                                                                            | 3.236317 | 2.071627 | 2.858502 | 3.084050 |   |   |      |          |  |  |  |  |     |          |          |  |  |  |      |          |          |          |  |  |     |          |          |          |          |  |     |          |          |          |          |          |      |          |          |          |          |          |      |          |          |          |          |          |      |          |          |          |          |          |     |          |          |          |          |          |      |          |          |          |          |          |      |          |          |          |          |          |      |          |          |          |          |          |  |   |   |   |   |    |      |          |  |  |  |  |      |          |          |  |  |  |      |          |          |          |  |  |     |          |          |          |          |  |      |          |          |          |          |          |      |          |          |          |          |          |      |          |          |          |          |          |  |    |    |  |  |  |      |          |          |  |  |  |
|                                                                                                                                | 6                                                                                                                                                                                                                                                                                                                                                                                                                                                                                                                                                                                                                                                                                                                                                                                                                                                                                                                                                                                                                                                                                                                                                                                                                                                                                                                                                                                                                                                                                                                                                                                                                                                                                                                                                                                                                                                                                                                                                                                                                                                                                                                                                                                                                                                                                                                                   | 7        | 8        | 9        | 10       |   |   |      |          |  |  |  |  |     |          |          |  |  |  |      |          |          |          |  |  |     |          |          |          |          |  |     |          |          |          |          |          |      |          |          |          |          |          |      |          |          |          |          |          |      |          |          |          |          |          |     |          |          |          |          |          |      |          |          |          |          |          |      |          |          |          |          |          |      |          |          |          |          |          |  |   |   |   |   |    |      |          |  |  |  |  |      |          |          |  |  |  |      |          |          |          |  |  |     |          |          |          |          |  |      |          |          |          |          |          |      |          |          |          |          |          |      |          |          |          |          |          |  |    |    |  |  |  |      |          |          |  |  |  |
| 6 Se                                                                                                                           | 0.000000                                                                                                                                                                                                                                                                                                                                                                                                                                                                                                                                                                                                                                                                                                                                                                                                                                                                                                                                                                                                                                                                                                                                                                                                                                                                                                                                                                                                                                                                                                                                                                                                                                                                                                                                                                                                                                                                                                                                                                                                                                                                                                                                                                                                                                                                                                                            |          |          |          |          |   |   |      |          |  |  |  |  |     |          |          |  |  |  |      |          |          |          |  |  |     |          |          |          |          |  |     |          |          |          |          |          |      |          |          |          |          |          |      |          |          |          |          |          |      |          |          |          |          |          |     |          |          |          |          |          |      |          |          |          |          |          |      |          |          |          |          |          |      |          |          |          |          |          |  |   |   |   |   |    |      |          |  |  |  |  |      |          |          |  |  |  |      |          |          |          |  |  |     |          |          |          |          |  |      |          |          |          |          |          |      |          |          |          |          |          |      |          |          |          |          |          |  |    |    |  |  |  |      |          |          |  |  |  |
| 7 Co                                                                                                                           | 3.734451                                                                                                                                                                                                                                                                                                                                                                                                                                                                                                                                                                                                                                                                                                                                                                                                                                                                                                                                                                                                                                                                                                                                                                                                                                                                                                                                                                                                                                                                                                                                                                                                                                                                                                                                                                                                                                                                                                                                                                                                                                                                                                                                                                                                                                                                                                                            | 0.000000 |          |          |          |   |   |      |          |  |  |  |  |     |          |          |  |  |  |      |          |          |          |  |  |     |          |          |          |          |  |     |          |          |          |          |          |      |          |          |          |          |          |      |          |          |          |          |          |      |          |          |          |          |          |     |          |          |          |          |          |      |          |          |          |          |          |      |          |          |          |          |          |      |          |          |          |          |          |  |   |   |   |   |    |      |          |  |  |  |  |      |          |          |  |  |  |      |          |          |          |  |  |     |          |          |          |          |  |      |          |          |          |          |          |      |          |          |          |          |          |      |          |          |          |          |          |  |    |    |  |  |  |      |          |          |  |  |  |
| 8 B                                                                                                                            | 2.069275                                                                                                                                                                                                                                                                                                                                                                                                                                                                                                                                                                                                                                                                                                                                                                                                                                                                                                                                                                                                                                                                                                                                                                                                                                                                                                                                                                                                                                                                                                                                                                                                                                                                                                                                                                                                                                                                                                                                                                                                                                                                                                                                                                                                                                                                                                                            | 2.028284 | 0.000000 |          |          |   |   |      |          |  |  |  |  |     |          |          |  |  |  |      |          |          |          |  |  |     |          |          |          |          |  |     |          |          |          |          |          |      |          |          |          |          |          |      |          |          |          |          |          |      |          |          |          |          |          |     |          |          |          |          |          |      |          |          |          |          |          |      |          |          |          |          |          |      |          |          |          |          |          |  |   |   |   |   |    |      |          |  |  |  |  |      |          |          |  |  |  |      |          |          |          |  |  |     |          |          |          |          |  |      |          |          |          |          |          |      |          |          |          |          |          |      |          |          |          |          |          |  |    |    |  |  |  |      |          |          |  |  |  |
| 9 B                                                                                                                            | 3.935711                                                                                                                                                                                                                                                                                                                                                                                                                                                                                                                                                                                                                                                                                                                                                                                                                                                                                                                                                                                                                                                                                                                                                                                                                                                                                                                                                                                                                                                                                                                                                                                                                                                                                                                                                                                                                                                                                                                                                                                                                                                                                                                                                                                                                                                                                                                            | 2.065373 | 2.894183 | 0.000000 |          |   |   |      |          |  |  |  |  |     |          |          |  |  |  |      |          |          |          |  |  |     |          |          |          |          |  |     |          |          |          |          |          |      |          |          |          |          |          |      |          |          |          |          |          |      |          |          |          |          |          |     |          |          |          |          |          |      |          |          |          |          |          |      |          |          |          |          |          |      |          |          |          |          |          |  |   |   |   |   |    |      |          |  |  |  |  |      |          |          |  |  |  |      |          |          |          |  |  |     |          |          |          |          |  |      |          |          |          |          |          |      |          |          |          |          |          |      |          |          |          |          |          |  |    |    |  |  |  |      |          |          |  |  |  |
| 10 B                                                                                                                           | 3.220812                                                                                                                                                                                                                                                                                                                                                                                                                                                                                                                                                                                                                                                                                                                                                                                                                                                                                                                                                                                                                                                                                                                                                                                                                                                                                                                                                                                                                                                                                                                                                                                                                                                                                                                                                                                                                                                                                                                                                                                                                                                                                                                                                                                                                                                                                                                            | 2.054469 | 1.766868 | 1.766681 | 0.000000 |   |   |      |          |  |  |  |  |     |          |          |  |  |  |      |          |          |          |  |  |     |          |          |          |          |  |     |          |          |          |          |          |      |          |          |          |          |          |      |          |          |          |          |          |      |          |          |          |          |          |     |          |          |          |          |          |      |          |          |          |          |          |      |          |          |          |          |          |      |          |          |          |          |          |  |   |   |   |   |    |      |          |  |  |  |  |      |          |          |  |  |  |      |          |          |          |  |  |     |          |          |          |          |  |      |          |          |          |          |          |      |          |          |          |          |          |      |          |          |          |          |          |  |    |    |  |  |  |      |          |          |  |  |  |
| 11 B                                                                                                                           | 3.145949                                                                                                                                                                                                                                                                                                                                                                                                                                                                                                                                                                                                                                                                                                                                                                                                                                                                                                                                                                                                                                                                                                                                                                                                                                                                                                                                                                                                                                                                                                                                                                                                                                                                                                                                                                                                                                                                                                                                                                                                                                                                                                                                                                                                                                                                                                                            | 3.234929 | 2.835500 | 1.772997 | 1.782612 |   |   |      |          |  |  |  |  |     |          |          |  |  |  |      |          |          |          |  |  |     |          |          |          |          |  |     |          |          |          |          |          |      |          |          |          |          |          |      |          |          |          |          |          |      |          |          |          |          |          |     |          |          |          |          |          |      |          |          |          |          |          |      |          |          |          |          |          |      |          |          |          |          |          |  |   |   |   |   |    |      |          |  |  |  |  |      |          |          |  |  |  |      |          |          |          |  |  |     |          |          |          |          |  |      |          |          |          |          |          |      |          |          |          |          |          |      |          |          |          |          |          |  |    |    |  |  |  |      |          |          |  |  |  |
| 12 B                                                                                                                           | 2.499087                                                                                                                                                                                                                                                                                                                                                                                                                                                                                                                                                                                                                                                                                                                                                                                                                                                                                                                                                                                                                                                                                                                                                                                                                                                                                                                                                                                                                                                                                                                                                                                                                                                                                                                                                                                                                                                                                                                                                                                                                                                                                                                                                                                                                                                                                                                            | 1.989597 | 1.981291 | 2.912260 | 2.986884 |   |   |      |          |  |  |  |  |     |          |          |  |  |  |      |          |          |          |  |  |     |          |          |          |          |  |     |          |          |          |          |          |      |          |          |          |          |          |      |          |          |          |          |          |      |          |          |          |          |          |     |          |          |          |          |          |      |          |          |          |          |          |      |          |          |          |          |          |      |          |          |          |          |          |  |   |   |   |   |    |      |          |  |  |  |  |      |          |          |  |  |  |      |          |          |          |  |  |     |          |          |          |          |  |      |          |          |          |          |          |      |          |          |          |          |          |      |          |          |          |          |          |  |    |    |  |  |  |      |          |          |  |  |  |
|                                                                                                                                | 11                                                                                                                                                                                                                                                                                                                                                                                                                                                                                                                                                                                                                                                                                                                                                                                                                                                                                                                                                                                                                                                                                                                                                                                                                                                                                                                                                                                                                                                                                                                                                                                                                                                                                                                                                                                                                                                                                                                                                                                                                                                                                                                                                                                                                                                                                                                                  | 12       |          |          |          |   |   |      |          |  |  |  |  |     |          |          |  |  |  |      |          |          |          |  |  |     |          |          |          |          |  |     |          |          |          |          |          |      |          |          |          |          |          |      |          |          |          |          |          |      |          |          |          |          |          |     |          |          |          |          |          |      |          |          |          |          |          |      |          |          |          |          |          |      |          |          |          |          |          |  |   |   |   |   |    |      |          |  |  |  |  |      |          |          |  |  |  |      |          |          |          |  |  |     |          |          |          |          |  |      |          |          |          |          |          |      |          |          |          |          |          |      |          |          |          |          |          |  |    |    |  |  |  |      |          |          |  |  |  |
| 12 B                                                                                                                           | 3.410172                                                                                                                                                                                                                                                                                                                                                                                                                                                                                                                                                                                                                                                                                                                                                                                                                                                                                                                                                                                                                                                                                                                                                                                                                                                                                                                                                                                                                                                                                                                                                                                                                                                                                                                                                                                                                                                                                                                                                                                                                                                                                                                                                                                                                                                                                                                            | 0.000000 |          |          |          |   |   |      |          |  |  |  |  |     |          |          |  |  |  |      |          |          |          |  |  |     |          |          |          |          |  |     |          |          |          |          |          |      |          |          |          |          |          |      |          |          |          |          |          |      |          |          |          |          |          |     |          |          |          |          |          |      |          |          |          |          |          |      |          |          |          |          |          |      |          |          |          |          |          |  |   |   |   |   |    |      |          |  |  |  |  |      |          |          |  |  |  |      |          |          |          |  |  |     |          |          |          |          |  |      |          |          |          |          |          |      |          |          |          |          |          |      |          |          |          |          |          |  |    |    |  |  |  |      |          |          |  |  |  |

| 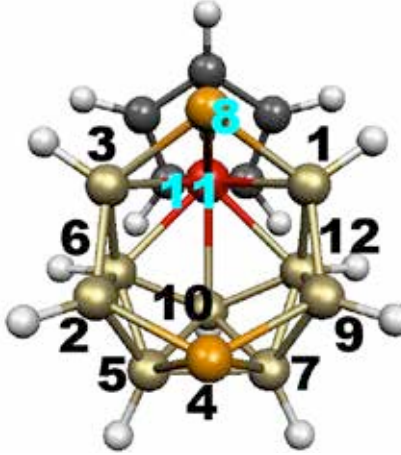 <p>5. -6608.2599010 +7.8 C<sub>s</sub></p>    | <table border="1"> <thead> <tr> <th></th> <th>1</th> <th>2</th> <th>3</th> <th>4</th> <th>5</th> </tr> </thead> <tbody> <tr><td>1 B</td><td>0.000000</td><td></td><td></td><td></td><td></td></tr> <tr><td>2 B</td><td>3.650741</td><td>0.000000</td><td></td><td></td><td></td></tr> <tr><td>3 B</td><td>3.063591</td><td>1.760416</td><td>0.000000</td><td></td><td></td></tr> <tr><td>4 Se</td><td>3.216003</td><td>2.031168</td><td>3.216126</td><td>0.000000</td><td></td></tr> <tr><td>5 B</td><td>3.843840</td><td>1.779863</td><td>3.000644</td><td>2.163519</td><td>0.000000</td></tr> <tr><td>6 B</td><td>3.520023</td><td>1.710731</td><td>1.795116</td><td>3.118689</td><td>1.718009</td></tr> <tr><td>7 B</td><td>3.000612</td><td>3.075424</td><td>3.843887</td><td>2.163506</td><td>1.883906</td></tr> <tr><td>8 Se</td><td>1.963790</td><td>3.236697</td><td>1.963781</td><td>3.670324</td><td>4.243794</td></tr> <tr><td>9 B</td><td>1.760346</td><td>3.339037</td><td>3.650872</td><td>2.031196</td><td>3.075464</td></tr> <tr><td>10 B</td><td>3.110961</td><td>2.859719</td><td>3.110952</td><td>3.147294</td><td>1.748806</td></tr> <tr><td>11 Co</td><td>2.243220</td><td>3.269428</td><td>2.243211</td><td>3.965317</td><td>3.338704</td></tr> <tr><td>12 B</td><td>1.795187</td><td>3.594298</td><td>3.520062</td><td>3.118700</td><td>2.930763</td></tr> <tr> <th></th> <th>6</th> <th>7</th> <th>8</th> <th>9</th> <th>10</th> </tr> <tr><td>6 B</td><td>0.000000</td><td></td><td></td><td></td><td></td></tr> <tr><td>7 B</td><td>2.930757</td><td>0.000000</td><td></td><td></td><td></td></tr> <tr><td>8 Se</td><td>3.356231</td><td>4.243808</td><td>0.000000</td><td></td><td></td></tr> <tr><td>9 B</td><td>3.594322</td><td>1.779869</td><td>3.236769</td><td>0.000000</td><td></td></tr> <tr><td>10 B</td><td>1.753100</td><td>1.748800</td><td>3.911207</td><td>2.859730</td><td>0.000000</td></tr> <tr><td>11 Co</td><td>2.175125</td><td>3.338683</td><td>2.392033</td><td>3.269412</td><td>2.182257</td></tr> <tr><td>12 B</td><td>2.992609</td><td>1.718011</td><td>3.356289</td><td>1.710750</td><td>1.753078</td></tr> <tr> <th></th> <th>11</th> <th>12</th> <th colspan="3"></th> </tr> <tr><td>12 B</td><td>2.175079</td><td>0.000000</td><td colspan="3"></td></tr> </tbody> </table> |          | 1        | 2        | 3        | 4 | 5 | 1 B  | 0.000000 |  |  |  |  | 2 B | 3.650741 | 0.000000 |  |  |  | 3 B | 3.063591 | 1.760416 | 0.000000 |  |  | 4 Se | 3.216003 | 2.031168 | 3.216126 | 0.000000 |  | 5 B | 3.843840 | 1.779863 | 3.000644 | 2.163519 | 0.000000 | 6 B | 3.520023 | 1.710731 | 1.795116 | 3.118689 | 1.718009 | 7 B | 3.000612 | 3.075424 | 3.843887 | 2.163506 | 1.883906 | 8 Se | 1.963790 | 3.236697 | 1.963781 | 3.670324 | 4.243794 | 9 B | 1.760346 | 3.339037 | 3.650872 | 2.031196 | 3.075464 | 10 B | 3.110961 | 2.859719 | 3.110952 | 3.147294 | 1.748806 | 11 Co | 2.243220 | 3.269428 | 2.243211 | 3.965317 | 3.338704 | 12 B | 1.795187 | 3.594298 | 3.520062 | 3.118700 | 2.930763 |  | 6 | 7 | 8 | 9 | 10 | 6 B | 0.000000 |  |  |  |  | 7 B | 2.930757 | 0.000000 |  |  |  | 8 Se | 3.356231 | 4.243808 | 0.000000 |  |  | 9 B | 3.594322 | 1.779869 | 3.236769 | 0.000000 |  | 10 B | 1.753100 | 1.748800 | 3.911207 | 2.859730 | 0.000000 | 11 Co | 2.175125 | 3.338683 | 2.392033 | 3.269412 | 2.182257 | 12 B | 2.992609 | 1.718011 | 3.356289 | 1.710750 | 1.753078 |  | 11 | 12 |  |  |  | 12 B | 2.175079 | 0.000000 |  |  |  |
|---------------------------------------------------------------------------------------------------------------------------------|-------------------------------------------------------------------------------------------------------------------------------------------------------------------------------------------------------------------------------------------------------------------------------------------------------------------------------------------------------------------------------------------------------------------------------------------------------------------------------------------------------------------------------------------------------------------------------------------------------------------------------------------------------------------------------------------------------------------------------------------------------------------------------------------------------------------------------------------------------------------------------------------------------------------------------------------------------------------------------------------------------------------------------------------------------------------------------------------------------------------------------------------------------------------------------------------------------------------------------------------------------------------------------------------------------------------------------------------------------------------------------------------------------------------------------------------------------------------------------------------------------------------------------------------------------------------------------------------------------------------------------------------------------------------------------------------------------------------------------------------------------------------------------------------------------------------------------------------------------------------------------------------------------------------------------------------------------------------------------------------------------------------------------------------------------------------------------------------------------------------------------------------------------------------------------------------------------------------------------------------------------------------------------------------------------------------------------------|----------|----------|----------|----------|---|---|------|----------|--|--|--|--|-----|----------|----------|--|--|--|-----|----------|----------|----------|--|--|------|----------|----------|----------|----------|--|-----|----------|----------|----------|----------|----------|-----|----------|----------|----------|----------|----------|-----|----------|----------|----------|----------|----------|------|----------|----------|----------|----------|----------|-----|----------|----------|----------|----------|----------|------|----------|----------|----------|----------|----------|-------|----------|----------|----------|----------|----------|------|----------|----------|----------|----------|----------|--|---|---|---|---|----|-----|----------|--|--|--|--|-----|----------|----------|--|--|--|------|----------|----------|----------|--|--|-----|----------|----------|----------|----------|--|------|----------|----------|----------|----------|----------|-------|----------|----------|----------|----------|----------|------|----------|----------|----------|----------|----------|--|----|----|--|--|--|------|----------|----------|--|--|--|
|                                                                                                                                 | 1                                                                                                                                                                                                                                                                                                                                                                                                                                                                                                                                                                                                                                                                                                                                                                                                                                                                                                                                                                                                                                                                                                                                                                                                                                                                                                                                                                                                                                                                                                                                                                                                                                                                                                                                                                                                                                                                                                                                                                                                                                                                                                                                                                                                                                                                                                                                   | 2        | 3        | 4        | 5        |   |   |      |          |  |  |  |  |     |          |          |  |  |  |     |          |          |          |  |  |      |          |          |          |          |  |     |          |          |          |          |          |     |          |          |          |          |          |     |          |          |          |          |          |      |          |          |          |          |          |     |          |          |          |          |          |      |          |          |          |          |          |       |          |          |          |          |          |      |          |          |          |          |          |  |   |   |   |   |    |     |          |  |  |  |  |     |          |          |  |  |  |      |          |          |          |  |  |     |          |          |          |          |  |      |          |          |          |          |          |       |          |          |          |          |          |      |          |          |          |          |          |  |    |    |  |  |  |      |          |          |  |  |  |
| 1 B                                                                                                                             | 0.000000                                                                                                                                                                                                                                                                                                                                                                                                                                                                                                                                                                                                                                                                                                                                                                                                                                                                                                                                                                                                                                                                                                                                                                                                                                                                                                                                                                                                                                                                                                                                                                                                                                                                                                                                                                                                                                                                                                                                                                                                                                                                                                                                                                                                                                                                                                                            |          |          |          |          |   |   |      |          |  |  |  |  |     |          |          |  |  |  |     |          |          |          |  |  |      |          |          |          |          |  |     |          |          |          |          |          |     |          |          |          |          |          |     |          |          |          |          |          |      |          |          |          |          |          |     |          |          |          |          |          |      |          |          |          |          |          |       |          |          |          |          |          |      |          |          |          |          |          |  |   |   |   |   |    |     |          |  |  |  |  |     |          |          |  |  |  |      |          |          |          |  |  |     |          |          |          |          |  |      |          |          |          |          |          |       |          |          |          |          |          |      |          |          |          |          |          |  |    |    |  |  |  |      |          |          |  |  |  |
| 2 B                                                                                                                             | 3.650741                                                                                                                                                                                                                                                                                                                                                                                                                                                                                                                                                                                                                                                                                                                                                                                                                                                                                                                                                                                                                                                                                                                                                                                                                                                                                                                                                                                                                                                                                                                                                                                                                                                                                                                                                                                                                                                                                                                                                                                                                                                                                                                                                                                                                                                                                                                            | 0.000000 |          |          |          |   |   |      |          |  |  |  |  |     |          |          |  |  |  |     |          |          |          |  |  |      |          |          |          |          |  |     |          |          |          |          |          |     |          |          |          |          |          |     |          |          |          |          |          |      |          |          |          |          |          |     |          |          |          |          |          |      |          |          |          |          |          |       |          |          |          |          |          |      |          |          |          |          |          |  |   |   |   |   |    |     |          |  |  |  |  |     |          |          |  |  |  |      |          |          |          |  |  |     |          |          |          |          |  |      |          |          |          |          |          |       |          |          |          |          |          |      |          |          |          |          |          |  |    |    |  |  |  |      |          |          |  |  |  |
| 3 B                                                                                                                             | 3.063591                                                                                                                                                                                                                                                                                                                                                                                                                                                                                                                                                                                                                                                                                                                                                                                                                                                                                                                                                                                                                                                                                                                                                                                                                                                                                                                                                                                                                                                                                                                                                                                                                                                                                                                                                                                                                                                                                                                                                                                                                                                                                                                                                                                                                                                                                                                            | 1.760416 | 0.000000 |          |          |   |   |      |          |  |  |  |  |     |          |          |  |  |  |     |          |          |          |  |  |      |          |          |          |          |  |     |          |          |          |          |          |     |          |          |          |          |          |     |          |          |          |          |          |      |          |          |          |          |          |     |          |          |          |          |          |      |          |          |          |          |          |       |          |          |          |          |          |      |          |          |          |          |          |  |   |   |   |   |    |     |          |  |  |  |  |     |          |          |  |  |  |      |          |          |          |  |  |     |          |          |          |          |  |      |          |          |          |          |          |       |          |          |          |          |          |      |          |          |          |          |          |  |    |    |  |  |  |      |          |          |  |  |  |
| 4 Se                                                                                                                            | 3.216003                                                                                                                                                                                                                                                                                                                                                                                                                                                                                                                                                                                                                                                                                                                                                                                                                                                                                                                                                                                                                                                                                                                                                                                                                                                                                                                                                                                                                                                                                                                                                                                                                                                                                                                                                                                                                                                                                                                                                                                                                                                                                                                                                                                                                                                                                                                            | 2.031168 | 3.216126 | 0.000000 |          |   |   |      |          |  |  |  |  |     |          |          |  |  |  |     |          |          |          |  |  |      |          |          |          |          |  |     |          |          |          |          |          |     |          |          |          |          |          |     |          |          |          |          |          |      |          |          |          |          |          |     |          |          |          |          |          |      |          |          |          |          |          |       |          |          |          |          |          |      |          |          |          |          |          |  |   |   |   |   |    |     |          |  |  |  |  |     |          |          |  |  |  |      |          |          |          |  |  |     |          |          |          |          |  |      |          |          |          |          |          |       |          |          |          |          |          |      |          |          |          |          |          |  |    |    |  |  |  |      |          |          |  |  |  |
| 5 B                                                                                                                             | 3.843840                                                                                                                                                                                                                                                                                                                                                                                                                                                                                                                                                                                                                                                                                                                                                                                                                                                                                                                                                                                                                                                                                                                                                                                                                                                                                                                                                                                                                                                                                                                                                                                                                                                                                                                                                                                                                                                                                                                                                                                                                                                                                                                                                                                                                                                                                                                            | 1.779863 | 3.000644 | 2.163519 | 0.000000 |   |   |      |          |  |  |  |  |     |          |          |  |  |  |     |          |          |          |  |  |      |          |          |          |          |  |     |          |          |          |          |          |     |          |          |          |          |          |     |          |          |          |          |          |      |          |          |          |          |          |     |          |          |          |          |          |      |          |          |          |          |          |       |          |          |          |          |          |      |          |          |          |          |          |  |   |   |   |   |    |     |          |  |  |  |  |     |          |          |  |  |  |      |          |          |          |  |  |     |          |          |          |          |  |      |          |          |          |          |          |       |          |          |          |          |          |      |          |          |          |          |          |  |    |    |  |  |  |      |          |          |  |  |  |
| 6 B                                                                                                                             | 3.520023                                                                                                                                                                                                                                                                                                                                                                                                                                                                                                                                                                                                                                                                                                                                                                                                                                                                                                                                                                                                                                                                                                                                                                                                                                                                                                                                                                                                                                                                                                                                                                                                                                                                                                                                                                                                                                                                                                                                                                                                                                                                                                                                                                                                                                                                                                                            | 1.710731 | 1.795116 | 3.118689 | 1.718009 |   |   |      |          |  |  |  |  |     |          |          |  |  |  |     |          |          |          |  |  |      |          |          |          |          |  |     |          |          |          |          |          |     |          |          |          |          |          |     |          |          |          |          |          |      |          |          |          |          |          |     |          |          |          |          |          |      |          |          |          |          |          |       |          |          |          |          |          |      |          |          |          |          |          |  |   |   |   |   |    |     |          |  |  |  |  |     |          |          |  |  |  |      |          |          |          |  |  |     |          |          |          |          |  |      |          |          |          |          |          |       |          |          |          |          |          |      |          |          |          |          |          |  |    |    |  |  |  |      |          |          |  |  |  |
| 7 B                                                                                                                             | 3.000612                                                                                                                                                                                                                                                                                                                                                                                                                                                                                                                                                                                                                                                                                                                                                                                                                                                                                                                                                                                                                                                                                                                                                                                                                                                                                                                                                                                                                                                                                                                                                                                                                                                                                                                                                                                                                                                                                                                                                                                                                                                                                                                                                                                                                                                                                                                            | 3.075424 | 3.843887 | 2.163506 | 1.883906 |   |   |      |          |  |  |  |  |     |          |          |  |  |  |     |          |          |          |  |  |      |          |          |          |          |  |     |          |          |          |          |          |     |          |          |          |          |          |     |          |          |          |          |          |      |          |          |          |          |          |     |          |          |          |          |          |      |          |          |          |          |          |       |          |          |          |          |          |      |          |          |          |          |          |  |   |   |   |   |    |     |          |  |  |  |  |     |          |          |  |  |  |      |          |          |          |  |  |     |          |          |          |          |  |      |          |          |          |          |          |       |          |          |          |          |          |      |          |          |          |          |          |  |    |    |  |  |  |      |          |          |  |  |  |
| 8 Se                                                                                                                            | 1.963790                                                                                                                                                                                                                                                                                                                                                                                                                                                                                                                                                                                                                                                                                                                                                                                                                                                                                                                                                                                                                                                                                                                                                                                                                                                                                                                                                                                                                                                                                                                                                                                                                                                                                                                                                                                                                                                                                                                                                                                                                                                                                                                                                                                                                                                                                                                            | 3.236697 | 1.963781 | 3.670324 | 4.243794 |   |   |      |          |  |  |  |  |     |          |          |  |  |  |     |          |          |          |  |  |      |          |          |          |          |  |     |          |          |          |          |          |     |          |          |          |          |          |     |          |          |          |          |          |      |          |          |          |          |          |     |          |          |          |          |          |      |          |          |          |          |          |       |          |          |          |          |          |      |          |          |          |          |          |  |   |   |   |   |    |     |          |  |  |  |  |     |          |          |  |  |  |      |          |          |          |  |  |     |          |          |          |          |  |      |          |          |          |          |          |       |          |          |          |          |          |      |          |          |          |          |          |  |    |    |  |  |  |      |          |          |  |  |  |
| 9 B                                                                                                                             | 1.760346                                                                                                                                                                                                                                                                                                                                                                                                                                                                                                                                                                                                                                                                                                                                                                                                                                                                                                                                                                                                                                                                                                                                                                                                                                                                                                                                                                                                                                                                                                                                                                                                                                                                                                                                                                                                                                                                                                                                                                                                                                                                                                                                                                                                                                                                                                                            | 3.339037 | 3.650872 | 2.031196 | 3.075464 |   |   |      |          |  |  |  |  |     |          |          |  |  |  |     |          |          |          |  |  |      |          |          |          |          |  |     |          |          |          |          |          |     |          |          |          |          |          |     |          |          |          |          |          |      |          |          |          |          |          |     |          |          |          |          |          |      |          |          |          |          |          |       |          |          |          |          |          |      |          |          |          |          |          |  |   |   |   |   |    |     |          |  |  |  |  |     |          |          |  |  |  |      |          |          |          |  |  |     |          |          |          |          |  |      |          |          |          |          |          |       |          |          |          |          |          |      |          |          |          |          |          |  |    |    |  |  |  |      |          |          |  |  |  |
| 10 B                                                                                                                            | 3.110961                                                                                                                                                                                                                                                                                                                                                                                                                                                                                                                                                                                                                                                                                                                                                                                                                                                                                                                                                                                                                                                                                                                                                                                                                                                                                                                                                                                                                                                                                                                                                                                                                                                                                                                                                                                                                                                                                                                                                                                                                                                                                                                                                                                                                                                                                                                            | 2.859719 | 3.110952 | 3.147294 | 1.748806 |   |   |      |          |  |  |  |  |     |          |          |  |  |  |     |          |          |          |  |  |      |          |          |          |          |  |     |          |          |          |          |          |     |          |          |          |          |          |     |          |          |          |          |          |      |          |          |          |          |          |     |          |          |          |          |          |      |          |          |          |          |          |       |          |          |          |          |          |      |          |          |          |          |          |  |   |   |   |   |    |     |          |  |  |  |  |     |          |          |  |  |  |      |          |          |          |  |  |     |          |          |          |          |  |      |          |          |          |          |          |       |          |          |          |          |          |      |          |          |          |          |          |  |    |    |  |  |  |      |          |          |  |  |  |
| 11 Co                                                                                                                           | 2.243220                                                                                                                                                                                                                                                                                                                                                                                                                                                                                                                                                                                                                                                                                                                                                                                                                                                                                                                                                                                                                                                                                                                                                                                                                                                                                                                                                                                                                                                                                                                                                                                                                                                                                                                                                                                                                                                                                                                                                                                                                                                                                                                                                                                                                                                                                                                            | 3.269428 | 2.243211 | 3.965317 | 3.338704 |   |   |      |          |  |  |  |  |     |          |          |  |  |  |     |          |          |          |  |  |      |          |          |          |          |  |     |          |          |          |          |          |     |          |          |          |          |          |     |          |          |          |          |          |      |          |          |          |          |          |     |          |          |          |          |          |      |          |          |          |          |          |       |          |          |          |          |          |      |          |          |          |          |          |  |   |   |   |   |    |     |          |  |  |  |  |     |          |          |  |  |  |      |          |          |          |  |  |     |          |          |          |          |  |      |          |          |          |          |          |       |          |          |          |          |          |      |          |          |          |          |          |  |    |    |  |  |  |      |          |          |  |  |  |
| 12 B                                                                                                                            | 1.795187                                                                                                                                                                                                                                                                                                                                                                                                                                                                                                                                                                                                                                                                                                                                                                                                                                                                                                                                                                                                                                                                                                                                                                                                                                                                                                                                                                                                                                                                                                                                                                                                                                                                                                                                                                                                                                                                                                                                                                                                                                                                                                                                                                                                                                                                                                                            | 3.594298 | 3.520062 | 3.118700 | 2.930763 |   |   |      |          |  |  |  |  |     |          |          |  |  |  |     |          |          |          |  |  |      |          |          |          |          |  |     |          |          |          |          |          |     |          |          |          |          |          |     |          |          |          |          |          |      |          |          |          |          |          |     |          |          |          |          |          |      |          |          |          |          |          |       |          |          |          |          |          |      |          |          |          |          |          |  |   |   |   |   |    |     |          |  |  |  |  |     |          |          |  |  |  |      |          |          |          |  |  |     |          |          |          |          |  |      |          |          |          |          |          |       |          |          |          |          |          |      |          |          |          |          |          |  |    |    |  |  |  |      |          |          |  |  |  |
|                                                                                                                                 | 6                                                                                                                                                                                                                                                                                                                                                                                                                                                                                                                                                                                                                                                                                                                                                                                                                                                                                                                                                                                                                                                                                                                                                                                                                                                                                                                                                                                                                                                                                                                                                                                                                                                                                                                                                                                                                                                                                                                                                                                                                                                                                                                                                                                                                                                                                                                                   | 7        | 8        | 9        | 10       |   |   |      |          |  |  |  |  |     |          |          |  |  |  |     |          |          |          |  |  |      |          |          |          |          |  |     |          |          |          |          |          |     |          |          |          |          |          |     |          |          |          |          |          |      |          |          |          |          |          |     |          |          |          |          |          |      |          |          |          |          |          |       |          |          |          |          |          |      |          |          |          |          |          |  |   |   |   |   |    |     |          |  |  |  |  |     |          |          |  |  |  |      |          |          |          |  |  |     |          |          |          |          |  |      |          |          |          |          |          |       |          |          |          |          |          |      |          |          |          |          |          |  |    |    |  |  |  |      |          |          |  |  |  |
| 6 B                                                                                                                             | 0.000000                                                                                                                                                                                                                                                                                                                                                                                                                                                                                                                                                                                                                                                                                                                                                                                                                                                                                                                                                                                                                                                                                                                                                                                                                                                                                                                                                                                                                                                                                                                                                                                                                                                                                                                                                                                                                                                                                                                                                                                                                                                                                                                                                                                                                                                                                                                            |          |          |          |          |   |   |      |          |  |  |  |  |     |          |          |  |  |  |     |          |          |          |  |  |      |          |          |          |          |  |     |          |          |          |          |          |     |          |          |          |          |          |     |          |          |          |          |          |      |          |          |          |          |          |     |          |          |          |          |          |      |          |          |          |          |          |       |          |          |          |          |          |      |          |          |          |          |          |  |   |   |   |   |    |     |          |  |  |  |  |     |          |          |  |  |  |      |          |          |          |  |  |     |          |          |          |          |  |      |          |          |          |          |          |       |          |          |          |          |          |      |          |          |          |          |          |  |    |    |  |  |  |      |          |          |  |  |  |
| 7 B                                                                                                                             | 2.930757                                                                                                                                                                                                                                                                                                                                                                                                                                                                                                                                                                                                                                                                                                                                                                                                                                                                                                                                                                                                                                                                                                                                                                                                                                                                                                                                                                                                                                                                                                                                                                                                                                                                                                                                                                                                                                                                                                                                                                                                                                                                                                                                                                                                                                                                                                                            | 0.000000 |          |          |          |   |   |      |          |  |  |  |  |     |          |          |  |  |  |     |          |          |          |  |  |      |          |          |          |          |  |     |          |          |          |          |          |     |          |          |          |          |          |     |          |          |          |          |          |      |          |          |          |          |          |     |          |          |          |          |          |      |          |          |          |          |          |       |          |          |          |          |          |      |          |          |          |          |          |  |   |   |   |   |    |     |          |  |  |  |  |     |          |          |  |  |  |      |          |          |          |  |  |     |          |          |          |          |  |      |          |          |          |          |          |       |          |          |          |          |          |      |          |          |          |          |          |  |    |    |  |  |  |      |          |          |  |  |  |
| 8 Se                                                                                                                            | 3.356231                                                                                                                                                                                                                                                                                                                                                                                                                                                                                                                                                                                                                                                                                                                                                                                                                                                                                                                                                                                                                                                                                                                                                                                                                                                                                                                                                                                                                                                                                                                                                                                                                                                                                                                                                                                                                                                                                                                                                                                                                                                                                                                                                                                                                                                                                                                            | 4.243808 | 0.000000 |          |          |   |   |      |          |  |  |  |  |     |          |          |  |  |  |     |          |          |          |  |  |      |          |          |          |          |  |     |          |          |          |          |          |     |          |          |          |          |          |     |          |          |          |          |          |      |          |          |          |          |          |     |          |          |          |          |          |      |          |          |          |          |          |       |          |          |          |          |          |      |          |          |          |          |          |  |   |   |   |   |    |     |          |  |  |  |  |     |          |          |  |  |  |      |          |          |          |  |  |     |          |          |          |          |  |      |          |          |          |          |          |       |          |          |          |          |          |      |          |          |          |          |          |  |    |    |  |  |  |      |          |          |  |  |  |
| 9 B                                                                                                                             | 3.594322                                                                                                                                                                                                                                                                                                                                                                                                                                                                                                                                                                                                                                                                                                                                                                                                                                                                                                                                                                                                                                                                                                                                                                                                                                                                                                                                                                                                                                                                                                                                                                                                                                                                                                                                                                                                                                                                                                                                                                                                                                                                                                                                                                                                                                                                                                                            | 1.779869 | 3.236769 | 0.000000 |          |   |   |      |          |  |  |  |  |     |          |          |  |  |  |     |          |          |          |  |  |      |          |          |          |          |  |     |          |          |          |          |          |     |          |          |          |          |          |     |          |          |          |          |          |      |          |          |          |          |          |     |          |          |          |          |          |      |          |          |          |          |          |       |          |          |          |          |          |      |          |          |          |          |          |  |   |   |   |   |    |     |          |  |  |  |  |     |          |          |  |  |  |      |          |          |          |  |  |     |          |          |          |          |  |      |          |          |          |          |          |       |          |          |          |          |          |      |          |          |          |          |          |  |    |    |  |  |  |      |          |          |  |  |  |
| 10 B                                                                                                                            | 1.753100                                                                                                                                                                                                                                                                                                                                                                                                                                                                                                                                                                                                                                                                                                                                                                                                                                                                                                                                                                                                                                                                                                                                                                                                                                                                                                                                                                                                                                                                                                                                                                                                                                                                                                                                                                                                                                                                                                                                                                                                                                                                                                                                                                                                                                                                                                                            | 1.748800 | 3.911207 | 2.859730 | 0.000000 |   |   |      |          |  |  |  |  |     |          |          |  |  |  |     |          |          |          |  |  |      |          |          |          |          |  |     |          |          |          |          |          |     |          |          |          |          |          |     |          |          |          |          |          |      |          |          |          |          |          |     |          |          |          |          |          |      |          |          |          |          |          |       |          |          |          |          |          |      |          |          |          |          |          |  |   |   |   |   |    |     |          |  |  |  |  |     |          |          |  |  |  |      |          |          |          |  |  |     |          |          |          |          |  |      |          |          |          |          |          |       |          |          |          |          |          |      |          |          |          |          |          |  |    |    |  |  |  |      |          |          |  |  |  |
| 11 Co                                                                                                                           | 2.175125                                                                                                                                                                                                                                                                                                                                                                                                                                                                                                                                                                                                                                                                                                                                                                                                                                                                                                                                                                                                                                                                                                                                                                                                                                                                                                                                                                                                                                                                                                                                                                                                                                                                                                                                                                                                                                                                                                                                                                                                                                                                                                                                                                                                                                                                                                                            | 3.338683 | 2.392033 | 3.269412 | 2.182257 |   |   |      |          |  |  |  |  |     |          |          |  |  |  |     |          |          |          |  |  |      |          |          |          |          |  |     |          |          |          |          |          |     |          |          |          |          |          |     |          |          |          |          |          |      |          |          |          |          |          |     |          |          |          |          |          |      |          |          |          |          |          |       |          |          |          |          |          |      |          |          |          |          |          |  |   |   |   |   |    |     |          |  |  |  |  |     |          |          |  |  |  |      |          |          |          |  |  |     |          |          |          |          |  |      |          |          |          |          |          |       |          |          |          |          |          |      |          |          |          |          |          |  |    |    |  |  |  |      |          |          |  |  |  |
| 12 B                                                                                                                            | 2.992609                                                                                                                                                                                                                                                                                                                                                                                                                                                                                                                                                                                                                                                                                                                                                                                                                                                                                                                                                                                                                                                                                                                                                                                                                                                                                                                                                                                                                                                                                                                                                                                                                                                                                                                                                                                                                                                                                                                                                                                                                                                                                                                                                                                                                                                                                                                            | 1.718011 | 3.356289 | 1.710750 | 1.753078 |   |   |      |          |  |  |  |  |     |          |          |  |  |  |     |          |          |          |  |  |      |          |          |          |          |  |     |          |          |          |          |          |     |          |          |          |          |          |     |          |          |          |          |          |      |          |          |          |          |          |     |          |          |          |          |          |      |          |          |          |          |          |       |          |          |          |          |          |      |          |          |          |          |          |  |   |   |   |   |    |     |          |  |  |  |  |     |          |          |  |  |  |      |          |          |          |  |  |     |          |          |          |          |  |      |          |          |          |          |          |       |          |          |          |          |          |      |          |          |          |          |          |  |    |    |  |  |  |      |          |          |  |  |  |
|                                                                                                                                 | 11                                                                                                                                                                                                                                                                                                                                                                                                                                                                                                                                                                                                                                                                                                                                                                                                                                                                                                                                                                                                                                                                                                                                                                                                                                                                                                                                                                                                                                                                                                                                                                                                                                                                                                                                                                                                                                                                                                                                                                                                                                                                                                                                                                                                                                                                                                                                  | 12       |          |          |          |   |   |      |          |  |  |  |  |     |          |          |  |  |  |     |          |          |          |  |  |      |          |          |          |          |  |     |          |          |          |          |          |     |          |          |          |          |          |     |          |          |          |          |          |      |          |          |          |          |          |     |          |          |          |          |          |      |          |          |          |          |          |       |          |          |          |          |          |      |          |          |          |          |          |  |   |   |   |   |    |     |          |  |  |  |  |     |          |          |  |  |  |      |          |          |          |  |  |     |          |          |          |          |  |      |          |          |          |          |          |       |          |          |          |          |          |      |          |          |          |          |          |  |    |    |  |  |  |      |          |          |  |  |  |
| 12 B                                                                                                                            | 2.175079                                                                                                                                                                                                                                                                                                                                                                                                                                                                                                                                                                                                                                                                                                                                                                                                                                                                                                                                                                                                                                                                                                                                                                                                                                                                                                                                                                                                                                                                                                                                                                                                                                                                                                                                                                                                                                                                                                                                                                                                                                                                                                                                                                                                                                                                                                                            | 0.000000 |          |          |          |   |   |      |          |  |  |  |  |     |          |          |  |  |  |     |          |          |          |  |  |      |          |          |          |          |  |     |          |          |          |          |          |     |          |          |          |          |          |     |          |          |          |          |          |      |          |          |          |          |          |     |          |          |          |          |          |      |          |          |          |          |          |       |          |          |          |          |          |      |          |          |          |          |          |  |   |   |   |   |    |     |          |  |  |  |  |     |          |          |  |  |  |      |          |          |          |  |  |     |          |          |          |          |  |      |          |          |          |          |          |       |          |          |          |          |          |      |          |          |          |          |          |  |    |    |  |  |  |      |          |          |  |  |  |
|  <p>6. -6608.2506285 +13.6 C<sub>1</sub></p> | <table border="1"> <thead> <tr> <th></th> <th>1</th> <th>2</th> <th>3</th> <th>4</th> <th>5</th> </tr> </thead> <tbody> <tr><td>1 Se</td><td>0.000000</td><td></td><td></td><td></td><td></td></tr> <tr><td>2 B</td><td>4.017614</td><td>0.000000</td><td></td><td></td><td></td></tr> <tr><td>3 B</td><td>2.823412</td><td>2.898173</td><td>0.000000</td><td></td><td></td></tr> <tr><td>4 Se</td><td>3.268337</td><td>3.230090</td><td>2.002443</td><td>0.000000</td><td></td></tr> <tr><td>5 B</td><td>4.024595</td><td>1.751277</td><td>1.904821</td><td>2.020137</td><td>0.000000</td></tr> <tr><td>6 B</td><td>3.526435</td><td>1.809356</td><td>1.707277</td><td>3.136805</td><td>1.777629</td></tr> <tr><td>7 B</td><td>2.041606</td><td>2.987057</td><td>3.433645</td><td>4.013578</td><td>3.879974</td></tr> <tr><td>8 Co</td><td>3.573416</td><td>2.020842</td><td>3.362908</td><td>4.420129</td><td>3.305391</td></tr> <tr><td>9 B</td><td>2.016516</td><td>2.987574</td><td>3.215527</td><td>2.779358</td><td>3.359120</td></tr> <tr><td>10 B</td><td>3.161064</td><td>1.787968</td><td>3.494629</td><td>3.505022</td><td>3.014714</td></tr> <tr><td>11 B</td><td>3.465169</td><td>1.796217</td><td>2.858365</td><td>2.060448</td><td>1.893197</td></tr> <tr><td>12 B</td><td>2.080878</td><td>2.885691</td><td>1.949506</td><td>3.433396</td><td>3.071389</td></tr> <tr> <th></th> <th>6</th> <th>7</th> <th>8</th> <th>9</th> <th>10</th> </tr> <tr><td>6 B</td><td>0.000000</td><td></td><td></td><td></td><td></td></tr> <tr><td>7 B</td><td>3.086859</td><td>0.000000</td><td></td><td></td><td></td></tr> <tr><td>8 Co</td><td>2.054118</td><td>2.018292</td><td>0.000000</td><td></td><td></td></tr> <tr><td>9 B</td><td>3.483316</td><td>1.871032</td><td>3.263973</td><td>0.000000</td><td></td></tr> <tr><td>10 B</td><td>2.891163</td><td>1.757760</td><td>2.079696</td><td>1.717271</td><td>0.000000</td></tr> <tr><td>11 B</td><td>2.836298</td><td>3.072405</td><td>3.266538</td><td>1.948649</td><td>1.794671</td></tr> <tr><td>12 B</td><td>1.787258</td><td>1.990611</td><td>2.074005</td><td>2.859351</td><td>2.845945</td></tr> <tr> <th></th> <th>11</th> <th>12</th> <th colspan="3"></th> </tr> <tr><td>12 B</td><td>3.319151</td><td>0.000000</td><td colspan="3"></td></tr> </tbody> </table>  |          | 1        | 2        | 3        | 4 | 5 | 1 Se | 0.000000 |  |  |  |  | 2 B | 4.017614 | 0.000000 |  |  |  | 3 B | 2.823412 | 2.898173 | 0.000000 |  |  | 4 Se | 3.268337 | 3.230090 | 2.002443 | 0.000000 |  | 5 B | 4.024595 | 1.751277 | 1.904821 | 2.020137 | 0.000000 | 6 B | 3.526435 | 1.809356 | 1.707277 | 3.136805 | 1.777629 | 7 B | 2.041606 | 2.987057 | 3.433645 | 4.013578 | 3.879974 | 8 Co | 3.573416 | 2.020842 | 3.362908 | 4.420129 | 3.305391 | 9 B | 2.016516 | 2.987574 | 3.215527 | 2.779358 | 3.359120 | 10 B | 3.161064 | 1.787968 | 3.494629 | 3.505022 | 3.014714 | 11 B  | 3.465169 | 1.796217 | 2.858365 | 2.060448 | 1.893197 | 12 B | 2.080878 | 2.885691 | 1.949506 | 3.433396 | 3.071389 |  | 6 | 7 | 8 | 9 | 10 | 6 B | 0.000000 |  |  |  |  | 7 B | 3.086859 | 0.000000 |  |  |  | 8 Co | 2.054118 | 2.018292 | 0.000000 |  |  | 9 B | 3.483316 | 1.871032 | 3.263973 | 0.000000 |  | 10 B | 2.891163 | 1.757760 | 2.079696 | 1.717271 | 0.000000 | 11 B  | 2.836298 | 3.072405 | 3.266538 | 1.948649 | 1.794671 | 12 B | 1.787258 | 1.990611 | 2.074005 | 2.859351 | 2.845945 |  | 11 | 12 |  |  |  | 12 B | 3.319151 | 0.000000 |  |  |  |
|                                                                                                                                 | 1                                                                                                                                                                                                                                                                                                                                                                                                                                                                                                                                                                                                                                                                                                                                                                                                                                                                                                                                                                                                                                                                                                                                                                                                                                                                                                                                                                                                                                                                                                                                                                                                                                                                                                                                                                                                                                                                                                                                                                                                                                                                                                                                                                                                                                                                                                                                   | 2        | 3        | 4        | 5        |   |   |      |          |  |  |  |  |     |          |          |  |  |  |     |          |          |          |  |  |      |          |          |          |          |  |     |          |          |          |          |          |     |          |          |          |          |          |     |          |          |          |          |          |      |          |          |          |          |          |     |          |          |          |          |          |      |          |          |          |          |          |       |          |          |          |          |          |      |          |          |          |          |          |  |   |   |   |   |    |     |          |  |  |  |  |     |          |          |  |  |  |      |          |          |          |  |  |     |          |          |          |          |  |      |          |          |          |          |          |       |          |          |          |          |          |      |          |          |          |          |          |  |    |    |  |  |  |      |          |          |  |  |  |
| 1 Se                                                                                                                            | 0.000000                                                                                                                                                                                                                                                                                                                                                                                                                                                                                                                                                                                                                                                                                                                                                                                                                                                                                                                                                                                                                                                                                                                                                                                                                                                                                                                                                                                                                                                                                                                                                                                                                                                                                                                                                                                                                                                                                                                                                                                                                                                                                                                                                                                                                                                                                                                            |          |          |          |          |   |   |      |          |  |  |  |  |     |          |          |  |  |  |     |          |          |          |  |  |      |          |          |          |          |  |     |          |          |          |          |          |     |          |          |          |          |          |     |          |          |          |          |          |      |          |          |          |          |          |     |          |          |          |          |          |      |          |          |          |          |          |       |          |          |          |          |          |      |          |          |          |          |          |  |   |   |   |   |    |     |          |  |  |  |  |     |          |          |  |  |  |      |          |          |          |  |  |     |          |          |          |          |  |      |          |          |          |          |          |       |          |          |          |          |          |      |          |          |          |          |          |  |    |    |  |  |  |      |          |          |  |  |  |
| 2 B                                                                                                                             | 4.017614                                                                                                                                                                                                                                                                                                                                                                                                                                                                                                                                                                                                                                                                                                                                                                                                                                                                                                                                                                                                                                                                                                                                                                                                                                                                                                                                                                                                                                                                                                                                                                                                                                                                                                                                                                                                                                                                                                                                                                                                                                                                                                                                                                                                                                                                                                                            | 0.000000 |          |          |          |   |   |      |          |  |  |  |  |     |          |          |  |  |  |     |          |          |          |  |  |      |          |          |          |          |  |     |          |          |          |          |          |     |          |          |          |          |          |     |          |          |          |          |          |      |          |          |          |          |          |     |          |          |          |          |          |      |          |          |          |          |          |       |          |          |          |          |          |      |          |          |          |          |          |  |   |   |   |   |    |     |          |  |  |  |  |     |          |          |  |  |  |      |          |          |          |  |  |     |          |          |          |          |  |      |          |          |          |          |          |       |          |          |          |          |          |      |          |          |          |          |          |  |    |    |  |  |  |      |          |          |  |  |  |
| 3 B                                                                                                                             | 2.823412                                                                                                                                                                                                                                                                                                                                                                                                                                                                                                                                                                                                                                                                                                                                                                                                                                                                                                                                                                                                                                                                                                                                                                                                                                                                                                                                                                                                                                                                                                                                                                                                                                                                                                                                                                                                                                                                                                                                                                                                                                                                                                                                                                                                                                                                                                                            | 2.898173 | 0.000000 |          |          |   |   |      |          |  |  |  |  |     |          |          |  |  |  |     |          |          |          |  |  |      |          |          |          |          |  |     |          |          |          |          |          |     |          |          |          |          |          |     |          |          |          |          |          |      |          |          |          |          |          |     |          |          |          |          |          |      |          |          |          |          |          |       |          |          |          |          |          |      |          |          |          |          |          |  |   |   |   |   |    |     |          |  |  |  |  |     |          |          |  |  |  |      |          |          |          |  |  |     |          |          |          |          |  |      |          |          |          |          |          |       |          |          |          |          |          |      |          |          |          |          |          |  |    |    |  |  |  |      |          |          |  |  |  |
| 4 Se                                                                                                                            | 3.268337                                                                                                                                                                                                                                                                                                                                                                                                                                                                                                                                                                                                                                                                                                                                                                                                                                                                                                                                                                                                                                                                                                                                                                                                                                                                                                                                                                                                                                                                                                                                                                                                                                                                                                                                                                                                                                                                                                                                                                                                                                                                                                                                                                                                                                                                                                                            | 3.230090 | 2.002443 | 0.000000 |          |   |   |      |          |  |  |  |  |     |          |          |  |  |  |     |          |          |          |  |  |      |          |          |          |          |  |     |          |          |          |          |          |     |          |          |          |          |          |     |          |          |          |          |          |      |          |          |          |          |          |     |          |          |          |          |          |      |          |          |          |          |          |       |          |          |          |          |          |      |          |          |          |          |          |  |   |   |   |   |    |     |          |  |  |  |  |     |          |          |  |  |  |      |          |          |          |  |  |     |          |          |          |          |  |      |          |          |          |          |          |       |          |          |          |          |          |      |          |          |          |          |          |  |    |    |  |  |  |      |          |          |  |  |  |
| 5 B                                                                                                                             | 4.024595                                                                                                                                                                                                                                                                                                                                                                                                                                                                                                                                                                                                                                                                                                                                                                                                                                                                                                                                                                                                                                                                                                                                                                                                                                                                                                                                                                                                                                                                                                                                                                                                                                                                                                                                                                                                                                                                                                                                                                                                                                                                                                                                                                                                                                                                                                                            | 1.751277 | 1.904821 | 2.020137 | 0.000000 |   |   |      |          |  |  |  |  |     |          |          |  |  |  |     |          |          |          |  |  |      |          |          |          |          |  |     |          |          |          |          |          |     |          |          |          |          |          |     |          |          |          |          |          |      |          |          |          |          |          |     |          |          |          |          |          |      |          |          |          |          |          |       |          |          |          |          |          |      |          |          |          |          |          |  |   |   |   |   |    |     |          |  |  |  |  |     |          |          |  |  |  |      |          |          |          |  |  |     |          |          |          |          |  |      |          |          |          |          |          |       |          |          |          |          |          |      |          |          |          |          |          |  |    |    |  |  |  |      |          |          |  |  |  |
| 6 B                                                                                                                             | 3.526435                                                                                                                                                                                                                                                                                                                                                                                                                                                                                                                                                                                                                                                                                                                                                                                                                                                                                                                                                                                                                                                                                                                                                                                                                                                                                                                                                                                                                                                                                                                                                                                                                                                                                                                                                                                                                                                                                                                                                                                                                                                                                                                                                                                                                                                                                                                            | 1.809356 | 1.707277 | 3.136805 | 1.777629 |   |   |      |          |  |  |  |  |     |          |          |  |  |  |     |          |          |          |  |  |      |          |          |          |          |  |     |          |          |          |          |          |     |          |          |          |          |          |     |          |          |          |          |          |      |          |          |          |          |          |     |          |          |          |          |          |      |          |          |          |          |          |       |          |          |          |          |          |      |          |          |          |          |          |  |   |   |   |   |    |     |          |  |  |  |  |     |          |          |  |  |  |      |          |          |          |  |  |     |          |          |          |          |  |      |          |          |          |          |          |       |          |          |          |          |          |      |          |          |          |          |          |  |    |    |  |  |  |      |          |          |  |  |  |
| 7 B                                                                                                                             | 2.041606                                                                                                                                                                                                                                                                                                                                                                                                                                                                                                                                                                                                                                                                                                                                                                                                                                                                                                                                                                                                                                                                                                                                                                                                                                                                                                                                                                                                                                                                                                                                                                                                                                                                                                                                                                                                                                                                                                                                                                                                                                                                                                                                                                                                                                                                                                                            | 2.987057 | 3.433645 | 4.013578 | 3.879974 |   |   |      |          |  |  |  |  |     |          |          |  |  |  |     |          |          |          |  |  |      |          |          |          |          |  |     |          |          |          |          |          |     |          |          |          |          |          |     |          |          |          |          |          |      |          |          |          |          |          |     |          |          |          |          |          |      |          |          |          |          |          |       |          |          |          |          |          |      |          |          |          |          |          |  |   |   |   |   |    |     |          |  |  |  |  |     |          |          |  |  |  |      |          |          |          |  |  |     |          |          |          |          |  |      |          |          |          |          |          |       |          |          |          |          |          |      |          |          |          |          |          |  |    |    |  |  |  |      |          |          |  |  |  |
| 8 Co                                                                                                                            | 3.573416                                                                                                                                                                                                                                                                                                                                                                                                                                                                                                                                                                                                                                                                                                                                                                                                                                                                                                                                                                                                                                                                                                                                                                                                                                                                                                                                                                                                                                                                                                                                                                                                                                                                                                                                                                                                                                                                                                                                                                                                                                                                                                                                                                                                                                                                                                                            | 2.020842 | 3.362908 | 4.420129 | 3.305391 |   |   |      |          |  |  |  |  |     |          |          |  |  |  |     |          |          |          |  |  |      |          |          |          |          |  |     |          |          |          |          |          |     |          |          |          |          |          |     |          |          |          |          |          |      |          |          |          |          |          |     |          |          |          |          |          |      |          |          |          |          |          |       |          |          |          |          |          |      |          |          |          |          |          |  |   |   |   |   |    |     |          |  |  |  |  |     |          |          |  |  |  |      |          |          |          |  |  |     |          |          |          |          |  |      |          |          |          |          |          |       |          |          |          |          |          |      |          |          |          |          |          |  |    |    |  |  |  |      |          |          |  |  |  |
| 9 B                                                                                                                             | 2.016516                                                                                                                                                                                                                                                                                                                                                                                                                                                                                                                                                                                                                                                                                                                                                                                                                                                                                                                                                                                                                                                                                                                                                                                                                                                                                                                                                                                                                                                                                                                                                                                                                                                                                                                                                                                                                                                                                                                                                                                                                                                                                                                                                                                                                                                                                                                            | 2.987574 | 3.215527 | 2.779358 | 3.359120 |   |   |      |          |  |  |  |  |     |          |          |  |  |  |     |          |          |          |  |  |      |          |          |          |          |  |     |          |          |          |          |          |     |          |          |          |          |          |     |          |          |          |          |          |      |          |          |          |          |          |     |          |          |          |          |          |      |          |          |          |          |          |       |          |          |          |          |          |      |          |          |          |          |          |  |   |   |   |   |    |     |          |  |  |  |  |     |          |          |  |  |  |      |          |          |          |  |  |     |          |          |          |          |  |      |          |          |          |          |          |       |          |          |          |          |          |      |          |          |          |          |          |  |    |    |  |  |  |      |          |          |  |  |  |
| 10 B                                                                                                                            | 3.161064                                                                                                                                                                                                                                                                                                                                                                                                                                                                                                                                                                                                                                                                                                                                                                                                                                                                                                                                                                                                                                                                                                                                                                                                                                                                                                                                                                                                                                                                                                                                                                                                                                                                                                                                                                                                                                                                                                                                                                                                                                                                                                                                                                                                                                                                                                                            | 1.787968 | 3.494629 | 3.505022 | 3.014714 |   |   |      |          |  |  |  |  |     |          |          |  |  |  |     |          |          |          |  |  |      |          |          |          |          |  |     |          |          |          |          |          |     |          |          |          |          |          |     |          |          |          |          |          |      |          |          |          |          |          |     |          |          |          |          |          |      |          |          |          |          |          |       |          |          |          |          |          |      |          |          |          |          |          |  |   |   |   |   |    |     |          |  |  |  |  |     |          |          |  |  |  |      |          |          |          |  |  |     |          |          |          |          |  |      |          |          |          |          |          |       |          |          |          |          |          |      |          |          |          |          |          |  |    |    |  |  |  |      |          |          |  |  |  |
| 11 B                                                                                                                            | 3.465169                                                                                                                                                                                                                                                                                                                                                                                                                                                                                                                                                                                                                                                                                                                                                                                                                                                                                                                                                                                                                                                                                                                                                                                                                                                                                                                                                                                                                                                                                                                                                                                                                                                                                                                                                                                                                                                                                                                                                                                                                                                                                                                                                                                                                                                                                                                            | 1.796217 | 2.858365 | 2.060448 | 1.893197 |   |   |      |          |  |  |  |  |     |          |          |  |  |  |     |          |          |          |  |  |      |          |          |          |          |  |     |          |          |          |          |          |     |          |          |          |          |          |     |          |          |          |          |          |      |          |          |          |          |          |     |          |          |          |          |          |      |          |          |          |          |          |       |          |          |          |          |          |      |          |          |          |          |          |  |   |   |   |   |    |     |          |  |  |  |  |     |          |          |  |  |  |      |          |          |          |  |  |     |          |          |          |          |  |      |          |          |          |          |          |       |          |          |          |          |          |      |          |          |          |          |          |  |    |    |  |  |  |      |          |          |  |  |  |
| 12 B                                                                                                                            | 2.080878                                                                                                                                                                                                                                                                                                                                                                                                                                                                                                                                                                                                                                                                                                                                                                                                                                                                                                                                                                                                                                                                                                                                                                                                                                                                                                                                                                                                                                                                                                                                                                                                                                                                                                                                                                                                                                                                                                                                                                                                                                                                                                                                                                                                                                                                                                                            | 2.885691 | 1.949506 | 3.433396 | 3.071389 |   |   |      |          |  |  |  |  |     |          |          |  |  |  |     |          |          |          |  |  |      |          |          |          |          |  |     |          |          |          |          |          |     |          |          |          |          |          |     |          |          |          |          |          |      |          |          |          |          |          |     |          |          |          |          |          |      |          |          |          |          |          |       |          |          |          |          |          |      |          |          |          |          |          |  |   |   |   |   |    |     |          |  |  |  |  |     |          |          |  |  |  |      |          |          |          |  |  |     |          |          |          |          |  |      |          |          |          |          |          |       |          |          |          |          |          |      |          |          |          |          |          |  |    |    |  |  |  |      |          |          |  |  |  |
|                                                                                                                                 | 6                                                                                                                                                                                                                                                                                                                                                                                                                                                                                                                                                                                                                                                                                                                                                                                                                                                                                                                                                                                                                                                                                                                                                                                                                                                                                                                                                                                                                                                                                                                                                                                                                                                                                                                                                                                                                                                                                                                                                                                                                                                                                                                                                                                                                                                                                                                                   | 7        | 8        | 9        | 10       |   |   |      |          |  |  |  |  |     |          |          |  |  |  |     |          |          |          |  |  |      |          |          |          |          |  |     |          |          |          |          |          |     |          |          |          |          |          |     |          |          |          |          |          |      |          |          |          |          |          |     |          |          |          |          |          |      |          |          |          |          |          |       |          |          |          |          |          |      |          |          |          |          |          |  |   |   |   |   |    |     |          |  |  |  |  |     |          |          |  |  |  |      |          |          |          |  |  |     |          |          |          |          |  |      |          |          |          |          |          |       |          |          |          |          |          |      |          |          |          |          |          |  |    |    |  |  |  |      |          |          |  |  |  |
| 6 B                                                                                                                             | 0.000000                                                                                                                                                                                                                                                                                                                                                                                                                                                                                                                                                                                                                                                                                                                                                                                                                                                                                                                                                                                                                                                                                                                                                                                                                                                                                                                                                                                                                                                                                                                                                                                                                                                                                                                                                                                                                                                                                                                                                                                                                                                                                                                                                                                                                                                                                                                            |          |          |          |          |   |   |      |          |  |  |  |  |     |          |          |  |  |  |     |          |          |          |  |  |      |          |          |          |          |  |     |          |          |          |          |          |     |          |          |          |          |          |     |          |          |          |          |          |      |          |          |          |          |          |     |          |          |          |          |          |      |          |          |          |          |          |       |          |          |          |          |          |      |          |          |          |          |          |  |   |   |   |   |    |     |          |  |  |  |  |     |          |          |  |  |  |      |          |          |          |  |  |     |          |          |          |          |  |      |          |          |          |          |          |       |          |          |          |          |          |      |          |          |          |          |          |  |    |    |  |  |  |      |          |          |  |  |  |
| 7 B                                                                                                                             | 3.086859                                                                                                                                                                                                                                                                                                                                                                                                                                                                                                                                                                                                                                                                                                                                                                                                                                                                                                                                                                                                                                                                                                                                                                                                                                                                                                                                                                                                                                                                                                                                                                                                                                                                                                                                                                                                                                                                                                                                                                                                                                                                                                                                                                                                                                                                                                                            | 0.000000 |          |          |          |   |   |      |          |  |  |  |  |     |          |          |  |  |  |     |          |          |          |  |  |      |          |          |          |          |  |     |          |          |          |          |          |     |          |          |          |          |          |     |          |          |          |          |          |      |          |          |          |          |          |     |          |          |          |          |          |      |          |          |          |          |          |       |          |          |          |          |          |      |          |          |          |          |          |  |   |   |   |   |    |     |          |  |  |  |  |     |          |          |  |  |  |      |          |          |          |  |  |     |          |          |          |          |  |      |          |          |          |          |          |       |          |          |          |          |          |      |          |          |          |          |          |  |    |    |  |  |  |      |          |          |  |  |  |
| 8 Co                                                                                                                            | 2.054118                                                                                                                                                                                                                                                                                                                                                                                                                                                                                                                                                                                                                                                                                                                                                                                                                                                                                                                                                                                                                                                                                                                                                                                                                                                                                                                                                                                                                                                                                                                                                                                                                                                                                                                                                                                                                                                                                                                                                                                                                                                                                                                                                                                                                                                                                                                            | 2.018292 | 0.000000 |          |          |   |   |      |          |  |  |  |  |     |          |          |  |  |  |     |          |          |          |  |  |      |          |          |          |          |  |     |          |          |          |          |          |     |          |          |          |          |          |     |          |          |          |          |          |      |          |          |          |          |          |     |          |          |          |          |          |      |          |          |          |          |          |       |          |          |          |          |          |      |          |          |          |          |          |  |   |   |   |   |    |     |          |  |  |  |  |     |          |          |  |  |  |      |          |          |          |  |  |     |          |          |          |          |  |      |          |          |          |          |          |       |          |          |          |          |          |      |          |          |          |          |          |  |    |    |  |  |  |      |          |          |  |  |  |
| 9 B                                                                                                                             | 3.483316                                                                                                                                                                                                                                                                                                                                                                                                                                                                                                                                                                                                                                                                                                                                                                                                                                                                                                                                                                                                                                                                                                                                                                                                                                                                                                                                                                                                                                                                                                                                                                                                                                                                                                                                                                                                                                                                                                                                                                                                                                                                                                                                                                                                                                                                                                                            | 1.871032 | 3.263973 | 0.000000 |          |   |   |      |          |  |  |  |  |     |          |          |  |  |  |     |          |          |          |  |  |      |          |          |          |          |  |     |          |          |          |          |          |     |          |          |          |          |          |     |          |          |          |          |          |      |          |          |          |          |          |     |          |          |          |          |          |      |          |          |          |          |          |       |          |          |          |          |          |      |          |          |          |          |          |  |   |   |   |   |    |     |          |  |  |  |  |     |          |          |  |  |  |      |          |          |          |  |  |     |          |          |          |          |  |      |          |          |          |          |          |       |          |          |          |          |          |      |          |          |          |          |          |  |    |    |  |  |  |      |          |          |  |  |  |
| 10 B                                                                                                                            | 2.891163                                                                                                                                                                                                                                                                                                                                                                                                                                                                                                                                                                                                                                                                                                                                                                                                                                                                                                                                                                                                                                                                                                                                                                                                                                                                                                                                                                                                                                                                                                                                                                                                                                                                                                                                                                                                                                                                                                                                                                                                                                                                                                                                                                                                                                                                                                                            | 1.757760 | 2.079696 | 1.717271 | 0.000000 |   |   |      |          |  |  |  |  |     |          |          |  |  |  |     |          |          |          |  |  |      |          |          |          |          |  |     |          |          |          |          |          |     |          |          |          |          |          |     |          |          |          |          |          |      |          |          |          |          |          |     |          |          |          |          |          |      |          |          |          |          |          |       |          |          |          |          |          |      |          |          |          |          |          |  |   |   |   |   |    |     |          |  |  |  |  |     |          |          |  |  |  |      |          |          |          |  |  |     |          |          |          |          |  |      |          |          |          |          |          |       |          |          |          |          |          |      |          |          |          |          |          |  |    |    |  |  |  |      |          |          |  |  |  |
| 11 B                                                                                                                            | 2.836298                                                                                                                                                                                                                                                                                                                                                                                                                                                                                                                                                                                                                                                                                                                                                                                                                                                                                                                                                                                                                                                                                                                                                                                                                                                                                                                                                                                                                                                                                                                                                                                                                                                                                                                                                                                                                                                                                                                                                                                                                                                                                                                                                                                                                                                                                                                            | 3.072405 | 3.266538 | 1.948649 | 1.794671 |   |   |      |          |  |  |  |  |     |          |          |  |  |  |     |          |          |          |  |  |      |          |          |          |          |  |     |          |          |          |          |          |     |          |          |          |          |          |     |          |          |          |          |          |      |          |          |          |          |          |     |          |          |          |          |          |      |          |          |          |          |          |       |          |          |          |          |          |      |          |          |          |          |          |  |   |   |   |   |    |     |          |  |  |  |  |     |          |          |  |  |  |      |          |          |          |  |  |     |          |          |          |          |  |      |          |          |          |          |          |       |          |          |          |          |          |      |          |          |          |          |          |  |    |    |  |  |  |      |          |          |  |  |  |
| 12 B                                                                                                                            | 1.787258                                                                                                                                                                                                                                                                                                                                                                                                                                                                                                                                                                                                                                                                                                                                                                                                                                                                                                                                                                                                                                                                                                                                                                                                                                                                                                                                                                                                                                                                                                                                                                                                                                                                                                                                                                                                                                                                                                                                                                                                                                                                                                                                                                                                                                                                                                                            | 1.990611 | 2.074005 | 2.859351 | 2.845945 |   |   |      |          |  |  |  |  |     |          |          |  |  |  |     |          |          |          |  |  |      |          |          |          |          |  |     |          |          |          |          |          |     |          |          |          |          |          |     |          |          |          |          |          |      |          |          |          |          |          |     |          |          |          |          |          |      |          |          |          |          |          |       |          |          |          |          |          |      |          |          |          |          |          |  |   |   |   |   |    |     |          |  |  |  |  |     |          |          |  |  |  |      |          |          |          |  |  |     |          |          |          |          |  |      |          |          |          |          |          |       |          |          |          |          |          |      |          |          |          |          |          |  |    |    |  |  |  |      |          |          |  |  |  |
|                                                                                                                                 | 11                                                                                                                                                                                                                                                                                                                                                                                                                                                                                                                                                                                                                                                                                                                                                                                                                                                                                                                                                                                                                                                                                                                                                                                                                                                                                                                                                                                                                                                                                                                                                                                                                                                                                                                                                                                                                                                                                                                                                                                                                                                                                                                                                                                                                                                                                                                                  | 12       |          |          |          |   |   |      |          |  |  |  |  |     |          |          |  |  |  |     |          |          |          |  |  |      |          |          |          |          |  |     |          |          |          |          |          |     |          |          |          |          |          |     |          |          |          |          |          |      |          |          |          |          |          |     |          |          |          |          |          |      |          |          |          |          |          |       |          |          |          |          |          |      |          |          |          |          |          |  |   |   |   |   |    |     |          |  |  |  |  |     |          |          |  |  |  |      |          |          |          |  |  |     |          |          |          |          |  |      |          |          |          |          |          |       |          |          |          |          |          |      |          |          |          |          |          |  |    |    |  |  |  |      |          |          |  |  |  |
| 12 B                                                                                                                            | 3.319151                                                                                                                                                                                                                                                                                                                                                                                                                                                                                                                                                                                                                                                                                                                                                                                                                                                                                                                                                                                                                                                                                                                                                                                                                                                                                                                                                                                                                                                                                                                                                                                                                                                                                                                                                                                                                                                                                                                                                                                                                                                                                                                                                                                                                                                                                                                            | 0.000000 |          |          |          |   |   |      |          |  |  |  |  |     |          |          |  |  |  |     |          |          |          |  |  |      |          |          |          |          |  |     |          |          |          |          |          |     |          |          |          |          |          |     |          |          |          |          |          |      |          |          |          |          |          |     |          |          |          |          |          |      |          |          |          |          |          |       |          |          |          |          |          |      |          |          |          |          |          |  |   |   |   |   |    |     |          |  |  |  |  |     |          |          |  |  |  |      |          |          |          |  |  |     |          |          |          |          |  |      |          |          |          |          |          |       |          |          |          |          |          |      |          |          |          |          |          |  |    |    |  |  |  |      |          |          |  |  |  |

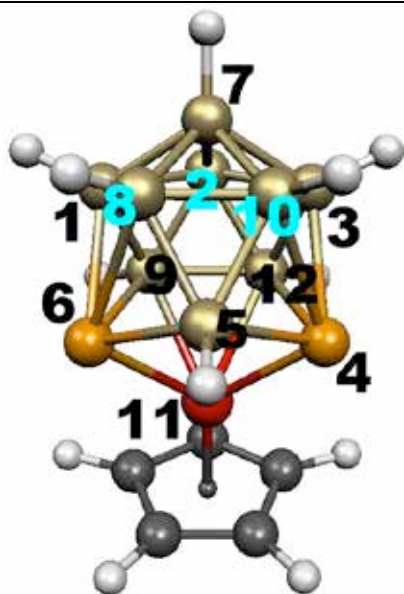

7. -6608.2386318 +21.1 C<sub>S</sub>

|       | 1        | 2        | 3        | 4        | 5        |
|-------|----------|----------|----------|----------|----------|
| 1 B   | 0.000000 |          |          |          |          |
| 2 B   | 1.776927 | 0.000000 |          |          |          |
| 3 B   | 2.851065 | 1.776907 | 0.000000 |          |          |
| 4 Se  | 3.679535 | 3.235639 | 2.152603 | 0.000000 |          |
| 5 B   | 2.938989 | 3.540102 | 2.939081 | 2.061295 | 0.000000 |
| 6 Se  | 2.152511 | 3.235569 | 3.679544 | 3.123572 | 2.061307 |
| 7 B   | 1.792365 | 1.787638 | 1.792405 | 3.324575 | 2.886216 |
| 8 B   | 1.839796 | 2.914657 | 2.853106 | 3.288391 | 1.819625 |
| 9 B   | 1.859044 | 1.713189 | 2.894521 | 3.202845 | 3.364170 |
| 10 B  | 2.852977 | 2.914631 | 1.839884 | 2.367228 | 1.819550 |
| 11 Co | 3.488277 | 3.327055 | 3.488258 | 2.358558 | 3.065328 |
| 12 B  | 2.894530 | 1.713187 | 1.858979 | 2.205758 | 3.364171 |
|       | 6        | 7        | 8        | 9        | 10       |
| 6 Se  | 0.000000 |          |          |          |          |
| 7 B   | 3.324545 | 0.000000 |          |          |          |
| 8 B   | 2.367288 | 1.692213 | 0.000000 |          |          |
| 9 B   | 2.205691 | 2.974523 | 3.229286 | 0.000000 |          |
| 10 B  | 3.288298 | 1.692210 | 1.667739 | 3.647904 | 0.000000 |
| 11 Co | 2.358563 | 4.215637 | 4.013450 | 2.107124 | 4.013356 |
| 12 B  | 3.202796 | 2.974505 | 3.647964 | 1.726497 | 3.229220 |
|       | 11       | 12       |          |          |          |
| 12 B  | 2.107117 | 0.000000 |          |          |          |

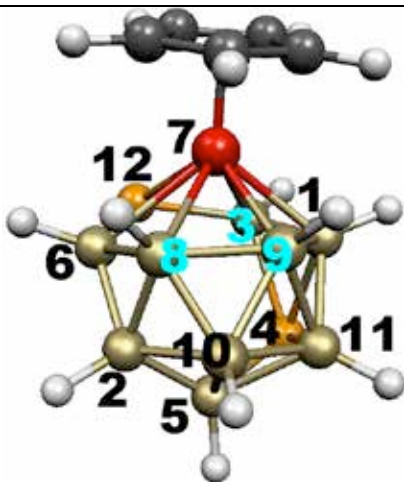

8. -6608.2365415 +22.4 C<sub>1</sub>

|       | 1        | 2        | 3        | 4        | 5        |
|-------|----------|----------|----------|----------|----------|
| 1 B   | 0.000000 |          |          |          |          |
| 2 B   | 3.579888 | 0.000000 |          |          |          |
| 3 B   | 1.852125 | 3.688167 | 0.000000 |          |          |
| 4 Se  | 2.115300 | 3.342412 | 2.082459 | 0.000000 |          |
| 5 B   | 3.013914 | 1.687584 | 3.330482 | 2.074766 | 0.000000 |
| 6 B   | 3.537521 | 1.735290 | 3.032403 | 3.698705 | 2.929157 |
| 7 Co  | 2.148112 | 3.335352 | 2.138473 | 3.556448 | 3.782404 |
| 8 B   | 3.016492 | 1.721736 | 3.530871 | 3.826065 | 2.782294 |
| 9 B   | 1.727914 | 2.845249 | 3.104367 | 3.184635 | 2.863129 |
| 10 B  | 2.924643 | 1.732174 | 3.894136 | 3.232266 | 1.788541 |
| 11 B  | 1.835012 | 2.910386 | 3.167053 | 2.079524 | 1.898972 |
| 12 Se | 3.427732 | 3.328383 | 1.964325 | 3.399148 | 3.743070 |
|       | 6        | 7        | 8        | 9        | 10       |
| 6 B   | 0.000000 |          |          |          |          |
| 7 Co  | 2.374511 | 0.000000 |          |          |          |
| 8 B   | 1.820897 | 2.237512 | 0.000000 |          |          |
| 9 B   | 3.119596 | 2.151732 | 1.771235 | 0.000000 |          |
| 10 B  | 2.965718 | 3.360258 | 1.722351 | 1.768052 | 0.000000 |
| 11 B  | 3.759470 | 3.370775 | 2.876462 | 1.764512 | 1.741651 |
| 12 Se | 1.971854 | 2.397300 | 3.382661 | 3.926518 | 4.302032 |
|       | 11       | 12       |          |          |          |
| 12 Se | 4.336200 | 0.000000 |          |          |          |

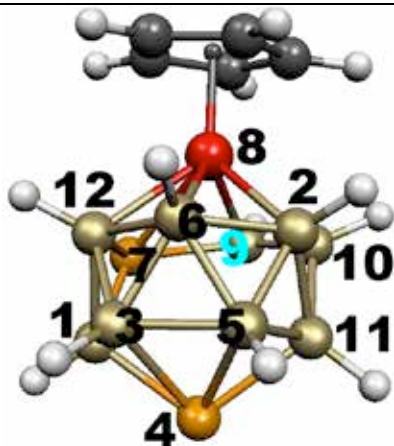

9. -6608.2351257 +23.3 C<sub>1</sub>

|      | 1        | 2        | 3        | 4        | 5        |  |
|------|----------|----------|----------|----------|----------|--|
| 1 B  | 0.000000 |          |          |          |          |  |
| 2 B  | 3.673280 | 0.000000 |          |          |          |  |
| 3 B  | 1.788935 | 2.938755 | 0.000000 |          |          |  |
| 4 Se | 2.038687 | 3.177131 | 2.162709 | 0.000000 |          |  |
| 5 B  | 3.064835 | 1.733576 | 1.844306 | 2.148246 | 0.000000 |  |
| 6 B  | 2.897243 | 1.782323 | 1.736611 | 3.179152 | 1.758818 |  |
| 7 Se | 2.051612 | 3.791536 | 3.339166 | 3.431906 | 4.110738 |  |
| 8 Co | 3.384867 | 2.156072 | 3.337137 | 4.035878 | 3.310098 |  |
| 9 B  | 3.305779 | 3.011420 | 4.086158 | 3.597977 | 3.940667 |  |
| 10 B | 3.764182 | 1.754906 | 3.856008 | 3.351851 | 3.006955 |  |
| 11 B | 3.333696 | 1.719561 | 3.064200 | 2.061329 | 1.815067 |  |
| 12 B | 1.783709 | 3.039094 | 1.717379 | 3.170761 | 2.920314 |  |
|      | 6        | 7        | 8        | 9        | 10       |  |
| 6 B  | 0.000000 |          |          |          |          |  |
| 7 Se | 3.449486 | 0.000000 |          |          |          |  |
| 8 Co | 2.144271 | 2.520254 | 0.000000 |          |          |  |
| 9 B  | 3.650462 | 1.973780 | 2.214016 | 0.000000 |          |  |
| 10 B | 3.083565 | 3.172541 | 2.184074 | 1.616800 | 0.000000 |  |
| 11 B | 2.870775 | 3.745556 | 3.221043 | 2.852358 | 1.759646 |  |
| 12 B | 1.737384 | 2.198384 | 2.221977 | 3.305335 | 3.552445 |  |
|      | 11       | 12       |          |          |          |  |
| 11 B | 0.000000 |          |          |          |          |  |
| 12 B | 3.591198 | 0.000000 |          |          |          |  |

Table S5C. Energy ranking for all of the CpCoSe<sub>2</sub>B<sub>9</sub>H<sub>9</sub> optimized structures after B3LYP/6-31G(d) optimizations:

| No | Initial structure           | Final energy (a.u.) | ΔE (kcal/mol) |
|----|-----------------------------|---------------------|---------------|
| 1  | 3-AnticubeOh-Co3Se1Se7      | -6604.0433368       | 0.00          |
| 2  | 2-CubeOh-Co1Se1Se2          | -6604.0433283       | 0.01          |
| 3  | 2-CubeOh-Co2Se1Se2          | -6604.0433283       | 0.01          |
| 4  | 3-AnticubeOh-Co3Se3Se3      | -6604.0433283       | 0.01          |
| 5  | 1-Icos-Co1Se1Se1            | -6604.0433280       | 0.01          |
| 6  | 3-AnticubeOh-Co3Se1Se5_i-31 | -6604.0433212       | 0.01          |
| 7  | 3-AnticubeOh-Co2Se2Se6      | -6604.0433119       | 0.02          |
| 8  | 3-AnticubeOh-Co3Se1Se5_r-31 | -6604.0433075       | 0.02          |
| 9  | 3-AnticubeOh-Co2Se1Se2      | -6604.0432749       | 0.04          |
| 10 | 3-AnticubeOh-Co3Se1Se2      | -6604.0432527       | 0.05          |
| 11 | 3-AnticubeOh-Co2Se1Se6      | -6604.0432338       | 0.06          |
| 12 | 3-AnticubeOh-Co1Se2Se4_i-24 | -6604.0382534       | 3.19          |
| 13 | 3-AnticubeOh-Co1Se1Se5      | -6604.0382524       | 3.19          |
| 14 | 2-CubeOh-Co2Se1Se1          | -6604.0382523       | 3.19          |
| 15 | 3-AnticubeOh-Co3Se2Se1      | -6604.0382523       | 3.19          |
| 16 | 3-AnticubeOh-Co1Se2Se4_r-24 | -6604.0382521       | 3.19          |
| 17 | 2-CubeOh-Co2Se3Se3          | -6604.0382514       | 3.19          |
| 18 | 3-AnticubeOh-Co3Se1Se1      | -6604.0382408       | 3.20          |
| 19 | 3-AnticubeOh-Co2Se2Se5      | -6604.0359992       | 4.60          |
| 20 | 3-AnticubeOh-Co3Se3Se4      | -6604.0359451       | 4.64          |
| 21 | 2-CubeOh-Co1Se2Se3          | -6604.0359412       | 4.64          |
| 22 | 3-AnticubeOh-Co3Se2Se3      | -6604.0358554       | 4.69          |
| 23 | 2-CubeOh-Co1Se1Se7          | -6604.0339762       | 5.87          |
| 24 | 2-CubeOh-Co1Se3Se2          | -6604.0339762       | 5.87          |
| 25 | 2-CubeOh-Co2Se3Se1          | -6604.0339757       | 5.87          |
| 26 | 1-Icos-Co1Se1Se3            | -6604.0339751       | 5.87          |
| 27 | 3-AnticubeOh-Co1Se2Se5      | -6604.0339690       | 5.88          |
| 28 | 2-CubeOh-Co2Se1Se3          | -6604.0339651       | 5.88          |
| 29 | 3-AnticubeOh-Co2Se3Se5      | -6604.0339639       | 5.88          |
| 30 | 3-AnticubeOh-Co3Se3Se1      | -6604.0339521       | 5.89          |
| 31 | 3-AnticubeOh-Co3Se1Se4      | -6604.0339418       | 5.90          |
| 32 | 3-AnticubeOh-Co3Se4Se2      | -6604.0264903       | 10.57         |
| 33 | 3-AnticubeOh-Co2Se1Se4      | -6604.0264036       | 10.63         |
| 34 | 2-CubeOh-Co2Se4Se2          | -6604.0193365       | 15.06         |
| 35 | 1-Icos-Co1Se2Se1            | -6604.0193345       | 15.06         |
| 36 | 2-CubeOh-Co2Se2Se2          | -6604.0193345       | 15.06         |
| 37 | 2-CubeOh-Co2Se2Se3          | -6604.0193345       | 15.06         |
| 38 | 3-AnticubeOh-Co1Se2Se9      | -6604.0193301       | 15.06         |
| 39 | 1-Icos-Co1Se1Se2            | -6604.0189145       | 15.33         |

|    |                             |               |       |
|----|-----------------------------|---------------|-------|
| 40 | 2-CubeOh-Co1Se1Se1          | -6604.0189145 | 15.33 |
| 41 | 2-CubeOh-Co1Se2Se1          | -6604.0189145 | 15.33 |
| 42 | 2-CubeOh-Co2Se1Se9          | -6604.0135849 | 18.67 |
| 43 | 2-CubeOh-Co2Se3Se5          | -6604.0135847 | 18.67 |
| 44 | 2-CubeOh-Co2Se3Se8          | -6604.0092697 | 21.38 |
| 45 | 2-CubeOh-Co2Se4Se6          | -6604.0092692 | 21.38 |
| 46 | 3-AnticubeOh-Co2Se1Se3      | -6604.0070290 | 22.78 |
| 47 | 2-CubeOh-Co1Se1Se6          | -6604.0056268 | 23.66 |
| 48 | 2-CubeOh-Co1Se3Se4          | -6604.0046571 | 24.27 |
| 49 | 2-CubeOh-Co2Se2Se5          | -6604.0046571 | 24.27 |
| 50 | 2-CubeOh-Co2Se4Se3          | -6604.0046570 | 24.27 |
| 51 | 3-AnticubeOh-Co3Se4Se7      | -6604.0046559 | 24.27 |
| 52 | 3-AnticubeOh-Co3Se4Se1      | -6604.0046553 | 24.27 |
| 53 | 1-Icos-Co1Se2Se3_i-42       | -6604.0046535 | 24.27 |
| 54 | 3-AnticubeOh-Co1Se3Se5      | -6604.0042062 | 24.56 |
| 55 | 3-AnticubeOh-Co3Se2Se2      | -6604.0042058 | 24.56 |
| 56 | 1-Icos-Co1Se2Se3_r-42       | -6604.0041275 | 24.60 |
| 57 | 2-CubeOh-Co2Se5Se2          | -6604.0041272 | 24.60 |
| 58 | 3-AnticubeOh-Co3Se4Se3      | -6604.0041260 | 24.61 |
| 59 | 3-AnticubeOh-Co3Se2Se5      | -6604.0037964 | 24.81 |
| 60 | 3-AnticubeOh-Co2Se2Se3      | -6604.0037791 | 24.82 |
| 61 | 3-AnticubeOh-Co2Se4Se1      | -6604.0037672 | 24.83 |
| 62 | 3-AnticubeOh-Co3Se4Se6      | -6604.0037401 | 24.85 |
| 63 | 3-AnticubeOh-Co3Se3Se8_i-42 | -6604.0037376 | 24.85 |
| 64 | 3-AnticubeOh-Co3Se3Se8_r-42 | -6604.0037323 | 24.85 |
| 65 | 3-AnticubeOh-Co3Se3Se7_i-25 | -6604.0033504 | 25.09 |
| 66 | 3-AnticubeOh-Co3Se3Se7_r-25 | -6604.0033382 | 25.10 |
| 67 | 2-CubeOh-Co2Se2Se6          | -6604.0025851 | 25.57 |
| 68 | 2-CubeOh-Co2Se1Se8          | -6604.0025834 | 25.57 |
| 69 | 3-AnticubeOh-Co2Se3Se1      | -6604.0003051 | 27.00 |
| 70 | 3-AnticubeOh-Co2Se2Se2      | -6604.0002892 | 27.01 |
| 71 | 2-CubeOh-Co1Se1Se4          | -6604.0002786 | 27.02 |
| 72 | 2-CubeOh-Co2Se3Se6          | -6604.0002784 | 27.02 |
| 73 | 2-CubeOh-Co2Se2Se8          | -6604.0002783 | 27.02 |
| 74 | 3-AnticubeOh-Co2Se1Se5      | -6604.0002751 | 27.02 |
| 75 | 3-AnticubeOh-Co2Se2Se1      | -6603.9995351 | 27.49 |
| 76 | 2-CubeOh-Co2Se1Se5          | -6603.9994048 | 27.57 |
| 77 | 3-AnticubeOh-Co1Se2Se1      | -6603.9994047 | 27.57 |
| 78 | 1-Icos-Co1Se1Se6            | -6603.9969952 | 29.08 |
| 79 | 3-AnticubeOh-Co3Se3Se2      | -6603.9964518 | 29.42 |
| 80 | 3-AnticubeOh-Co3Se1Se6      | -6603.9964453 | 29.43 |
| 81 | 3-AnticubeOh-Co1Se4Se2      | -6603.9924753 | 31.92 |
| 82 | 3-AnticubeOh-Co3Se1Se3      | -6603.9901723 | 33.36 |

|     |                             |               |       |
|-----|-----------------------------|---------------|-------|
| 83  | 3-AnticubeOh-Co1Se1Se7      | -6603.9901656 | 33.37 |
| 84  | 2-CubeOh-Co2Se1Se4          | -6603.9901644 | 33.37 |
| 85  | 3-AnticubeOh-Co3Se1Se9      | -6603.9895433 | 33.76 |
| 86  | 3-AnticubeOh-Co3Se3Se5      | -6603.9895207 | 33.77 |
| 87  | 3-AnticubeOh-Co1Se2Se8      | -6603.9876946 | 34.92 |
| 88  | 1-Icos-Co1Se1Se4            | -6603.9875126 | 35.03 |
| 89  | 2-CubeOh-Co2Se4Se1          | -6603.9875122 | 35.03 |
| 90  | 2-CubeOh-Co2Se3Se2          | -6603.9871268 | 35.27 |
| 91  | 3-AnticubeOh-Co2Se3Se4      | -6603.9870719 | 35.31 |
| 92  | 2-CubeOh-Co2Se3Se7          | -6603.9859111 | 36.04 |
| 93  | 2-CubeOh-Co2Se2Se1          | -6603.9857324 | 36.15 |
| 94  | 3-AnticubeOh-Co1Se2Se6      | -6603.9856050 | 36.23 |
| 95  | 3-AnticubeOh-Co1Se1Se6_r-36 | -6603.9856021 | 36.23 |
| 96  | 2-CubeOh-Co2Se1Se7          | -6603.9856013 | 36.23 |
| 97  | 3-AnticubeOh-Co1Se1Se6_i-36 | -6603.9855947 | 36.23 |
| 98  | 2-CubeOh-Co1Se1Se3          | -6603.9838627 | 37.32 |
| 99  | 3-AnticubeOh-Co3Se6Se1      | -6603.9826082 | 38.11 |
| 100 | 2-CubeOh-Co2Se4Se5          | -6603.9824565 | 38.20 |
| 101 | 2-CubeOh-Co1Se2Se5          | -6603.9824553 | 38.20 |
| 102 | 3-AnticubeOh-Co3Se4Se5      | -6603.9824553 | 38.20 |
| 103 | 3-AnticubeOh-Co3Se2Se9      | -6603.9824420 | 38.21 |
| 104 | 3-AnticubeOh-Co2Se2Se4      | -6603.9804009 | 39.49 |
| 105 | 2-CubeOh-Co2Se2Se9          | -6603.9796806 | 39.95 |
| 106 | 3-AnticubeOh-Co3Se2Se6      | -6603.9793102 | 40.18 |
| 107 | 3-AnticubeOh-Co3Se1Se8      | -6603.9781870 | 40.88 |
| 108 | 2-CubeOh-Co1Se3Se1          | -6603.9769013 | 41.69 |
| 109 | 3-AnticubeOh-Co1Se3Se2      | -6603.9768903 | 41.70 |
| 110 | 2-CubeOh-Co2Se4Se7          | -6603.9756118 | 42.50 |
| 111 | 3-AnticubeOh-Co1Se2Se7      | -6603.9748807 | 42.96 |
| 112 | 3-AnticubeOh-Co1Se3Se1      | -6603.9748804 | 42.96 |
| 113 | 1-Icos-Co1Se2Se2            | -6603.9748802 | 42.96 |
| 114 | 2-CubeOh-Co2Se2Se4          | -6603.9748790 | 42.96 |
| 115 | 3-AnticubeOh-Co2Se2Se8      | -6603.9748207 | 43.00 |
| 116 | 2-CubeOh-Co2Se4Se4          | -6603.9737714 | 43.65 |
| 117 | 2-CubeOh-Co2Se1Se10         | -6603.9737702 | 43.65 |
| 118 | 2-CubeOh-Co2Se3Se4          | -6603.9723633 | 44.54 |
| 119 | 2-CubeOh-Co2Se2Se7          | -6603.9722612 | 44.60 |
| 120 | 2-CubeOh-Co1Se1Se5          | -6603.9700658 | 45.98 |
| 121 | 1-Icos-Co1Se1Se5            | -6603.9700649 | 45.98 |
| 122 | 2-CubeOh-Co1Se2Se4          | -6603.9700649 | 45.98 |
| 123 | 3-AnticubeOh-Co1Se2Se2      | -6603.9667637 | 48.05 |
| 124 | 3-AnticubeOh-Co2Se2Se7      | -6603.9608607 | 51.76 |
| 125 | 3-AnticubeOh-Co3Se2Se4      | -6603.9607882 | 51.80 |

|     |                             |               |       |
|-----|-----------------------------|---------------|-------|
| 126 | 2-CubeOh-Co2Se5Se1          | -6603.9597828 | 52.43 |
| 127 | 3-AnticubeOh-Co1Se1Se1      | -6603.9541910 | 55.94 |
| 128 | 3-AnticubeOh-Co1Se1Se3      | -6603.9519635 | 57.34 |
| 129 | 3-AnticubeOh-Co3Se2Se7      | -6603.9515720 | 57.58 |
| 130 | 2-CubeOh-Co2Se6Se1          | -6603.9510483 | 57.91 |
| 131 | 3-AnticubeOh-Co2Se3Se3      | -6603.9495772 | 58.84 |
| 132 | 3-AnticubeOh-Co2Se4Se2      | -6603.9494566 | 58.91 |
| 133 | 3-AnticubeOh-Co2Se3Se2_i-24 | -6603.9492072 | 59.07 |
| 134 | 3-AnticubeOh-Co2Se3Se2_r-24 | -6603.9491919 | 59.08 |
| 135 | 3-AnticubeOh-Co2Se1Se1_r-10 | -6603.9491652 | 59.09 |
| 136 | 3-AnticubeOh-Co2Se1Se1_i-10 | -6603.9491469 | 59.11 |
| 137 | 3-AnticubeOh-Co3Se3Se6      | -6603.9473997 | 60.20 |
| 138 | 3-AnticubeOh-Co1Se2Se3      | -6603.9473996 | 60.20 |
| 139 | 3-AnticubeOh-Co3Se2Se8      | -6603.9473462 | 60.24 |
| 140 | 2-CubeOh-Co1Se3Se3          | -6603.9303708 | 70.89 |
| 141 | 3-AnticubeOh-Co3Se4Se4      | -6603.9291181 | 71.67 |
| 142 | 3-AnticubeOh-Co3Se1Se10     | -6603.9290682 | 71.71 |
| 143 | 3-AnticubeOh-Co3Se5Se2      | -6603.9288770 | 71.83 |
| 144 | 3-AnticubeOh-Co1Se3Se4      | -6603.9265698 | 73.27 |
| 145 | 3-AnticubeOh-Co1Se4Se1      | -6603.9264851 | 73.33 |
| 146 | 3-AnticubeOh-Co2Se4Se4      | -6603.9264452 | 73.35 |
| 147 | 3-AnticubeOh-Co1Se1Se4      | -6603.9252284 | 74.12 |
| 148 | 3-AnticubeOh-Co3Se5Se1      | -6603.9241087 | 74.82 |
| 149 | 3-AnticubeOh-Co2Se2Se9      | -6603.9191689 | 77.92 |
| 150 | 2-CubeOh-Co2Se1Se6          | -6603.9125747 | 82.06 |
| 151 | 3-AnticubeOh-Co2Se4Se3_r-11 | -6603.9062104 | 86.05 |
| 152 | 3-AnticubeOh-Co2Se4Se3_i-11 | -6603.9062076 | 86.05 |
| 153 | 3-AnticubeOh-Co1Se1Se2      | -6603.9047812 | 86.95 |
| 154 | 3-AnticubeOh-Co1Se3Se3      | -6603.9047645 | 86.96 |
| 155 | 2-CubeOh-Co1Se2Se2          | -6603.9007182 | 89.50 |



Table S6. Orbital energies and HOMO/LUMO gaps:

| Structure  | HOMO energy (Hartree) | LUMO energy (Hartree) | HOMO/LUMO Gap (eV) |
|------------|-----------------------|-----------------------|--------------------|
| CoSe2B5-1  | -0.207703             | -0.123366             | 2.294928           |
| CoSe2B5-2  | -0.202609             | -0.115067             | 2.382140           |
| CoSe2B5-3  | -0.190934             | -0.118471             | 1.971820           |
| CoSe2B5-4  | -0.197226             | -0.141080             | 1.527811           |
| CoSe2B5-5  | -0.198927             | -0.135388             | 1.728985           |
| CoSe2B5-6  | -0.213043             | -0.106927             | 2.887565           |
| CoSe2B5-7  | -0.190944             | -0.115449             | 2.054325           |
| CoSe2B5-8  | -0.182151             | -0.098794             | 2.268261           |
| CoSe2B5-9  | -0.202180             | -0.108189             | 2.557627           |
| CoSe2B5-10 | -0.183508             | -0.109032             | 2.026596           |
| CoSe2B6-1  | -0.199706             | -0.114847             | 2.309132           |
| CoSe2B6-2  | -0.194602             | -0.109244             | 2.322711           |
| CoSe2B6-3  | -0.202580             | -0.118173             | 2.296833           |
| CoSe2B6-4  | -0.200471             | -0.132398             | 1.852362           |
| CoSe2B6-5  | -0.190255             | -0.075874             | 3.112467           |
| CoSe2B6-6  | -0.202695             | -0.129903             | 1.980772           |
| CoSe2B6-7  | -0.180960             | -0.107646             | 1.994977           |
| CoSe2B6-8  | -0.194234             | -0.124046             | 1.909914           |
| CoSe2B6-9  | -0.192161             | -0.123966             | 1.855681           |
| CoSe2B6-10 | -0.191537             | -0.118976             | 1.974486           |
| CoSe2B6-11 | -0.185259             | -0.120009             | 1.775544           |
| CoSe2B6-12 | -0.190777             | -0.112938             | 2.118108           |
| CoSe2B6-13 | -0.186662             | -0.108521             | 2.126326           |
| CoSe2B7-1  | -0.215829             | -0.125439             | 2.459638           |
| CoSe2B7-2  | -0.209763             | -0.151553             | 1.583976           |
| CoSe2B7-3  | -0.186634             | -0.122791             | 1.737257           |
| CoSe2B7-4  | -0.199457             | -0.124463             | 2.040692           |
| CoSe2B7-5  | -0.207802             | -0.142188             | 1.785449           |
| CoSe2B7-6  | -0.201751             | -0.123288             | 2.135088           |
| CoSe2B7-7  | -0.194659             | -0.116894             | 2.116095           |
| CoSe2B7-8  | -0.192861             | -0.121290             | 1.947547           |
| CoSe2B7-9  | -0.186950             | -0.119201             | 1.843545           |
| CoSe2B7-10 | -0.179862             | -0.143056             | 1.001543           |
| CoSe2B8-1  | -0.211559             | -0.130002             | 2.219280           |
| CoSe2B8-2  | -0.197889             | -0.109928             | 2.393542           |
| CoSe2B8-3  | -0.200179             | -0.120124             | 2.178409           |
| CoSe2B8-4  | -0.202527             | -0.125717             | 2.090108           |
| CoSe2B8-5  | -0.209418             | -0.102703             | 2.903865           |

|           |           |           |          |
|-----------|-----------|-----------|----------|
| CoSe2B8-6 | -0.193355 | -0.113083 | 2.184314 |
| CoSe2B8-7 | -0.214349 | -0.123077 | 2.483639 |
| CoSe2B8-8 | -0.210269 | -0.118291 | 2.502850 |
| CoSe2B9-1 | -0.203283 | -0.123955 | 2.158626 |
| CoSe2B9-2 | -0.186029 | -0.144097 | 1.141028 |
| CoSe2B9-3 | -0.198906 | -0.122144 | 2.088801 |
| CoSe2B9-4 | -0.202275 | -0.110322 | 2.502170 |
| CoSe2B9-5 | -0.206947 | -0.136695 | 1.911655 |
| CoSe2B9-6 | -0.200818 | -0.132675 | 1.854266 |
| CoSe2B9-7 | -0.167636 | -0.123400 | 1.203723 |
| CoSe2B9-8 | -0.200326 | -0.144544 | 1.517906 |
| CoSe2B9-9 | -0.202835 | -0.135969 | 1.819517 |

Cartesian coordinates of all optimized structures (M06-L/6-311G(d,p)).

CoSe2B5-1

|    |             |             |             |
|----|-------------|-------------|-------------|
| B  | 1.71149700  | -0.75865200 | 1.40605600  |
| H  | 2.41590800  | -1.20347100 | 2.24610900  |
| B  | 0.23361600  | 0.64529700  | 1.62830100  |
| B  | 0.72509300  | -1.45847000 | -0.00889200 |
| H  | 0.63360300  | -2.54247700 | -0.47769200 |
| Se | 2.55720400  | -0.54591300 | -0.37212000 |
| B  | 0.08947300  | -1.03916300 | 1.52476400  |
| H  | -0.36215100 | -1.66608000 | 2.42114000  |
| H  | -0.11808100 | 1.20302600  | 2.61442500  |
| B  | 0.75139200  | 0.11622100  | -1.06587400 |
| H  | 0.64943300  | 0.14324100  | -2.24574400 |
| Se | 0.25329100  | 1.76213900  | 0.00502700  |
| Co | -0.99549100 | -0.20337100 | 0.05683500  |
| H  | -2.43470300 | 0.86386900  | -2.11205700 |
| C  | -2.51936100 | 0.18605100  | -1.27442500 |
| C  | -2.90771800 | 0.53987300  | 0.05581200  |
| H  | -1.79717300 | -1.74797400 | -2.11623500 |
| H  | -3.16456500 | 1.53405600  | 0.39443500  |
| C  | -2.83169500 | -0.61796900 | 0.86553800  |
| H  | -3.01464500 | -0.66622300 | 1.92929800  |
| C  | -2.36628700 | -1.68816000 | 0.04763900  |
| H  | -2.15382200 | -2.69509200 | 0.37789700  |
| C  | -2.18956000 | -1.18807700 | -1.27901900 |

CoSe2B5-2

|    |             |             |             |
|----|-------------|-------------|-------------|
| Se | 0.73180100  | 1.69953500  | -0.60790300 |
| B  | 2.32806000  | -1.06586900 | 0.33006600  |
| Co | -0.71816300 | 0.00001700  | 0.10211500  |
| B  | 2.32809000  | 1.06578900  | 0.33005800  |
| Se | 0.73175100  | -1.69953600 | -0.60791600 |
| H  | 3.25518500  | 1.79508900  | 0.24598400  |
| H  | 3.25512800  | -1.79520200 | 0.24599200  |
| B  | 0.74494200  | 0.92931000  | 1.33285900  |
| H  | 0.31511600  | 1.64170000  | 2.17521000  |
| B  | 2.17378300  | -0.00003700 | 1.58825100  |
| H  | 2.91930600  | -0.00004600 | 2.50368300  |
| B  | 0.74492000  | -0.92935200 | 1.33285800  |
| H  | 0.31502300  | -1.64168500 | 2.17522000  |
| H  | -2.23534900 | 2.17475300  | 0.89326700  |
| C  | -2.31495200 | 1.14761800  | 0.56562800  |
| C  | -2.26875400 | 0.00040500  | 1.40261500  |
| H  | -2.45450700 | 1.34193800  | -1.66342300 |
| H  | -2.13543600 | 0.00076900  | 2.47493800  |
| C  | -2.31491000 | -1.14735400 | 0.56637700  |
| H  | -2.23525200 | -2.17427800 | 0.89466300  |
| C  | -2.42685300 | -0.70587500 | -0.78980300 |

|   |             |             |             |
|---|-------------|-------------|-------------|
| H | -2.45443900 | -1.34309800 | -1.66255200 |
| C | -2.42688800 | 0.70527900  | -0.79026600 |

CoSe2B5-3

|    |             |             |             |
|----|-------------|-------------|-------------|
| B  | -2.20136800 | 0.14160800  | -0.38919200 |
| B  | -0.58398600 | 0.21316800  | 1.81586200  |
| B  | -1.93871900 | -0.70503300 | 1.23114900  |
| Co | 0.76148800  | -0.04061000 | 0.09945700  |
| Se | -0.83340600 | 1.65018600  | -0.40533300 |
| B  | -1.95275600 | 1.00679400  | 1.13988800  |
| Se | -0.96799000 | -1.53493500 | -0.59533600 |
| B  | -0.26657100 | -1.33596000 | 1.29758100  |
| H  | 0.21657700  | -2.27745900 | 1.81853200  |
| H  | -2.82667400 | 1.66225100  | 1.58576200  |
| H  | -3.17549800 | 0.16238300  | -1.05002500 |
| H  | -0.13941600 | 0.48038200  | 2.88182200  |
| H  | -2.82261000 | -1.31488200 | 1.72369300  |
| H  | 2.49605500  | -2.22630100 | 0.12693500  |
| C  | 2.46542300  | -1.14816000 | 0.05271500  |
| C  | 2.48996800  | -0.23859300 | 1.14504100  |
| H  | 2.34891300  | -0.79654500 | -2.16013600 |
| H  | 2.50307200  | -0.50466100 | 2.19209300  |
| C  | 2.36192900  | 1.07371100  | 0.61812400  |
| H  | 2.30212100  | 1.98758000  | 1.19222100  |
| C  | 2.33250000  | 0.97048600  | -0.81422900 |
| H  | 2.22964000  | 1.79719100  | -1.50396900 |
| C  | 2.39553700  | -0.38993000 | -1.15930800 |

CoSe2B5-4

|    |             |             |             |
|----|-------------|-------------|-------------|
| B  | -1.69424900 | -0.62031900 | 1.40277000  |
| B  | -0.73177900 | -1.55984400 | 0.09039500  |
| Co | 1.03277000  | -0.20068200 | 0.11413800  |
| B  | -0.39248500 | 0.67252300  | 1.54956600  |
| B  | -1.90519700 | 0.95972400  | 0.48547900  |
| B  | -0.02375500 | -1.02571000 | 1.52865000  |
| Se | -0.18355200 | 1.74346900  | -0.17457700 |
| Se | -2.41533000 | -0.71853800 | -0.54097200 |
| H  | -2.77124300 | 1.70920900  | 0.76937000  |
| H  | -0.21946300 | 1.28204100  | 2.54981500  |
| H  | -0.67631900 | -2.72259500 | -0.14321200 |
| H  | -2.45893900 | -0.93624200 | 2.24432500  |
| H  | 0.45863700  | -1.69913400 | 2.37286300  |
| H  | 3.23329300  | 1.56520700  | 0.24343800  |
| C  | 2.93904700  | 0.56271000  | -0.03408900 |
| C  | 2.48102400  | 0.15184500  | -1.31760200 |
| H  | 3.14711400  | -0.57873600 | 1.87832800  |
| H  | 2.34751800  | 0.79309600  | -2.17795500 |
| C  | 2.13625000  | -1.22011100 | -1.25116300 |
| H  | 1.71308400  | -1.81356600 | -2.04922600 |

|   |            |             |            |
|---|------------|-------------|------------|
| C | 2.40756400 | -1.67281500 | 0.08040400 |
| H | 2.22186300 | -2.66662000 | 0.46172700 |
| C | 2.90595000 | -0.57058500 | 0.82464700 |

CoSe2B5-5

|    |             |             |             |
|----|-------------|-------------|-------------|
| B  | 1.97395000  | -0.85576400 | 1.04340400  |
| H  | 2.86686200  | -1.52043800 | 1.45154800  |
| B  | 0.68223000  | 0.00003900  | 1.89071900  |
| Se | 0.95902100  | -1.61709900 | -0.62750600 |
| B  | 1.97412000  | 0.85551700  | 1.04334500  |
| B  | 0.35464100  | -1.56192700 | 1.22657700  |
| H  | -0.21115500 | -2.41403900 | 1.81428200  |
| H  | 2.86718600  | 1.52003400  | 1.45140400  |
| H  | 0.44039700  | 0.00006100  | 3.05737900  |
| Se | 0.95927500  | 1.61697600  | -0.62753700 |
| B  | 0.35493500  | 1.56204300  | 1.22655000  |
| H  | -0.21030500 | 2.41447800  | 1.81429600  |
| Co | -0.65154300 | 0.00006600  | 0.14185700  |
| H  | -2.06554000 | 1.34518900  | -1.92109800 |
| C  | -2.19647100 | 0.70735000  | -1.05792400 |
| C  | -2.32942900 | 1.15023200  | 0.29173600  |
| H  | -2.06478700 | -1.33840500 | -1.92590000 |
| H  | -2.33243700 | 2.17703700  | 0.62536000  |
| C  | -2.41765900 | -0.00211300 | 1.12264900  |
| H  | -2.47926200 | -0.00411900 | 2.20166300  |
| C  | -2.32873800 | -1.15137500 | 0.28762300  |
| H  | -2.33092300 | -2.17932700 | 0.61771700  |
| C  | -2.19600300 | -0.70369700 | -1.06046800 |

CoSe2B5-6

|    |             |             |             |
|----|-------------|-------------|-------------|
| Se | 1.80606800  | 1.66098600  | -0.14717700 |
| B  | 0.00571600  | 1.20573500  | -0.81822900 |
| H  | -0.38838600 | 2.00754100  | -1.59973600 |
| B  | 1.80284600  | 0.00032700  | 1.04781600  |
| H  | 2.54172800  | 0.00063800  | 1.96626600  |
| B  | 0.21921000  | -0.87733800 | 1.03143400  |
| H  | -0.04106200 | -1.55348700 | 1.96764500  |
| Se | 1.80725000  | -1.66026700 | -0.14722800 |
| B  | 0.21855100  | 0.87681600  | 1.03127500  |
| H  | -0.04241300 | 1.55277600  | 1.96743300  |
| Co | -1.24946400 | -0.00076400 | -0.02990600 |
| B  | 0.00611600  | -1.20714500 | -0.81757200 |
| H  | -0.38821400 | -2.01050800 | -1.59738800 |
| H  | -2.77847300 | -0.00566200 | 2.30819100  |
| C  | -2.86934300 | -0.00278900 | 1.23144200  |
| C  | -2.90794300 | -1.14963300 | 0.39080500  |
| H  | -2.84716200 | 2.17449800  | 0.73065000  |
| H  | -2.85048000 | -2.17761700 | 0.71986000  |
| C  | -2.96453900 | -0.70614900 | -0.95785000 |

|   |             |             |             |
|---|-------------|-------------|-------------|
| H | -2.95802800 | -1.33958900 | -1.83297400 |
| C | -2.96350400 | 0.71140800  | -0.95430100 |
| H | -2.95600800 | 1.34912900  | -1.82630700 |
| C | -2.90650100 | 1.14824200  | 0.39656400  |

CoSe2B5-7

|    |             |             |             |
|----|-------------|-------------|-------------|
| B  | -0.21584000 | 0.57213700  | -1.54339500 |
| Se | -0.04849000 | 1.88527000  | -0.09025000 |
| Co | 0.97898100  | -0.23727400 | 0.00921400  |
| B  | -0.75292900 | -1.03329600 | 0.80581400  |
| B  | -0.28264300 | 0.54260300  | 1.43115900  |
| B  | -0.72706600 | -0.91734800 | -1.02704500 |
| Se | -2.61952100 | -0.71880500 | -0.16834500 |
| B  | -1.95868900 | 0.22265900  | 1.35475900  |
| H  | 0.13448400  | 0.96812600  | -2.60628600 |
| H  | 0.17281400  | 0.85430300  | 2.47955200  |
| H  | -0.66340100 | -1.92634500 | -1.65396000 |
| H  | -0.68688000 | -2.04644300 | 1.41657800  |
| H  | -2.66907200 | 0.57970000  | 2.22578500  |
| H  | 1.60409000  | -2.91276900 | -0.11341900 |
| C  | 2.06011100  | -1.93571700 | -0.03842800 |
| C  | 2.33071600  | -1.23006200 | 1.17204600  |
| H  | 2.31243200  | -1.34015500 | -2.18174800 |
| H  | 2.11274300  | -1.58207800 | 2.17029100  |
| C  | 2.83857000  | 0.04527000  | 0.82529700  |
| H  | 3.07789900  | 0.84372100  | 1.51377000  |
| C  | 2.90056200  | 0.12191400  | -0.59855800 |
| H  | 3.18868200  | 0.99286400  | -1.17061300 |
| C  | 2.43369600  | -1.10442400 | -1.13418500 |

CoSe2B5-8

|    |             |             |             |
|----|-------------|-------------|-------------|
| Se | 0.31558000  | 1.67816500  | -0.12470700 |
| Se | 2.44241500  | -0.74779000 | -0.40825900 |
| Co | -1.09065400 | -0.18181000 | 0.03121600  |
| B  | 1.90395700  | 0.84325900  | 0.91644000  |
| B  | 0.51231900  | -0.15575600 | -1.09905800 |
| H  | 0.48750600  | -0.22944600 | -2.28039600 |
| H  | 2.72189600  | 1.61331400  | 1.27423400  |
| B  | 0.25681000  | 0.03765400  | 1.50463200  |
| H  | -0.14990500 | 0.29148100  | 2.58795700  |
| B  | 1.74539500  | -0.74326700 | 1.50411900  |
| H  | 2.37674100  | -1.23762700 | 2.36396100  |
| B  | 0.47038600  | -1.35966300 | 0.44825100  |
| H  | 0.30743700  | -2.53058600 | 0.38132600  |
| H  | -3.05304700 | 0.30827900  | 2.02015800  |
| C  | -2.90790400 | -0.08539000 | 1.02457600  |
| C  | -2.55581000 | -1.41612000 | 0.68837900  |
| H  | -3.14775300 | 1.72247000  | -0.25713600 |
| H  | -2.39393900 | -2.22996500 | 1.38091500  |

|   |             |             |             |
|---|-------------|-------------|-------------|
| C | -2.41201600 | -1.49053600 | -0.73738800 |
| H | -2.12130400 | -2.37003900 | -1.29448100 |
| C | -2.68692400 | -0.20707800 | -1.28003600 |
| H | -2.65086300 | 0.06956500  | -2.32363400 |
| C | -2.96156100 | 0.65871500  | -0.18667200 |

CoSe2B5-9

|    |             |             |             |
|----|-------------|-------------|-------------|
| B  | 1.60595000  | 1.75455300  | 0.57682600  |
| H  | 2.22249200  | 2.75319000  | 0.70843100  |
| B  | 0.55444900  | -1.18596200 | -0.82683900 |
| H  | 0.39926500  | -2.00027700 | -1.67444900 |
| B  | 0.30256000  | 0.68424800  | 1.36083400  |
| H  | -0.15881200 | 1.07130000  | 2.38109200  |
| Co | -0.92519000 | -0.29118000 | 0.03110800  |
| B  | 1.99369000  | 0.27573600  | 1.29010800  |
| H  | 2.74545100  | 0.17295000  | 2.19538700  |
| B  | 0.73735900  | -0.97859100 | 0.99622900  |
| H  | 0.69476800  | -1.91201200 | 1.72373500  |
| Se | 2.42363200  | -0.92300300 | -0.31344800 |
| Se | -0.04611300 | 1.85451400  | -0.40343400 |
| H  | -1.75438800 | -2.92065900 | -0.00129400 |
| C  | -2.12541000 | -1.90548800 | 0.01141700  |
| C  | -2.41866500 | -1.10623100 | -1.13051700 |
| H  | -2.21451700 | -1.44499400 | 2.20279700  |
| H  | -2.31381500 | -1.40420300 | -2.16341000 |
| C  | -2.82055900 | 0.16712100  | -0.65836200 |
| H  | -3.05698000 | 1.02319100  | -1.27610300 |
| C  | -2.81373200 | 0.15484500  | 0.76753000  |
| H  | -3.03331400 | 0.99542600  | 1.41026800  |
| C  | -2.38091600 | -1.12580200 | 1.18357300  |

CoSe2B6-1

|    |             |             |             |
|----|-------------|-------------|-------------|
| Se | -0.75446000 | 1.57285200  | -0.58885800 |
| Co | 0.85794400  | -0.00005900 | 0.09081000  |
| B  | -0.51422900 | 0.91524300  | 1.42273200  |
| H  | 0.00239000  | 1.75032100  | 2.08416700  |
| B  | -2.31638500 | -0.87916300 | 0.70907300  |
| H  | -3.19529700 | -1.66630400 | 0.68571900  |
| Se | -0.75473700 | -1.57270000 | -0.58893000 |
| B  | -1.79264800 | -0.00002600 | 2.04008000  |
| H  | -2.18721800 | -0.00008000 | 3.14937700  |
| B  | -2.31672000 | 0.87916700  | 0.70921700  |
| H  | -3.19603000 | 1.66588500  | 0.68609900  |
| B  | -2.05869900 | 0.00015000  | -0.84798400 |
| H  | -2.80072100 | 0.00021700  | -1.76061300 |
| B  | -0.51429600 | -0.91524700 | 1.42270800  |
| H  | 0.00231100  | -1.75056500 | 2.08385900  |
| H  | 2.40127400  | -0.00225300 | 2.39215700  |
| C  | 2.47148100  | -0.00121600 | 1.31396200  |

|   |            |             |             |
|---|------------|-------------|-------------|
| C | 2.47052300 | 1.14591400  | 0.47541800  |
| H | 2.41495700 | -2.17501100 | 0.80288800  |
| H | 2.41516200 | 2.17352700  | 0.80690100  |
| C | 2.52741000 | 0.70464100  | -0.88838900 |
| H | 2.52650700 | 1.34323700  | -1.76074100 |
| C | 2.52737300 | -0.70306700 | -0.88973400 |
| H | 2.52652800 | -1.34004200 | -1.76326000 |
| C | 2.47041600 | -1.14679500 | 0.47327900  |

#### CoSe2B6-2

|    |             |             |             |
|----|-------------|-------------|-------------|
| H  | 0.11029100  | -0.18351900 | 2.95330400  |
| B  | -0.19381500 | 0.03388700  | 1.82579800  |
| B  | -1.88923800 | -0.23844800 | 1.37690800  |
| H  | -2.72406500 | -0.43808500 | 2.18579900  |
| Se | -0.34399000 | 1.64560000  | -0.63534700 |
| B  | -2.16309400 | 0.77530200  | -0.12593200 |
| H  | -3.12744700 | 1.37057700  | -0.44945800 |
| Se | -2.13332600 | -1.20465900 | -0.41816200 |
| B  | -1.24848900 | 1.39986000  | 1.30356800  |
| H  | -1.75218800 | 2.33406800  | 1.81886400  |
| B  | 0.53837000  | 1.45654300  | 1.21638900  |
| H  | 1.15254900  | 2.34170000  | 1.69607300  |
| B  | -0.47634900 | -1.29176900 | 0.74296300  |
| H  | -0.29559500 | -2.39872600 | 1.12978300  |
| Co | 1.08522000  | -0.10511600 | 0.17347600  |
| H  | 3.53807100  | 0.44383300  | 1.41155500  |
| C  | 3.08797700  | -0.11789000 | 0.60576100  |
| C  | 2.87990800  | 0.33475900  | -0.71761200 |
| H  | 2.45353400  | -2.01442500 | 1.61079100  |
| H  | 3.15447200  | 1.30367500  | -1.11209200 |
| C  | 2.21109800  | -0.70700600 | -1.44483900 |
| H  | 1.89153600  | -0.65074900 | -2.47666300 |
| C  | 2.00465900  | -1.79473200 | -0.57430100 |
| H  | 1.51587100  | -2.72748700 | -0.81413200 |
| C  | 2.51199800  | -1.41706500 | 0.71151600  |

#### CoSe2B6-3

|    |             |             |             |
|----|-------------|-------------|-------------|
| B  | -0.60209000 | -1.38649800 | -0.51798600 |
| B  | -0.28446400 | 0.53909800  | 1.56801800  |
| B  | -0.58190600 | 0.36785700  | -1.16008300 |
| Se | -2.48233600 | -0.30044700 | -0.47532900 |
| B  | -1.83558400 | -0.32410000 | 1.53624400  |
| B  | -1.82445700 | -1.81871200 | 0.70661300  |
| B  | -0.34867300 | -1.20971500 | 1.24638500  |
| Co | 1.02770000  | -0.21646700 | -0.00108900 |
| Se | -0.04312900 | 1.84114000  | 0.07468000  |
| H  | 0.22994200  | 0.88066000  | 2.58308300  |
| H  | -0.45879700 | -2.17160500 | -1.39411700 |
| H  | -2.37864500 | -2.85393000 | 0.76406800  |



|   |             |             |             |
|---|-------------|-------------|-------------|
| H | -2.60973000 | -0.05019600 | 2.38702500  |
| H | -0.53868400 | 0.54067000  | -2.33145400 |
| H | 0.18281700  | -1.92077700 | 2.03567300  |
| H | 2.69758500  | -1.18567700 | 2.01317900  |
| C | 2.69056300  | -0.92759500 | 0.96431600  |
| C | 2.94819400  | 0.34922000  | 0.41713700  |
| H | 1.98634500  | -2.81616500 | -0.00900300 |
| H | 3.19783100  | 1.23913400  | 0.97747600  |
| C | 2.75047500  | 0.27886700  | -1.00112900 |
| H | 2.83129100  | 1.10559500  | -1.69266700 |
| C | 2.36127300  | -1.03949100 | -1.32172400 |
| H | 2.07729400  | -1.40208700 | -2.29952600 |
| C | 2.29725000  | -1.78504400 | -0.10497200 |

#### CoSe2B6-4

|    |             |             |             |
|----|-------------|-------------|-------------|
| Co | -1.06367500 | -0.16776200 | 0.09226200  |
| Se | 0.33005400  | 1.64946000  | -0.60204000 |
| Se | 2.46332100  | -0.91091700 | -0.31338000 |
| B  | 0.66277600  | -1.24533600 | 0.64910200  |
| B  | -0.56782900 | 1.42795700  | 1.26566500  |
| B  | 0.18390200  | -0.01632100 | 1.79715300  |
| B  | 1.90519300  | -0.11043500 | 1.45103300  |
| B  | 1.14060600  | 1.42784900  | 1.37816200  |
| B  | 0.68420400  | -0.35539800 | -1.02446100 |
| H  | 2.59738400  | -0.46281000 | 2.34601400  |
| H  | -1.40337300 | 2.17179200  | 1.63989100  |
| H  | 0.44239300  | -0.70993000 | -2.12917100 |
| H  | -0.17947200 | -0.31806500 | 2.88946200  |
| H  | 1.58449100  | 2.40133800  | 1.88590000  |
| H  | 0.45495900  | -2.39382700 | 0.84520400  |
| H  | -2.10476800 | -2.35927800 | 1.39266600  |
| C  | -2.35265300 | -1.62031000 | 0.64374800  |
| C  | -2.09903800 | -1.73103000 | -0.75518200 |
| H  | -3.20190100 | 0.05575100  | 1.85948700  |
| H  | -1.61454100 | -2.56329500 | -1.24483000 |
| C  | -2.48254000 | -0.51390100 | -1.36081400 |
| H  | -2.34944200 | -0.25373400 | -2.40201500 |
| C  | -2.99843600 | 0.34695200  | -0.34376600 |
| H  | -3.32129900 | 1.36967600  | -0.48282500 |
| C  | -2.93470100 | -0.34172600 | 0.89103800  |

#### CoSe2B6-5

|    |             |             |             |
|----|-------------|-------------|-------------|
| B  | -0.03332200 | 0.87569900  | 0.98397800  |
| B  | -0.03339800 | 0.87557800  | -0.98501700 |
| Se | -1.84730500 | 1.56194900  | 0.00011200  |
| Co | 1.41701700  | -0.00143400 | -0.00061400 |
| B  | -0.03336700 | -0.87900200 | -0.98549800 |
| B  | -0.03319600 | -0.87889600 | 0.98462300  |
| Se | -1.84639300 | -1.56369400 | 0.00003400  |

|   |             |             |             |
|---|-------------|-------------|-------------|
| B | -1.56631100 | -0.00083400 | 1.33652900  |
| B | -1.56667200 | -0.00078100 | -1.33660100 |
| H | 0.17504900  | 1.68501100  | -1.82615300 |
| H | 0.17675500  | 1.68455700  | 1.82526800  |
| H | 0.16989700  | -1.68313300 | 1.83212700  |
| H | 0.16814900  | -1.68375700 | -1.83290100 |
| H | -2.16128300 | -0.00140800 | -2.35166600 |
| H | -2.16020500 | -0.00157600 | 2.35201500  |
| H | 3.05776400  | -1.82611200 | -1.37462400 |
| C | 3.08467000  | -0.96152900 | -0.72671600 |
| C | 3.08291100  | -0.98540400 | 0.69547000  |
| H | 3.03353400  | 0.74619000  | -2.16721200 |
| H | 3.05467200  | -1.87099500 | 1.31423500  |
| C | 3.06577200  | 0.35750500  | 1.15917800  |
| H | 3.02886200  | 0.67333600  | 2.19197900  |
| C | 3.04998600  | 1.21398100  | 0.02074500  |
| H | 3.00243500  | 2.29364300  | 0.03902200  |
| C | 3.06865600  | 0.39603000  | -1.14543300 |

#### CoSe2B6-6

|    |             |             |             |
|----|-------------|-------------|-------------|
| H  | -2.89224700 | 0.55932700  | 2.29242200  |
| B  | -2.19148700 | 0.26163800  | 1.38533500  |
| B  | -1.97733600 | 1.47904400  | 0.12607000  |
| H  | -2.62241500 | 2.46385600  | 0.26272700  |
| Co | 0.81096900  | -0.12711300 | 0.09820600  |
| Se | -1.05898400 | -1.36687400 | -0.70767400 |
| B  | -2.65560200 | -0.07145800 | -0.29194400 |
| H  | -3.60548900 | -0.05199900 | -0.99610500 |
| Se | -0.12670000 | 1.92681400  | -0.42596800 |
| B  | -0.54570100 | 0.97896200  | 1.32787600  |
| H  | -0.13994500 | 1.51538800  | 2.30266700  |
| B  | -2.39094300 | -1.31460000 | 0.84432500  |
| H  | -2.95414800 | -2.26534700 | 1.24393600  |
| B  | -0.75319500 | -0.81129400 | 1.35771800  |
| H  | -0.27443000 | -1.50905500 | 2.18517600  |
| H  | 2.22970300  | -0.61562800 | 2.42453700  |
| C  | 2.34315700  | -0.59057700 | 1.35026400  |
| C  | 2.65118300  | 0.55565600  | 0.57147100  |
| H  | 1.76099500  | -2.65789100 | 0.74144300  |
| H  | 2.84417000  | 1.54870100  | 0.95228100  |
| C  | 2.61740900  | 0.17628300  | -0.80962800 |
| H  | 2.78426000  | 0.83294700  | -1.65205500 |
| C  | 2.26506800  | -1.18937200 | -0.87728600 |
| H  | 2.11225500  | -1.76412900 | -1.78048200 |
| C  | 2.08079900  | -1.66425100 | 0.45998300  |

#### CoSe2B6-7

|    |            |             |             |
|----|------------|-------------|-------------|
| B  | 0.54670800 | -0.03437700 | -1.20240200 |
| Se | 0.37485700 | 1.65027300  | -0.03480300 |

|    |             |             |             |
|----|-------------|-------------|-------------|
| B  | 1.49515200  | -0.97363000 | 1.42026400  |
| Se | 2.42660800  | -0.61263700 | -0.50301900 |
| Co | -1.09028500 | -0.21353000 | 0.04310800  |
| B  | 0.52321000  | -1.55016700 | -0.14857200 |
| B  | -0.13665400 | -1.35750000 | 1.40606900  |
| B  | 0.29874600  | 0.23081100  | 1.74433700  |
| B  | 1.87373000  | 0.72518700  | 1.01361700  |
| H  | -0.68101500 | -2.19811700 | 2.03346600  |
| H  | 2.28731500  | -1.51165200 | 2.11194200  |
| H  | 0.41715500  | -0.01154100 | -2.37655000 |
| H  | 2.70852800  | 1.36356200  | 1.54468600  |
| H  | 0.53235300  | -2.57443100 | -0.74556100 |
| H  | 0.06538800  | 0.90579100  | 2.68766500  |
| H  | -2.49539200 | -2.57864300 | -0.09470500 |
| C  | -2.61022000 | -1.50761900 | -0.17919600 |
| C  | -2.46107500 | -0.73981700 | -1.37409600 |
| H  | -3.02469600 | -0.88103400 | 1.92986000  |
| H  | -2.19746600 | -1.13017300 | -2.34679700 |
| C  | -2.62807700 | 0.62403900  | -1.03969800 |
| H  | -2.52522700 | 1.46305700  | -1.71439400 |
| C  | -2.88448600 | 0.70403200  | 0.36596500  |
| H  | -3.00075500 | 1.61493700  | 0.93715900  |
| C  | -2.89993200 | -0.61025300 | 0.89180800  |

#### CoSe2B7-1

|    |             |             |             |
|----|-------------|-------------|-------------|
| B  | -0.12293500 | 0.36440200  | 1.43778800  |
| B  | -0.12275000 | 0.36416000  | -1.43763900 |
| Se | -3.00800300 | -0.14201600 | -0.00009500 |
| B  | -0.22925100 | -1.30475700 | 0.90287200  |
| B  | -1.68347400 | -1.74361800 | 0.00011200  |
| B  | -0.22912900 | -1.30492800 | -0.90247000 |
| Se | 0.00434300  | 1.73345100  | -0.00002800 |
| B  | -1.70610900 | -0.59430400 | -1.43343200 |
| B  | -1.70634600 | -0.59411600 | 1.43351100  |
| Co | 1.29196200  | -0.20315100 | 0.00020700  |
| H  | -2.20469900 | -0.78840100 | -2.48596700 |
| H  | -2.20511400 | -0.78807100 | 2.48598900  |
| H  | 0.22944200  | 0.72397100  | 2.51106700  |
| H  | 0.22987500  | 0.72351400  | -2.51090900 |
| H  | -2.15261200 | -2.82415300 | 0.00016000  |
| H  | 0.20988000  | -2.12889600 | -1.63701800 |
| H  | 0.20969300  | -2.12851700 | 1.63769900  |
| H  | 2.41495800  | -2.72542700 | 0.00093300  |
| C  | 2.68197100  | -1.67821500 | 0.00040500  |
| C  | 2.85882800  | -0.86145800 | 1.15607900  |
| H  | 2.73608500  | -1.18241700 | -2.18090800 |
| H  | 2.73777900  | -1.18061600 | 2.18127400  |
| C  | 3.10270000  | 0.45828300  | 0.71449300  |
| H  | 3.20730200  | 1.32946000  | 1.34619500  |
| C  | 3.10222300  | 0.45768700  | -0.71578600 |

|   |            |             |             |
|---|------------|-------------|-------------|
| H | 3.20632300 | 1.32834900  | -1.34827500 |
| C | 2.85803400 | -0.86241600 | -1.15608400 |

CoSe2B7-2

|    |             |             |             |
|----|-------------|-------------|-------------|
| Se | -0.18649800 | 1.72970400  | -0.64638300 |
| B  | -0.12546200 | 1.18555900  | 1.38038600  |
| B  | 2.58922700  | 0.59030200  | 0.41429300  |
| B  | 0.59791200  | -1.50842100 | 0.28997500  |
| B  | 1.96910700  | -0.87919900 | 1.32842300  |
| B  | 0.26886700  | -0.51680900 | 1.66361700  |
| B  | 1.35248400  | 1.94065100  | 0.54601900  |
| B  | 1.53940500  | 0.75898900  | 1.79285600  |
| Se | 2.22984200  | -0.98858300 | -0.73822700 |
| Co | -1.08315800 | -0.22496800 | 0.11326100  |
| H  | 1.74761300  | 3.04865300  | 0.64675200  |
| H  | 1.99825400  | 1.17174300  | 2.80263100  |
| H  | 3.70036600  | 0.98508900  | 0.34326400  |
| H  | -0.80817600 | 1.81319400  | 2.11358300  |
| H  | 2.64345700  | -1.57843200 | 1.99442200  |
| H  | -0.18297500 | -1.00053900 | 2.64978400  |
| H  | 0.35579000  | -2.66393700 | 0.19565300  |
| H  | -1.99248500 | -2.58347900 | 1.22043200  |
| C  | -2.30647700 | -1.76364500 | 0.59079100  |
| C  | -2.14463100 | -1.69085800 | -0.82719400 |
| H  | -3.05302300 | -0.26512300 | 2.06645600  |
| H  | -1.70871700 | -2.45521400 | -1.45420400 |
| C  | -2.60827800 | -0.42112600 | -1.24950400 |
| H  | -2.57910700 | -0.03901000 | -2.26057000 |
| C  | -3.05248900 | 0.29493700  | -0.09962500 |
| H  | -3.41622900 | 1.31282300  | -0.08824500 |
| C  | -2.86994000 | -0.54016100 | 1.03734600  |

CoSe2B8-1

|    |             |             |             |
|----|-------------|-------------|-------------|
| B  | 0.37681300  | 0.89440500  | 1.41743400  |
| Se | 0.46437300  | 1.69880000  | -0.54399700 |
| B  | 1.82574000  | 0.00011300  | 1.79566100  |
| Se | 0.46473400  | -1.69882500 | -0.54396700 |
| B  | 2.28774200  | 0.86650900  | -0.92700100 |
| B  | 2.05933000  | -1.43587900 | 0.80313500  |
| B  | 2.28791600  | -0.86606400 | -0.92703400 |
| Co | -1.00254400 | -0.00013900 | 0.09697000  |
| B  | 0.37700200  | -0.89444600 | 1.41740800  |
| B  | 2.05898400  | 1.43621000  | 0.80320600  |
| H  | 2.48986700  | 2.45248700  | 1.21450100  |
| H  | -0.15866400 | 1.57516500  | 2.22180600  |
| H  | 2.49047200  | -2.45207700 | 1.21435400  |
| H  | 2.91519300  | -1.55625900 | -1.65385800 |
| H  | 2.91485900  | 1.55690300  | -1.65377400 |
| H  | 2.19977800  | 0.00014200  | 2.91541700  |

|   |             |             |             |
|---|-------------|-------------|-------------|
| B | 2.96709300  | 0.00027100  | 0.42883600  |
| H | -0.15834700 | -1.57546700 | 2.22165200  |
| H | 4.13995500  | 0.00040100  | 0.56861300  |
| H | -2.57979600 | 2.17098400  | 0.80762700  |
| C | -2.63488400 | 1.14392900  | 0.47387600  |
| C | -2.64919000 | -0.00241100 | 1.30862000  |
| H | -2.65097700 | 1.34594600  | -1.76224800 |
| H | -2.57643800 | -0.00459300 | 2.38663400  |
| C | -2.63488200 | -1.14549000 | 0.46934500  |
| H | -2.57985000 | -2.17383700 | 0.79912200  |
| C | -2.66711400 | -0.70246000 | -0.89383600 |
| H | -2.65126000 | -1.33886700 | -1.76758600 |
| C | -2.66706900 | 0.70611000  | -0.89098800 |

CoSe2B8-2

|    |             |             |             |
|----|-------------|-------------|-------------|
| Se | -0.06227500 | 1.64497000  | -0.51177600 |
| B  | -1.54123600 | 1.59865500  | 1.00139100  |
| Se | -2.08361100 | -1.01505500 | -0.79063700 |
| B  | -0.01086600 | -0.83256100 | 1.62558500  |
| B  | 0.15178500  | 0.93021500  | 1.48959200  |
| B  | -1.65618200 | -1.30065900 | 1.27305200  |
| B  | -1.36611000 | 0.24005100  | 2.07186400  |
| Co | 1.21146700  | -0.20145600 | 0.10557000  |
| B  | -0.28239200 | -1.56577500 | 0.08367400  |
| B  | -1.99573900 | 1.02277500  | -0.64947600 |
| H  | -2.70683500 | 1.62332200  | -1.37221500 |
| H  | -1.91308800 | 2.66937400  | 1.32112500  |
| H  | -2.26672500 | -2.19413600 | 1.73928600  |
| H  | 0.52127100  | -1.43313000 | 2.49998700  |
| H  | -1.69825600 | 0.37000300  | 3.19725100  |
| H  | 0.78425600  | 1.65587900  | 2.17689600  |
| B  | -2.61638700 | 0.23591700  | 0.85682800  |
| H  | -0.07513700 | -2.69339400 | -0.22512000 |
| H  | -3.77443400 | 0.29512400  | 1.06003100  |
| H  | 2.60314600  | 0.57438200  | -2.22001300 |
| C  | 2.71218400  | 0.05111600  | -1.27894200 |
| C  | 2.46226300  | -1.32435800 | -1.06688800 |
| H  | 3.33567300  | 1.69079600  | 0.12157700  |
| H  | 2.13952000  | -2.04212200 | -1.80634800 |
| C  | 2.66047300  | -1.57594100 | 0.32442100  |
| H  | 2.49603300  | -2.51914200 | 0.82571100  |
| C  | 3.07998600  | -0.36157600 | 0.94875400  |
| H  | 3.26356000  | -0.22968200 | 2.00577100  |
| C  | 3.10628900  | 0.64606500  | -0.03648400 |

CoSe2B8-3

|    |             |             |             |
|----|-------------|-------------|-------------|
| B  | -0.06871000 | 1.45164200  | 0.96013900  |
| Se | -0.12182600 | -1.63567800 | -0.17548500 |
| B  | -1.64210100 | -0.99993200 | 1.02757200  |

|    |             |             |             |
|----|-------------|-------------|-------------|
| B  | -1.54075500 | 0.71784100  | 1.53576200  |
| B  | -0.03693600 | 1.51510400  | -0.81616900 |
| B  | -0.07589800 | -0.11361600 | -1.54564200 |
| B  | -1.50700100 | 0.87798100  | -1.48866800 |
| B  | -1.51252800 | 1.86277300  | 0.03199800  |
| Se | -2.83884500 | 0.19963800  | -0.10317800 |
| B  | -0.08719200 | -0.21210300 | 1.52068800  |
| Co | 1.33266800  | 0.20282000  | 0.01020400  |
| H  | -2.18762000 | -1.81891700 | 1.67712800  |
| H  | -2.11741300 | 1.02014300  | 2.51783600  |
| H  | -2.06777900 | 1.31562300  | -2.43393600 |
| H  | -2.07453900 | 2.89370100  | 0.13041900  |
| H  | 0.47006000  | -0.43076900 | -2.55176800 |
| H  | 0.45302600  | 2.39386100  | -1.44695200 |
| H  | 0.38703000  | 2.31626200  | 1.63140700  |
| H  | 0.37484400  | -0.65549500 | 2.51517200  |
| H  | 2.71316500  | 2.57558500  | 0.16306300  |
| C  | 2.86575400  | 1.50757600  | 0.09913800  |
| C  | 2.94887900  | 0.74755800  | -1.10374500 |
| H  | 2.86819700  | 0.87983300  | 2.24751800  |
| H  | 2.85717800  | 1.13811100  | -2.10670500 |
| C  | 3.04622100  | -0.61699100 | -0.74090000 |
| H  | 3.05892600  | -1.45533000 | -1.42406800 |
| C  | 3.05638600  | -0.69919900 | 0.68796500  |
| H  | 3.06186600  | -1.61213200 | 1.26742200  |
| C  | 2.95599700  | 0.60943700  | 1.20489600  |

#### CoSe2B8-4

|    |             |             |             |
|----|-------------|-------------|-------------|
| Co | 1.19551800  | -0.21260400 | 0.08037000  |
| B  | -0.38835800 | -0.28526800 | -1.24889500 |
| B  | -0.06159300 | -0.69718100 | 1.65492500  |
| B  | -1.49368900 | 1.73249500  | 0.90493700  |
| Se | -2.26868100 | -0.89244800 | -0.68254300 |
| B  | -1.36441900 | 0.43724900  | 2.06596600  |
| B  | -2.61905100 | 0.45605900  | 0.83503900  |
| Se | -0.13550600 | 1.62294800  | -0.63190000 |
| B  | 0.11944500  | 1.06739100  | 1.46016000  |
| B  | -0.39003300 | -1.51734100 | 0.15273500  |
| H  | -0.19120300 | -2.65507000 | -0.10703400 |
| H  | -0.11984500 | -0.57104900 | -2.36726900 |
| H  | -1.67655900 | 0.65783500  | 3.18477600  |
| H  | -1.70541200 | 2.85987300  | 1.19531100  |
| H  | -3.77550600 | 0.48444400  | 1.08385400  |
| H  | 0.46607600  | -1.30872000 | 2.52331500  |
| B  | -1.75573000 | -1.11090600 | 1.34502300  |
| H  | 0.88585600  | 1.74379900  | 2.05510500  |
| H  | -2.31418500 | -2.00847000 | 1.86534700  |
| H  | 2.40292300  | -2.52277800 | 0.98272400  |
| C  | 2.61610800  | -1.59106400 | 0.47820100  |
| C  | 2.95564900  | -0.35759000 | 1.10963100  |

|   |            |             |             |
|---|------------|-------------|-------------|
| H | 2.25354700 | -2.09411400 | -1.66996700 |
| H | 3.02366400 | -0.18982200 | 2.17485500  |
| C | 3.06484800 | 0.62713300  | 0.10128500  |
| H | 3.23549100 | 1.68256600  | 0.26314300  |
| C | 2.81186900 | 0.00500100  | -1.16088100 |
| H | 2.77641700 | 0.50552400  | -2.11896900 |
| C | 2.54639600 | -1.36567900 | -0.92716600 |

CoSe2B8-5

|    |             |             |             |
|----|-------------|-------------|-------------|
| Se | -1.79520200 | -1.65543900 | -0.17920900 |
| Co | 1.39637900  | -0.00046100 | -0.00312300 |
| B  | -0.02341900 | 0.87836300  | -1.11415600 |
| B  | -1.58301900 | 0.00023100  | -1.35265300 |
| B  | -1.31373200 | -0.85784400 | 1.65730100  |
| B  | 0.21199700  | -0.00058300 | 1.67862600  |
| B  | 0.13803700  | 1.45361300  | 0.71075200  |
| B  | -1.31311700 | 0.85805900  | 1.65741200  |
| Se | -1.79422900 | 1.65597100  | -0.17912100 |
| B  | -0.02379300 | -0.87853100 | -1.11436800 |
| B  | 0.13713100  | -1.45432500 | 0.71006900  |
| H  | 0.28021600  | 1.55800000  | -2.03539100 |
| H  | -2.15514300 | 0.00051900  | -2.38427300 |
| H  | 0.59313100  | 2.52662100  | 0.91915800  |
| H  | -1.68461400 | 1.58333900  | 2.51623000  |
| H  | 0.76819400  | -0.00077400 | 2.72894200  |
| H  | -1.68561100 | -1.58296800 | 2.51607900  |
| H  | 0.59179200  | -2.52741200 | 0.91903100  |
| H  | 0.27914100  | -1.55865900 | -2.03548000 |
| H  | 2.91735000  | 2.16990300  | -0.86095800 |
| C  | 3.00948600  | 1.14599700  | -0.52710800 |
| C  | 2.94311000  | -0.01050500 | -1.35107000 |
| H  | 3.13452600  | 1.36091600  | 1.69345400  |
| H  | 2.80304600  | -0.02024400 | -2.42262700 |
| C  | 3.01217300  | -1.15236900 | -0.50699100 |
| H  | 2.92257300  | -2.18213600 | -0.82306500 |
| C  | 3.12571900  | -0.70213600 | 0.83664600  |
| H  | 3.13788800  | -1.32876500 | 1.71665500  |
| C  | 3.12376100  | 0.71919600  | 0.82433800  |

CoSe2B9-1

|    |             |             |             |
|----|-------------|-------------|-------------|
| B  | -1.54511500 | 1.15038900  | 0.98366600  |
| B  | -0.53480400 | -0.96608300 | -1.15369100 |
| Se | -2.33849600 | -0.03981300 | -1.00003300 |
| B  | -1.84167200 | -1.83887700 | -0.16196400 |
| B  | -0.12015200 | -1.92260500 | 0.21104900  |
| Co | 1.16724600  | -0.25726700 | -0.02635400 |
| B  | -1.32082400 | -1.74747300 | 1.51261200  |
| Se | 0.10138300  | 1.86099900  | 0.02284300  |
| B  | -2.45840700 | -0.51396500 | 1.01237600  |

|   |             |             |             |
|---|-------------|-------------|-------------|
| B | 0.25403100  | -1.03356900 | 1.69573400  |
| B | 0.29228700  | 0.74249100  | 1.68663300  |
| B | -1.19223900 | -0.11566400 | 2.15339500  |
| H | -1.65705800 | -2.63545200 | 2.21310000  |
| H | -2.28064000 | 2.03619000  | 1.25466200  |
| H | -3.58420900 | -0.45886400 | 1.35706500  |
| H | 0.42398700  | -2.96038200 | 0.02118700  |
| H | -1.57131300 | 0.07164800  | 3.25908000  |
| H | 0.97722200  | -1.48819600 | 2.51846500  |
| H | 0.92958200  | 1.24599700  | 2.54791500  |
| H | -2.50352800 | -2.74255900 | -0.52813900 |
| H | -0.30133000 | -1.22463300 | -2.28666300 |
| H | 2.78922000  | -2.35675400 | 0.79268400  |
| C | 2.80578300  | -1.45617000 | 0.19685500  |
| C | 3.12909800  | -0.15363900 | 0.65647200  |
| H | 2.08286900  | -2.18018800 | -1.78924800 |
| H | 3.39453400  | 0.11668200  | 1.66826600  |
| C | 2.93666700  | 0.74080500  | -0.42391200 |
| H | 3.04741000  | 1.81564200  | -0.37338400 |
| C | 2.50802600  | -0.00110700 | -1.56575200 |
| H | 2.25656700  | 0.40340600  | -2.53567500 |
| C | 2.43331900  | -1.36153100 | -1.17738500 |

#### CoSe2B9-2

|    |             |             |             |
|----|-------------|-------------|-------------|
| B  | 0.29646800  | -0.20743700 | 1.93543900  |
| B  | 2.84619800  | 0.15788500  | 0.72709400  |
| B  | 1.90692700  | -0.88911200 | 1.81546000  |
| B  | 1.69573600  | 0.85399000  | 1.88417400  |
| B  | 2.31890700  | 0.02829000  | -0.87109200 |
| B  | 2.33304600  | -1.45801900 | 0.22170000  |
| B  | 1.84755500  | 1.53035000  | 0.22297800  |
| B  | 0.61221700  | -1.60681500 | 0.91864600  |
| B  | 0.19462000  | 1.45173900  | 1.24638700  |
| Se | 0.78965800  | -1.25642100 | -1.15583400 |
| Co | -0.93270100 | -0.14451800 | 0.19240900  |
| Se | 0.01898100  | 1.86795300  | -0.72418400 |
| H  | 2.44884500  | 2.54422800  | 0.10841300  |
| H  | -0.32285600 | -0.35913000 | 2.93574000  |
| H  | -0.33039100 | 2.27778000  | 1.91229100  |
| H  | 2.96317100  | 0.19683900  | -1.84435500 |
| H  | 0.16422000  | -2.68442500 | 1.11061900  |
| H  | 2.99567600  | -2.41622900 | 0.04708100  |
| H  | 2.09216700  | 1.42807100  | 2.83764200  |
| H  | 3.98744100  | 0.43047000  | 0.86525600  |
| H  | 2.37517500  | -1.46794500 | 2.73147800  |
| H  | -2.59152900 | -0.39656800 | -2.08115400 |
| C  | -2.58635600 | -0.43070300 | -1.00079200 |
| C  | -2.77827200 | 0.67060800  | -0.12387400 |
| H  | -2.09431900 | -2.56710000 | -0.55027400 |
| H  | -2.93710100 | 1.69866000  | -0.41954400 |



|   |             |             |             |
|---|-------------|-------------|-------------|
| C | -2.64595000 | 0.21097500  | 1.21718300  |
| H | -2.68487300 | 0.82374500  | 2.10575600  |
| C | -2.38967700 | -1.18748600 | 1.17258900  |
| H | -2.18674600 | -1.82358200 | 2.02119900  |
| C | -2.34108400 | -1.57660900 | -0.19152800 |

CoSe2B9-3

|    |             |             |             |
|----|-------------|-------------|-------------|
| Se | 2.95987900  | -0.33560200 | -0.41208600 |
| B  | -0.41375500 | 1.70786200  | 0.73485700  |
| B  | 1.80657600  | -0.17423800 | 1.31241600  |
| B  | 2.49055500  | 1.42107200  | 0.44680100  |
| B  | 1.05172700  | 2.26419700  | -0.00917600 |
| B  | 1.12212700  | 1.42931900  | 1.55729600  |
| Se | 0.10342000  | -1.47653000 | 0.29697900  |
| Co | -1.50440900 | 0.12085200  | -0.05370300 |
| B  | 0.16659900  | -0.26561800 | -1.31065100 |
| B  | -0.12405600 | 1.38936000  | -0.98826600 |
| B  | 1.61324200  | 1.04196400  | -1.21785200 |
| B  | -0.08833500 | 0.15534900  | 1.55938300  |
| H  | 0.05413400  | -0.82406200 | -2.34948900 |
| H  | 1.30280600  | 1.94947400  | 2.60366300  |
| H  | 3.43192400  | 2.08413400  | 0.70523700  |
| H  | -0.48273400 | -0.20539000 | 2.61605000  |
| H  | 2.26862900  | -0.78499400 | 2.21049000  |
| H  | -0.55314700 | 1.99541000  | -1.91616600 |
| H  | -1.13227600 | 2.53119600  | 1.19113400  |
| H  | 2.06462500  | 1.43366400  | -2.23827100 |
| H  | 1.21103700  | 3.42768300  | -0.13272000 |
| H  | -3.36239600 | 1.18222000  | 1.76031700  |
| C  | -3.29585000 | 0.64667100  | 0.82422900  |
| C  | -3.21848200 | -0.75654700 | 0.66998800  |
| H  | -3.09469000 | 2.29458000  | -0.67420300 |
| H  | -3.22763400 | -1.48446200 | 1.46973200  |
| C  | -3.05360100 | -1.04341100 | -0.72194300 |
| H  | -2.93049700 | -2.02540300 | -1.15711700 |
| C  | -3.01454600 | 0.18632900  | -1.42095700 |
| H  | -2.83912300 | 0.31419700  | -2.47957700 |
| C  | -3.14538000 | 1.23610900  | -0.46290600 |

CoSe2B9-4

|    |             |             |             |
|----|-------------|-------------|-------------|
| B  | -0.31820700 | 1.56651300  | 0.51058900  |
| B  | 1.15356600  | -1.92513900 | 1.00720600  |
| Se | 1.48490700  | 1.84584400  | -0.35932900 |
| B  | 1.17296200  | 1.08703500  | 1.54820200  |
| B  | 2.28005600  | -0.41834100 | 1.07310000  |
| Se | 2.00547600  | -1.29823800 | -0.74674800 |
| Co | -1.43308200 | -0.06583700 | 0.03018900  |
| B  | -0.02190800 | -1.46711900 | -0.36847300 |
| B  | -0.47141500 | 0.39844400  | 1.79807100  |

|   |             |             |             |
|---|-------------|-------------|-------------|
| B | -0.44918300 | -1.30726600 | 1.33848500  |
| B | 0.96925000  | -0.57848800 | 2.13512500  |
| B | 0.18235500  | 0.38573600  | -1.03983000 |
| H | -1.13260100 | 0.73906400  | 2.72142500  |
| H | -0.41016800 | -2.31830000 | -1.09751500 |
| H | 1.61028300  | 1.85211000  | 2.33495700  |
| H | -0.90808400 | 2.58561400  | 0.64073400  |
| H | 0.04865800  | 0.49079400  | -2.21454500 |
| H | -1.12525600 | -2.08991200 | 1.91769100  |
| H | 1.43071000  | -3.02852700 | 1.31399400  |
| H | 1.25660400  | -0.69278300 | 3.27677200  |
| H | 3.41455400  | -0.36262600 | 1.38861100  |
| H | -2.46459300 | -0.83199400 | -2.46759700 |
| C | -2.77516300 | -0.47573700 | -1.49558800 |
| C | -2.86472100 | 0.88411800  | -1.09443300 |
| H | -3.00729300 | -2.36171600 | -0.32648300 |
| H | -2.65771800 | 1.74637400  | -1.71228700 |
| C | -3.22789400 | 0.91154200  | 0.28362900  |
| H | -3.30999400 | 1.79515700  | 0.90009300  |
| C | -3.34783400 | -0.42556500 | 0.73174800  |
| H | -3.53830600 | -0.73822700 | 1.74851000  |
| C | -3.06338600 | -1.28317400 | -0.36622300 |

#### CoSe2B9-5

|    |             |             |             |
|----|-------------|-------------|-------------|
| B  | 0.06156400  | 0.78799700  | -1.53180700 |
| B  | 1.62522100  | -0.00848200 | 1.66952200  |
| B  | 0.06141500  | 0.78813900  | 1.53178400  |
| Se | 2.78187000  | 0.01592500  | 0.00002800  |
| B  | 1.73889200  | -1.62892500 | 0.94209000  |
| B  | 0.24027200  | -0.99769400 | 1.49638300  |
| B  | 1.73891100  | -1.62904400 | -0.94181600 |
| Se | -0.33727000 | 1.95041300  | -0.00007900 |
| B  | 1.62524800  | -0.00871400 | -1.66951500 |
| B  | 0.29245800  | -1.90976600 | 0.00013400  |
| Co | -1.17151800 | -0.29142800 | -0.00001500 |
| B  | 0.24028800  | -0.99791700 | -1.49622600 |
| H  | 2.38863600  | -2.47804200 | -1.43670800 |
| H  | -0.44940200 | 1.22737300  | -2.50935400 |
| H  | 2.25871400  | 0.21829200  | -2.64324200 |
| H  | 2.38858500  | -2.47787500 | 1.43710700  |
| H  | -0.25172000 | -1.44109400 | 2.48150400  |
| H  | -0.25170200 | -1.44140600 | -2.48130600 |
| H  | -0.17587400 | -2.99996200 | 0.00026400  |
| H  | 2.25861500  | 0.21878400  | 2.64323600  |
| H  | -0.44954300 | 1.22759800  | 2.50929200  |
| H  | -2.26660000 | -2.43580000 | 1.34294400  |
| C  | -2.54309200 | -1.60158800 | 0.71526100  |
| C  | -2.54298900 | -1.60188700 | -0.71490500 |
| H  | -2.91309100 | 0.03910600  | 2.18171300  |
| H  | -2.26641200 | -2.43636200 | -1.34219900 |

|   |             |             |             |
|---|-------------|-------------|-------------|
| C | -2.88217800 | -0.29864300 | -1.15603100 |
| H | -2.91279600 | 0.03818400  | -2.18210800 |
| C | -3.09027500 | 0.50312700  | -0.00031100 |
| H | -3.31901900 | 1.55923100  | -0.00054800 |
| C | -2.88232500 | -0.29815800 | 1.15578300  |

CoSe2B9-6

|    |             |             |             |
|----|-------------|-------------|-------------|
| Se | 1.26475600  | 1.96601500  | -0.15472300 |
| B  | -0.34511400 | -1.64301600 | 0.56945400  |
| B  | 1.39370000  | -0.53145000 | -1.46533200 |
| Se | 2.74739800  | -0.94475600 | -0.04883700 |
| B  | 1.08437500  | -2.04944300 | -0.35701800 |
| B  | -0.18753000 | -1.09067600 | -1.14631300 |
| B  | -0.45866500 | 1.33695100  | 0.74096300  |
| Co | -1.60206800 | -0.16029500 | 0.01681800  |
| B  | 1.17031500  | 0.77040800  | 1.46637000  |
| B  | -0.25149100 | -0.18359900 | 1.59812600  |
| B  | 1.21965500  | -1.17172300 | 1.31495700  |
| B  | -0.07979600 | 0.69283100  | -1.10405700 |
| H  | 1.77042000  | 1.16919500  | 2.40209800  |
| H  | -0.70245300 | -1.54227500 | -2.11811600 |
| H  | -1.10285300 | 2.24511900  | 1.14580000  |
| H  | -0.47071900 | 1.27203500  | -2.06448300 |
| H  | 1.85885300  | -0.47356600 | -2.54908700 |
| H  | -0.64705100 | -0.32559200 | 2.70999700  |
| H  | -0.89598700 | -2.62097600 | 0.95044100  |
| H  | 1.63410600  | -1.76620000 | 2.24746700  |
| H  | 1.27681400  | -3.19914500 | -0.53782200 |
| H  | -3.11180800 | -2.30867700 | -0.89567000 |
| C  | -3.21709300 | -1.29861800 | -0.52575100 |
| C  | -3.15786800 | -0.11237200 | -1.31326000 |
| H  | -3.32533200 | -1.58702400 | 1.68421700  |
| H  | -3.00406000 | -0.06939400 | -2.38211600 |
| C  | -3.23585300 | 0.99890100  | -0.43632500 |
| H  | -3.15992300 | 2.03910200  | -0.71930700 |
| C  | -3.33551100 | 0.50086300  | 0.89241500  |
| H  | -3.33745000 | 1.09824100  | 1.79296600  |
| C  | -3.33154400 | -0.91828900 | 0.83539000  |
